# Supplementary material
Source: HighWire-hosted journal article supplement (https://gut.bmj.com/content/70/4/687)
Supplement: inline-supplementary-material-2 [file inline-supplementary-material-2.xlsx]

## Sheet: mouse DEG
MOUSE
DEG = Differentially expressed genes
Adjusted p-value < 0.05, fold change cut-off is 2 fold.
	DEG between murine gastric and proximal intestinal organoids																									DEG between murine proximal intestinal and colon organoids
	Analzyed			Raw data: Read counts of sequencing																						Analzyed			Raw data: Read counts of sequencing
Gene	log2FoldChange	lfcSE	padj	Corp_org_1	Corp_org_2	Corp_org_3	Pyl_org_1	Pyl_org_2	Pyl_org_3	Duod_org_1	Duod_org_2	Duod_org_3	Jej_org_1	Jej_org_2	Jej_org_3	Ileum_org_1	Ileum_org_2	Ileum_org_3	Colon_org_1	Colon_org_2	Colon_org_3				Gene	log2FoldChange	lfcSE	padj	Corp_org_1	Corp_org_2	Corp_org_3	Pyl_org_1	Pyl_org_2	Pyl_org_3	Duod_org_1	Duod_org_2	Duod_org_3	Jej_org_1	Jej_org_2	Jej_org_3	Ileum_org_1	Ileum_org_2	Ileum_org_3	Colon_org_1	Colon_org_2	Colon_org_3
Ush1c	-10.1348	0.401204	1.52871e-116	8	1	0	10	0	0	6743	7515	7826	7499	7618	8079	5203	4721	8549	7628	7230	6968				Zfpm1	0.204459	5.53256	5.39277e-150	4882	5659	4530	4904	6606	6363	6510	6068	6538	4584	5358	6041	833	1046	1173	137	97	113
Aldh1b1	-8.4775	0.347927	8.6012e-110	25	20	41	21	53	37	25230	27964	27300	19543	21158	25645	8944	12979	19674	3969	4988	5438				B3galt5	0.320044	-8.23335	1.46946e-119	5	20	9	6	5	4	51	69	49	50	46	74	41	45	59	18545	15700	12220
Fcgbp	-6.9968	0.310051	8.57924e-94	106	109	91	46	42	68	57479	54463	52487	25594	30583	30678	9363	15501	37992	9374	7822	7635				Gm1123	0.289884	6.74649	2.80727e-109	4	2	1	0	2	0	5496	4976	4293	3749	3431	3639	2035	3160	9023	13	18	16
Tm4sf4	-10.7976	0.521987	1.27729e-70	4	5	0	0	1	0	4595	5851	5154	5550	6221	3962	6652	4614	6058	61	29	41				Myrf	0.415764	9.74021	1.379e-95	17656	18527	16400	10733	14496	14235	7403	7039	6010	3883	4857	4730	5303	5545	4506	0	11	3
Enah	7.36671	0.37369	3.45059e-66	4860	4568	5288	5188	5824	5543	2	13	9	5	10	11	90	75	14	9	11	18				Otc	0.283375	6.09489	1.88377e-92	0	0	0	0	0	0	7315	6956	6534	3474	3633	4338	418	915	3074	17	33	18
Gm1123	-9.0713	0.459607	1.54389e-64	4	2	1	0	2	0	5496	4976	4293	3749	3431	3639	2035	3160	9023	13	18	16				Stxbp1	0.17316	-3.44463	5.68125e-81	317	283	269	279	282	305	263	278	284	177	240	216	772	846	530	4504	3193	2921
AC133488.1	-5.0428	0.290929	2.52879e-60	20	20	14	16	13	23	538	379	406	371	462	453	613	655	373	255	205	255				Myrfl	0.434206	9.06841	1.04148e-77	2	2	0	0	0	0	3943	3823	3833	3051	3525	3614	2014	2338	3997	5	5	1
Far2	-9.04175	0.488555	1.78173e-59	1	4	2	8	0	1	5783	4844	4611	3013	3223	4068	955	1919	2424	9	18	4				Hao2	0.501845	-10.9131	7.89689e-72	0	0	0	0	0	0	5	1	4	3	0	0	7	8	18	3871	3713	2628
Tle4	-4.14092	0.245014	9.16618e-58	142	131	171	175	273	168	1979	1780	1916	1754	1878	1930	2090	2291	1229	2314	1694	1471				Tm4sf4	0.357471	6.76734	8.20967e-69	4	5	0	0	1	0	4595	5851	5154	5550	6221	3962	6652	4614	6058	61	29	41
Cldn18	11.5356	0.530392	4.94104e-56	33788	35610	22993	30090	38513	32128	5	12	2	3	2	3	7	12	2	4	1	3				Far2	0.409381	7.73553	3.94962e-67	1	4	2	8	0	1	5783	4844	4611	3013	3223	4068	955	1919	2424	9	18	4
Cdx1	-11.5092	0.561731	2.80057e-53	0	0	0	1	0	0	4454	4915	5015	3701	4437	5177	3869	4354	6302	7364	6734	6209				Gsdmc3	0.610881	-13.6886	8.85813e-66	0	2	0	0	0	0	2	0	0	2	0	2	1	7	114	2315	7503	6081
Prkg2	-9.659	0.533086	8.1098e-53	3	5	2	0	2	2	3168	3699	3522	5767	4995	5422	2430	2758	4299	1373	1512	1903				Nrp2	0.24543	-4.31238	2.25076e-61	1772	1730	1910	1960	1863	2015	100	122	176	96	118	96	234	346	201	3513	3119	2519
Mlxipl	-6.39352	0.372504	2.05315e-51	52	64	65	91	41	33	13889	12508	16494	8900	10367	11941	1974	3352	5771	1258	945	760				Ccl25	0.229279	4.06357	3.57457e-61	191	167	178	133	153	140	9143	9846	11375	8594	8282	9511	488	896	4244	189	192	173
Fut2	5.93351	0.361133	6.00292e-51	5173	5742	5164	5188	4182	5484	202	237	218	97	110	85	333	304	562	1052	1176	1361				Hmgcll1	0.38238	-6.91464	1.82504e-60	350	274	318	446	532	371	0	0	0	8	3	10	440	313	89	1529	1193	1479
Vipr1	-7.16735	0.417056	2.47769e-50	17	25	30	47	33	9	5807	5805	6144	5969	6636	6728	2987	3821	5402	9844	7842	6581				Cybrd1	0.418444	7.83296	3.05075e-59	36074	42714	34521	22465	17941	16040	12455	17047	8181	9894	5798	7123	641	539	2160	11	24	14
Gngt2	-6.55685	0.399219	3.00944e-50	2	3	2	8	0	0	516	626	554	407	429	389	515	527	805	292	231	269				Gata5	0.477324	9.30135	6.82567e-54	4700	4901	4245	4699	7003	6920	1546	1775	1999	1548	1697	1698	2778	3205	2341	2	4	0
Cpne8	9.38255	0.530104	5.01296e-50	877	893	1026	988	897	918	0	3	0	0	2	2	30	19	39	662	733	743				Gsdmc4	0.599952	-11.213	1.67525e-52	0	8	2	5	0	2	26	15	4	2	4	7	2	16	142	10534	14598	8472
Eya2	9.1183	0.510734	1.93607e-48	4379	5664	4415	4268	4667	5485	6	8	7	11	13	2	21	20	29	81	200	77				Gna14	0.492888	-8.41259	2.70163e-50	837	831	1738	953	1196	842	11	9	19	2	2	6	20	18	60	1588	2492	2742
Icam1	5.37836	0.33169	8.7951e-47	2936	2494	2425	2636	3802	3398	21	27	29	10	20	21	202	181	41	336	323	244				Cpne8	0.493747	-8.75705	1.0846e-49	877	893	1026	988	897	918	0	3	0	0	2	2	30	19	39	662	733	743
Myrfl	-10.5419	0.554356	9.63258e-47	2	2	0	0	0	0	3943	3823	3833	3051	3525	3614	2014	2338	3997	5	5	1				Foxd2	0.472423	-9.37207	8.74967e-49	0	0	0	0	2	2	6	10	6	1	5	4	2	2	36	836	1433	1382
Nfe2l3	6.58073	0.401709	4.53788e-46	3183	2670	3535	2932	3764	3888	30	30	32	18	26	14	71	46	50	623	387	256				Nectin1	0.18401	2.82064	3.2118e-48	755	852	766	605	751	903	1378	1424	1384	1328	1427	1526	929	1131	1170	251	181	161
B4galnt2	-11.6268	0.572995	2.10995e-45	0	0	1	2	0	0	13293	15010	14533	14597	14231	14383	4486	4819	16632	7214	10423	11379				Rhobtb3	0.459356	7.47695	3.08589e-47	627	515	777	725	949	874	1847	1984	1898	1196	980	1232	130	269	215	5	10	3
Greb1	-7.52768	0.466213	2.10995e-45	2	2	3	4	6	8	2142	2166	1498	1054	964	1151	2594	2207	3080	5975	6199	7187				Btbd11	0.322241	-5.1152	1.64079e-45	626	658	586	989	1191	926	3	8	8	12	7	12	130	82	29	1129	816	761
Slc45a3	3.5423	0.240224	2.1241e-42	4652	4949	3932	4324	5194	4950	185	249	132	200	214	188	1159	812	436	3373	2607	2291				Defa17	0.543419	9.15252	1.94027e-44	0	0	0	0	0	0	9146	13539	17396	19034	14969	16958	1865	4304	19826	2	8	9
Ctse	8.17918	0.483806	2.35057e-42	41138	40438	29970	20433	41477	40490	30	129	66	65	115	59	132	113	87	79	118	72				Gm53	0.684359	-11.1314	4.71876e-42	0	0	0	0	0	0	1	0	0	0	0	0	1640	1468	455	3250	3110	3131
Golm1	2.13086	0.149522	2.35057e-42	54304	51676	40666	39733	46416	50983	15201	15453	14271	11219	12992	12762	13274	14226	15719	41496	34223	29980				Slc45a3	0.205514	-2.91381	3.81224e-40	4652	4949	3932	4324	5194	4950	185	249	132	200	214	188	1159	812	436	3373	2607	2291
Vdr	-3.67693	0.245344	2.83869e-42	403	337	338	172	233	272	26744	26638	22348	13004	13019	14157	2929	4103	15425	7111	6610	6548				Oat	0.20989	2.95606	2.31823e-38	5633	5257	6838	4682	4524	5458	73939	83697	92073	65431	57462	73226	7227	13736	46899	3676	3653	3572
9130208D14Rik	-11.6849	0.661202	2.31563e-41	0	0	1	0	0	0	19741	19085	27255	7109	7876	11008	2371	4146	9641	5114	4161	4331				Cryz	0.190567	-2.57914	1.59666e-37	907	846	974	743	787	790	214	250	169	187	182	154	156	166	190	1179	1092	931
Psap	2.16408	0.154985	9.66779e-41	45551	41978	33793	29883	34681	37784	13486	14464	13172	10464	11169	12010	11620	11785	15350	19419	20289	21125				Fa2h	0.51682	-7.73248	3.58418e-37	825	1058	344	345	265	217	8	11	18	14	9	11	42	19	74	2393	2104	2474
Otc	-10.5623	0.697817	1.52387e-40	0	0	0	0	0	0	7315	6956	6534	3474	3633	4338	418	915	3074	17	33	18				Slc44a1	0.0928496	-1.22427	1.26682e-36	5252	5637	5088	5067	4932	4872	10169	10902	9930	7451	7876	8534	9869	9697	12238	20172	18623	17385
Muc13	-10.5652	0.581435	2.1492e-40	19	14	4	0	1	0	34686	33058	35014	39453	37839	37092	14936	14902	35443	37132	33954	30302				Itih5	0.383772	-5.4981	3.35883e-36	5	6	13	5	4	2	456	367	355	245	361	311	1432	903	2974	15166	10998	7008
Abcc6	-4.91079	0.336817	6.53084e-40	7	15	7	7	16	6	1200	1231	1299	748	773	942	94	189	403	111	136	76				Defa24	0.511688	8.02377	3.663e-36	0	0	0	0	0	0	25113	34093	49660	30113	21801	25651	3151	7184	36905	3	33	38
Tmed3	2.09917	0.152919	1.23945e-39	3206	3013	3405	3030	2816	2870	1549	1553	1616	1154	1272	1238	973	1064	1938	1626	1532	1448				Ptgr1	0.341489	4.7325	1.75738e-34	15783	18125	11823	24502	16355	16596	9076	11246	11209	10406	11202	11431	2153	5063	5140	453	328	260
Aoc1	-11.2043	0.660995	2.15689e-39	0	1	0	0	0	0	5551	5806	5706	6097	7207	7206	1342	1735	4690	8470	5947	3837				Hoxa7	0.572133	-10.9748	1.90231e-34	0	0	0	0	0	1	1	8	11	1	0	1	0	0	56	2042	2028	2271
Ms4a10	-8.84223	0.545579	5.8792e-39	2	4	4	9	8	10	2820	3343	2813	6173	6204	6035	1278	1319	1960	890	991	744				Foxd2os	0.545251	-8.26211	3.01065e-34	0	0	0	0	1	0	2	6	2	0	1	5	6	18	20	543	843	784
Slc17a4	-4.77696	0.328169	4.48519e-38	97	111	75	78	65	35	6846	6492	5989	5176	5626	5299	2440	2107	6382	2681	3388	3405				Inpp4a	0.136324	1.74393	6.75243e-34	492	480	523	377	495	417	922	854	848	686	714	796	467	494	614	239	199	191
Tmem236	-8.08753	0.514129	2.69987e-37	11	13	5	4	1	0	3754	4040	4293	5436	5300	4857	1227	1522	3615	3414	2855	2239				Slc6a14	0.611098	-9.3	7.63178e-34	71	94	152	201	292	271	1	0	1	7	2	0	200	212	200	2960	3170	2814
Fry	4.40953	0.326062	1.04544e-36	930	1060	928	591	710	576	181	176	163	115	120	123	93	141	456	60	78	148				Saa1	0.712873	-11.6019	4.02257e-33	0	2	0	0	1	0	1	0	0	0	0	1	1	0	86	796	753	594
Adgrg7	-10.9548	0.63182	1.96138e-36	8	1	4	1	0	2	6534	7227	6728	19375	18879	17843	12782	9161	13919	15258	16031	14914				Gm5843	0.747523	-11.6564	4.99117e-33	0	0	0	0	0	0	0	0	0	0	0	0	2	2	6	1335	1062	1021
Pcsk5	-8.02799	0.515531	2.9727e-36	10	13	0	10	9	1	4040	4585	3324	5094	5537	5267	913	830	2255	2065	1512	1470				Unc5cl	0.296713	3.91317	5.17925e-33	643	731	594	515	573	336	2063	2247	2162	2392	2407	2545	734	1142	1371	143	140	81
Cxcl17	13.1894	0.786367	3.55101e-36	4002	4352	3495	2542	3405	3851	0	0	0	0	0	0	0	0	1	0	0	1				Rbms1	0.166819	-2.11916	1.22751e-32	4296	3983	4819	3967	5319	4691	374	429	414	315	498	364	2415	1707	818	4051	3180	3071
Ctss	-7.74353	0.508497	4.72874e-36	3	0	2	1	0	1	1159	1486	1554	1478	1279	1364	401	641	1952	3575	3963	3924				St6galnac6	0.5253	-7.77895	1.61935e-32	20	17	8	23	11	2	58	71	79	40	19	19	132	104	108	15813	12195	10018
Fn1	8.89835	0.537197	1.068e-35	21609	16028	38044	13348	44915	43349	7	3	10	12	18	17	2138	765	340	3074	1734	1403				Pla2g10	0.342975	-4.46378	1.69283e-32	479	706	438	626	488	588	39	35	48	30	55	22	58	70	122	887	774	520
Akt3	9.00832	0.569292	1.71718e-35	1274	1066	1538	727	1068	1095	2	3	4	2	2	1	7	3	9	9	11	13				Tmem268	0.130267	-1.6205	4.41721e-32	479	504	464	470	500	452	921	951	885	911	986	1045	1480	1365	1408	3290	3146	3232
Defa24	-12.2271	0.760379	4.34718e-35	0	0	0	0	0	0	25113	34093	49660	30113	21801	25651	3151	7184	36905	3	33	38				Oat-rs1	0.230392	2.95857	8.46298e-32	134	128	167	117	113	119	1724	1947	2112	1499	1377	1649	163	300	1135	94	76	73
Rabac1	1.91444	0.147642	5.73699e-35	2835	2505	2671	2578	2642	2637	757	749	679	696	713	783	955	892	960	1522	1124	1171				Slc4a5	0.43632	6.05932	1.64985e-31	20	19	3	6	1	11	1886	1883	1668	1515	1352	1682	13	14	65	10	8	8
Slc9a3r2	4.02522	0.300056	7.34115e-35	869	885	798	718	977	876	93	105	77	39	57	66	75	85	105	71	42	46				Cpne2	0.279249	-3.49795	4.63886e-31	936	1020	1057	1159	1537	974	192	182	127	123	152	117	217	247	330	1558	1382	1778
Defa17	-11.8247	0.770156	1.31822e-34	0	0	0	0	0	0	9146	13539	17396	19034	14969	16958	1865	4304	19826	2	8	9				Anxa13	0.526503	7.59451	5.00498e-31	9	18	7	5	10	0	10871	13244	10855	18031	21455	18395	1980	3857	11658	39	32	20
Abcc2	-11.9668	0.695602	2.75709e-34	0	1	1	1	1	2	5015	4504	3749	16292	18377	16576	6738	5462	5239	114	57	31				Ldlrad3	0.339886	-4.31079	4.56736e-30	371	273	454	274	612	432	91	68	112	78	74	65	126	149	167	1991	1845	1375
Naip1	-8.02565	0.530775	3.43442e-34	5	16	8	44	22	11	3436	3684	3461	5514	5726	5328	8003	6530	6199	9501	7079	7648				Serpinb11	0.526572	-7.69076	5.20475e-30	251	160	427	402	190	380	2	1	0	4	11	4	1936	647	84	5818	4604	3966
Nexmif	8.40023	0.535361	3.97964e-34	1578	1626	1994	2042	2782	2370	2	5	8	6	2	2	7	12	11	7	6	4				Tlr1	0.392864	-5.2194	2.40672e-29	0	1	6	14	11	5	39	41	58	34	40	25	312	313	231	2135	2203	1779
Nr5a2	-9.13032	0.672707	1.0595e-33	0	0	0	0	0	0	1327	1276	1167	830	969	1044	326	549	1170	522	601	691				Stk39	0.405203	5.07697	2.11552e-28	2123	2174	2123	3264	3249	2924	2920	3263	3274	3138	3299	3735	2503	2651	1710	223	152	33
Dnah8	-5.5123	0.412414	1.65052e-33	6	3	7	9	4	6	523	373	321	255	325	274	357	483	383	366	318	242				Krt23	0.275092	3.28778	2.15855e-28	6232	6042	7030	6582	7051	6291	1209	1480	1521	1968	2416	1942	6191	3788	2871	438	241	262
Hsd17b13	-6.01623	0.423632	3.18864e-33	40	43	35	40	42	28	5182	5653	4806	5745	5188	6058	590	649	1274	77	180	248				1810065E05Rik	0.588389	-8.13755	2.25465e-28	0	1	0	0	0	0	46	59	40	109	64	68	85	64	1235	4553	7933	14136
Pde3a	-9.57012	0.642127	3.44993e-33	1	0	0	0	0	0	2674	2286	2528	1884	1872	2161	289	315	1147	2655	2163	1475				Ncf2	0.296286	-3.64213	2.48522e-28	0	0	0	1	0	1	37	47	34	29	42	47	143	156	202	356	422	485
Gna14	7.80066	0.542185	5.38769e-33	837	831	1738	953	1196	842	11	9	19	2	2	6	20	18	60	1588	2492	2742				Rgl3	0.371524	-4.60374	2.60834e-28	2582	2485	2399	1526	1447	1887	56	66	53	22	39	35	113	56	71	1189	1409	1133
Nrp2	3.70194	0.287289	3.69401e-32	1772	1730	1910	1960	1863	2015	100	122	176	96	118	96	234	346	201	3513	3119	2519				Erlin1	0.149822	1.75497	3.17315e-28	3017	2989	2994	2500	2198	2361	3375	3401	3192	2864	3022	3241	1063	1075	1093	1097	921	799
Fam114a1	3.11595	0.248557	4.21819e-32	2627	2471	2385	2002	1612	1828	494	539	581	478	530	559	335	338	791	798	639	562				Onecut2	0.49705	6.45753	4.35647e-28	3248	2276	2405	748	1684	1438	6674	6819	8176	3126	3220	3812	3416	2795	1020	69	59	53
Trim36	-4.26294	0.329648	6.62811e-32	33	40	22	38	33	39	504	465	508	683	649	696	274	337	260	1678	1532	1293				Exph5	0.192619	-2.2184	9.13282e-28	1180	1256	1136	927	783	831	726	862	1078	607	578	615	891	1100	1753	2346	2220	2140
Cdh17	-9.14904	0.575749	6.9271e-32	20	64	18	116	22	34	31446	32689	29811	49620	51653	49532	32707	29472	34982	36048	34704	36151				Igf2bp3	0.581904	7.63762	1.06171e-27	0	0	0	1	0	1	888	980	1531	746	766	1250	5	19	15	2	4	2
Atp8b2	4.79737	0.364706	8.65108e-32	1020	863	551	517	811	748	31	38	39	22	26	36	84	71	89	37	33	16				Cacnb3	0.132297	-1.52249	1.13356e-27	2434	2419	1929	2067	2675	2261	1133	1214	993	903	921	1028	2156	1984	2189	3617	2885	2754
Gmpr	5.20124	0.387049	9.60562e-32	683	550	736	739	827	727	17	12	14	7	5	14	75	50	35	21	29	33				Hsd3b3	0.386812	-4.88287	1.15192e-27	0	0	0	0	0	0	90	81	90	38	55	45	92	87	168	922	1148	1752
Ccdc141	3.74707	0.287817	1.17493e-31	4324	4343	5071	4841	4739	5263	164	167	215	207	262	230	224	345	155	128	93	96				Lgals2	0.594406	8.47246	1.45185e-27	275	798	172	740	108	96	36938	28551	24096	19095	23139	25194	9069	13186	22264	23	37	25
Ccl25	-3.41203	0.261962	1.84772e-31	191	167	178	133	153	140	9143	9846	11375	8594	8282	9511	488	896	4244	189	192	173				Gpr155	0.366794	4.5102	1.7468e-27	58	62	69	56	74	66	475	512	484	806	673	831	31	49	29	31	34	39
Slc26a3	-10.9943	0.745311	2.20872e-31	0	0	0	0	0	0	2416	2654	2319	4476	5016	5491	269	301	767	9100	7693	5123				Golm1	0.127411	-1.45083	2.72597e-27	54304	51676	40666	39733	46416	50983	15201	15453	14271	11219	12992	12762	13274	14226	15719	41496	34223	29980
Rab27a	3.98597	0.317388	3.56379e-31	3004	3392	2014	1885	1840	1755	342	395	442	195	229	234	240	315	466	413	309	277				Lcp1	0.313826	3.82291	3.9217e-27	2930	3509	3906	3033	2126	3313	1836	2120	2017	1333	1203	1386	489	881	905	68	118	59
Smad6	5.09956	0.393873	5.96093e-31	406	475	502	239	338	443	48	66	60	34	24	39	9	17	54	40	52	63				Rragd	0.503461	6.60542	4.97897e-27	789	613	425	388	446	472	1322	1475	1288	2015	1713	2352	43	45	307	4	8	6
Plcl2	-6.47969	0.473316	6.75317e-31	17	3	0	4	12	0	1632	1732	1648	889	906	1097	827	1113	1614	2051	1744	1826				Chpt1	0.217227	2.57589	5.40547e-27	1964	2580	1628	1777	1774	1953	3576	4188	4021	2868	2866	3411	459	944	2178	258	348	208
Dtna	8.16918	0.562763	6.97372e-31	983	822	1123	776	597	810	3	3	5	2	1	1	14	7	11	5	1	0				Dpyd	0.592236	8.032	8.94075e-27	0	6	1	5	5	3	3938	3955	4182	4340	3712	4519	40	179	864	0	5	5
Pitx2	-9.50617	0.653505	8.54017e-31	0	1	0	0	1	0	812	580	688	752	745	795	628	800	782	1	0	0				Defa30	0.595503	8.256	1.87797e-26	0	0	0	0	0	0	5856	8425	13169	13410	9040	10988	468	1055	7878	0	10	9
A1cf	-9.78649	0.6938	5.5505e-30	0	0	0	0	1	0	1413	1477	1581	1913	2022	2024	292	365	833	290	470	445				Moxd1	0.523677	6.7084	1.99545e-26	277	193	345	385	690	898	311	263	263	285	290	328	55	34	3	6	2	14
Clu	6.03428	0.43373	7.69542e-30	919318	885272	606546	333576	691525	833239	3775	4745	3857	3111	5258	2849	44915	30828	9615	22644	14241	12406				Syk	0.302773	-3.60128	3.14313e-26	242	292	187	308	464	371	284	242	205	218	353	232	1411	1198	1014	5397	4448	4008
Rsph9	5.58352	0.429465	1.28048e-29	320	323	314	285	267	270	25	15	16	7	10	8	14	10	34	18	20	4				S100a16	0.259228	-3.0328	4.90002e-26	2156	2256	1652	2529	3267	2462	713	780	634	898	1108	997	4269	2876	2018	17461	12056	9774
Tenm4	4.52189	0.346061	1.39728e-29	3454	2873	4615	3248	3874	3852	44	86	80	72	68	75	172	161	58	142	165	102				Tm4sf5	0.398157	4.80399	1.93856e-25	177	174	62	163	127	99	7756	9145	7875	11488	11888	11612	1538	2246	3738	338	221	196
Anxa13	-8.83301	0.574042	1.51404e-29	9	18	7	5	10	0	10871	13244	10855	18031	21455	18395	1980	3857	11658	39	32	20				Synj2	0.12862	-1.41321	2.81997e-25	2187	2411	2564	1965	2060	2119	1147	1212	1175	909	984	1138	1879	1794	1859	3544	2800	2642
Ttc39a	2.88064	0.239382	1.83521e-29	3865	4602	4010	3221	3125	3172	622	731	709	691	680	823	818	1145	1324	2919	2426	1902				Galnt12	0.155573	-1.70929	3.02273e-25	2323	2820	2732	2939	2587	2511	1223	1391	1264	1033	1136	1181	1739	1981	2463	3345	3372	3671
Basp1	6.28186	0.450169	4.41015e-29	6208	6053	6588	4305	6800	8019	11	19	16	24	40	20	433	179	80	218	144	76				Cbr2	0.680297	-9.41928	3.68846e-25	312	419	351	157	33	47	7	5	2	13	16	9	53	20	80	10279	14339	10130
Rgl3	5.48569	0.424464	1.36569e-28	2582	2485	2399	1526	1447	1887	56	66	53	22	39	35	113	56	71	1189	1409	1133				Golph3l	0.132409	-1.42745	1.7803e-24	3175	3104	3060	2962	3031	2740	3522	3257	2993	2771	3094	3140	2231	2447	3940	7586	6383	5917
Rbms1	2.33853	0.19553	1.4848e-28	4296	3983	4819	3967	5319	4691	374	429	414	315	498	364	2415	1707	818	4051	3180	3071				Hsd17b13	0.370593	4.3322	2.47439e-24	40	43	35	40	42	28	5182	5653	4806	5745	5188	6058	590	649	1274	77	180	248
Enpp1	1.99052	0.168887	1.61574e-28	4776	4486	4339	4065	3976	4844	963	926	896	895	936	1008	1190	1398	942	703	584	650				Epb41l3	0.631239	8.45464	3.05891e-24	0	0	0	1	0	0	7127	7497	7802	5721	5686	6669	69	633	2221	0	2	8
Gpm6b	6.97887	0.504153	4.47388e-27	1752	1402	1097	783	1159	1507	22	17	17	9	7	6	8	9	11	11	1	5				Fut2	0.315181	-3.42997	3.81049e-24	5173	5742	5164	5188	4182	5484	202	237	218	97	110	85	333	304	562	1052	1176	1361
Abhd11	-1.5123	0.133099	5.3198e-27	972	847	783	837	876	922	2539	2665	2347	2303	2597	2692	3411	3286	3239	2455	2303	2242				Slc17a9	0.457724	-5.48965	4.05216e-24	900	956	424	394	282	319	108	88	52	69	92	66	1756	996	1129	4715	3957	4608
Tmem63a	1.49421	0.131533	5.41904e-27	6320	7050	6219	6515	6315	5827	2496	2497	2334	1749	2077	2277	3480	3197	2929	4689	4130	3552				Cd9-ps	0.18366	-1.99039	6.5823e-24	3565	3693	3331	3682	4194	3841	645	805	669	810	941	904	1961	1955	1617	5142	4127	3491
Cited4	2.70062	0.23125	1.07573e-26	1103	985	1128	954	1361	1085	109	120	94	91	132	142	169	161	112	116	85	87				Abhd3	0.471511	5.6654	9.4427e-24	123	157	77	230	166	157	1739	2182	2145	2870	2572	2731	622	573	1069	15	31	56
Ckap4	4.03298	0.333362	1.10858e-26	4159	3845	5033	5654	6000	5463	196	214	150	158	252	217	805	573	548	1034	618	451				Casc4	0.298857	3.27898	3.25195e-23	1102	941	1195	1345	1538	1308	749	723	732	369	495	629	424	515	380	59	87	62
Akp-ps1	-9.67356	0.743785	1.84308e-26	0	1	0	0	0	0	1539	1607	1262	967	834	982	12	22	21	46	32	76				Marc2	0.163014	1.73378	3.50411e-23	2725	2756	3101	2930	3134	3345	14725	17865	17305	14424	13975	17009	3219	3473	4685	4786	4359	3551
Muc1	10.15	0.646669	5.13207e-26	39716	48594	41056	23615	28748	32936	26	39	44	3	2	2	3	10	7	174	459	171				Slc27a2	0.606456	7.76107	3.71658e-23	0	2	1	0	0	0	5956	6799	7413	1622	1718	2490	271	592	1137	1	7	6
Mpp2	4.60827	0.387874	5.49267e-26	760	777	813	548	808	675	107	90	71	43	53	66	34	16	76	41	67	39				Amph	0.678007	-8.38993	7.15542e-23	0	0	0	0	0	0	2	0	3	0	1	0	97	131	617	114	254	430
Armcx3	4.58289	0.379621	6.84339e-26	429	395	384	432	359	344	29	27	31	14	18	19	17	21	24	5	15	1				Defa28	0.631359	7.89414	1.20999e-22	0	0	0	0	0	0	1340	1863	2187	2289	1837	2172	231	472	2456	0	3	2
Pacsin3	3.31863	0.287506	9.52278e-26	1934	1929	1570	1308	1721	1601	180	226	151	119	130	134	202	287	162	469	384	360				Mecom	0.205821	-2.16739	1.54029e-22	7026	7763	4876	5513	6488	6065	841	934	1008	1042	1164	1015	2750	3069	2583	6290	5157	4590
Wtip	2.7631	0.244335	1.17129e-25	2553	2899	2553	2304	2691	2402	516	514	526	344	449	363	701	482	674	751	831	604				Tmem237	0.29915	3.32605	1.90942e-22	263	317	206	196	206	210	4557	5481	2684	2893	2343	2869	551	437	1920	169	145	137
Fndc3b	2.64629	0.235109	1.22877e-25	8214	8048	10252	6664	8634	8770	1903	2030	2146	1316	1510	1568	2316	1951	2629	2484	1857	1834				Car2	0.4165	-4.96068	2.2327e-22	24040	31069	14035	18012	13774	12649	601	896	654	1029	985	829	3741	1926	543	86561	72286	50864
Lpcat2	6.17546	0.499541	1.22877e-25	450	514	333	515	440	350	26	17	12	5	9	10	15	19	66	176	115	61				Boc	0.516236	-5.62973	4.76494e-22	175	134	68	29	29	26	34	43	36	45	27	31	64	115	423	472	914	1240
Sntb1	6.37425	0.487839	1.25266e-25	733	801	779	404	602	844	7	24	20	14	22	16	5	8	24	1	0	0				Hoxb9	0.671702	-9.01498	6.6254e-22	0	0	0	0	0	0	0	1	0	1	3	0	2675	2352	518	932	1601	2298
Setbp1	5.18212	0.454511	1.37689e-25	1872	1813	1908	1058	1161	1153	330	502	420	109	94	133	50	58	398	429	680	817				Tfcp2l1	0.331708	-3.51537	9.67542e-22	3155	4163	2123	2301	2199	2036	585	735	862	292	473	437	755	698	763	6068	5718	5516
Reg4	-10.2438	0.752232	1.395e-25	0	0	0	0	0	0	5962	6505	10068	3531	3257	3457	2623	5832	19429	940	697	189				Hoxa5	0.539469	-6.4642	9.70241e-22	0	0	0	0	0	0	7	9	7	17	9	16	3	15	62	609	597	384
E2f2	-4.16177	0.356069	1.72464e-25	50	67	78	50	95	70	1120	993	833	952	1371	1399	741	1240	836	1290	945	1037				Ly6g	0.569466	-7.81389	9.74079e-22	2	4	1	28	25	8	18	24	11	16	30	16	1994	662	237	17078	14387	15671
Malrd1	-8.97434	0.692633	1.72464e-25	0	1	0	0	0	0	2495	2902	3329	2045	1794	1992	390	691	3184	104	106	246				Dcxr	0.264339	-2.77066	1.28895e-21	4358	4495	4963	3019	3441	3679	733	961	627	843	873	940	1302	983	1064	7234	7324	5177
Btbd11	4.56286	0.374177	1.9971e-25	626	658	586	989	1191	926	3	8	8	12	7	12	130	82	29	1129	816	761				Tgm3	0.618261	-11.5738	1.35152e-21	4	2	1	4	0	1	3	0	0	0	2	0	2	1	1	7340	6661	3552
Arhgap31	-5.14166	0.435429	2.6241e-25	8	2	4	14	6	4	243	294	299	298	322	323	429	413	567	334	187	169				Abcc2	0.599277	7.00865	1.81655e-21	0	1	1	1	1	2	5015	4504	3749	16292	18377	16576	6738	5462	5239	114	57	31
Myb	-6.02177	0.473828	2.82582e-25	24	25	47	75	53	21	5685	5105	5271	2868	3012	3775	2255	3782	3582	3466	3062	2455				Tmem184a	0.140337	1.43206	2.62519e-21	2622	2668	2233	1791	2050	1969	3208	3329	3037	2924	2899	3243	1459	1559	2515	973	871	747
Aldh3a1	12.1298	0.738337	3.46977e-25	22443	23164	6452	6040	4161	8936	0	0	0	0	2	2	18	20	16	15	9	2				Sgsm3	0.122051	-1.22648	6.13634e-21	4664	5253	4276	4836	5353	4495	1210	1351	1291	1319	1521	1514	3758	3958	2419	5524	4335	4336
Ppp1r14d	-6.05109	0.475111	3.53114e-25	34	26	18	23	22	17	1542	1800	1604	3164	3421	3099	1450	1538	2593	2871	2629	2292				Pitx1	0.6198	8.06152	1.05036e-20	1045	1598	664	883	842	2084	668	662	687	440	591	569	636	782	576	0	3	0
Timp2	3.95021	0.330264	3.99957e-25	5247	4858	5460	4674	7426	6760	95	166	103	88	137	98	1501	835	308	1462	1072	691				Pls3	0.175937	-1.76498	2.03813e-20	6019	5133	5208	4750	6284	6389	873	958	844	981	1185	1151	5138	4100	3021	6205	4894	4523
Ffar4	3.52011	0.311417	5.03731e-25	1653	1687	2098	1213	1469	1616	260	271	225	138	195	173	384	350	486	463	535	675				Stim1	0.170056	-1.68758	2.14574e-20	1097	1279	1048	1222	1140	941	2085	1999	1737	1428	1503	1667	1600	1657	2098	5441	5523	3828
Rab3d	2.39604	0.21819	5.24983e-25	7243	8860	6813	7356	7262	7288	2797	3037	2897	1938	2228	2526	1361	1683	2693	3937	3254	2152				Cyp4v3	0.334036	3.62162	2.24294e-20	420	372	174	232	214	238	2451	3100	3502	3480	2647	3054	142	145	618	129	96	106
Cryz	2.50581	0.227697	1.03726e-24	907	846	974	743	787	790	214	250	169	187	182	154	156	166	190	1179	1092	931				Tlr2	0.389402	-4.24882	2.69184e-20	19	21	7	33	26	13	66	89	72	47	55	47	230	206	176	1016	1638	1522
Pla2g16	2.26094	0.207213	1.09122e-24	2450	2525	2434	2414	2866	2617	899	1156	1091	703	681	796	801	999	1397	635	558	448				Ugt2b35	0.508959	5.9751	3.66263e-20	1901	1606	802	670	273	349	5255	5378	5572	3495	3813	4185	1891	2409	2751	37	50	32
Gm45912	-9.05602	0.75023	1.17581e-24	0	0	0	0	0	0	2004	1837	2629	689	719	994	219	398	898	436	357	372				Fam124a	0.52045	-6.00414	3.87586e-20	37	36	28	8	16	26	1	3	6	3	3	4	8	5	10	224	245	186
Arhgef3	2.03298	0.184903	2.39476e-24	3223	3113	3445	3192	3431	3193	372	404	347	433	475	415	2093	1525	879	2106	1500	1303				Abo	0.620308	-7.84825	3.90055e-20	139	165	65	208	124	137	0	0	0	1	2	2	28	14	7	793	663	653
Defa30	-10.9048	0.800006	2.72215e-24	0	0	0	0	0	0	5856	8425	13169	13410	9040	10988	468	1055	7878	0	10	9				Tprkb	0.133562	1.31008	6.26694e-20	706	777	620	725	823	691	2101	2189	2216	1551	1598	1769	900	1085	1175	732	678	657
Ang4	-10.6351	0.736309	4.20122e-24	0	0	0	1	0	0	3495	4054	5142	10463	7764	9685	995	2607	9191	2427	2987	2052				Hoxaas3	0.484208	-5.34778	6.42461e-20	0	0	0	1	0	1	15	16	13	18	17	26	7	23	76	298	290	526
Crtap	2.12339	0.19634	4.49929e-24	1024	963	998	966	1199	1136	294	326	324	228	224	261	341	441	395	413	376	402				Cmah	0.732232	-9.9013	7.36619e-20	0	0	0	0	0	1	0	0	0	0	0	2	0	1	9	484	473	346
Sh3bp1	5.66764	0.474785	4.51195e-24	795	743	815	372	583	679	70	34	46	14	20	28	9	23	41	3	7	3				Anpep	0.534638	6.72134	8.90093e-20	3392	3721	6465	2927	1795	4299	4109	4878	7470	6211	6194	5795	53	179	1950	11	20	5
Kank1	-3.46032	0.306124	4.69983e-24	49	71	81	96	119	71	1521	1671	1617	1241	1171	1388	839	1062	1522	1477	1349	1306				Fam234b	0.57533	7.01772	1.08241e-19	58	48	12	9	7	8	5424	5667	5730	2219	2125	2887	45	145	1142	1	8	2
Pde8a	5.60636	0.447239	4.88019e-24	846	956	635	771	785	853	46	50	54	30	19	27	2	7	11	6	12	14				Cd38	0.182973	-1.76793	1.56868e-19	907	968	956	982	731	1081	4836	4674	4349	2932	3293	3780	2032	2267	4713	8830	8646	7951
Atoh1	-8.02313	0.720681	6.09649e-24	0	0	0	0	0	0	625	620	767	343	346	386	382	708	1390	168	165	110				Nfe2l3	0.347632	-3.5455	1.61641e-19	3183	2670	3535	2932	3764	3888	30	30	32	18	26	14	71	46	50	623	387	256
Prom2	6.69936	0.542879	6.34429e-24	348	466	433	461	374	344	0	6	0	6	7	3	31	14	40	51	59	30				Fzd1	0.498925	-5.38324	1.84763e-19	869	693	988	501	925	1015	31	47	77	14	13	16	87	43	74	1776	1551	1466
Insyn1	4.20616	0.370172	6.87966e-24	456	403	286	239	387	370	16	23	29	27	23	25	37	46	50	68	65	84				Sipa1l2	0.161509	1.55882	1.84763e-19	674	888	572	830	765	748	1363	1395	1492	1279	1378	1619	1317	1338	938	763	611	560
Ms4a12	-7.72586	0.648902	6.87966e-24	0	1	0	0	0	0	437	463	479	374	335	395	93	138	301	494	449	342				Fn1	0.495558	-5.58066	2.3925e-19	21609	16028	38044	13348	44915	43349	7	3	10	12	18	17	2138	765	340	3074	1734	1403
Tmem41a	-2.09502	0.194631	9.07173e-24	271	300	280	287	331	230	1248	1204	1243	1243	1386	1350	752	851	842	641	527	534				Gm5609	0.737214	-7.75986	2.82481e-19	195	172	203	190	161	193	0	0	0	0	0	0	6	5	2	150	142	178
Bcas1	4.42799	0.391306	9.90659e-24	5893	7042	3376	6871	6740	5674	651	593	785	295	397	349	798	690	1524	366	339	363				Ttc39a	0.205279	-1.96873	3.86336e-19	3865	4602	4010	3221	3125	3172	622	731	709	691	680	823	818	1145	1324	2919	2426	1902
Bik	3.99886	0.36644	1.89727e-23	198	219	160	125	177	119	21	30	32	13	11	29	32	65	90	83	100	82				Igfbp4	0.470422	5.28206	4.54566e-19	1821	1798	1558	1483	1314	885	7875	8589	7357	2091	1963	2435	6074	7059	9099	68	85	57
Vtcn1	6.17727	0.488675	2.03707e-23	4657	4552	3696	3130	4561	5425	30	55	36	30	30	32	126	112	72	109	61	13				Steap4	0.728812	-8.41343	5.68689e-19	97	42	138	9	38	51	4	4	14	0	0	0	5	12	13	2105	2614	2171
Muc3	-10.6336	0.698022	2.17881e-23	0	0	0	0	4	2	5898	5320	2731	13180	13045	11755	2215	1450	6296	13933	10065	13611				Cd302	0.497504	5.38811	7.17532e-19	3	4	7	1	2	1	831	871	909	484	522	600	9	37	92	0	10	5
Pla2g10	4.42943	0.394926	2.81552e-23	479	706	438	626	488	588	39	35	48	30	55	22	58	70	122	887	774	520				Ctss	0.266699	-2.60332	7.29077e-19	3	0	2	1	0	1	1159	1486	1554	1478	1279	1364	401	641	1952	3575	3963	3924
Lemd1	9.19017	0.770651	3.22096e-23	1437	1331	1398	958	1040	1338	0	0	0	0	0	0	135	71	14	68	40	40				Aldh18a1	0.24009	2.31814	8.16098e-19	3929	3588	4186	4762	4101	3594	11380	11179	11694	14367	15329	17688	7163	7372	6587	3800	3317	3014
Defa28	-9.34482	0.785225	3.94027e-23	0	0	0	0	0	0	1340	1863	2187	2289	1837	2172	231	472	2456	0	3	2				Agmat	0.683703	8.11343	8.44304e-19	0	0	0	1	0	0	934	901	900	843	827	1082	37	144	184	0	3	0
Clrn3	-7.23286	0.553087	4.06362e-23	7	24	7	18	1	4	2153	2454	2491	3818	3480	3487	1289	1446	2112	2331	2295	2027				Kctd17	0.423974	-4.29199	1.003e-18	199	273	312	203	197	334	41	40	51	13	18	13	8	17	26	450	363	387
Cldn15	-9.23183	0.627862	5.26381e-23	0	6	1	24	6	8	13690	14702	14712	18726	17496	20261	3571	5163	13446	5736	7592	8665				Cd9	0.198359	-1.90487	1.14382e-18	9466	10451	8651	10427	11829	10706	1880	2228	1818	2337	2522	2587	5642	5342	4639	13744	11001	9006
Alcam	2.77619	0.258317	7.17823e-23	22420	22651	17833	13747	15576	16786	2986	3127	2875	2232	2434	2256	3653	2891	2690	4565	3273	3152				Abcc4	0.14277	-1.36206	1.19684e-18	4364	4112	3980	4366	4130	4591	895	1081	1136	960	1359	1129	3993	3278	1878	5489	4372	4376
Agmat	-9.08156	0.768908	8.24994e-23	0	0	0	1	0	0	934	901	900	843	827	1082	37	144	184	0	3	0				Prnp	0.335995	-3.37437	1.23516e-18	776	610	682	571	773	654	190	262	310	120	162	129	828	467	446	2855	2714	2263
Hbegf	2.14714	0.202263	8.48225e-23	3185	2800	3035	2828	3672	3838	542	653	542	447	571	508	1347	1176	910	1699	1239	1067				Ephb6	0.472421	-5.18095	1.2814e-18	138	110	57	107	167	151	7	15	0	3	7	6	353	173	61	949	580	506
Dnajc10	2.24385	0.21158	8.71711e-23	17464	15990	19553	21582	22515	16660	3203	3775	3554	3406	3750	3981	4163	4306	4003	5143	4626	3879				Bche	0.345032	3.75936	1.49324e-18	587	662	437	360	304	268	7723	7608	8233	6388	5964	6997	24	62	267	106	113	254
Tm4sf5	-5.32117	0.445987	1.15436e-22	177	174	62	163	127	99	7756	9145	7875	11488	11888	11612	1538	2246	3738	338	221	196				Atp7b	0.324305	3.26288	1.53507e-18	3376	3421	5310	2985	3017	3157	1768	1992	1695	1639	1737	1901	321	444	455	290	141	107
Casp1	-7.29091	0.558747	1.41587e-22	4	15	2	17	26	1	3868	4023	4050	3348	3597	3930	1737	2013	3796	3888	4113	4009				Paqr5	0.311495	-3.01249	1.62577e-18	3590	3645	1918	1574	2005	2019	479	518	369	479	392	395	374	295	464	3169	2772	3096
Clca3b	-7.76884	0.573332	1.44879e-22	28	54	99	98	25	48	47837	44298	51158	12049	15188	19568	17569	25917	20800	3781	3581	4090				Bmp7	0.515645	5.64793	1.93041e-18	421	530	641	812	989	725	870	975	877	587	554	649	47	175	305	2	12	7
Sh3pxd2a	4.08412	0.371842	1.59776e-22	4302	3836	3576	2774	3950	3808	301	393	476	160	205	212	528	526	570	1007	1279	776				Gne	0.259753	-2.4877	2.27349e-18	2621	2732	3173	4487	4033	3171	2989	2919	2681	2185	2441	2496	3130	3677	5229	15402	12890	11641
Gabarapl1	1.92674	0.184504	1.91269e-22	3239	3001	3194	2642	2606	2923	677	848	905	600	683	690	1566	1552	1211	1171	1044	1022				Depdc7	0.270607	2.60859	2.34676e-18	294	286	211	420	403	376	1002	1201	895	989	953	966	769	699	829	199	165	163
Tmem123	1.87768	0.180621	2.30579e-22	4016	3846	3609	3304	4021	4190	1281	1224	1376	882	928	1002	1330	1396	1245	1693	1339	1246				Fbp1	0.681694	8.16515	2.95395e-18	13	29	5	2	12	5	1684	1997	1671	2696	2541	2503	50	77	384	1	4	0
Mecom	2.53074	0.239803	2.45283e-22	7026	7763	4876	5513	6488	6065	841	934	1008	1042	1164	1015	2750	3069	2583	6290	5157	4590				Apob	0.673668	7.7625	3.31821e-18	2716	4695	2142	4251	18594	15515	20186	20788	21842	75148	70445	66809	11505	9086	15476	271	79	77
Hmgcll1	4.60104	0.416711	2.87387e-22	350	274	318	446	532	371	0	0	0	8	3	10	440	313	89	1529	1193	1479				Mfap3l	0.566929	-6.39995	3.43947e-18	93	76	149	229	445	338	6	10	5	2	13	6	1112	632	666	1616	1045	1293
Igf2bp3	-9.34027	0.740324	2.8991e-22	0	0	0	1	0	1	888	980	1531	746	766	1250	5	19	15	2	4	2				Gsdmc2	0.907295	-10.2013	4.00321e-18	4	34	1	0	0	0	4	1	4	5	4	8	1	19	257	10144	21869	22346
Slc7a9	-7.97736	0.617458	3.69915e-22	2	1	3	0	3	5	1329	1537	1411	2573	2668	2585	136	282	621	16	29	12				Slc35a1	0.261273	-2.49247	5.59965e-18	1354	1491	1058	1985	2019	1779	1307	1423	1336	864	953	1125	1935	1960	2141	7374	7135	6134
Reep5	2.58718	0.246355	4.41011e-22	3081	3009	2837	3004	4111	3228	552	655	707	405	501	432	933	775	833	1318	1105	1066				Tlr4	0.337131	-3.33447	5.82252e-18	1413	1611	898	1234	1019	917	57	150	95	124	130	113	1216	1008	623	1960	1572	1695
Slc5a1	-10.8325	0.67817	6.05849e-22	2	3	6	11	0	6	16882	20758	20120	84970	69481	77907	1990	3326	12023	1936	2437	1942				Slc7a9	0.529718	5.73922	6.31407e-18	2	1	3	0	3	5	1329	1537	1411	2573	2668	2585	136	282	621	16	29	12
Rap1gap	3.90311	0.369365	6.11393e-22	11476	12501	13420	11788	7653	7672	2993	3168	2309	1067	1296	1439	1009	1285	2828	355	425	306				Sike1	0.127603	-1.1775	7.70574e-18	1694	1525	1472	1372	1414	1533	1377	1377	1355	1058	1087	1149	1723	1757	1579	3511	3057	2400
Pld3	2.01618	0.195661	6.44596e-22	3903	4005	3480	2883	4016	3633	1317	1248	998	885	1058	1009	921	753	960	1300	1186	1080				Ccnjl	0.468163	4.6854	9.04307e-18	50	46	37	24	41	40	355	327	336	162	170	244	42	117	200	3	5	4
Gm8979	-10.413	0.772549	6.97644e-22	0	0	0	0	0	0	16154	14492	16491	2258	2572	3845	516	997	4302	1296	1125	1263				Sema3c	0.296168	-2.87634	1.00107e-17	7221	7074	5528	5730	6407	5994	430	521	493	693	880	662	6816	3963	3325	9411	7596	5701
Kcne3	2.83554	0.273514	1.01651e-21	11314	10057	8611	6344	9020	9305	2108	2274	2504	1846	1841	2110	1147	2235	2259	544	525	709				Pitx2	0.700236	9.17058	1.28556e-17	0	1	0	0	1	0	812	580	688	752	745	795	628	800	782	1	0	0
Ttc9	5.48537	0.455684	1.09432e-21	4632	4134	4071	3774	5876	5718	11	30	20	57	65	39	368	288	138	474	303	344				Slc19a1	0.178	1.64271	1.42299e-17	1154	1012	1297	1276	1122	1180	3407	3805	3324	3065	2527	3240	1768	2305	1807	1269	1062	1018
Rbms3	4.73394	0.417224	1.359e-21	1313	1132	1833	1295	1650	2117	54	71	76	50	48	69	32	71	54	6	0	4				Fam69b	0.193745	-1.78866	1.70692e-17	249	201	186	205	216	215	120	161	110	89	109	95	188	173	184	409	407	381
Slc39a5	-9.59388	0.741172	1.66163e-21	1	0	0	0	0	0	4088	4102	2738	3859	4305	4559	51	160	879	1016	1082	419				Gpd1	0.493625	5.28952	1.76068e-17	2465	2589	2051	1066	1737	2495	8570	9681	9025	23586	21975	24498	1472	2367	3888	357	260	278
Mep1a	-7.92298	0.609849	2.01309e-21	0	0	1	2	0	0	1759	1950	2060	1637	1891	1654	176	261	1891	3051	4510	3081				Mctp2	0.13692	-1.24301	1.91726e-17	1068	1014	1015	986	1110	1027	887	965	971	699	759	755	1079	1023	1649	1890	1551	1406
Tmem43	1.59224	0.156075	2.70055e-21	5748	4956	5391	4875	6046	5758	892	933	964	873	1064	942	3315	2401	1365	3001	2260	1941				Podxl	0.494695	5.11218	1.96794e-17	5025	4528	7258	6192	11527	9984	553	387	392	313	261	226	149	81	170	10	7	9
Cldn3	-5.27973	0.462254	2.7151e-21	195	166	179	387	412	145	7191	8045	7055	10363	11570	11043	10942	9346	11308	14082	11440	10691				Arhgap35	0.119864	-1.08993	2.48881e-17	3900	3576	3606	3278	4597	3633	3592	3756	4014	2950	3126	3336	4451	4363	4017	9316	7867	7511
Ctf1	3.63062	0.354792	2.87104e-21	378	360	300	191	226	238	149	181	117	66	54	73	17	38	101	31	32	27				Pam	0.286157	-2.72786	2.87878e-17	5535	5350	5209	3887	4928	7006	1011	1241	1301	903	884	736	3601	2302	1546	12060	10139	8592
Sema3f	6.71553	0.55685	3.38603e-21	7676	7097	9261	5772	7082	7642	196	196	170	26	59	38	51	46	109	78	35	49				Msi1	0.646068	7.19098	3.03727e-17	32	18	5	11	39	21	1437	1394	1769	633	668	781	130	409	804	3	0	3
Slc9a4	4.25327	0.381177	3.44469e-21	14694	15340	8511	10519	10212	9609	295	299	259	371	356	281	1612	850	561	1769	1331	854				Gimd1	0.6989	7.63639	3.64003e-17	0	0	0	0	3	0	516	563	616	939	1178	1212	96	293	335	0	2	3
St8sia6	10.598	0.653474	4.09067e-21	5763	4713	3272	10107	12267	5828	3	3	3	0	3	0	1	3	5	0	1	0				Tnip3	0.476301	-5.07198	3.8454e-17	2177	1413	1968	1904	3747	3630	19	33	12	39	80	36	532	266	186	4341	3039	2240
Mindy1	1.58259	0.158252	5.20035e-21	5074	5279	4810	4465	5412	4941	2417	2376	2270	1575	1897	1939	2018	2172	2383	4244	3364	2763				Fmo4	0.531593	5.60866	4.05769e-17	9	9	1	9	2	4	619	603	787	869	884	986	20	41	95	7	13	3
Mettl21a	1.67096	0.166916	5.84769e-21	812	759	662	670	743	715	285	360	281	232	275	253	248	235	275	513	484	400				Slc25a15	0.303294	2.85962	4.05769e-17	656	743	754	860	852	884	5955	6269	5794	8718	8096	9214	1372	2157	2272	1121	945	937
Marc2	-1.93161	0.190829	6.82923e-21	2725	2756	3101	2930	3134	3345	14725	17865	17305	14424	13975	17009	3219	3473	4685	4786	4359	3551				Unc119	0.1934	-1.75203	4.05769e-17	532	466	427	333	404	413	269	279	301	162	201	242	215	196	278	712	733	538
Zbtb4	2.33377	0.233735	7.78606e-21	2652	2465	2061	1556	1897	1953	1113	1086	1080	641	721	818	693	535	1262	1279	1301	1317				Mir196a-1	0.776378	-8.03061	5.25994e-17	0	0	0	0	0	0	0	0	0	0	0	0	85	80	26	159	212	192
Utp14b	-1.6679	0.168074	9.04186e-21	394	440	386	476	558	540	915	1019	943	947	956	953	1463	1326	845	1771	1617	1623				S100a1	0.213111	-1.94797	6.18043e-17	1436	1507	1578	1837	2118	1644	462	489	516	561	489	533	462	390	463	2633	2217	2024
Onecut3	7.07569	0.536467	1.0009e-20	1706	1582	1609	993	1191	1122	31	32	25	6	5	10	2	6	5	1	0	0				Dpp4	0.611303	7.21268	7.37312e-17	36	92	67	20	66	34	4018	4105	3861	4983	4260	3749	27	247	1653	1	9	6
Bmp3	-9.79413	0.750312	1.19107e-20	0	0	0	0	1	0	6935	6736	7615	1351	1619	1821	458	489	1773	509	379	628				Epb42	0.500006	4.79609	7.37312e-17	6	4	4	4	5	1	121	148	141	114	114	170	17	40	21	3	7	3
Lrfn1	3.56556	0.343282	1.32065e-20	240	228	198	172	240	251	37	41	37	24	18	26	25	32	42	16	23	22				Gm11771	0.633309	-7.28023	7.49482e-17	34	71	33	14	6	14	5	3	1	6	7	12	21	15	14	1315	1934	1325
Plekhs1	4.50873	0.38983	1.98841e-20	7312	6345	7087	6237	10084	12756	20	48	30	50	94	61	1840	1007	161	1294	930	779				Reep6	0.313327	2.93327	7.83769e-17	1418	1531	1878	1695	1987	1813	5957	5536	4884	7836	8259	9525	1832	2173	2293	1312	947	842
Zfp9	4.18305	0.396097	2.18247e-20	336	256	217	274	212	167	25	17	26	23	27	21	24	29	53	10	10	6				Ano6	0.1872	1.68467	8.52022e-17	3620	3344	4037	3457	4885	4018	8064	8596	8104	8747	10408	9979	4259	4215	3687	4083	3145	3465
Snhg18	4.31126	0.461029	2.1962e-20	575	537	484	208	225	223	543	568	526	155	143	191	1	0	12	60	120	124				Rasgrf2	0.564061	5.8016	1.10396e-16	37	68	48	263	59	61	1349	1435	1348	1416	1440	1411	760	727	725	15	29	20
Vamp5	4.17142	0.378707	2.38221e-20	1097	1035	657	825	1087	949	14	19	33	33	31	24	106	71	39	25	23	20				Mnx1	0.41937	4.0184	1.24246e-16	232	209	199	188	302	326	272	288	350	198	160	179	108	193	260	15	5	9
Epb41l3	-10.1447	0.782585	2.46087e-20	0	0	0	1	0	0	7127	7497	7802	5721	5686	6669	69	633	2221	0	2	8				Neu3	0.509784	5.38697	1.74415e-16	50	46	65	40	42	68	755	805	505	1346	1166	1546	19	15	55	16	15	15
Abcb1a	-5.3669	0.466611	4.40338e-20	94	64	104	29	82	123	4565	5096	5094	6563	7400	7031	6544	10087	15212	24690	19988	18928				Ndrg2	0.384557	-3.54805	1.80863e-16	1790	1634	1590	1189	828	1025	2049	1824	842	1171	1298	1501	2187	1430	5960	13044	11006	6701
Acta1	-4.40996	0.402057	4.69483e-20	3	11	16	17	4	5	992	1185	1472	811	948	1032	204	402	1622	855	1244	991				Kcnk10	0.543574	5.97383	1.98248e-16	452	625	281	391	313	246	527	564	566	582	553	653	1	11	26	3	8	0
Aqp5	9.342	0.548761	5.13088e-20	49559	45735	96068	80780	87325	90704	40	87	43	24	28	38	7	6	1	0	1	0				Satb2	0.431537	-4.27601	1.9909e-16	47	64	76	96	80	94	144	121	170	241	314	296	437	465	784	4676	4296	4608
Abi3	-5.91011	0.516538	5.13811e-20	1	12	3	16	9	2	1136	1258	1070	579	563	600	965	1045	1392	647	657	435				Skap2	0.187319	-1.65554	2.38218e-16	2096	2048	2464	1959	1874	2187	1481	1627	1518	1495	1679	1583	1112	1156	1926	4330	4024	3656
Adh6a	-11.0007	0.777893	5.13811e-20	0	0	0	1	0	0	6801	7574	7208	19691	17969	18114	355	445	5723	50	68	36				Galk1	0.21962	1.98782	2.42423e-16	1851	1608	1722	1645	1461	1452	2750	3150	2232	1664	1833	1928	1096	1091	1097	474	568	522
Gcg	-8.092	0.75339	5.13811e-20	0	0	0	0	0	0	1277	1032	1947	992	571	599	413	688	3259	45	78	95				Mttp	0.553984	6.32592	2.64761e-16	858	760	441	294	381	551	23512	25887	22845	66716	66418	65836	279	657	3880	208	214	171
Spdef	4.2114	0.416338	6.69332e-20	2348	2674	3580	3805	4290	3503	780	754	921	366	461	533	232	457	1558	168	192	133				St3gal3	0.320439	-3.01196	3.95315e-16	314	219	300	240	531	481	535	513	397	350	372	449	1231	949	801	4903	4939	4680
Ltbp4	5.43968	0.504733	6.98619e-20	6934	6466	4190	2032	2862	3225	350	369	376	100	104	125	250	194	549	336	292	212				Wnt3	0.595114	5.80257	4.00229e-16	0	0	0	0	1	0	165	227	275	283	286	321	177	324	521	3	2	2
Cpne2	3.26659	0.323865	7.74425e-20	936	1020	1057	1159	1537	974	192	182	127	123	152	117	217	247	330	1558	1382	1778				Bspry	0.184739	-1.65247	4.12034e-16	2030	2215	2131	2607	2607	2433	2098	2408	2124	2497	2938	2791	5463	6359	4271	13196	10137	10275
Dpyd	-7.26414	0.580861	1.2883e-19	0	6	1	5	5	3	3938	3955	4182	4340	3712	4519	40	179	864	0	5	5				Mgat4b	0.181259	-1.60118	4.27963e-16	3951	3972	2814	3153	3791	3044	4100	4485	4056	4018	3857	4474	7402	5705	7366	12192	12474	13238
Fabp2	-8.18734	0.617464	1.7408e-19	4	19	4	16	18	9	4383	5393	5095	11746	11390	12383	406	598	1017	111	419	271				Nlrc3	0.571532	5.38503	4.2989e-16	245	293	152	134	240	141	166	152	91	523	473	501	113	90	11	29	9	11
Rgma	5.34304	0.489242	2.09615e-19	676	482	406	147	320	380	20	23	18	13	14	19	19	22	38	3	4	1				Slc5a11	0.904892	9.25537	4.61326e-16	0	1	0	0	0	1	110	155	166	485	383	447	4	4	0	0	0	0
Mmd	-6.36682	0.559279	2.2841e-19	1	0	2	10	9	3	990	888	938	462	468	516	417	617	653	224	299	372				Angptl8	0.369061	3.31309	5.86514e-16	71	64	84	91	59	51	88	80	92	113	132	118	102	80	52	20	17	11
Fxyd3	3.38471	0.33491	2.44513e-19	10440	11240	9294	10427	12219	13138	1471	1552	1638	728	865	805	1669	1656	1532	1263	1037	1130				Acpp	0.489418	5.0705	5.91071e-16	30	23	4	5	7	3	2306	2295	2190	978	990	1184	233	482	1151	18	17	11
Pdss1	-3.2688	0.323761	2.79627e-19	140	182	198	279	255	236	3027	2605	2307	2012	2178	2687	872	1369	1252	1053	907	945				Atp2a3	0.294098	-2.54742	6.38548e-16	3531	4469	3203	2746	2127	1977	5535	5075	4969	2403	2728	2730	2558	2642	8848	13071	9386	8258
Zc3h12d	-4.11821	0.395312	2.90602e-19	12	13	8	1	4	3	452	508	375	326	378	394	90	153	347	360	450	511				Mov10	0.193239	1.70358	6.5924e-16	499	448	338	284	410	426	1217	1181	1187	941	1198	1124	604	534	604	434	307	325
Ltf	9.06891	0.645538	3.0356e-19	31242	25278	25668	2036	5985	17553	29	26	31	8	18	15	29	17	18	4	20	7				Mrps31	0.124539	1.08399	6.94276e-16	845	954	760	938	795	833	1978	2134	2152	1870	2033	2148	1356	1528	1624	1064	939	866
Muc6	13.0877	0.661908	3.48014e-19	29149	30011	59664	36572	40600	27562	1	0	1	1	0	2	2	2	0	0	1	2				Iqsec2	0.153835	-1.3227	7.20022e-16	797	734	707	523	499	656	968	944	837	633	737	738	454	484	1061	1308	1182	1131
0610040J01Rik	1.01855	0.107288	3.57093e-19	3715	3891	3463	3783	3867	3770	2131	2328	2046	1928	2053	2249	1720	1913	2002	3264	2953	2773				Hsd11b2	0.458548	-4.18287	7.96583e-16	186	207	115	30	51	59	178	186	108	102	137	141	31	55	127	1439	1491	1263
Sidt1	2.85769	0.296506	4.47216e-19	2037	2249	1618	1386	1159	1307	624	535	615	325	428	462	565	706	1133	534	868	818				Gsdmcl-ps	0.763008	-10.5064	8.73021e-16	0	0	0	0	0	0	0	1	0	0	0	0	0	2	1	503	935	980
Abhd11os	-7.58017	0.615621	4.62369e-19	1	5	0	8	8	3	873	1111	838	2218	2162	2063	991	702	1672	1717	1941	1349				Npnt	0.323033	2.81224	1.16703e-15	4340	3947	6930	6067	10168	8977	552	618	468	533	947	739	4494	2909	1000	438	183	179
4930452B06Rik	6.67691	0.537353	4.75036e-19	408	367	366	336	363	370	7	6	5	0	4	1	0	0	0	0	1	1				Akp-ps1	0.394695	3.81141	1.22804e-15	0	1	0	0	0	0	1539	1607	1262	967	834	982	12	22	21	46	32	76
Ddit4l	4.3076	0.399707	6.23282e-19	1239	1109	1201	843	1531	1711	16	31	32	23	31	23	213	132	62	56	53	23				AC113125.1	0.368587	3.39351	1.27768e-15	315	379	426	371	240	382	251	267	275	159	156	195	57	123	132	20	13	9
Slc4a5	-5.18188	0.451832	6.64151e-19	20	19	3	6	1	11	1886	1883	1668	1515	1352	1682	13	14	65	10	8	8				Zbtb7c	0.557544	-5.35669	1.53089e-15	349	570	250	144	239	358	7	8	11	3	0	1	31	13	27	241	224	252
Lurap1	3.07549	0.316414	7.43428e-19	376	333	378	264	270	308	106	92	108	54	42	64	86	86	148	21	21	14				Gnpnat1	0.175243	-1.51798	1.60167e-15	499	530	388	553	569	489	469	504	461	411	466	406	678	736	763	1614	1403	1076
Ceacam18	-9.14051	0.734276	9.74084e-19	0	1	0	0	1	0	891	863	739	1921	1939	1662	165	125	466	340	406	336				Oaf	0.240072	2.13017	2.0781e-15	1579	1368	1762	1152	1640	1976	531	560	614	454	502	511	257	304	394	123	83	108
Neurog3	-6.20718	0.579257	1.13692e-18	3	4	0	1	1	0	331	373	362	187	254	325	56	170	161	22	13	13				Wnk2	0.296734	2.73217	2.85897e-15	3354	3630	5309	3831	2861	2955	4097	4230	3377	2383	2513	3353	519	1030	1381	315	261	367
Ms4a18	-9.35286	0.716485	1.37774e-18	1	0	0	1	1	0	1513	1543	1428	3181	3243	3001	463	859	2081	127	209	358				Abcg8	0.579706	6.368	3.11518e-15	5	7	3	0	0	1	4122	4412	3823	6744	6614	7569	176	632	2783	14	28	12
Triqk	4.91426	0.476675	1.40209e-18	365	345	215	177	106	170	42	32	49	11	28	24	12	8	56	8	10	13				Ablim1	0.219632	-1.93226	3.45747e-15	10940	11249	12166	13712	16556	14284	1555	1691	1482	2416	2136	2200	5072	4544	2399	17189	13111	11768
Smim14	2.03047	0.21345	1.47498e-18	6884	6761	5989	7660	6959	6069	1815	1837	1734	1776	1995	2016	2155	1882	2523	2557	2168	1857				Lhpp	0.228729	2.02923	3.46592e-15	176	189	165	120	150	167	2653	2712	2919	1403	1435	1722	514	765	1427	232	251	317
Slc27a2	-9.46616	0.729597	1.76027e-18	0	2	1	0	0	0	5956	6799	7413	1622	1718	2490	271	592	1137	1	7	6				Defa23	0.690097	7.73096	3.51435e-15	0	0	0	0	0	0	1547	2630	3474	5886	4148	5207	171	409	2589	0	4	7
Slc41a1	1.90891	0.203547	2.51394e-18	2083	1879	2384	1900	2108	2363	890	899	879	562	635	821	929	968	1213	1672	1627	1397				Pde9a	0.270917	-2.32816	3.59336e-15	213	140	170	118	190	189	2100	1914	1582	1122	1129	1167	511	567	1534	5240	3783	3378
Slc2a10	4.7763	0.490443	2.5318e-18	475	604	292	196	247	188	133	95	97	33	39	23	16	35	158	14	13	25				Bhlha15	0.360032	3.33527	3.82531e-15	371	354	571	688	470	406	619	665	834	503	564	594	253	385	862	37	40	33
Creb3l3	-9.80454	0.70276	2.90885e-18	4	3	0	1	5	2	1716	1979	1364	10267	10475	9838	162	74	177	407	179	239				Tent5c	0.334176	3.01194	4.02808e-15	294	444	398	293	260	387	693	681	833	952	893	1100	505	941	943	112	88	80
Ackr3	7.59902	0.613554	3.03372e-18	1235	1072	952	389	761	1039	5	12	6	0	1	0	12	8	9	3	2	3				Ids	0.172184	-1.46831	4.41755e-15	1368	1344	1480	1357	1549	1432	1076	1155	1198	797	776	840	1281	1081	1120	3190	2908	2515
Tesc	6.35825	0.527465	3.03372e-18	1044	1233	946	1002	1020	870	19	20	33	4	5	9	7	5	6	3	2	2				Atp8a1	0.198972	-1.67265	4.9745e-15	3798	3540	3106	1910	2696	3115	2928	3090	2726	1848	1957	2275	1204	1169	2225	4862	4946	5374
Eda	7.47838	0.623133	3.10136e-18	176	197	113	57	57	82	2	2	3	0	1	2	1	1	0	1	0	0				Gamt	0.38178	3.39791	6.60411e-15	58	39	43	45	59	53	195	148	132	118	125	141	29	43	71	10	13	4
Rab11fip5	4.50907	0.417467	4.14612e-18	2032	1786	2212	1554	3527	2788	7	27	16	10	24	33	1877	899	225	777	540	386				Mlxipl	0.320285	2.86231	6.82645e-15	52	64	65	91	41	33	13889	12508	16494	8900	10367	11941	1974	3352	5771	1258	945	760
Naglu	1.41943	0.153519	4.27161e-18	1595	1667	1598	1314	1480	1582	824	988	844	596	674	714	829	783	948	1390	1329	1265				Pibf1	0.226327	-1.92681	8.03857e-15	362	335	283	313	280	336	250	249	272	154	165	211	492	406	483	690	731	889
Ephx4	5.70329	0.526157	5.6736e-18	243	219	172	241	271	258	2	4	1	4	6	1	18	9	13	2	8	5				Aqp8	0.636214	-8.2735	8.37601e-15	0	0	0	0	0	0	19	18	4	4	1	3	0	1	4	3692	2220	1167
C1qtnf6	4.63296	0.456812	5.71702e-18	894	1012	1172	1406	1791	1302	85	91	65	92	104	95	28	39	116	284	356	231				Hoxa9	0.712106	-11.7894	8.80502e-15	0	0	0	1	0	0	0	1	0	1	0	0	0	0	1	4170	3766	1777
Plcb3	-1.84446	0.195599	6.17785e-18	7154	7611	7309	6051	6199	6519	37599	41386	40153	38418	43065	45997	18823	24025	36484	29833	26239	24221				Cutal	0.331968	-2.91659	1.00596e-14	286	268	311	205	239	159	245	248	207	352	303	290	401	284	548	2034	1937	1779
Pdzrn3	5.51608	0.528069	6.1973e-18	1511	1474	1552	1884	2363	2570	122	124	153	51	35	62	18	35	101	128	62	41				Nags	0.529461	5.27163	1.1022e-14	1	0	0	0	0	4	995	1044	995	1215	1422	1531	42	116	422	6	17	10
Ptges	7.194	0.609406	6.92563e-18	7057	6224	6089	1667	2232	2335	31	78	15	41	65	47	78	23	295	142	165	72				Vps13c	0.215485	-1.79019	1.19065e-14	2213	2281	1647	1865	1771	1434	1018	1124	1356	723	796	904	1331	1624	2836	3024	2035	1803
Abca5	4.46008	0.441562	7.41824e-18	1279	1076	1406	728	802	926	63	131	140	50	49	60	56	37	75	46	55	40				Mlkl	0.230844	-1.97946	1.33904e-14	894	1004	928	1496	1390	1025	354	348	303	274	351	375	1092	851	750	1951	1728	1852
Rilpl1	4.25935	0.422459	7.69313e-18	331	373	298	244	259	432	20	16	25	10	16	24	55	36	50	34	59	47				Habp2	0.714448	7.76035	1.34219e-14	2390	2654	3623	1995	2397	2178	695	687	1072	420	371	425	64	218	377	0	0	0
Chp2	-9.09151	0.696258	9.66955e-18	1	4	0	0	0	0	2444	2605	2624	4830	4549	4648	95	177	887	3621	2455	1396				Acsf2	0.275046	-2.34199	1.35974e-14	1104	1176	895	763	701	788	942	770	757	988	1010	1143	1026	1127	1690	3518	3948	4251
Cst3	1.09457	0.120762	1.43406e-17	2989	3244	3065	2749	3276	3182	2327	2537	2405	1843	1963	1996	1360	1443	1995	2055	1975	1781				Cyp2d34	0.477429	-4.5417	1.4313e-14	15	68	18	17	14	15	177	241	221	277	219	229	292	143	329	5365	4913	4673
Prkar2b	4.33753	0.430589	1.79418e-17	738	744	1229	950	714	895	71	70	95	46	60	47	111	56	153	4	5	2				Naaa	0.171537	1.43905	1.54755e-14	769	821	632	690	721	746	970	1120	895	1008	1115	1166	430	397	432	474	369	415
Erlec1	1.31102	0.144771	1.88084e-17	3433	3491	3220	2580	2643	2858	1931	1969	1884	1673	1622	1771	1554	1427	2014	2512	2424	2254				Glrx	0.249136	2.1792	1.5792e-14	869	1175	886	1133	937	942	2589	2865	3097	2988	2636	2920	557	858	1785	333	413	392
Fa2h	5.96166	0.559635	1.98085e-17	825	1058	344	345	265	217	8	11	18	14	9	11	42	19	74	2393	2104	2474				Acot2	0.260461	2.19068	2.03412e-14	63	70	87	87	80	65	214	263	212	220	247	319	118	83	54	77	98	79
Cdh3	4.14555	0.404871	2.18563e-17	1520	1230	1460	841	1703	1891	86	55	57	38	56	58	73	61	45	65	50	30				Slc19a2	0.176549	1.45488	2.33523e-14	2227	1992	2848	2163	2535	2483	1730	1858	1746	1985	1666	1983	1862	1759	935	1318	1007	953
Kif19a	5.80448	0.540885	2.51996e-17	1332	1250	2516	913	660	1062	32	53	60	12	39	24	49	29	86	48	75	38				Cck	0.506501	4.93042	2.43673e-14	3	1	0	0	0	0	1396	1460	2060	701	546	552	99	92	601	7	12	8
Tff1	9.36436	0.652398	2.62433e-17	24835	45842	6488	11648	20506	9387	8	16	35	8	7	8	8	26	4	0	0	0				Mep1a	0.320999	-2.7058	2.63242e-14	0	0	1	2	0	0	1759	1950	2060	1637	1891	1654	176	261	1891	3051	4510	3081
Scn2b	-5.26392	0.5078	2.75881e-17	1	1	7	10	1	10	333	413	321	395	414	483	395	491	939	409	417	261				Lpcat2	0.4489	-3.78815	2.67224e-14	450	514	333	515	440	350	26	17	12	5	9	10	15	19	66	176	115	61
Wnt3	-7.63529	0.761497	2.75881e-17	0	0	0	0	1	0	165	227	275	283	286	321	177	324	521	3	2	2				Cpn1	0.425407	3.9755	2.7976e-14	2915	2800	3560	1817	1944	2272	885	982	823	351	309	504	180	341	233	38	27	27
Hook1	-2.77291	0.296448	2.79518e-17	3179	3084	3824	4063	3628	3368	16609	16397	15836	21600	21635	25883	17767	23766	16931	18451	15176	14431				Rac3	0.302705	-2.57202	3.42766e-14	653	675	633	424	351	460	235	235	194	259	304	278	268	230	335	1534	1472	1213
Pde5a	-2.00573	0.216405	2.84529e-17	680	725	680	820	911	784	4097	4518	4457	4055	4203	4475	3001	3590	4809	5631	5249	5790				Gm7823	0.385043	3.35475	4.05471e-14	256	266	308	224	186	267	140	174	174	121	87	143	33	74	70	8	10	10
Cd14	3.96536	0.406464	3.13174e-17	4903	3725	3287	1481	2913	3272	284	347	376	161	222	210	669	485	640	1573	1306	1273				Mreg	0.609899	5.61454	4.30678e-14	1	1	8	9	9	6	191	165	272	253	256	350	135	311	282	1	6	3
0610005C13Rik	-6.19112	0.535716	3.39962e-17	5	9	5	2	2	4	1096	1059	1072	1462	1277	1454	5	19	49	279	329	288				4732465J04Rik	0.754647	-8.99849	4.51799e-14	1	0	0	0	0	0	0	1	0	0	0	0	0	1	2	162	215	265
Galnt11	1.39054	0.154741	3.39962e-17	1411	1258	1279	1008	1146	1188	767	910	842	561	606	647	574	589	780	1015	926	864				2010111I01Rik	0.148347	-1.22517	4.56249e-14	1221	1311	1205	1187	1569	1574	1182	1115	1084	959	1002	1080	1627	1812	1107	3594	3554	3139
Dach1	-7.65503	0.666944	3.81464e-17	0	0	4	2	0	0	1361	1262	1582	460	442	614	526	828	1035	27	36	68				Cyp3a25	0.800698	9.11481	4.99277e-14	0	0	0	1	0	0	1016	1301	1144	4697	4236	4393	13	28	85	0	1	2
Man1c1	5.44098	0.513378	3.81536e-17	403	399	205	154	245	388	15	15	16	12	8	15	11	3	25	14	9	7				Mettl7a1	0.195131	-1.60654	5.82444e-14	1442	1601	1280	1454	1208	1224	701	771	597	619	768	859	789	818	816	2821	2481	1844
Btg2	1.96876	0.215083	4.19277e-17	9810	9900	8401	6583	9260	8723	2024	2144	2156	2083	2429	2422	2523	2176	2299	3589	3136	2420				Mme	0.702517	8.20302	5.90689e-14	3	6	9	14	19	12	2350	3106	3553	6459	4407	5488	3	5	92	5	4	1
Adamtsl4	3.31082	0.331401	4.79287e-17	3157	2906	2299	2422	4377	3008	63	67	45	65	102	83	1231	498	174	555	388	388				Bik	0.322923	-2.62153	6.23403e-14	198	219	160	125	177	119	21	30	32	13	11	29	32	65	90	83	100	82
Arhgap44	5.20851	0.485523	4.98743e-17	3666	3493	3123	2431	2713	2715	39	54	29	84	109	85	59	93	78	9	8	6				St6galnac4	0.535773	-5.25313	8.26774e-14	8	14	11	15	12	4	8	23	12	35	29	40	44	69	77	1929	1199	608
Guca2a	-7.70143	0.637928	5.23247e-17	2	3	0	1	4	4	1153	1380	1300	3331	2560	2145	1245	2714	7217	1078	1997	2361				Atf4	0.146924	1.1836	8.31329e-14	6694	6757	5548	7433	6610	5261	7589	7632	8273	7629	8477	8724	11115	9903	6322	5942	5030	4813
Rnase1	-7.51404	0.655194	5.85726e-17	0	1	4	0	0	1	1540	1587	2166	518	646	761	24	69	108	61	98	93				Car4	0.741194	-8.61856	8.31329e-14	2	2	0	0	0	0	0	1	1	4	2	0	0	0	8	1236	698	390
Gm5609	7.92374	0.776801	6.01893e-17	195	172	203	190	161	193	0	0	0	0	0	0	6	5	2	150	142	178				Cldn2	0.374195	3.32584	8.7908e-14	8832	7088	15024	10377	16100	10970	19102	18868	17665	9008	10336	11742	13914	15005	18545	932	1096	1492
Gramd1a	3.60006	0.367794	6.87201e-17	1704	1557	1721	1148	1795	2318	143	129	157	78	87	109	160	109	98	29	23	16				Prss46	0.788403	-7.64817	1.11183e-13	1	3	0	2	1	0	0	0	0	0	1	0	4	3	7	88	92	135
Proc	4.16422	0.434487	8.55308e-17	308	330	278	101	222	212	41	56	46	26	34	27	9	18	40	40	35	25				Setbp1	0.403956	-3.08953	1.19273e-13	1872	1813	1908	1058	1161	1153	330	502	420	109	94	133	50	58	398	429	680	817
Slc30a10	-6.55241	0.553465	9.2243e-17	16	11	20	10	5	1	5513	5825	4788	6110	5056	5637	1621	1183	10447	329	401	816				Gsdmc	0.731847	-9.14268	1.30551e-13	0	1	2	0	0	0	0	0	0	0	0	1	0	0	1	225	329	234
Lrrc19	-8.89201	0.790249	1.12746e-16	0	0	0	0	0	0	658	719	794	1662	1541	1557	57	97	456	3218	2800	1674				Esam	0.382129	3.22597	1.37265e-13	551	494	774	863	577	577	106	122	119	106	102	165	124	129	115	8	21	13
Mylk3	-6.48466	0.624238	1.14065e-16	1	1	0	0	4	1	413	392	382	203	180	242	18	21	30	0	1	0				Icam1	0.286704	-2.44254	1.4999e-13	2936	2494	2425	2636	3802	3398	21	27	29	10	20	21	202	181	41	336	323	244
Lgmn	2.26594	0.251511	1.21216e-16	6993	5883	5503	4408	3921	4175	1488	1792	1659	1497	1525	1658	1217	1194	1625	1709	1650	2031				Hoxa13	0.568282	-9.18825	1.55664e-13	0	0	0	1	0	0	6	4	4	0	1	2	0	1	1	2902	2343	983
Entpd8	-3.48614	0.362103	1.26849e-16	124	183	212	180	292	181	4221	3939	3579	2077	2471	2326	2872	2950	3592	4611	4680	4700				Endod1	0.310358	-2.65512	1.59918e-13	2741	2888	2456	3814	4618	4304	994	1245	1329	1696	1972	1556	5371	4824	3832	14472	14964	13445
Apbb2	-1.88062	0.212241	1.55154e-16	364	331	303	325	551	413	829	863	826	808	807	834	1450	1313	751	806	625	728				Dab1	0.809501	7.85404	1.64752e-13	10	2	5	0	1	2	783	790	681	403	399	460	11	13	68	0	0	0
Abcg8	-8.1436	0.645156	1.5931e-16	5	7	3	0	0	1	4122	4412	3823	6744	6614	7569	176	632	2783	14	28	12				Nupr1	0.296319	-2.52825	1.83055e-13	5101	4407	3224	5842	6431	4073	748	700	1105	829	1170	1084	6119	2985	2311	12071	9833	8701
Galnt12	1.61348	0.18236	1.60759e-16	2323	2820	2732	2939	2587	2511	1223	1391	1264	1033	1136	1181	1739	1981	2463	3345	3372	3671				Pter	0.136129	1.09013	1.8915e-13	497	534	459	461	432	432	1131	1155	1021	965	965	1061	434	498	456	648	476	419
Pls3	1.8568	0.205557	1.72353e-16	6019	5133	5208	4750	6284	6389	873	958	844	981	1185	1151	5138	4100	3021	6205	4894	4523				Syngr1	0.217745	1.80007	1.95711e-13	4620	4909	4054	3196	3148	3311	1669	1816	1582	1613	1778	1876	505	741	798	449	347	452
Tldc2	-7.99617	0.806899	1.89792e-16	0	0	0	0	0	0	214	251	170	380	381	382	26	45	92	82	84	90				Eif2s2	0.169662	-1.37147	2.17044e-13	1806	1791	1641	2265	2071	1901	2171	2333	2063	2331	2466	2662	5743	5112	4603	8238	7738	7322
Fmnl3	3.56343	0.371587	2.00777e-16	1178	1035	1226	1005	1695	1209	95	88	104	61	90	62	91	184	88	114	142	123				Abcc6	0.254705	2.1369	2.19295e-13	7	15	7	7	16	6	1200	1231	1299	748	773	942	94	189	403	111	136	76
Slc13a1	-9.02585	0.806854	2.0419e-16	0	0	0	0	0	0	911	1436	1368	2083	1610	1743	40	136	469	124	252	506				Npc1l1	0.693463	7.70703	2.28118e-13	6	7	4	5	2	6	4694	4413	4185	18335	18259	17681	176	422	3290	2	21	15
Fam171a2	3.49608	0.37407	2.28465e-16	546	601	646	317	699	715	94	94	62	55	69	64	102	128	162	60	67	39				Lyz2	0.694399	7.2058	2.43017e-13	3	1	32	9	15	21	2348	3124	2991	3012	2573	3023	971	2006	6047	4	12	0
Dab1	-4.69368	0.462856	2.60288e-16	10	2	5	0	1	2	783	790	681	403	399	460	11	13	68	0	0	0				Rcan3	0.155382	-1.23737	2.54578e-13	1344	1375	1239	1351	1455	1374	640	648	641	546	640	618	1345	981	1321	1755	1395	1499
Ninj1	1.77499	0.201316	2.91959e-16	1588	1641	1461	1086	1368	1193	607	670	613	447	414	550	442	543	517	853	831	678				Papln	0.570678	5.62213	2.59818e-13	22	11	19	0	7	2	2387	2141	1024	1379	1489	2046	115	303	437	10	19	14
Trove2	1.31676	0.150508	3.45822e-16	1328	1244	1134	1236	1381	1254	594	687	700	492	481	541	943	885	961	1117	947	941				Vsig10	0.182145	-1.43066	2.6706e-13	2305	2261	1771	1537	1649	1712	2603	2816	2984	1437	1676	1834	1706	1898	3565	3963	3642	3164
Ecscr	4.01872	0.41286	4.19801e-16	1509	1470	2087	2634	2816	2261	89	137	104	39	66	67	804	743	468	1302	1044	859				Arid5a	0.290105	-2.44323	2.82696e-13	695	650	821	734	1281	887	29	60	50	48	60	47	622	357	196	555	531	588
Nags	-7.69604	0.680361	4.19801e-16	1	0	0	0	0	4	995	1044	995	1215	1422	1531	42	116	422	6	17	10				4732419C18Rik	0.488899	4.22311	2.9425e-13	12	19	17	13	10	18	146	103	69	97	129	149	35	15	17	6	10	6
Defa23	-9.97288	0.831147	4.46578e-16	0	0	0	0	0	0	1547	2630	3474	5886	4148	5207	171	409	2589	0	4	7				Tmem171	0.289536	-2.34139	3.33319e-13	683	668	744	1099	914	882	1245	1375	1060	1033	1006	1144	903	884	1948	3852	4930	4148
Abat	-6.91984	0.615597	4.51537e-16	0	4	0	1	0	8	1318	1170	857	777	1014	1098	36	104	225	1217	761	384				Usp53	0.203237	-1.638	3.55101e-13	2022	2000	1574	1456	1405	1364	1250	1366	1287	1111	1085	1106	2077	1723	1293	5593	4508	3894
Clec2e	-9.7729	0.73791	4.96991e-16	1	0	2	0	0	0	2021	1769	2287	6967	6330	6253	654	518	3369	791	848	1121				Zfp750	0.493618	-4.5665	4.18542e-13	967	910	962	789	1138	1224	0	1	3	2	18	4	146	90	31	475	350	236
Sytl1	3.3039	0.361054	5.48634e-16	2644	2211	1819	1161	1348	1290	249	292	310	230	279	252	338	286	476	647	501	307				Cnn3	0.347466	2.92778	4.46e-13	3123	3244	3751	4131	6418	5973	3030	3132	2924	1838	2024	2427	1601	2395	1783	360	469	258
Mrps22	-1.13437	0.130951	5.56596e-16	681	643	619	679	750	633	1237	1198	1241	1210	1157	1367	1175	1237	949	1145	919	992				Ppp3cc	0.207798	-1.64629	4.73647e-13	240	242	184	206	250	200	98	139	147	91	107	97	121	105	149	309	331	298
Ltbp3	5.7005	0.535157	6.2485e-16	10221	8831	8597	2552	4024	6473	132	151	142	60	94	45	356	253	182	344	291	192				Ap1s3	0.145957	-1.17183	5.04041e-13	418	485	450	542	548	615	461	495	464	442	476	518	1082	1045	437	2381	2077	1667
Cryl1	-1.89015	0.212481	6.58574e-16	836	809	912	876	860	1012	5205	5313	4689	4713	4991	5417	1725	2250	3166	3815	3403	3018				Soat2	0.529498	4.80455	6.75095e-13	648	642	399	315	231	176	1287	1216	957	2513	2877	2687	905	757	692	48	62	81
Maoa	-5.64406	0.540425	7.51807e-16	184	224	235	336	252	257	4226	4808	4750	14670	16059	15424	6873	4538	4686	25070	24351	16494				Ceacam2	0.308094	-2.55885	7.49479e-13	36	31	48	54	55	56	156	143	141	156	185	153	575	523	569	929	873	1377
Insc	-6.0342	0.582807	7.79038e-16	8	1	4	3	1	1	257	276	208	492	445	480	199	212	326	113	99	123				Ecscr	0.365036	-3.04452	9.05453e-13	1509	1470	2087	2634	2816	2261	89	137	104	39	66	67	804	743	468	1302	1044	859
Osbpl6	-4.18072	0.428192	8.13012e-16	76	45	52	60	33	36	1283	1369	1473	1645	1505	1643	324	352	572	225	105	77				Alpk1	0.275653	-2.15297	9.39207e-13	934	946	599	418	545	674	292	329	392	177	210	231	646	716	964	858	886	846
Epb42	-4.75768	0.496786	8.4712e-16	6	4	4	4	5	1	121	148	141	114	114	170	17	40	21	3	7	3				Sult6b2	0.775696	8.49941	9.9477e-13	0	0	0	0	0	0	799	1320	1632	2610	2061	2111	2	7	30	0	0	3
Tmed9	1.36442	0.156781	8.53989e-16	6920	6628	7927	7906	9103	8103	2555	2811	2642	2081	2292	2469	4333	4028	3221	4156	3749	3527				Fam117a	0.364552	3.09393	1.08547e-12	615	529	445	367	578	698	493	422	397	196	212	252	83	105	158	23	32	19
Sgsm3	1.24692	0.143369	8.81364e-16	4664	5253	4276	4836	5353	4495	1210	1351	1291	1319	1521	1514	3758	3958	2419	5524	4335	4336				AI464131	0.243359	1.99373	1.09111e-12	380	402	502	356	358	431	1561	1585	1545	811	827	1030	252	415	780	174	179	133
Rab12	2.29041	0.256555	9.38899e-16	1348	1221	1060	1335	1760	1646	273	259	233	194	233	188	417	370	311	494	459	370				Slc5a3	0.20416	-1.61116	1.48876e-12	836	728	803	793	728	571	286	313	352	324	341	384	759	652	493	1888	1179	1230
Mlph	2.22566	0.2537	9.92697e-16	10273	12170	5916	8149	9229	9134	2935	3143	3100	2226	2514	2344	3062	2669	3756	3897	3305	3287				2310040G24Rik	0.410819	3.37214	1.5982e-12	20	21	31	40	36	31	154	214	165	99	123	125	41	72	68	17	11	8
Gm44220	9.19708	0.770418	1.06793e-15	209	203	222	106	84	91	0	0	0	0	0	0	0	0	1	0	0	0				Nadk2	0.255474	2.04772	1.69618e-12	1291	1337	1313	1330	1118	1176	8623	9165	8578	4184	4306	5290	2406	2705	3267	1390	1207	1092
Hs3st3b1	4.72388	0.473721	1.14988e-15	1324	1574	1210	873	710	853	23	27	32	23	24	35	110	251	74	287	201	313				Slc28a2	0.665471	6.62059	1.92218e-12	47	33	14	5	4	2	1232	1622	1955	814	1287	688	218	165	577	4	4	3
Ly6e	3.47434	0.375022	1.23385e-15	41763	38375	47386	41608	42149	56847	4867	5533	4410	2840	2501	2827	7515	6931	6153	17100	10687	7527				Tmem41a	0.165614	1.27434	2.10405e-12	271	300	280	287	331	230	1248	1204	1243	1243	1386	1350	752	851	842	641	527	534
Plekhh2	4.67217	0.454309	1.23547e-15	616	530	591	460	864	799	11	18	13	17	15	20	14	24	13	93	90	48				Dll1	0.452906	4.06013	2.12835e-12	629	457	373	108	232	190	2035	2114	2302	1279	1425	1720	404	774	765	58	85	45
Rasgrp1	9.20158	0.783532	1.31999e-15	405	404	380	408	518	370	0	0	0	0	0	0	1	1	0	0	0	0				Eya2	0.458806	-3.69909	2.26763e-12	4379	5664	4415	4268	4667	5485	6	8	7	11	13	2	21	20	29	81	200	77
Gimd1	-8.59233	0.746817	1.3427e-15	0	0	0	0	3	0	516	563	616	939	1178	1212	96	293	335	0	2	3				Osbpl6	0.377997	3.12875	2.28446e-12	76	45	52	60	33	36	1283	1369	1473	1645	1505	1643	324	352	572	225	105	77
Clec2h	-9.30905	0.740204	1.38103e-15	0	1	1	0	0	0	1555	2258	1638	5035	4653	3952	667	698	5896	3431	2605	2123				Rgn	0.300631	2.43526	2.44148e-12	69	74	112	71	58	62	863	875	666	741	865	1051	99	107	179	124	139	97
Tmem253	-5.20476	0.507506	1.50407e-15	40	46	30	36	26	35	1128	1025	832	2101	2489	2254	1068	716	1249	2731	2968	1990				Mfsd4a	0.360601	-2.83993	2.66318e-12	4813	5246	4642	2645	1957	2926	1565	1773	2226	1409	1334	1249	1445	1282	2225	12888	7989	5581
Glod5	-5.64931	0.530108	1.50526e-15	3	9	7	4	5	2	1041	1077	1068	1561	1445	1526	96	123	839	496	554	502				Fzd10	0.853607	-7.59355	2.84264e-12	17	18	9	15	51	27	0	0	0	0	0	0	47	25	36	55	141	299
Glb1l2	8.32212	0.681599	1.58838e-15	754	905	555	193	241	321	0	2	3	0	0	3	4	3	5	0	1	3				Ripk2	0.229205	-1.81781	2.84264e-12	204	181	238	260	314	256	94	126	145	145	132	118	326	298	195	881	640	634
Tor4a	1.39842	0.163689	1.74821e-15	2759	2604	2732	2520	2840	2872	1566	1610	1359	1150	1353	1347	1370	1209	1774	2473	2195	1963				Dagla	0.214181	1.67452	3.14561e-12	867	900	1010	733	753	901	516	558	565	462	493	438	399	419	572	166	152	85
Trf	8.60668	0.638724	1.74821e-15	5392	4920	13467	3690	3812	3167	20	30	20	1	4	3	3	2	5	3	2	0				Neurog3	0.429296	3.53902	3.31658e-12	3	4	0	1	1	0	331	373	362	187	254	325	56	170	161	22	13	13
Eml1	7.41291	0.581653	1.98231e-15	1969	2215	1974	1733	2069	2078	38	35	22	3	7	10	1	2	6	1	2	1				Acot1	0.40145	3.19524	4.0121e-12	108	105	165	202	239	153	341	326	230	304	393	564	151	173	85	38	67	74
Cerkl	5.8811	0.545507	2.03872e-15	185	197	120	48	37	69	18	14	23	10	2	6	0	2	10	1	1	0				Slc26a6	0.483486	4.46659	4.59236e-12	100	94	93	96	128	140	4071	4988	4209	8117	7173	8083	149	271	1604	96	134	104
Habp2	3.78166	0.423411	2.23551e-15	2390	2654	3623	1995	2397	2178	695	687	1072	420	371	425	64	218	377	0	0	0				Krt84	0.647203	-5.62435	5.05957e-12	26	22	7	26	31	48	4	11	3	13	4	7	9	13	74	672	287	135
Cadm4	4.2163	0.442911	2.37752e-15	922	1060	709	372	734	849	26	35	35	41	56	63	108	101	124	138	149	163				Esr1	0.488008	-4.43854	5.37034e-12	64	77	116	73	41	55	7	15	13	8	10	5	168	66	29	504	383	538
Gm14851	-8.52321	0.810522	2.64622e-15	0	0	0	0	0	0	844	804	1319	1130	904	1251	6	17	121	0	1	0				Prlr	0.60979	6.31736	5.3968e-12	5	1	2	0	1	0	2198	2382	2375	2117	1702	1727	0	18	267	1	2	6
Ghr	2.26234	0.271937	2.82104e-15	1854	1571	1750	1017	1414	1500	1875	1870	2125	1400	1008	1243	89	201	686	344	261	283				Cd55	0.265048	-2.09519	5.50607e-12	4129	3735	2647	2439	3243	3440	1179	1305	1200	1645	1581	1442	5731	3742	2702	11159	9542	7540
Slc14a1	-7.50854	0.806787	3.03422e-15	0	0	0	0	0	0	123	172	336	242	244	282	607	1254	2197	1	3	0				Mt2	0.486424	3.86678	6.00874e-12	126	181	122	206	360	305	214	152	217	364	341	356	86	208	51	44	41	18
Cd9-ps	1.85902	0.214781	3.08693e-15	3565	3693	3331	3682	4194	3841	645	805	669	810	941	904	1961	1955	1617	5142	4127	3491				Appl1	0.235147	-1.81568	6.01387e-12	1396	1426	1464	1497	1393	1414	1295	1402	1392	1802	1743	1970	2297	2092	2321	6275	6253	6633
Clca4b	-10.3637	0.729174	3.60502e-15	1	5	1	1	4	0	4832	5241	6576	30016	30330	26039	3174	2665	11018	512	452	805				Bsn	0.170598	-1.27377	7.00734e-12	539	606	608	565	464	559	750	696	651	436	485	572	440	485	687	1107	1220	979
Car5b	5.0419	0.500007	4.24149e-15	540	511	467	316	395	478	4	6	3	8	10	5	76	30	24	145	73	67				Srgap3	0.462986	-3.80955	7.32794e-12	266	310	146	324	243	199	85	122	92	38	43	36	434	177	398	816	850	1159
Trim13	2.48081	0.280132	4.53927e-15	504	515	361	472	629	513	58	84	69	44	63	61	142	146	92	97	68	58				Arhgef40	0.312394	-2.45248	7.5528e-12	3511	3220	2488	3012	4091	4084	353	358	267	318	389	355	2214	1303	1739	3626	2370	1481
Itih5	-4.647	0.481116	4.61761e-15	5	6	13	5	4	2	456	367	355	245	361	311	1432	903	2974	15166	10998	7008				Ptpn9	0.134265	-1.0032	7.65934e-12	2083	2143	1820	1793	2364	2057	1107	1252	1179	827	873	942	1615	1549	1539	2352	2063	2014
F5	6.14258	0.555424	4.6943e-15	2491	3018	3455	3008	4452	4494	92	100	65	33	40	17	8	6	11	2	11	7				Gm4815	0.358036	2.84019	8.38262e-12	404	406	493	568	792	834	381	426	444	291	249	338	232	330	239	66	62	41
Slc5a11	-9.11633	0.786714	5.14844e-15	0	1	0	0	0	1	110	155	166	485	383	447	4	4	0	0	0	0				Hoxa11os	0.742093	-11.7105	9.03913e-12	0	0	0	0	0	0	1	0	0	0	0	0	0	1	0	3498	3060	1411
Cd302	-5.32375	0.524628	5.30393e-15	3	4	7	1	2	1	831	871	909	484	522	600	9	37	92	0	10	5				Gabrp	0.790872	-7.93272	9.24563e-12	1905	1960	3761	961	1677	4286	0	0	0	0	0	0	13	12	1	824	447	267
Aldob	-11.3003	0.720831	5.87267e-15	3	15	14	9	2	1	66551	71402	78740	350473	317155	340136	1508	3620	26682	654	387	231				Ror2	0.464297	3.90809	9.32669e-12	1116	1018	1510	1349	1537	1533	831	961	665	609	669	777	379	848	610	90	53	9
Ccl6	-5.94149	0.565181	6.36417e-15	2	3	2	5	1	1	1541	1593	3294	969	617	656	229	400	2376	305	302	269				Zfp667	0.26366	-1.98378	9.40739e-12	222	190	165	165	190	182	73	79	51	53	57	36	57	45	89	168	197	161
Orai3	1.75147	0.208972	6.46224e-15	554	602	590	476	488	488	350	343	274	244	263	293	253	217	435	421	480	361				AY761184	0.862724	7.91476	9.8351e-12	0	0	0	0	0	0	683	649	650	755	467	812	12	69	319	0	0	0
Banp	1.63814	0.19553	7.10191e-15	1320	1243	1308	1072	1275	1197	792	789	633	502	620	627	481	418	761	872	778	663				Tns4	0.325687	-2.58372	1.04597e-11	22059	17348	34872	30402	45017	42553	3634	3616	3226	2703	3024	2632	13403	9224	7533	35419	26484	27993
Sox2	10.5938	0.769812	7.2891e-15	1410	1680	1311	724	575	1121	0	1	0	0	0	0	1	1	0	0	1	0				Dhrs4	0.259214	1.98584	1.13376e-11	750	907	835	782	860	752	4345	4894	4269	4957	5219	6260	792	1569	1300	1191	1286	1151
Zfp750	5.69436	0.539836	8.79408e-15	967	910	962	789	1138	1224	0	1	3	2	18	4	146	90	31	475	350	236				Tbc1d9	0.377225	2.97264	1.16674e-11	653	698	390	992	1268	868	1039	1049	1188	1262	1388	1330	742	512	525	176	168	262
Cacnb3	1.29671	0.155379	9.42547e-15	2434	2419	1929	2067	2675	2261	1133	1214	993	903	921	1028	2156	1984	2189	3617	2885	2754				Ceacam1	0.317227	-2.50871	1.35631e-11	1716	2031	2341	3367	3150	2536	6579	6028	5553	6525	7113	6965	25668	20043	24871	39561	37037	54445
Slc22a17	6.49507	0.598784	9.74701e-15	2046	1662	1183	292	500	693	57	63	63	8	14	9	3	3	18	4	2	3				Tmem161b	0.149542	1.09945	1.42221e-11	603	625	685	722	701	594	954	1007	1046	1004	1021	1156	979	1168	649	801	622	689
Erich2	4.61497	0.493094	9.76459e-15	233	224	210	147	108	131	20	18	6	15	7	10	18	15	31	9	10	20				Gm15401	0.607842	-5.67178	1.54023e-11	5	40	9	23	9	14	7	10	5	3	4	4	8	2	10	431	411	180
Sec62	1.17342	0.141153	1.01607e-14	6063	5898	5601	5283	5197	5568	3142	3606	3546	2523	2568	2851	3139	2905	3243	3632	3279	2723				Tat	0.770015	-7.16886	1.54367e-11	1	0	0	0	0	0	1	3	7	0	0	0	9	19	32	122	316	533
Yipf2	1.68245	0.200292	1.10214e-14	2784	2598	2391	2376	2294	2302	957	1060	873	710	831	896	1188	852	1141	1374	1188	931				Evx1	0.591117	-6.96422	1.55789e-11	1	3	0	4	1	1	3	4	3	1	0	0	1	2	2	407	300	195
Itga5	3.34627	0.386906	1.19383e-14	1298	1266	780	1215	1525	1169	389	446	267	189	205	264	174	247	554	43	47	81				Agpat3	0.164135	1.22197	1.56155e-11	2874	2789	2785	2626	3361	3168	5873	6529	6634	6440	6132	7835	2542	2640	3102	3051	2746	2684
Adtrp	-5.92985	0.560571	1.29837e-14	5	8	15	23	0	4	1203	1348	1283	1300	1330	1386	318	469	758	735	1163	1261				Mypop	0.269414	-2.02969	1.58035e-11	291	253	204	194	260	249	42	41	45	43	68	62	57	71	89	226	191	178
Plcb1	3.97889	0.459196	1.4152e-14	326	286	706	309	258	326	136	112	122	74	51	66	33	70	241	10	6	7				Large1	0.164039	-1.21802	1.64561e-11	874	782	961	865	1134	1063	729	747	764	642	607	697	1029	961	971	1965	1722	1757
Arhgap23	3.14624	0.345562	1.72366e-14	756	747	622	622	934	759	24	50	22	22	46	25	413	301	106	87	98	78				Itln1	0.566461	5.23337	1.69133e-11	144	67	218	212	363	625	36338	42389	57892	36339	30856	33525	4824	12515	34045	374	472	449
Arntl2	2.40993	0.278339	1.74655e-14	1253	1281	1141	882	1046	1339	172	195	153	138	136	147	403	350	209	277	204	288				Vash2	0.365351	2.7882	1.91453e-11	273	248	301	171	356	258	253	302	342	151	173	197	367	415	162	51	49	43
Zbtb7c	5.98994	0.595454	1.75371e-14	349	570	250	144	239	358	7	8	11	3	0	1	31	13	27	241	224	252				Wls	0.221058	-1.64775	1.94941e-11	7588	7053	8812	7153	8519	8788	2855	2927	3043	1730	1975	1946	6747	5617	5656	9484	7689	7517
Ptprs	2.41948	0.286602	1.89566e-14	8192	7706	9191	6239	9564	10228	2677	2958	3204	1590	1766	2167	2347	2791	3329	1892	2135	1739				Slc14a1	0.678355	5.92553	1.97244e-11	0	0	0	0	0	0	123	172	336	242	244	282	607	1254	2197	1	3	0
Cdhr5	-8.07546	0.651802	1.90081e-14	12	48	29	74	9	5	8807	9484	9338	27492	26043	25704	7467	6931	12022	25962	24754	25496				Ly6c1	0.560219	-5.45937	1.9727e-11	1217	1089	290	2715	3232	3668	9	11	16	20	30	14	1360	396	121	3881	3229	2819
Tnfsf15	-6.45925	0.687614	1.94951e-14	1	0	0	0	1	0	29	34	55	66	73	59	159	147	93	397	287	363				Ephx2	0.460155	3.80305	2.01293e-11	1365	1313	714	530	711	857	3560	4329	3477	7715	6410	6959	853	447	762	564	355	244
Gm7334	1.82379	0.214689	2.04492e-14	354	345	338	342	436	359	46	73	63	56	60	72	160	166	88	114	84	87				Rell1	0.193203	-1.43944	2.05814e-11	2887	2878	3347	3902	4170	3939	954	1143	1047	1066	1091	1027	2079	1828	1710	3959	3628	3439
Cyp3a25	-10.0921	0.832995	2.52988e-14	0	0	0	1	0	0	1016	1301	1144	4697	4236	4393	13	28	85	0	1	2				Clps	0.484428	4.48655	2.18307e-11	363	455	355	657	635	490	1518	1686	1929	922	695	808	25	72	433	22	18	8
Pros1	3.8784	0.439134	2.60588e-14	636	593	368	216	358	379	85	76	108	70	68	87	10	9	43	404	287	188				Agmo	0.41637	3.46295	2.20979e-11	666	838	617	586	506	619	965	1264	1209	2255	1957	2015	237	217	578	137	100	82
Foxn2	-1.56406	0.189524	2.67764e-14	384	435	358	504	419	401	1050	1102	1224	992	1020	1079	1059	1318	916	906	753	662				Gm5540	0.30498	-2.30553	2.2303e-11	1077	1113	888	741	658	713	844	868	770	1099	1198	1141	977	1171	1642	3607	4235	4602
Slc12a4	3.89223	0.40877	2.89424e-14	1177	947	802	789	1388	1041	15	32	12	27	34	28	163	156	46	81	97	51				Lgals9	0.363239	2.86162	2.39014e-11	6162	6379	5622	6609	7143	6613	10905	10544	10487	18561	20322	21446	8240	9150	12321	2150	2038	2163
Creb3l4	3.32089	0.390336	2.89702e-14	1378	1651	1901	2264	1883	1775	625	549	591	240	251	321	206	295	596	270	277	209				Plcd3	0.247378	-1.88221	2.68035e-11	2130	1895	1993	1609	1779	1894	247	377	236	364	389	312	1078	733	484	2396	1801	1741
Zfp260	1.10061	0.134961	2.89702e-14	2692	2545	2633	2357	2153	2356	1690	1671	1868	1377	1399	1483	1589	1585	1971	2009	1799	1607				Pros1	0.37354	-2.76713	2.79478e-11	636	593	368	216	358	379	85	76	108	70	68	87	10	9	43	404	287	188
Wfdc2	6.19452	0.581173	2.99761e-14	31577	29353	23459	17622	24723	28674	247	413	85	116	244	81	879	2480	882	10932	6873	2681				Arhgap8	0.304121	2.37864	3.03067e-11	870	979	911	744	854	812	594	538	484	317	371	367	169	238	329	57	94	26
Mtcl1	4.03751	0.435519	3.05595e-14	3073	3282	2103	1456	1538	1757	107	109	106	71	161	71	457	339	255	449	420	352				Vwce	0.832108	8.68535	3.04264e-11	3	4	7	3	6	5	460	535	397	1496	1602	1868	3	34	46	0	0	1
Kbtbd11	4.50092	0.522079	3.47377e-14	3356	3125	5496	3001	2250	3170	729	1089	931	559	492	465	68	45	593	576	1996	3014				Tspan1	0.302598	-2.29839	3.69223e-11	3973	4176	5471	6621	5829	6232	2980	3105	2752	3722	4068	4067	6618	6948	8624	20978	18666	17944
Naxe	1.41884	0.174572	4.11187e-14	2822	2742	2270	1997	2171	2441	1612	1780	1622	1049	1125	1431	1124	1060	1521	2093	1835	1664				Fabp1	0.928447	10.0663	4.11214e-11	0	0	0	2	0	0	14326	15846	10505	95187	81495	94768	6	61	97	0	9	2
Slc6a7	-7.14887	0.757852	4.1403e-14	0	0	0	0	0	1	397	340	282	86	145	148	118	223	215	141	135	123				Mylk3	0.779467	7.52128	4.18815e-11	1	1	0	0	4	1	413	392	382	203	180	242	18	21	30	0	1	0
Creld1	1.96407	0.232424	4.29363e-14	1757	1509	2014	1773	1609	1593	241	266	212	255	300	319	619	511	316	331	311	279				Cbx4	0.197683	1.45934	4.39454e-11	1268	1283	1259	1001	1145	1120	631	681	575	689	699	785	384	354	428	234	260	238
F2r	6.69419	0.580109	4.29363e-14	3490	2383	3984	2910	7150	8214	2	5	2	7	22	18	302	143	61	45	29	19				Fam129b	0.137432	-1.00369	4.67027e-11	9829	10108	8867	10439	14183	12007	3672	4264	4039	3592	4387	4217	11137	9640	5938	16443	12476	11056
Mapk8ip1	2.88344	0.342903	4.66199e-14	386	345	307	167	299	253	101	89	85	54	55	66	55	61	89	51	65	76				Reg3g	0.628838	6.27453	4.84105e-11	14955	13731	8911	3962	1630	2646	1297	1923	1990	2067	1887	2070	386	407	6090	0	11	3
Gm6212	2.91092	0.348509	5.08972e-14	285	315	322	209	224	259	111	100	119	72	53	62	28	47	76	46	44	19				Gm14851	0.807409	8.13541	5.20914e-11	0	0	0	0	0	0	844	804	1319	1130	904	1251	6	17	121	0	1	0
Ripply3	5.16342	0.522237	6.33164e-14	1613	2217	822	500	786	982	30	24	19	19	27	23	117	90	58	38	30	48				Tmem189	0.196304	-1.46147	5.20914e-11	1344	1573	1095	1366	1619	1346	256	239	205	213	212	257	209	238	97	1121	1082	955
Lamb1	3.57414	0.404808	6.4708e-14	3381	2782	3625	1308	2617	2880	243	430	280	298	339	291	371	266	486	48	42	28				Sash1	0.162994	-1.18389	5.22263e-11	2120	2366	2040	2426	2319	2016	1444	1699	1794	1207	1198	1255	2885	2812	2218	4373	3726	3446
Numbl	4.11287	0.442749	6.6032e-14	564	560	398	255	458	471	26	34	24	13	18	21	33	36	22	23	12	8				Ddhd1	0.162842	1.15234	5.49606e-11	1425	1372	1625	1686	2159	2085	967	1016	1058	1246	1409	1265	3741	3203	1247	1403	1047	1082
Arl3	1.29058	0.16001	6.88693e-14	741	636	635	533	627	578	368	422	420	291	333	309	375	367	461	463	437	383				Entpd7	0.358	2.64607	5.62147e-11	538	516	582	666	843	662	878	999	977	1921	2100	2131	686	709	384	529	385	359
Cck	-7.20933	0.68462	7.10236e-14	3	1	0	0	0	0	1396	1460	2060	701	546	552	99	92	601	7	12	8				Defa26	0.862258	7.60243	5.64081e-11	0	0	0	0	0	0	298	505	493	642	417	550	36	124	567	0	0	0
Serinc3	-1.55039	0.18928	7.37729e-14	10266	10480	13002	12846	11622	11258	43489	42544	44873	37629	39597	42921	34459	39075	43401	29316	30354	28284				Tspan6	0.369174	2.83888	5.9556e-11	702	524	404	420	685	737	216	252	309	263	217	214	242	155	206	34	53	20
Sult6b2	-9.74631	0.83851	7.93224e-14	0	0	0	0	0	0	799	1320	1632	2610	2061	2111	2	7	30	0	0	3				Als2	0.278002	2.09343	6.17648e-11	691	760	618	691	919	807	2717	3220	2182	3318	2703	3609	824	831	1485	660	560	518
Paqr5	3.0243	0.358153	8.24359e-14	3590	3645	1918	1574	2005	2019	479	518	369	479	392	395	374	295	464	3169	2772	3096				Snx24	0.151956	-1.0911	6.25809e-11	1021	1007	1027	1002	865	974	622	715	713	551	470	573	879	861	858	1450	1167	1307
Appl2	2.1955	0.266774	9.19168e-14	12145	12159	15674	12184	9314	11630	3811	4056	3770	2857	2761	2848	3605	2768	3680	9504	7893	6971				Rab11fip5	0.371782	-2.99837	6.40286e-11	2032	1786	2212	1554	3527	2788	7	27	16	10	24	33	1877	899	225	777	540	386
Epdr1	3.28148	0.373603	9.41803e-14	809	600	765	904	1109	1032	76	72	104	105	83	114	172	201	231	1	1	0				Gm17936	0.373354	2.87536	6.86827e-11	471	453	583	625	942	877	363	447	433	305	297	380	226	374	273	39	75	45
Sept5	-4.47519	0.48298	9.70151e-14	69	80	130	182	185	167	2987	2521	1707	3409	4008	4252	2998	2888	3748	2278	1728	2176				Ccdc134	0.237969	1.72261	6.87377e-11	449	468	401	360	407	384	1328	1334	1063	1437	1599	1501	623	968	531	593	560	464
Gfi1	-6.26197	0.676663	9.73889e-14	0	0	1	0	1	0	162	183	200	85	109	124	114	200	292	13	15	15				Cpox	0.218846	1.58524	7.58223e-11	2349	2467	2838	3537	2674	2665	4085	4782	3762	4569	4881	5292	2978	3026	2749	2177	1756	1681
4930404N11Rik	4.57067	0.488054	1.16041e-13	163	178	229	141	175	155	16	13	12	5	11	6	4	11	12	12	3	10				Acacb	0.473791	-3.57142	7.66773e-11	1391	1595	2771	1703	1045	1140	179	212	140	90	66	68	56	34	89	717	1001	1703
Xpnpep2	-5.04615	0.518215	1.22669e-13	1	7	5	6	10	6	734	673	566	734	789	793	237	379	1381	294	438	651				Ints6l	0.595925	-4.59049	7.79272e-11	153	142	168	48	23	19	124	122	151	38	36	37	54	57	122	1779	1420	1189
Slc25a15	-2.97068	0.347787	1.31165e-13	656	743	754	860	852	884	5955	6269	5794	8718	8096	9214	1372	2157	2272	1121	945	937				Adh6a	0.623464	6.00748	7.95583e-11	0	0	0	1	0	0	6801	7574	7208	19691	17969	18114	355	445	5723	50	68	36
Otub2	3.3011	0.387477	1.31606e-13	205	211	183	149	160	234	22	16	23	28	38	29	51	43	82	72	70	67				Mpp4	0.608653	5.35881	7.99602e-11	2	6	4	8	3	6	761	834	381	345	213	329	12	18	138	4	2	1
Crip2	3.83394	0.402914	1.36713e-13	3556	3504	3743	5752	8441	6654	41	85	50	67	94	76	1348	595	186	488	291	149				Anxa10	0.738003	6.44273	8.17444e-11	18479	21019	9202	13292	18995	16119	320	572	403	5856	5927	4011	2447	1895	1072	24	18	27
Laptm4a	1.33439	0.166938	1.37391e-13	13815	12788	10460	10867	14322	14234	6980	7195	7271	5767	5825	6750	6357	6004	7938	9187	8342	8318				Blnk	0.163296	-1.17564	8.60778e-11	840	936	811	952	859	864	2773	2912	2862	1954	2035	2027	2660	2635	2350	6217	5659	5595
Tmem182	-6.31054	0.683654	1.50855e-13	0	0	2	0	0	0	153	167	161	78	74	107	54	71	85	74	88	74				Defa37	0.708414	6.56893	8.74205e-11	0	0	0	0	0	0	539	655	911	891	653	764	59	155	1484	0	1	2
AY761184	-7.85638	0.813127	1.53397e-13	0	0	0	0	0	0	683	649	650	755	467	812	12	69	319	0	0	0				Hnf4g	0.430298	3.42075	1.01994e-10	169	242	124	207	96	98	3891	3975	4304	6581	6957	7103	871	1040	1869	504	308	332
Sdc1	1.77942	0.218357	1.57028e-13	37340	30588	40021	31450	43191	44089	8526	9869	8728	9340	9934	9577	14591	12238	11884	15562	13237	12291				Stk26	0.720121	7.03264	1.04795e-10	707	604	566	489	407	622	167	191	170	127	157	138	4	21	5	0	1	0
Snph	-6.32576	0.683337	1.58515e-13	0	0	0	0	0	2	271	231	213	144	153	180	51	57	178	24	29	9				Tnfrsf19	0.618006	5.16443	1.04795e-10	413	315	1255	923	1742	1667	191	233	387	270	260	316	98	129	62	0	11	13
Gpr155	-3.59401	0.4101	1.59957e-13	58	62	69	56	74	66	475	512	484	806	673	831	31	49	29	31	34	39				Arhgef3	0.158218	-1.13992	1.07804e-10	3223	3113	3445	3192	3431	3193	372	404	347	433	475	415	2093	1525	879	2106	1500	1303
Slc44a2	2.38471	0.284271	1.7188e-13	7716	7960	7739	6266	6966	7345	1148	1213	825	732	856	866	2872	2092	1327	2062	1710	1129				Hgfac	0.346308	-2.58795	1.12756e-10	11010	11918	13570	12445	10649	11595	1449	1933	1146	2299	2347	2021	2893	1741	3042	15395	13309	10349
Inha	7.96069	0.624288	1.96218e-13	556	457	571	203	317	317	2	7	1	0	1	0	0	2	1	1	1	0				Sult1a1	0.654154	-4.95636	1.22856e-10	49	42	26	4	14	10	27	32	36	10	0	3	0	4	11	185	531	297
Podxl	4.50407	0.482836	1.96218e-13	5025	4528	7258	6192	11527	9984	553	387	392	313	261	226	149	81	170	10	7	9				Cela1	0.384945	-2.86205	1.25172e-10	993	1404	569	1175	773	632	254	326	241	303	276	297	243	184	399	2369	2057	1030
Ppargc1b	-1.51263	0.188225	2.10327e-13	191	224	213	158	164	174	667	594	649	563	539	615	310	394	324	815	707	685				Elk3	0.315227	-2.42741	1.25172e-10	1628	1623	1819	1883	2968	2777	61	88	72	115	173	94	1606	1022	471	1503	1193	1287
Dapk1	4.90751	0.505765	2.17501e-13	1592	1344	1161	839	1324	1145	29	59	62	23	27	14	30	17	18	94	40	60				Snx18	0.161631	1.13934	1.35105e-10	958	1049	926	1198	1212	927	1221	1352	1406	1377	1510	1423	1686	1387	1141	917	850	810
Cyp2c68	-8.25475	0.730095	2.30244e-13	2	0	1	0	0	0	1238	1278	1279	1795	1757	2000	19	73	319	332	197	105				Khk	0.479676	4.01129	1.53441e-10	713	723	613	430	282	452	5148	6084	5729	13146	12034	14118	285	352	818	371	441	311
C3	5.74687	0.56875	2.43059e-13	2425	1243	2171	350	1257	1226	18	26	22	26	45	18	27	23	35	39	62	57				AL805899.1	0.322679	2.29908	1.60895e-10	617	557	434	314	425	426	278	238	282	272	291	282	637	460	184	164	73	81
Gprc5c	5.75861	0.608896	2.44476e-13	1829	1628	2949	597	1369	2236	196	176	282	28	34	36	3	5	44	2	3	0				Fam20a	0.8414	7.23806	1.69584e-10	1	2	1	3	2	0	524	571	532	150	122	167	149	170	470	0	0	0
Ace2	-8.45806	0.674745	2.78123e-13	8	3	0	4	3	4	3045	3832	4294	13786	12405	12006	237	584	3712	83	65	70				Gramd1a	0.357474	2.64018	2.11994e-10	1704	1557	1721	1148	1795	2318	143	129	157	78	87	109	160	109	98	29	23	16
Cpd	1.56491	0.196929	2.81564e-13	12457	14909	13555	15481	15325	14851	5765	6177	6214	5952	5966	6017	5646	6972	8101	10967	8434	8040				Gls2	0.383528	2.8488	2.13629e-10	276	195	346	444	346	366	438	379	285	446	392	635	170	249	168	86	51	92
Ces2e	-6.56529	0.589024	2.9471e-13	43	50	19	112	116	54	17583	17008	13832	24018	24954	25186	1116	1505	6517	3283	5827	5162				Dock11	0.267674	1.95507	2.16466e-10	4790	5082	4334	3710	3785	3992	1326	1721	1799	1115	1213	1307	1462	1964	1495	557	363	221
Nfatc2	1.99182	0.244508	2.97386e-13	1261	1297	1242	1101	1611	1510	288	330	288	191	228	226	517	539	348	717	460	495				Slc23a4	0.413203	3.27727	2.25383e-10	87	88	91	20	45	69	940	953	787	432	506	553	274	497	659	40	50	25
Kif3c	3.18212	0.375301	3.04057e-13	472	584	638	455	681	634	73	95	79	45	38	72	183	106	158	163	99	119				Mthfd2	0.224394	1.56127	2.34371e-10	1095	1144	1189	1916	1427	1053	1849	1950	2136	1891	1991	2333	3195	3034	1557	1210	1142	1092
Gm43697	-7.1369	0.802883	3.08587e-13	0	1	0	0	0	0	152	123	87	179	189	162	78	69	155	0	1	0				Paqr9	0.621853	4.79773	2.45684e-10	6	3	3	7	14	11	27	25	15	70	78	72	5	1	0	2	5	3
Prdm5	9.27187	0.769541	3.09373e-13	425	310	445	260	219	307	0	1	0	0	0	0	0	0	0	1	1	0				Shroom4	0.423687	-3.19645	2.59648e-10	317	242	337	294	317	364	37	52	28	12	16	12	154	93	99	307	247	328
Synj2	1.19041	0.151247	3.33194e-13	2187	2411	2564	1965	2060	2119	1147	1212	1175	909	984	1138	1879	1794	1859	3544	2800	2642				Mrps6	0.182761	-1.2947	2.66756e-10	548	612	424	584	550	448	347	394	363	323	444	434	536	523	407	1447	1232	1009
D930020B18Rik	4.322	0.487543	3.38808e-13	213	209	192	191	116	135	50	44	66	19	14	30	5	3	26	8	11	2				Rbms3	0.518431	3.94324	3.22287e-10	1313	1132	1833	1295	1650	2117	54	71	76	50	48	69	32	71	54	6	0	4
Irs1	4.62922	0.495972	3.46136e-13	940	976	732	704	1302	1371	13	26	58	23	16	28	269	139	149	175	182	103				Rcn1	0.578768	4.63404	3.35291e-10	74	43	47	26	30	24	173	174	189	95	128	157	23	94	76	1	4	4
Prom1	2.25362	0.278292	3.70888e-13	68450	68146	84967	53381	48227	61707	16098	17314	17360	12393	13632	13586	22455	15888	18704	41426	37622	41121				Barx2	0.601296	5.10373	3.78747e-10	163	202	430	101	102	169	460	524	496	160	184	195	124	177	238	3	2	8
Ddah1	-2.8345	0.350548	4.37876e-13	326	311	291	487	707	472	1310	1337	1188	1782	1958	1750	5333	5958	3010	6298	5360	5409				Hoxa2	0.506823	-4.0388	3.78912e-10	0	0	0	0	0	0	12	7	11	11	7	19	4	15	34	129	115	84
Bsg	3.0191	0.367928	4.5238e-13	258502	220915	266847	152595	108321	146086	42746	50531	32332	40320	38358	40200	26806	21112	42305	53955	59230	49884				Cyp2d10	0.444275	-3.47156	3.85903e-10	4	7	2	6	2	3	53	61	24	31	37	29	10	3	28	199	300	231
Disp1	1.78359	0.223792	4.5743e-13	1227	1372	987	1025	1296	1214	364	479	425	278	315	308	484	468	432	532	374	377				Fam43a	0.335138	-2.50807	3.96825e-10	945	1038	578	697	1245	1061	62	84	65	50	76	54	402	176	126	734	721	612
Pea15a	2.39831	0.288319	4.81892e-13	2821	3384	3114	2328	3882	3632	390	356	360	269	302	240	1232	935	452	1573	1216	1184				Casp6	0.164746	1.14993	4.08932e-10	1577	1593	1409	1160	1500	1436	1633	1896	1708	1848	1790	2048	616	748	761	814	838	753
Defa37	-7.50638	0.804613	5.01939e-13	0	0	0	0	0	0	539	655	911	891	653	764	59	155	1484	0	1	2				Mxra7	0.48081	3.92046	4.1586e-10	23	19	17	29	8	12	244	242	180	154	131	163	6	8	28	5	5	5
Ank	-3.58	0.412124	5.02309e-13	315	274	425	532	382	209	4377	4557	4112	5927	5343	5986	2141	2012	2641	3394	4109	3982				Dpysl5	0.563838	4.60982	4.36465e-10	31	28	27	22	22	26	419	371	382	152	103	170	13	38	23	13	5	2
Mypop	2.56114	0.315752	5.39519e-13	291	253	204	194	260	249	42	41	45	43	68	62	57	71	89	226	191	178				Cnfn	0.810323	4.05535	4.84373e-10	14	20	7	268	81	54	0	1	0	37	43	16	739	114	0	3	1	2
Fmo4	-5.5107	0.555251	5.82306e-13	9	9	1	9	2	4	619	603	787	869	884	986	20	41	95	7	13	3				Nek7	0.21277	-1.48024	5.28951e-10	3697	3920	2814	2380	2630	2921	1202	1305	1274	904	923	1027	1395	1243	994	4210	3172	3115
CT010496.1	7.50308	0.794354	6.23257e-13	71	48	56	16	18	18	0	1	0	0	0	0	0	1	6	1	2	2				Ly6g6e	0.405795	-3.07707	5.53135e-10	102	166	57	85	91	111	26	51	31	19	23	38	61	37	39	405	337	235
Arhgef40	3.00064	0.3577	6.32795e-13	3511	3220	2488	3012	4091	4084	353	358	267	318	389	355	2214	1303	1739	3626	2370	1481				Nlrx1	0.256779	-1.82294	5.94394e-10	203	191	177	126	165	211	78	108	72	63	68	100	285	241	169	414	422	308
Maf	-5.3207	0.55114	6.74257e-13	6	4	3	15	8	8	639	717	688	781	576	528	276	138	588	363	244	121				Cyp3a11	0.875672	8.34882	6.41847e-10	0	1	0	3	0	1	1072	1339	1036	1997	1430	1341	3	11	267	0	0	0
B4galt5	-2.25295	0.276038	7.32336e-13	371	304	479	274	349	281	2214	2436	3018	2484	2583	2689	1170	1352	1961	2106	1933	1751				Slc2a2	0.880033	9.52067	6.62803e-10	0	0	0	2	0	1	1574	2086	2220	10847	8681	9980	8	13	107	0	1	1
H2-DMb1	5.27037	0.585726	7.34169e-13	230	157	194	121	118	126	10	14	9	6	2	3	22	21	55	18	22	85				Aldh1a3	0.602847	-5.29919	6.92255e-10	920	1022	542	565	443	959	15	19	4	34	95	51	1241	711	593	3967	3120	2434
Vps13c	1.94833	0.250711	7.34928e-13	2213	2281	1647	1865	1771	1434	1018	1124	1356	723	796	904	1331	1624	2836	3024	2035	1803				Slc16a6	0.390906	2.74003	6.99371e-10	402	386	702	1125	1120	911	1400	1460	1612	2263	2357	2653	2033	1789	1063	633	472	464
Rbp2	-9.14793	0.709966	7.53959e-13	2	11	10	0	16	12	5156	7467	5764	30815	29566	30163	335	423	823	155	177	139				Slc41a1	0.174093	-1.18132	7.11137e-10	2083	1879	2384	1900	2108	2363	890	899	879	562	635	821	929	968	1213	1672	1627	1397
Slc36a4	2.62763	0.323521	7.76765e-13	513	510	434	388	425	460	71	81	77	82	70	67	484	352	396	191	204	326				Dact1	0.601823	-5.31495	7.21494e-10	14	12	10	7	4	0	10	30	14	7	7	10	62	34	18	475	900	918
Btnl6	-7.45087	0.662043	8.03417e-13	2	6	2	2	0	0	1116	1352	1269	3093	2734	2743	136	171	1212	860	1113	1286				Mtfp1	0.176492	1.21555	8.14767e-10	359	408	301	401	395	374	679	700	757	683	679	762	255	356	371	320	294	257
Lhpp	-2.18295	0.264485	8.04478e-13	176	189	165	120	150	167	2653	2712	2919	1403	1435	1722	514	765	1427	232	251	317				Car1	0.959531	-10.1297	8.36704e-10	0	0	0	0	0	1	39	4	6	49	0	1	432	146	861	125832	86756	93431
Gnai1	6.14834	0.601143	8.12381e-13	925	900	847	1395	1356	1155	18	14	35	5	9	2	18	5	22	189	146	72				Apoa1	0.874324	9.24484	8.63481e-10	1	5	2	0	1	2	8737	11490	9037	75943	68886	56587	77	538	3824	0	12	3
Acot2	-2.43047	0.305009	8.42575e-13	63	70	87	87	80	65	214	263	212	220	247	319	118	83	54	77	98	79				Plekha3	0.162355	-1.10559	8.857e-10	1025	921	862	927	1124	954	944	1027	1096	1033	1142	1166	1253	1361	1505	2433	2287	2362
Brpf3	-1.6955	0.213323	8.52809e-13	1096	1252	909	643	799	910	4646	4422	4317	3733	4217	4544	3144	3477	4104	5380	4626	4262				Slc26a2	0.286328	-2.0009	1.04328e-09	13090	16041	7206	10190	14863	17743	4718	4368	3873	4097	4304	3798	5401	5229	5181	20917	18821	17498
Slco2b1	-8.1609	0.720705	8.606e-13	0	1	0	3	0	0	2077	1897	1703	2296	2447	2972	7	18	155	7	23	30				Fhl1	0.66921	-5.04525	1.08085e-09	73	150	25	9	8	6	78	97	90	44	47	29	28	17	74	1749	2331	1006
St3gal5	5.50673	0.552451	9.49021e-13	696	650	476	335	501	514	16	30	29	5	5	8	9	7	8	0	0	0				D630011A20Rik	0.473757	-3.74298	1.12505e-09	9	12	12	13	17	16	1	9	6	1	5	1	52	41	18	150	100	72
Cd9	1.83493	0.231334	9.62697e-13	9466	10451	8651	10427	11829	10706	1880	2228	1818	2337	2522	2587	5642	5342	4639	13744	11001	9006				Gm7849	0.881609	7.64555	1.12535e-09	0	0	0	0	0	0	200	295	525	762	594	672	52	181	775	0	0	0
Cyp4f14	-7.6255	0.637893	9.68442e-13	29	37	34	23	26	35	6560	6993	5874	37025	32352	31393	769	1376	4763	2515	2928	3643				Slitrk6	0.675329	5.54076	1.13552e-09	0	0	1	1	3	0	165	220	195	95	108	86	92	101	230	0	1	2
Dnajc18	1.53042	0.197183	9.95189e-13	929	903	823	810	711	826	427	444	466	286	301	337	408	434	449	512	404	470				Epdr1	0.640128	5.84763	1.18882e-09	809	600	765	904	1109	1032	76	72	104	105	83	114	172	201	231	1	1	0
Gucy2c	-7.14489	0.626287	1.00058e-12	26	56	37	72	2	5	12216	13000	13019	11407	12346	13647	5496	7655	11229	8368	8509	9338				Wfdc2	0.552227	-4.27259	1.21156e-09	31577	29353	23459	17622	24723	28674	247	413	85	116	244	81	879	2480	882	10932	6873	2681
Gstp3	-4.57155	0.50936	1.01221e-12	39	44	21	62	20	17	535	575	424	743	1000	1011	837	643	586	617	443	318				Cd14	0.358506	-2.48518	1.217e-09	4903	3725	3287	1481	2913	3272	284	347	376	161	222	210	669	485	640	1573	1306	1273
Cabp1	-4.67692	0.559016	1.07178e-12	1	0	0	6	0	2	60	57	60	49	51	65	89	113	101	5	9	15				Nmnat2	0.45285	-3.37655	1.24783e-09	34	43	20	33	33	29	23	29	37	15	11	5	30	34	29	175	223	209
Tanc2	3.53003	0.423162	1.10976e-12	2508	2234	2886	1790	1409	1625	281	346	413	179	161	191	295	293	326	154	121	232				9230105E05Rik	0.659051	-6.34452	1.34441e-09	0	0	0	0	0	0	7	11	6	0	3	1	1	0	7	349	409	113
Lrg1	9.92768	0.652072	1.13556e-12	4303	4831	4008	1072	1354	2095	1	3	1	2	0	1	0	2	0	15	6	9				Emp2	0.169452	-1.14994	1.54558e-09	8591	8044	8242	9746	8136	7667	2751	2979	2475	2772	2865	3247	8611	6249	5190	11524	8257	7698
2610528A11Rik	-7.22984	0.641279	1.16731e-12	2	7	14	15	12	0	2692	2846	1226	4272	4609	3926	4215	2103	9498	21115	30146	25850				Akap13	0.168027	-1.13195	1.55829e-09	3175	3272	3090	2804	3593	2917	2526	2731	3108	1985	2124	2239	4449	3498	3672	7174	5113	5608
Arhgef26	-2.21709	0.27765	1.276e-12	534	390	721	534	556	391	2685	2934	3203	2507	2510	2803	1995	2422	2202	2054	1918	1978				Rcbtb1	0.202059	1.38303	1.58632e-09	2646	2681	2853	3391	3361	3016	4833	4443	5081	3127	3394	4031	1958	2810	2821	1518	1451	1350
Kctd17	4.10505	0.487465	1.3769e-12	199	273	312	203	197	334	41	40	51	13	18	13	8	17	26	450	363	387				Tspo2	0.488816	3.62694	1.58632e-09	40	37	45	29	14	15	161	169	84	136	115	112	45	51	60	9	9	5
Aldh4a1	2.20617	0.273531	1.37967e-12	774	713	657	621	867	806	89	136	84	96	91	89	309	306	151	485	544	374				Syde2	0.283096	2.00418	1.79212e-09	277	315	398	376	279	279	2462	2424	2495	1229	1371	1633	544	821	1147	412	297	263
Creb3l1	3.16293	0.39725	1.37967e-12	4796	5840	5993	4745	4388	4926	2139	1949	1326	712	964	1072	1187	1713	3366	1326	1179	533				Card11	0.475119	3.9721	1.90812e-09	0	1	0	0	0	0	1670	1453	1245	536	586	736	7	48	329	14	14	3
Cep85l	6.4944	0.633067	1.40507e-12	142	161	93	128	110	88	1	2	3	3	0	0	2	2	4	2	1	1				Ctnnbip1	0.220719	1.51471	1.93763e-09	563	531	385	320	480	495	797	799	709	589	668	735	258	356	375	238	254	154
Zfp667	2.43992	0.310562	1.40507e-12	222	190	165	165	190	182	73	79	51	53	57	36	57	45	89	168	197	161				Tgfb1	0.20624	-1.38785	2.04314e-09	854	826	769	702	899	856	315	341	222	299	297	302	560	428	524	1088	801	726
Defa26	-7.64211	0.822377	1.44993e-12	0	0	0	0	0	0	298	505	493	642	417	550	36	124	567	0	0	0				Ranbp17	0.795	-8.63343	2.05195e-09	32	23	60	15	57	33	0	0	0	0	0	0	0	0	0	151	380	471
Arid5a	2.78908	0.333457	1.45386e-12	695	650	821	734	1281	887	29	60	50	48	60	47	622	357	196	555	531	588				Cdr2	0.532433	3.94864	2.06357e-09	337	298	279	571	561	409	1091	1216	1195	4467	4550	4456	401	484	332	258	242	225
Ifit1bl2	-8.75097	0.789153	1.59456e-12	0	0	0	1	0	1	176	203	325	1733	1365	1155	157	189	254	25	30	27				Lamb1	0.376845	2.75261	2.18615e-09	3381	2782	3625	1308	2617	2880	243	430	280	298	339	291	371	266	486	48	42	28
Smpd1	2.14957	0.274971	1.60681e-12	1425	1274	1247	809	1116	1110	427	487	399	273	298	301	379	355	419	616	480	675				Mmp15	0.276926	-1.89374	2.26553e-09	12453	13278	12147	12867	15899	17420	2189	2755	2919	3456	3741	3326	6288	5420	6743	13029	13694	12747
A730020E08Rik	-3.51261	0.430932	1.69645e-12	15	10	12	15	11	7	59	122	135	79	105	136	127	177	83	92	88	75				Tcaf1	0.297326	-2.01696	2.43943e-09	1215	1154	1133	993	1388	1075	562	554	633	279	246	345	551	544	541	1727	1544	1716
Arl6	2.63087	0.325537	1.7035e-12	581	595	351	335	420	423	56	63	77	71	80	64	116	106	92	209	188	171				Sephs2	0.30187	2.03083	2.44338e-09	2935	3086	2919	4676	4730	4215	6782	7771	6048	10208	10455	11403	7269	8562	5455	3603	3016	3174
Sstr2	4.28508	0.512305	1.71197e-12	135	152	218	119	107	86	45	46	47	25	19	10	6	5	44	10	24	9				Tst	0.308037	-2.1262	2.50089e-09	1429	1783	1542	1683	1561	1418	403	549	328	651	571	700	335	452	423	3065	2663	2340
Adam28	8.22658	0.666536	1.85897e-12	5544	5712	4846	2497	3401	4534	0	0	0	4	13	13	18	21	13	25	24	54				Upk1a	0.411966	-2.95778	2.51023e-09	30	43	19	27	40	18	14	21	19	13	22	13	15	19	28	95	100	144
Adgrg2	7.21593	0.594735	1.88977e-12	2266	2750	1207	814	1228	1395	12	7	14	8	7	6	3	3	2	2	0	14				Aldh4a1	0.234643	-1.60269	2.68432e-09	774	713	657	621	867	806	89	136	84	96	91	89	309	306	151	485	544	374
Pitpnc1	2.96099	0.363786	1.99718e-12	1484	1412	1522	917	1411	1249	169	251	242	97	108	167	575	489	410	615	498	611				Gm15998	0.801748	-6.05712	2.79137e-09	3	3	2	1	2	1	0	0	1	0	0	0	0	0	4	15	36	24
Gm45889	-6.26431	0.699143	2.0144e-12	1	0	1	0	0	0	111	119	104	125	116	136	211	479	555	292	186	102				Lemd1	0.753157	-4.97892	2.79137e-09	1437	1331	1398	958	1040	1338	0	0	0	0	0	0	135	71	14	68	40	40
Degs1	1.78508	0.229276	2.28036e-12	5727	5247	6368	5213	5972	5466	1426	1510	1667	1322	1449	1566	1483	1280	1129	1947	2273	2722				Ggt1	0.633125	5.77557	3.02499e-09	107	90	30	40	43	45	895	1273	746	3034	3091	2890	8	28	101	24	16	7
Hnf4g	-4.32687	0.477852	2.28036e-12	169	242	124	207	96	98	3891	3975	4304	6581	6957	7103	871	1040	1869	504	308	332				Cfi	0.644241	5.64083	3.16688e-09	5624	6550	7834	2411	2896	4825	774	856	717	120	157	185	47	31	61	8	3	2
Baiap2l2	-2.9646	0.363391	2.35677e-12	614	618	879	590	946	457	6805	6548	6615	4242	5283	6296	3780	5153	4383	3611	1827	1655				Ppp2r3a	0.293922	2.01825	3.20424e-09	1607	1916	1776	2119	1165	1198	4208	4334	3116	4793	4292	4355	3521	3553	3901	1094	960	1049
Zfp607b	2.37789	0.314243	2.4883e-12	156	141	143	88	71	106	110	92	91	59	69	67	23	33	96	107	90	93				4732471J01Rik	0.395905	-2.9091	3.24894e-09	37	28	44	31	24	30	15	17	7	9	6	12	38	23	20	143	100	100
Bend7	3.80086	0.470402	2.82026e-12	430	364	388	174	323	462	239	259	335	117	121	125	3	5	63	1	0	0				Sppl2a	0.24859	-1.6819	3.47837e-09	6778	6977	7444	9566	8461	8415	4909	5833	5505	6505	6598	6487	10460	8513	9903	20855	22630	24152
Sh2d3c	2.35871	0.302198	2.83274e-12	387	334	257	207	314	302	89	90	72	81	86	60	109	87	136	215	182	193				Apoa4	0.919491	9.28714	3.60368e-09	0	0	1	1	0	0	11586	11953	7425	129819	123181	103130	11	156	363	5	25	3
Gm12320	-4.65887	0.536098	2.85514e-12	2	4	1	3	5	6	187	170	152	148	138	158	51	108	116	108	62	29				Arg2	0.450811	3.73026	3.67701e-09	92	79	61	42	26	42	2295	2579	2069	3649	3453	3940	9	13	39	87	135	127
Gabrp	9.78586	0.796178	2.895e-12	1905	1960	3761	961	1677	4286	0	0	0	0	0	0	13	12	1	824	447	267				Gm1673	0.594888	-4.87138	3.68892e-09	29	26	24	112	111	53	17	16	10	12	17	9	49	22	48	427	427	977
Hnf4a	-1.68151	0.215835	2.93763e-12	7708	8110	6980	7094	7861	7735	36992	36073	33179	36207	39855	41499	18360	21851	33478	38900	33212	29838				Rab13	0.158633	-1.04128	3.88728e-09	448	452	362	363	472	427	189	258	238	168	184	247	340	386	318	514	481	459
Oaf	2.06105	0.26638	3.30634e-12	1579	1368	1762	1152	1640	1976	531	560	614	454	502	511	257	304	394	123	83	108				Defa36	0.755822	6.94571	3.92846e-09	0	0	0	0	0	0	429	710	1115	967	659	826	66	161	1579	0	2	0
Tirap	1.17809	0.154955	3.31759e-12	2025	2063	1855	1759	1903	1846	682	780	861	636	632	706	1355	1212	915	1626	1335	1505				Adh4	0.899284	8.25619	4.21512e-09	0	0	0	0	0	0	1117	1149	786	1257	1109	1321	1	4	119	0	0	0
Defa36	-7.62174	0.816375	3.41566e-12	0	0	0	0	0	0	429	710	1115	967	659	826	66	161	1579	0	2	0				Gfi1	0.364802	2.48517	4.53973e-09	0	0	1	0	1	0	162	183	200	85	109	124	114	200	292	13	15	15
Acacb	4.44581	0.520387	3.58459e-12	1391	1595	2771	1703	1045	1140	179	212	140	90	66	68	56	34	89	717	1001	1703				Slco2b1	0.553731	4.90438	4.88394e-09	0	1	0	3	0	0	2077	1897	1703	2296	2447	2972	7	18	155	7	23	30
Ugt1a1	-6.2461	0.59639	3.58459e-12	3	13	5	3	3	1	1722	1478	1278	2175	2274	2144	96	174	863	164	356	517				Ggh	0.233653	-1.52726	5.29994e-09	2278	2304	2162	1818	1699	1870	1201	1352	1096	1205	853	936	269	182	323	3135	2825	2218
Agr2	3.86292	0.476358	3.6683e-12	27747	25954	48995	68730	49127	43827	9109	8980	8572	6268	7678	7337	4947	7138	28716	3072	3409	1998				Cps1	0.816499	7.82378	5.66651e-09	0	0	1	7	0	0	60763	61589	64213	59980	56787	79420	911	8169	29138	6	80	25
Gadd45g	2.06365	0.261951	3.78299e-12	542	629	671	595	604	711	104	127	118	113	111	107	140	114	85	128	155	155				Lyz1	0.805264	7.19419	5.70841e-09	9	3	295	86	106	247	26021	26934	29565	29671	24148	28369	9541	19439	61950	26	53	13
Tff2	8.01545	0.735534	3.87937e-12	46036	56603	19183	33574	26116	17360	133	145	167	8	3	7	5	16	22	0	5	1				Samhd1	0.165764	1.08532	6.08988e-09	1265	1198	1043	1371	1334	1481	4064	4079	3928	3181	3133	3773	1497	1876	2192	1733	1420	1518
Far1	2.02685	0.259425	3.925e-12	10189	10690	7417	6135	8292	9130	1894	1795	1766	1389	1569	1458	3503	3657	2072	4760	3816	3544				Cntnap1	0.390941	-2.70341	6.31996e-09	104	63	103	31	69	64	313	217	254	105	136	156	366	380	397	1277	1063	1001
Rgs17	5.78161	0.558797	4.26911e-12	741	834	344	594	958	754	16	19	27	6	4	11	6	3	6	2	4	3				Prom2	0.504002	-3.42407	6.80049e-09	348	466	433	461	374	344	0	6	0	6	7	3	31	14	40	51	59	30
Tex15	6.75427	0.638257	4.36914e-12	258	224	327	199	302	389	0	0	0	2	3	4	6	1	6	5	7	3				Cd200r2	0.714565	-5.91025	6.98969e-09	0	0	1	1	5	4	3	9	0	2	2	0	27	31	55	152	185	316
Hacd4	4.8294	0.465342	4.47493e-12	1432	1309	1735	1651	1787	2348	5	4	5	9	22	18	80	32	9	60	40	51				Gm43697	0.803962	6.66617	8.81312e-09	0	1	0	0	0	0	152	123	87	179	189	162	78	69	155	0	1	0
Kctd1	3.14921	0.391242	4.6303e-12	245	249	314	148	261	263	35	39	57	23	23	36	40	41	46	119	112	85				Gpld1	0.286779	1.97789	9.2967e-09	658	613	509	419	367	478	2058	2256	2332	925	1114	1378	504	823	978	275	287	222
2510009E07Rik	3.93042	0.5338	4.73813e-12	276	243	90	70	69	113	121	129	135	27	24	30	10	24	165	7	13	19				Pla2g12a	0.165137	1.05975	9.81263e-09	1031	1001	1233	1103	1029	1031	905	960	949	722	708	875	774	793	557	505	524	468
Gpc1	4.06666	0.441566	4.84131e-12	1872	1578	1985	1960	3366	2958	26	40	24	48	65	49	100	76	33	650	436	209				Tle3	0.169497	-1.07154	9.92581e-09	4221	4888	4231	3051	4093	4503	3240	3533	3413	2037	2454	2432	3186	3418	5357	4812	4067	4158
Plet1	4.65277	0.533393	5.27478e-12	1344	1339	677	285	340	479	37	57	44	41	53	43	76	59	119	43	61	80				Hoxa6	0.833515	-7.41172	1.0082e-08	0	0	0	0	0	0	0	1	1	0	0	0	0	0	3	162	134	54
Stox2	3.11393	0.379999	5.27478e-12	908	795	783	854	1174	1109	106	106	149	59	95	56	210	237	174	33	20	33				Tkfc	0.537371	4.1521	1.046e-08	921	842	987	796	892	899	17462	18230	18080	59537	56899	61398	2800	3526	9491	1862	1503	1026
Card11	-7.10437	0.764405	5.46654e-12	0	1	0	0	0	0	1670	1453	1245	536	586	736	7	48	329	14	14	3				Bex1	0.547348	3.75542	1.10931e-08	101	74	60	93	54	31	69	65	61	46	62	40	878	1038	666	1	9	1
Gsto1	3.35712	0.406844	5.49047e-12	204346	209329	101004	81306	94016	138815	10807	11959	11152	14137	14949	14613	9959	10282	8858	18818	15045	13168				Zfp52	0.268208	-1.83523	1.1202e-08	963	898	1104	1209	1167	1167	38	55	41	63	106	70	561	354	144	805	527	421
Cdk19	1.64124	0.216874	5.65087e-12	3755	4007	4351	3498	3010	3067	1452	1560	1511	1061	1247	1148	2084	1849	1929	3155	2593	2596				Scarb1	0.295782	1.90612	1.13043e-08	2290	2317	3180	2909	3266	3080	5239	5346	4334	8187	4496	7972	1198	1003	598	2957	2581	2299
Ern2	3.55003	0.453503	5.74658e-12	5843	7245	4424	3862	3040	3154	1572	1421	1556	475	594	634	574	756	1548	1174	1031	484				Art2a-ps	0.651492	-4.22331	1.15489e-08	0	0	0	0	0	0	5	4	12	2	5	5	2	5	173	10	23	53
Rhobtb2	1.41166	0.187459	6.20208e-12	2336	2224	1950	1539	1915	1918	829	904	889	695	653	715	818	869	699	1180	971	926				Gm3776	0.543772	3.85613	1.16294e-08	2087	2904	730	1771	1179	539	3238	3670	2931	7773	8304	8487	2064	1255	712	654	450	501
Shisa5	1.80304	0.239302	6.38916e-12	8878	8914	7557	5371	6551	7132	3814	3762	3130	2493	2628	2830	3787	2880	4321	5793	5409	5849				Defa-ps1	0.794221	7.11695	1.24913e-08	0	0	0	0	0	0	160	486	885	818	567	709	49	119	516	0	1	1
Gm45716	-6.35307	0.771098	6.85214e-12	0	0	0	1	0	0	152	163	155	70	71	94	50	84	103	10	16	29				Rnf180	0.668797	-5.18524	1.33468e-08	3	2	0	0	5	3	3	4	5	1	0	1	314	319	374	194	135	32
Cps1	-10.9091	0.76714	7.02291e-12	0	0	1	7	0	0	60763	61589	64213	59980	56787	79420	911	8169	29138	6	80	25				Itgb8	0.705229	-6.31292	1.46632e-08	16	12	33	81	128	87	2	1	2	0	1	1	92	145	22	852	371	223
Crybg2	-2.59195	0.334403	7.52114e-12	542	576	498	846	569	470	1944	2227	2346	2837	3119	3234	2492	2338	1784	1644	1623	1830				Hkdc1	0.678944	6.29585	1.47329e-08	727	702	381	120	92	116	3966	4455	3236	14090	14506	14376	260	722	3702	35	51	19
Hsd3b3	-5.74696	0.765404	7.70066e-12	0	0	0	0	0	0	90	81	90	38	55	45	92	87	168	922	1148	1752				Greb1	0.348359	-2.42661	1.51604e-08	2	2	3	4	6	8	2142	2166	1498	1054	964	1151	2594	2207	3080	5975	6199	7187
Myo7b	-6.83255	0.645863	8.06147e-12	23	28	42	305	60	24	15783	16067	15533	15439	17084	17502	15790	13542	18088	14950	11760	12607				Slc2a5	0.662267	5.6779	1.55113e-08	52	42	38	22	59	21	1054	1257	870	5860	4508	5520	26	47	134	15	29	49
Dhx40	1.08938	0.147157	8.19893e-12	2641	2579	2074	1877	1998	2019	1477	1410	1482	1131	1303	1325	1464	1392	1668	1612	1355	1361				Ccdc141	0.257235	1.66239	1.57164e-08	4324	4343	5071	4841	4739	5263	164	167	215	207	262	230	224	345	155	128	93	96
Cth	-3.21637	0.399798	8.56486e-12	401	418	401	730	390	299	2911	3325	3004	4070	4250	5008	2562	2769	2398	1598	1793	1871				AC171111.1	0.72158	5.82654	1.57814e-08	0	1	0	6	0	1	1195	1227	1637	216	225	292	118	159	148	3	7	5
Grasp	2.22351	0.289324	8.59653e-12	2423	2396	1758	1337	1735	1658	456	551	465	283	380	406	886	850	714	1189	800	793				Cfb	0.271167	1.78918	1.68144e-08	19	32	33	17	17	13	230	263	258	217	218	244	96	103	211	35	54	40
Npdc1	1.61795	0.215034	9.01906e-12	4382	4192	3864	3403	4021	3776	1283	1297	1096	1410	1497	1383	1947	1729	1948	2322	2166	2059				Slc2a13	0.947003	-7.64417	1.68737e-08	0	0	0	0	0	0	1	1	0	5	0	0	1	19	146	569	798	734
Cacna1b	3.95306	0.49025	9.5421e-12	239	330	159	111	132	167	37	43	54	12	16	18	15	25	38	9	8	8				Gsap	0.46278	-3.35251	1.70164e-08	2567	2159	2248	1205	1154	1691	37	61	62	94	164	92	789	558	388	1483	1301	1651
Arhgap24	4.35807	0.528133	9.64741e-12	385	393	197	180	154	144	36	53	69	10	25	20	7	20	36	2	2	1				Sowaha	0.463237	3.3	1.71321e-08	435	436	453	524	500	497	466	579	527	969	1084	923	466	543	835	123	75	27
Pllp	2.53776	0.334625	9.87361e-12	3427	4195	1890	2065	2052	1781	1113	1126	915	601	741	703	343	350	573	947	849	775				Nans	0.244645	-1.59392	1.87665e-08	2152	2161	2102	2702	3003	2373	2364	2528	2319	2762	3120	3217	3990	4583	4065	13625	10528	7465
Slc35f2	-4.62727	0.528553	1.02385e-11	30	17	7	39	83	32	917	1091	1068	751	766	906	269	324	277	399	305	259				Rhou	0.279707	1.82328	2.00902e-08	2766	2744	1843	1521	2171	2019	1287	1396	1425	1663	1656	1494	1385	859	1041	528	427	485
Dnal4	1.08732	0.147708	1.06915e-11	877	854	777	632	731	794	518	583	531	389	398	506	455	504	540	619	529	500				Defa34	0.807689	7.11133	2.20318e-08	0	0	0	0	0	0	426	493	839	899	639	775	59	146	1610	0	1	0
Dhrs4	-2.32164	0.299958	1.15024e-11	750	907	835	782	860	752	4345	4894	4269	4957	5219	6260	792	1569	1300	1191	1286	1151				Atp11a	0.28511	-1.86002	2.27943e-08	2683	2737	1741	1522	1975	1751	988	1317	1071	957	1159	914	4416	2958	2668	4201	4429	5345
Rab34	2.80695	0.34885	1.15024e-11	1141	982	1015	814	874	880	108	140	67	63	112	86	208	148	101	66	69	46				Trim6	0.421006	-3.11789	2.42041e-08	409	347	411	412	427	436	11	8	25	25	56	20	179	109	42	511	515	561
Cybrd1	3.30298	0.426322	1.16121e-11	36074	42714	34521	22465	17941	16040	12455	17047	8181	9894	5798	7123	641	539	2160	11	24	14				Gm13131	0.397488	2.72133	2.47212e-08	70	88	51	72	52	77	118	113	126	95	100	112	14	26	74	12	5	7
Adk	-1.08769	0.147389	1.1715e-11	1273	1073	984	1174	1304	1064	2336	2417	2200	2045	2196	2203	3046	2847	2562	4986	4357	3522				Rdh16	0.581875	-4.56559	2.47212e-08	1	1	5	0	0	1	6	5	2	13	6	11	5	8	16	211	164	121
Tac1	-7.05547	0.736275	1.17478e-11	0	2	0	0	0	0	860	1078	1637	421	362	499	20	54	236	51	41	25				Slc8b1	0.223359	-1.42995	2.50791e-08	596	571	504	412	501	481	420	511	375	298	358	303	856	716	537	1554	1278	988
Abcg2	-4.80576	0.52015	1.20763e-11	18	43	34	69	30	66	2015	2177	2113	3043	3312	3041	673	848	2228	1019	1029	743				Efr3b	0.632389	4.7098	2.56154e-08	43	55	54	25	23	21	88	101	134	382	328	389	38	70	48	10	10	3
Shf	1.69949	0.226664	1.21118e-11	764	720	560	665	897	722	231	252	252	183	188	216	590	567	553	723	441	546				Tnfrsf1b	0.208753	-1.34806	2.56786e-08	1148	1191	1012	1706	1311	1269	610	596	563	624	788	773	1887	1774	1032	3130	2399	2886
Maged2	3.03975	0.384002	1.32447e-11	2222	1742	1555	1373	1968	1946	314	351	350	165	137	177	400	330	318	215	243	180				Ffar4	0.270264	-1.68355	2.633e-08	1653	1687	2098	1213	1469	1616	260	271	225	138	195	173	384	350	486	463	535	675
Filip1l	1.65032	0.218797	1.38677e-11	3210	2887	3170	2784	2949	2782	748	787	901	563	655	590	1448	1395	817	1355	1164	1218				Htr6	0.656628	4.85006	2.64677e-08	101	97	135	93	76	78	81	91	40	127	136	120	59	23	97	4	1	1
Dzip1l	5.21205	0.529062	1.38877e-11	1919	1778	1810	1527	1652	1831	18	12	7	20	46	33	25	43	18	12	10	2				Defa5	0.806596	7.00793	2.72115e-08	0	0	0	0	0	0	301	562	874	757	509	662	50	128	1219	0	1	0
Erich3	7.14307	0.65827	1.46651e-11	629	463	299	402	200	307	0	4	1	0	1	3	6	3	3	15	8	25				Defa31	0.906917	7.28575	2.87093e-08	0	0	0	0	0	0	171	196	221	563	395	457	20	31	234	0	0	0
Med13l	1.38426	0.188789	1.54027e-11	4103	4036	3579	3311	3575	3206	2196	2445	2752	1582	1673	1863	2124	1964	2658	2478	2068	2376				A930038B10Rik	0.458083	3.13621	2.98675e-08	35	21	20	25	31	28	169	165	156	358	295	378	51	49	60	43	28	23
Slitrk6	-5.47447	0.639148	1.60146e-11	0	0	1	1	3	0	165	220	195	95	108	86	92	101	230	0	1	2				Epha4	0.290582	-1.89974	3.21785e-08	680	619	998	1108	1080	1155	440	579	484	365	393	337	2063	1596	1333	2646	1994	2138
Rpia	-1.20286	0.164192	1.68689e-11	1265	1374	1237	1560	1449	1336	2529	2811	2545	2475	2722	3084	2226	2507	1956	2155	1761	1508				Prkar2b	0.519452	3.53875	3.28407e-08	738	744	1229	950	714	895	71	70	95	46	60	47	111	56	153	4	5	2
9530026P05Rik	7.9545	0.759296	1.80306e-11	163	130	153	96	67	60	0	0	1	0	0	1	0	0	1	0	0	0				Gm37145	0.244236	-1.56828	3.31468e-08	451	385	375	395	327	358	50	82	73	71	85	71	139	93	79	362	283	263
Pamr1	7.15396	0.726348	1.86765e-11	1039	691	408	9	52	92	14	8	3	0	0	1	1	1	28	1	1	0				Kbtbd11	0.478071	-2.81938	3.31468e-08	3356	3125	5496	3001	2250	3170	729	1089	931	559	492	465	68	45	593	576	1996	3014
Fzd1	4.68899	0.542174	2.01322e-11	869	693	988	501	925	1015	31	47	77	14	13	16	87	43	74	1776	1551	1466				Fam174a	0.194039	-1.19398	3.37635e-08	557	550	458	441	549	527	244	326	290	248	252	230	260	210	389	487	444	522
Rgn	-2.75379	0.346908	2.01928e-11	69	74	112	71	58	62	863	875	666	741	865	1051	99	107	179	124	139	97				Rdh7	0.777613	7.59042	3.45366e-08	5	18	2	0	1	2	968	1091	997	1769	1292	1687	2	6	52	0	2	1
Acot4	-6.05936	0.621208	2.02861e-11	11	12	5	9	5	2	278	329	296	1001	1144	1110	93	115	110	244	244	281				Gsta2	0.559893	3.82743	3.4906e-08	2275	3629	845	2135	1202	623	2924	4273	3572	9359	8701	9095	1692	1064	494	837	460	579
Stk40	-1.06252	0.14589	2.0726e-11	1099	1109	1070	1093	1201	1204	1927	1935	1869	1945	2123	2299	1925	1877	1600	2695	2376	2429				Tbc1d2	0.22651	-1.46262	3.64468e-08	2129	2043	1715	1830	2213	1929	606	697	537	863	999	864	2081	1623	894	4631	3755	3241
Lin54	-1.80438	0.245555	2.09945e-11	456	583	648	816	687	572	1309	1299	1312	1416	1460	1602	1909	2053	1200	1849	1667	1723				Serhl	0.214172	-1.30561	3.65338e-08	1169	1069	1024	711	678	659	1895	2117	1847	1114	1254	1449	747	821	1486	2696	2658	1959
Gpr161	5.17992	0.577751	2.15173e-11	263	159	293	127	298	234	14	5	15	6	2	9	6	22	22	1	0	1				Mras	0.346237	-2.45472	3.67459e-08	394	414	413	559	485	388	48	86	84	34	56	46	834	557	114	1248	904	677
Tstd1	-3.5446	0.41619	2.21197e-11	41	66	46	34	68	25	1454	1802	1756	1007	1383	1560	299	737	1365	3314	2448	1615				Wipi1	0.168556	1.04504	4.03298e-08	2085	2139	2488	2224	2284	2376	1362	1540	1582	1019	1102	1255	1296	1092	982	830	745	642
Cenpv	-1.74063	0.233093	2.31651e-11	528	548	477	730	692	596	2750	2706	2837	2011	2084	2611	1203	1448	1612	1429	1182	1127				Slc25a45	0.463477	3.38867	4.09559e-08	388	445	455	394	547	393	437	578	332	1111	909	1117	17	8	6	86	112	144
Mroh2a	-4.2565	0.537777	2.33712e-11	7	8	2	5	3	3	32	37	38	55	59	84	60	80	22	27	20	18				Dnm1	0.538236	4.34449	4.18602e-08	772	773	478	174	95	173	4649	4404	4318	3652	4269	4541	630	1092	2351	41	89	131
Ube2e2	2.12275	0.283429	2.33712e-11	656	624	737	675	759	828	209	248	220	182	163	187	144	124	159	320	475	360				Tnf	0.340873	-2.21945	4.21803e-08	262	223	115	115	189	180	97	90	122	65	68	59	451	415	291	522	431	429
Tyro3	2.73922	0.367327	2.46336e-11	2679	2721	1578	1224	1873	1884	889	951	830	386	362	489	274	378	519	322	300	295				Gja1	0.535688	-5.9776	4.25071e-08	1688	1410	1845	1734	2145	1950	1	1	2	0	8	3	20	5	1	1246	783	322
Pygb	1.83608	0.250497	2.49749e-11	9074	10144	7687	5268	5446	6593	3529	3781	3321	2456	2697	3022	2596	3263	3400	5798	5075	4838				Pde4b	0.346985	-2.28032	4.37124e-08	0	0	0	1	0	0	61	71	81	52	37	58	81	111	154	149	180	260
1700001O22Rik	3.01233	0.391664	2.56387e-11	442	388	526	417	344	541	105	121	65	76	76	99	106	92	180	52	75	108				Gm7357	0.236996	1.49288	4.43174e-08	131	150	104	75	124	99	327	312	333	270	365	388	166	164	195	125	100	112
Ndnf	6.85798	0.611856	2.68554e-11	2946	2374	2351	3325	4897	3497	3	4	0	12	14	5	57	15	14	300	138	46				Chka	0.205673	1.28074	4.53114e-08	5914	6048	4391	4005	3760	4822	3147	3263	3500	3161	3726	3563	2996	2837	2328	1782	1549	1530
Pde4b	-5.51747	0.72229	2.68554e-11	0	0	0	1	0	0	61	71	81	52	37	58	81	111	154	149	180	260				Fam57a	0.244952	-1.53496	4.53114e-08	1450	1588	1815	1370	1408	1236	1130	1183	1286	966	1084	1163	1626	1754	1553	2684	3021	4437
Gfra3	-6.84118	0.819843	2.70176e-11	0	0	0	0	0	0	201	226	299	74	87	87	31	75	89	10	13	11				Lpo	0.918331	-7.78881	4.53114e-08	1	3	4	31	20	20	0	0	0	0	0	0	208	17	38	205	407	488
Notch3	3.78245	0.446748	2.91912e-11	2098	1778	2346	1531	2003	2364	69	86	34	110	123	88	377	192	202	245	138	172				Zbp1	0.503453	-3.52433	4.53114e-08	11	22	7	9	18	28	15	20	49	28	16	16	65	53	86	258	203	348
Ccdc134	-2.04366	0.276176	3.03122e-11	449	468	401	360	407	384	1328	1334	1063	1437	1599	1501	623	968	531	593	560	464				Msn	0.507061	-4.08776	4.65335e-08	4666	3470	4839	5755	9753	8038	11	20	3	41	80	31	2864	1286	227	3615	2459	1757
Defa-ps1	-8.05099	0.842621	3.06054e-11	0	0	0	0	0	0	160	486	885	818	567	709	49	119	516	0	1	1				E230025N22Rik	0.524571	-3.42181	4.7057e-08	90	104	68	38	37	46	19	19	6	4	2	6	22	16	27	78	84	84
Anxa6	2.39606	0.302663	3.08991e-11	3581	3127	3710	5674	6473	5023	237	293	365	255	281	254	2309	1388	563	926	701	545				Inpp5j	0.314552	-1.94252	4.72772e-08	728	689	669	335	303	325	1867	1752	1672	1034	1127	1282	860	796	1563	4042	3318	3060
Pml	1.05925	0.146059	3.10882e-11	3245	3238	3384	3045	3681	3650	1729	1797	1683	1337	1300	1490	2010	1902	1682	2130	1735	1691				Nav1	0.24622	1.59347	4.72772e-08	1741	1734	1655	1248	1852	1888	1077	983	1099	680	700	908	337	462	679	311	211	145
Sgce	8.58135	0.663901	3.10882e-11	763	495	686	164	320	272	4	0	1	0	0	0	0	0	0	0	0	2				Bri3bp	0.192588	1.19665	4.79053e-08	1980	1928	2443	2357	2697	2466	3977	4544	3917	3983	4116	4635	1653	1974	2134	1933	1855	1785
Tpsg1	-5.97144	0.682901	3.1125e-11	0	2	0	0	0	0	631	510	664	230	230	250	68	187	809	101	123	98				Chst15	0.369919	-2.34403	4.81435e-08	904	755	1267	755	854	732	407	507	274	213	189	266	475	254	570	1135	1476	1218
Scel	4.1641	0.469841	3.3428e-11	1065	942	1223	1839	2742	2361	24	19	25	15	54	36	296	226	106	731	419	303				Pfkfb4	0.242702	1.58552	4.84181e-08	410	404	236	262	252	234	3115	3196	2620	2817	2842	3005	185	254	713	541	537	394
Efna5	7.39668	0.722925	3.35172e-11	659	674	558	859	1088	837	0	1	1	0	0	0	38	13	2	122	111	56				Gkn3	0.778084	6.87667	4.86419e-08	36552	44273	37887	71288	75554	76939	1921	2388	3007	179	242	266	18	47	28	4	7	0
Camsap2	2.99372	0.372301	3.49776e-11	1903	2000	1937	1729	2073	1802	61	87	92	142	172	146	684	630	343	1354	842	659				Shf	0.195066	-1.20162	4.9635e-08	764	720	560	665	897	722	231	252	252	183	188	216	590	567	553	723	441	546
Tmem189	1.77676	0.235595	3.58971e-11	1344	1573	1095	1366	1619	1346	256	239	205	213	212	257	209	238	97	1121	1082	955				Hoxa3	0.495018	-3.55581	5.07201e-08	1	0	0	1	0	0	67	67	39	87	81	138	44	122	173	849	738	618
Rab5b	1.52792	0.211607	4.01641e-11	2445	2455	1888	1507	1744	1631	1157	1130	1036	835	899	906	921	778	1095	1503	1388	1308				Crnn	0.756645	-6.48929	5.17007e-08	1	7	0	6	3	0	1	0	0	3	6	1	95	41	62	758	330	227
Golga7b	-6.13843	0.751075	4.04906e-11	0	0	0	0	1	1	48	73	73	31	33	53	55	51	27	6	14	9				Fabp2	0.584453	4.30246	5.49702e-08	4	19	4	16	18	9	4383	5393	5095	11746	11390	12383	406	598	1017	111	419	271
Col11a2	4.36387	0.518115	4.16781e-11	1794	1722	2853	1942	2524	2299	165	192	261	51	56	78	66	64	73	60	76	48				Ttc39c	0.561792	4.22747	5.83267e-08	65	53	82	54	88	83	183	161	179	585	402	546	10	15	22	21	19	10
Ets2	-1.15946	0.161507	4.24337e-11	4088	4298	4029	4460	5911	5184	7950	8388	8769	7091	8119	8091	15731	14639	11392	16056	14063	14049				Gm10639	0.575185	3.83224	5.89605e-08	660	1026	252	521	271	143	1313	1348	1147	3040	3006	2911	631	314	133	297	162	185
Gnpda2	1.55946	0.218571	4.37299e-11	765	713	600	524	671	661	576	567	566	295	382	398	278	380	597	557	468	403				Prune1	0.177394	-1.08722	6.10019e-08	1794	1782	1625	1930	2241	2017	833	884	748	876	874	989	1115	1031	1110	2544	2031	1882
Adgrg6	7.84891	0.680702	4.76009e-11	3338	3151	3708	2231	4936	5194	6	17	8	2	3	1	18	2	11	263	139	11				Nxpe3	0.491788	3.05738	6.15777e-08	239	230	220	212	363	427	11	20	37	31	39	52	83	62	12	8	16	5
Erap1	-1.23206	0.169249	4.96699e-11	1219	1291	1310	1180	1278	1214	4962	4992	5937	3707	3845	4306	3104	4047	4787	3697	3735	4049				Bpnt1	0.309773	1.96683	6.24771e-08	4164	4402	3460	5389	5528	4897	13941	15790	12458	20816	19264	22761	4469	4912	5811	4923	4804	4605
Crybg3	1.58696	0.216339	5.13258e-11	1574	1704	1547	1958	2137	1814	365	476	576	360	445	411	1107	1046	738	1284	1121	1153				Jaml	0.462943	3.14615	6.77354e-08	277	220	573	929	437	476	5709	6311	5907	4277	4256	5185	1844	2195	2985	821	414	334
Mapk12	3.17286	0.398804	5.56477e-11	669	604	349	446	372	453	27	47	43	23	40	32	188	148	85	177	101	143				Hmga2	0.288256	-1.73866	6.7864e-08	953	958	1406	1203	1221	1276	1221	1195	1127	618	661	674	456	707	1118	1928	2246	1831
Tnfaip8	1.75523	0.237619	5.6144e-11	1363	1329	1504	1561	1994	1966	357	414	352	283	284	298	829	835	520	1086	908	809				Nomo1	0.176857	1.08522	6.87272e-08	5913	5673	6617	6297	7923	7209	15911	16147	14894	13485	15163	16306	5949	7494	8625	7601	6507	6521
Wdr72	8.70799	0.675827	5.64204e-11	1509	1414	1652	1151	1814	2021	0	0	0	4	1	0	7	2	1	14	12	32				AC133488.1	0.224772	1.34307	6.95887e-08	20	20	14	16	13	23	538	379	406	371	462	453	613	655	373	255	205	255
Nos2	-6.13869	0.66933	5.87718e-11	0	0	5	0	0	2	138	197	298	348	383	245	649	450	1653	303	229	162				Psmb9	0.278978	-1.64349	6.98371e-08	151	145	74	79	46	88	234	260	234	203	166	183	99	109	393	262	289	298
Ptpn9	1.12593	0.157622	5.92299e-11	2083	2143	1820	1793	2364	2057	1107	1252	1179	827	873	942	1615	1549	1539	2352	2063	2014				Tnfrsf11a	0.25664	-1.59685	6.99691e-08	498	499	513	713	779	756	1349	1291	1336	785	946	1133	1319	1422	1654	3658	3347	3153
Sis	-12.423	0.833753	6.11694e-11	0	0	0	0	0	0	28212	38906	49044	295529	260227	260142	428	2280	44945	6	59	25				Lct	0.93229	8.35336	7.04553e-08	2	6	2	0	2	4	134	230	358	10538	7035	7621	5	6	12	3	1	1
BC030870	-5.27298	0.566786	6.33816e-11	21	11	55	5	12	28	1204	1187	1298	1831	1707	1852	485	530	814	1347	1254	839				Cyp2j9	0.468858	3.43958	7.95012e-08	55	68	16	28	14	13	580	701	705	519	642	668	40	52	152	14	33	29
Fbxo17	3.47805	0.441546	6.33818e-11	302	310	170	240	271	220	32	62	17	20	22	34	28	36	42	18	15	19				Atp4a	0.480523	3.24424	8.02596e-08	161	204	192	89	108	160	115	114	76	44	66	76	23	31	21	10	6	6
Zfp93	1.79596	0.253185	6.36321e-11	298	278	270	235	293	299	250	237	230	126	137	158	110	110	253	245	215	217				Tcim	0.203403	-1.23445	8.38467e-08	1163	1134	867	891	1227	1019	1789	1654	1573	1348	1513	1431	1516	1016	1767	3501	3391	3049
Tle3	1.40426	0.198142	6.36685e-11	4221	4888	4231	3051	4093	4503	3240	3533	3413	2037	2454	2432	3186	3418	5357	4812	4067	4158				Zbtb4	0.200453	-1.18325	8.87816e-08	2652	2465	2061	1556	1897	1953	1113	1086	1080	641	721	818	693	535	1262	1279	1301	1317
Adamdec1	9.09217	0.801768	6.61241e-11	988	997	680	271	467	715	0	1	0	0	0	0	0	8	0	1	3	4				D630045J12Rik	0.353644	2.24535	9.0199e-08	330	233	255	330	570	412	157	161	173	104	119	128	86	94	73	43	31	36
Dennd5b	-2.07502	0.276857	6.66412e-11	166	129	136	129	149	145	1089	980	1033	1004	1060	1111	454	671	1023	396	235	349				Slco3a1	0.770174	6.71521	9.14492e-08	362	205	72	25	138	60	304	281	284	546	358	580	46	207	318	2	0	0
Fabp1	-11.8962	0.850148	6.70238e-11	0	0	0	2	0	0	14326	15846	10505	95187	81495	94768	6	61	97	0	9	2				Aldh1b1	0.290639	1.78866	9.86003e-08	25	20	41	21	53	37	25230	27964	27300	19543	21158	25645	8944	12979	19674	3969	4988	5438
Lclat1	-1.88881	0.255262	6.72574e-11	679	694	641	859	724	649	3523	3568	3329	3858	3728	4191	1736	1965	2869	3000	2803	2662				Rasd1	0.491908	-3.31945	1.00437e-07	10	2	32	9	10	9	39	35	41	31	41	26	45	60	92	295	384	241
Chrm1	3.75887	0.507601	6.86327e-11	113	128	84	71	74	72	51	63	61	11	13	19	3	15	49	3	3	6				Sh3pxd2a	0.32557	-1.9671	1.04114e-07	4302	3836	3576	2774	3950	3808	301	393	476	160	205	212	528	526	570	1007	1279	776
Gm20219	2.09287	0.284759	7.33963e-11	610	662	429	442	540	559	155	147	156	83	113	123	429	394	360	286	205	150				Dnmt3b	0.209395	1.25494	1.05119e-07	237	215	167	196	254	204	288	281	273	205	214	261	284	368	186	164	137	132
Tcf4	1.90796	0.26264	7.45525e-11	2165	2553	2246	1784	2180	2143	816	775	848	427	530	581	780	1044	771	1362	1138	1037				Nr1h3	0.461385	3.26548	1.05672e-07	164	231	83	57	71	94	541	548	516	492	540	661	70	142	196	45	45	13
Defa5	-7.36715	0.82365	7.85987e-11	0	0	0	0	0	0	301	562	874	757	509	662	50	128	1219	0	1	0				Timp2	0.287087	-1.84868	1.05869e-07	5247	4858	5460	4674	7426	6760	95	166	103	88	137	98	1501	835	308	1462	1072	691
Asah1	1.09404	0.15358	7.91317e-11	12450	12764	13436	13598	13232	13991	5573	5958	5657	5793	6045	5506	7970	7240	7051	11033	9495	8663				Adgrl1	0.280479	1.73602	1.14648e-07	851	735	819	784	1092	1315	409	348	506	382	449	450	490	607	508	132	159	145
Fam174a	1.61912	0.227365	7.91317e-11	557	550	458	441	549	527	244	326	290	248	252	230	260	210	389	487	444	522				Tcf7l1	0.640729	-4.25225	1.19552e-07	264	284	105	56	86	100	22	18	18	1	6	6	4	9	8	425	277	66
Mvb12b	4.7783	0.587755	7.91317e-11	655	549	393	183	430	456	46	80	56	11	11	13	19	40	67	2	3	10				Ncf4	0.856022	-5.65421	1.19887e-07	0	1	0	0	2	1	0	0	0	0	0	0	21	18	47	17	12	28
Btnl2	-8.26644	0.749383	7.97056e-11	0	0	0	0	0	4	834	942	971	2130	1935	2199	67	44	344	44	101	205				Rgmb	0.280819	1.7788	1.22518e-07	1063	1110	1115	662	889	831	4645	5376	7854	3081	3087	4084	1817	2615	2996	1061	904	874
Gm2061	-7.56171	0.75708	8.02322e-11	0	0	0	0	2	0	520	667	490	1131	753	884	204	183	1367	84	153	366				Camsap2	0.325834	-2.09509	1.23259e-07	1903	2000	1937	1729	2073	1802	61	87	92	142	172	146	684	630	343	1354	842	659
Apoa4	-12.0056	0.843009	8.374e-11	0	0	1	1	0	0	11586	11953	7425	129819	123181	103130	11	156	363	5	25	3				Mical1	0.463274	3.11287	1.24525e-07	704	754	732	453	538	308	2369	2576	2478	3910	4479	4633	1606	1611	2194	615	349	148
Zfp52	2.41702	0.31078	8.54323e-11	963	898	1104	1209	1167	1167	38	55	41	63	106	70	561	354	144	805	527	421				Phf11d	0.589766	-3.79725	1.28128e-07	23	39	6	5	21	5	41	37	49	14	14	8	58	50	144	164	270	301
Adcy3	4.38281	0.531606	9.32248e-11	530	401	160	138	267	154	30	37	20	27	25	30	6	19	31	1	0	1				5830428M24Rik	0.816428	-7.46559	1.31211e-07	110	131	66	40	57	43	0	0	0	0	0	0	6	1	0	249	203	134
Chn1	4.1598	0.487991	1.01883e-10	255	212	325	165	289	359	12	18	21	12	11	15	10	12	11	9	13	14				Aldob	0.764859	6.76162	1.3448e-07	3	15	14	9	2	1	66551	71402	78740	350473	317155	340136	1508	3620	26682	654	387	231
Defa34	-7.46791	0.826432	1.03679e-10	0	0	0	0	0	0	426	493	839	899	639	775	59	146	1610	0	1	0				Slc25a35	0.256561	-1.51061	1.36084e-07	1276	1445	1324	818	669	852	508	505	492	405	392	452	402	636	703	958	1003	917
Inhbb	6.98599	0.655826	1.11054e-10	495	548	190	25	64	133	3	5	2	1	1	4	0	0	3	0	0	0				Ttc21a	0.531609	-3.97775	1.4083e-07	28	15	14	17	7	11	4	3	8	8	4	9	12	6	7	90	159	115
Kctd14	3.67126	0.488679	1.11246e-10	5719	5696	8505	8198	4466	4822	2344	2887	1121	735	595	996	212	289	791	102	102	96				Lrrc8e	0.348992	-2.10063	1.41766e-07	833	815	605	528	394	393	169	193	123	81	94	82	125	128	141	442	451	400
Il6st	2.04266	0.281951	1.11445e-10	5201	5873	4802	3282	3890	4253	1375	1529	1704	898	964	1198	1794	1748	1495	2406	2138	2181				Cd55b	0.296194	-1.84985	1.4602e-07	446	326	242	264	380	321	258	255	326	166	177	208	516	323	292	1292	1017	867
Pygl	3.62464	0.52151	1.13904e-10	614	560	408	171	74	173	318	345	340	99	105	110	24	22	298	53	50	52				Faim2	0.829497	5.87609	1.48899e-07	264	248	483	925	1329	593	76	60	62	33	40	42	6	17	13	0	0	0
Camk2n1	3.56692	0.495148	1.14063e-10	3194	2883	5034	1079	2054	3575	1343	1486	1512	647	499	632	359	427	1988	869	935	1825				Zfyve21	0.202022	1.23215	1.50625e-07	643	633	532	530	580	607	1224	1419	1054	1268	1346	1398	435	594	894	424	432	404
Gad1os	5.49286	0.606348	1.14522e-10	134	121	137	76	76	92	6	1	13	3	0	1	4	3	9	1	1	4				Rab4a	0.294365	1.86118	1.5247e-07	441	484	263	434	499	352	1350	1380	1180	1143	1253	1213	413	418	908	302	166	270
Blnk	-1.37043	0.19227	1.15765e-10	840	936	811	952	859	864	2773	2912	2862	1954	2035	2027	2660	2635	2350	6217	5659	5595				Gm34084	0.647867	-4.58572	1.54986e-07	5	2	5	0	2	1	8	3	1	0	2	1	1	1	14	25	43	38
Guca2b	-7.76979	0.68624	1.19945e-10	5	6	3	5	6	3	973	1005	1020	7742	6030	5996	227	540	1531	380	397	519				Il7	0.524383	-3.46374	1.56364e-07	12	10	1	15	6	5	14	18	10	9	3	6	10	11	23	86	93	72
Psrc1	2.40721	0.325378	1.22878e-10	4941	3925	3989	2526	3707	4489	876	909	912	499	604	654	2244	1698	1532	1029	1232	1032				Foxn1	0.686983	-7.28824	1.61367e-07	2	0	0	2	2	3	2	0	0	1	2	0	0	1	2	446	217	139
Npc1l1	-8.27162	0.684853	1.27305e-10	6	7	4	5	2	6	4694	4413	4185	18335	18259	17681	176	422	3290	2	21	15				Shmt2	0.224233	1.31939	1.62277e-07	3321	3475	3481	4157	3800	3512	7931	7111	5769	4444	5085	6032	10505	13045	5852	3996	3446	3275
Slc3a1	-6.49061	0.617191	1.27641e-10	10	9	12	5	16	18	2610	2996	2578	7283	6146	6117	225	254	2235	420	261	186				Lpcat1	0.235875	-1.42477	1.68589e-07	531	472	496	501	600	603	362	427	372	229	228	289	499	585	399	939	988	1004
Zg16	-7.95542	0.736939	1.3211e-10	0	2	0	0	1	0	688	1060	1743	2492	2742	1981	167	340	3525	1099	1074	1506				Pdgfrb	0.50209	-3.43598	1.78682e-07	0	0	0	5	3	10	53	35	42	19	29	37	154	112	256	291	357	350
Acpp	-4.78917	0.52118	1.33011e-10	30	23	4	5	7	3	2306	2295	2190	978	990	1184	233	482	1151	18	17	11				Chchd7	0.192293	1.14823	1.7924e-07	385	316	358	320	295	269	741	787	782	824	853	900	376	443	457	375	355	357
Pirt	5.26437	0.56305	1.38793e-10	374	349	130	61	103	237	28	33	25	9	11	14	0	1	6	0	0	0				Omp	0.334594	-2.21213	1.80993e-07	100	76	56	64	79	66	20	21	24	37	33	52	213	135	59	385	272	280
Ccpg1os	2.12753	0.301641	1.43159e-10	406	377	321	297	243	307	206	244	199	106	112	125	114	93	202	234	208	199				Nrap	0.448832	-2.99871	1.82021e-07	10	3	4	2	7	2	67	61	33	63	90	92	37	46	82	560	505	339
Chic1	-4.22178	0.507847	1.43763e-10	18	8	14	3	9	8	257	252	319	330	382	356	649	713	1004	252	350	648				Btbd8	0.269125	-1.60155	1.85941e-07	214	239	194	147	172	156	199	183	217	130	111	134	194	146	211	380	495	337
Hoxb3	-5.93471	0.806609	1.45883e-10	0	0	0	0	0	0	29	22	42	19	42	19	905	880	270	195	369	943				BC029722	0.204595	1.20418	1.88853e-07	669	570	667	644	913	712	496	599	514	640	649	725	557	536	387	455	377	325
Phactr2	2.67101	0.366533	1.48779e-10	1168	1221	1036	669	733	1007	283	328	409	169	199	183	219	179	271	198	281	264				Fbxo32	0.350495	-2.14313	1.99203e-07	1155	1124	846	580	882	1104	168	195	219	110	128	92	977	648	715	694	586	847
Vill	3.70423	0.443912	1.52551e-10	17755	16955	14758	9840	12289	13097	556	717	457	381	474	321	1779	998	397	2702	1838	1022				Fzd8	0.279273	-1.69383	1.99203e-07	198	186	222	210	301	273	47	65	62	55	55	58	56	53	64	191	208	205
Themis3	-5.17166	0.563205	1.55233e-10	38	35	11	36	19	9	1033	1275	997	2405	2345	1993	1211	845	2399	1616	1457	1368				Lmcd1	0.758879	7.04432	1.99203e-07	403	328	518	312	878	636	391	368	338	81	97	154	0	4	0	1	1	0
Slc6a4	-5.75912	0.61691	1.55882e-10	2	0	0	1	3	1	941	1005	972	636	750	883	3	10	138	16	13	21				Appl2	0.229631	-1.35215	2.00626e-07	12145	12159	15674	12184	9314	11630	3811	4056	3770	2857	2761	2848	3605	2768	3680	9504	7893	6971
Tvp23b	1.1613	0.167084	1.57204e-10	2134	1932	2027	1931	1788	1882	1368	1585	1431	1265	1271	1417	971	846	1480	1865	1844	1603				Hs3st3b1	0.426054	-2.71017	2.04941e-07	1324	1574	1210	873	710	853	23	27	32	23	24	35	110	251	74	287	201	313
Fgd3	2.24648	0.295668	1.57918e-10	2204	2076	1730	1990	2961	2416	188	209	137	116	178	153	1464	814	317	788	668	752				Nxf7	0.897561	5.73544	2.06407e-07	0	0	0	2	0	0	26	72	15	45	51	41	94	230	107	0	0	0
Mboat2	3.34826	0.414379	1.58922e-10	2146	2362	2087	1857	1605	1792	115	117	76	152	80	129	111	49	43	1100	653	594				Slc39a14	0.314745	1.95145	2.06407e-07	1537	1646	2024	1982	1597	1276	7873	8820	7688	11436	10906	11921	3027	2886	4653	2168	2502	2082
Itgb6	2.04915	0.27251	1.62512e-10	5808	5179	6858	6258	9287	9639	607	632	782	542	598	612	2801	2254	782	1423	1133	972				2210407C18Rik	0.740495	6.01859	2.09191e-07	10019	11805	3229	2100	934	758	10182	13411	15313	21069	12997	17183	2712	1664	2223	22	71	197
Ampd3	2.13752	0.306733	1.66312e-10	1226	1259	1525	1301	1376	1338	1121	1184	951	652	628	626	594	500	1761	1366	1209	1179				Defa22	0.801957	6.8231	2.1153e-07	0	0	0	0	0	0	293	358	500	1030	814	822	175	382	3391	0	2	0
Ttll7	2.9825	0.380274	1.68745e-10	1871	1805	1976	2246	2796	2179	109	117	162	156	205	137	200	251	139	400	208	133				Tubb2b	0.373865	2.12251	2.1153e-07	296	271	297	317	720	358	228	242	227	518	518	570	837	568	151	295	208	272
Enpp5	2.28017	0.3204	1.70285e-10	2927	2617	2623	1715	1829	2118	1169	1205	1106	568	612	680	681	508	940	1091	1083	947				Defa27	0.909974	6.52945	2.14601e-07	0	0	0	0	0	0	73	85	160	228	169	187	20	42	170	0	0	0
Mrps31	-1.01849	0.145487	1.7199e-10	845	954	760	938	795	833	1978	2134	2152	1870	2033	2148	1356	1528	1624	1064	939	866				Tubal3	0.430968	2.90178	2.15485e-07	37	37	6	9	30	18	906	962	862	1070	1078	1079	175	245	583	65	91	64
Sema3c	2.57133	0.340282	1.81106e-10	7221	7074	5528	5730	6407	5994	430	521	493	693	880	662	6816	3963	3325	9411	7596	5701				Rbp2	0.74537	5.76415	2.1645e-07	2	11	10	0	16	12	5156	7467	5764	30815	29566	30163	335	423	823	155	177	139
P3h4	3.22807	0.434494	1.88249e-10	1271	1085	889	368	702	704	218	250	214	105	110	127	110	100	174	182	147	90				Sesn1	0.217929	1.32772	2.19379e-07	476	422	352	411	332	373	1592	1697	1584	1746	1677	1871	438	627	1181	439	450	433
Anks6	3.36984	0.458977	2.03179e-10	387	438	298	242	244	254	126	146	131	41	40	50	29	26	68	6	15	10				Apoc3	0.965203	8.45367	2.27267e-07	0	0	0	0	0	0	462	496	422	3314	2625	2348	6	14	68	0	0	0
Atp10d	4.00876	0.47705	2.03179e-10	540	493	478	247	336	400	13	19	26	12	20	10	38	36	14	33	27	34				Ace2	0.64576	5.20245	2.28653e-07	8	3	0	4	3	4	3045	3832	4294	13786	12405	12006	237	584	3712	83	65	70
Ptp4a3	2.28946	0.305674	2.16591e-10	4703	4023	3731	3527	5786	5263	321	414	342	388	545	512	2303	1527	903	3184	2356	1487				Gm379	0.696709	-4.89647	2.3063e-07	17	20	15	13	19	11	0	0	0	0	3	0	12	9	12	42	33	19
Adssl1	4.16231	0.513873	2.25537e-10	1331	1165	1067	799	918	1145	89	134	115	23	32	43	75	44	61	130	112	95				Mpst	0.195209	-1.13569	2.3801e-07	1560	1629	1475	1343	1319	1287	1178	1343	956	1166	1243	1311	1152	1037	1770	2303	2244	2017
Slc1a2	8.26263	0.712458	2.36666e-10	311	261	741	631	426	373	0	2	0	1	0	1	1	1	3	1	1	1				Igsf23	0.521393	3.44024	2.38035e-07	1733	1860	1049	3582	2911	2419	3597	3926	3584	8398	8760	8573	5141	3640	4033	317	704	945
Exph5	1.54382	0.225314	2.41403e-10	1180	1256	1136	927	783	831	726	862	1078	607	578	615	891	1100	1753	2346	2220	2140				Map3k15	0.290675	1.80512	2.60006e-07	305	303	383	214	216	317	1197	1135	1066	571	633	720	419	605	682	191	152	194
Fbxo2	6.0977	0.642054	2.43246e-10	428	395	491	113	134	165	12	1	0	8	7	6	3	5	16	2	3	3				Slc6a4	0.430351	3.33669	2.63004e-07	2	0	0	1	3	1	941	1005	972	636	750	883	3	10	138	16	13	21
Tmem161b	-1.20561	0.175025	2.49413e-10	603	625	685	722	701	594	954	1007	1046	1004	1021	1156	979	1168	649	801	622	689				AI481877	0.403923	-2.64436	2.7243e-07	333	296	465	272	274	277	36	43	35	24	23	28	155	47	46	423	318	278
Cyp21a1	8.52503	0.753927	2.56929e-10	822	661	907	331	1085	1003	0	0	0	0	1	1	6	7	1	10	9	6				Tnfrsf11b	0.46232	-3.30061	2.7243e-07	5286	3743	5179	2812	6248	8344	63	97	86	240	272	154	4529	2840	934	6681	3637	3442
Gm2a	2.60106	0.35183	2.56929e-10	6488	5621	4733	2856	3153	4065	763	917	668	597	661	659	1350	1050	878	1166	1045	815				Adcy8	0.630006	4.49229	2.78181e-07	183	111	449	83	277	264	217	201	288	185	129	196	166	281	382	15	2	0
Kcnk5	-3.21941	0.416144	2.64153e-10	172	230	179	101	135	123	1345	1413	1357	2242	2187	2452	737	856	975	1098	917	756				Aqp5	0.732066	5.85462	2.79805e-07	49559	45735	96068	80780	87325	90704	40	87	43	24	28	38	7	6	1	0	1	0
Aldh18a1	-1.97043	0.278239	2.70949e-10	3929	3588	4186	4762	4101	3594	11380	11179	11694	14367	15329	17688	7163	7372	6587	3800	3317	3014				Akap17b	0.4379	2.75265	2.93411e-07	47	54	52	143	92	110	130	152	171	128	130	120	75	74	79	26	23	19
Nlrp1b	-5.02585	0.576854	2.78203e-10	1	5	4	2	0	0	377	414	386	525	392	500	20	30	219	217	284	239				Gm26801	0.417796	-2.37087	2.94834e-07	55	76	52	34	34	27	57	38	42	14	14	19	17	16	56	84	70	65
Ncf2	-5.03226	0.654871	2.81126e-10	0	0	0	1	0	1	37	47	34	29	42	47	143	156	202	356	422	485				Pkhd1	0.428085	-2.9643	2.94834e-07	788	723	664	498	471	504	27	36	42	18	36	31	189	55	28	818	528	429
Dcxr	2.20324	0.306022	2.86632e-10	4358	4495	4963	3019	3441	3679	733	961	627	843	873	940	1302	983	1064	7234	7324	5177				Gm16206	0.579429	-4.05533	2.96635e-07	1	1	0	1	0	1	2	5	3	7	8	5	11	5	27	95	70	53
Cfb	-2.28715	0.311397	2.9605e-10	19	32	33	17	17	13	230	263	258	217	218	244	96	103	211	35	54	40				Amigo3	0.278602	1.64203	3.02461e-07	47	51	42	37	65	54	126	161	171	111	127	115	86	124	71	61	49	47
Kcnn1	3.49092	0.465476	2.98363e-10	157	132	75	77	62	117	15	25	17	9	9	18	18	22	30	38	40	27				Elfn2	0.432	-2.98693	3.03676e-07	2	0	1	0	0	0	19	14	18	13	24	27	7	11	17	114	139	105
Jak3	2.9955	0.417262	3.07227e-10	2200	2285	3184	1448	1474	1967	731	842	855	313	306	388	255	230	451	888	867	735				Gm44250	0.267196	-1.52175	3.08231e-07	1210	1195	936	706	635	738	793	903	880	436	496	614	734	587	1363	1021	1129	1325
Sipa1l2	-1.29419	0.187831	3.07513e-10	674	888	572	830	765	748	1363	1395	1492	1279	1378	1619	1317	1338	938	763	611	560				Atg101	0.196918	-1.16462	3.08517e-07	1099	1063	1047	1073	1340	1198	609	724	740	693	744	759	942	1013	727	2895	2277	1443
Ctgf	5.86291	0.560808	3.22521e-10	20661	16378	26316	60515	78322	86553	33	64	20	66	204	93	12858	6628	986	8639	5316	3449				Slc16a10	0.499327	3.54223	3.23614e-07	124	100	130	14	37	62	1547	1566	1695	1688	1719	2013	170	216	476	61	64	102
Mmp11	3.90884	0.491411	3.22521e-10	430	450	299	153	299	276	20	40	27	8	22	13	53	45	39	46	36	37				Defa21	0.831853	6.88337	3.28112e-07	0	0	0	0	0	0	225	333	471	827	608	685	93	247	2235	0	0	1
Gprc5b	4.38204	0.49336	3.24974e-10	1060	1015	2121	2287	3149	1923	47	51	37	17	41	27	85	75	28	7	12	11				Arhgef37	0.368667	-2.2395	3.31353e-07	87	115	118	92	114	73	81	119	76	139	111	125	95	76	168	487	549	302
Stx11	3.91788	0.460184	3.2801e-10	467	373	517	759	869	705	3	9	14	22	11	18	85	88	30	25	15	11				Scly	0.181507	1.0532	3.37468e-07	700	740	700	807	986	773	1174	1270	1192	844	926	1034	1016	1027	898	647	653	464
Tubal3	-4.05036	0.48323	3.34373e-10	37	37	6	9	30	18	906	962	862	1070	1078	1079	175	245	583	65	91	64				Csta1	0.818609	-6.45236	3.48124e-07	0	1	0	2	0	2	0	0	0	0	0	0	23	19	4	61	90	55
Lmnb2	-1.29517	0.188092	3.59499e-10	1341	1715	1480	1597	1738	1592	3119	3245	3121	3057	2929	3654	2863	3989	2471	4772	4108	3863				Stxbp6	0.201951	-1.15545	3.54324e-07	900	1014	768	928	716	794	751	743	813	456	500	521	669	633	932	1243	1137	932
Nipal1	-2.34553	0.328547	3.64438e-10	645	645	263	584	665	501	2381	2488	2517	1903	1989	1910	3741	3396	2214	2825	2277	2289				Car5b	0.451725	-2.9144	3.68595e-07	540	511	467	316	395	478	4	6	3	8	10	5	76	30	24	145	73	67
Mreg	-4.78952	0.577518	3.70252e-10	1	1	8	9	9	6	191	165	272	253	256	350	135	311	282	1	6	3				Macrod2	0.239596	-1.39955	3.70953e-07	58	59	61	70	74	63	77	85	112	80	68	91	50	65	85	208	175	197
Osbpl5	1.85474	0.260745	3.75252e-10	2295	2267	1909	1561	2528	2259	397	463	506	468	524	404	1310	939	873	1406	1112	896				Spsb1	0.440219	2.80085	3.70953e-07	294	191	360	395	567	549	298	380	310	550	517	535	156	108	162	66	81	69
Lrrc8e	2.88087	0.398465	3.767e-10	833	815	605	528	394	393	169	193	123	81	94	82	125	128	141	442	451	400				Tulp2	0.576951	3.73479	3.76577e-07	39	57	36	48	40	32	69	92	78	32	27	43	25	17	12	7	4	1
Gif	7.23763	0.693661	3.78468e-10	6873	2998	1059	494	653	416	11	28	28	3	1	2	0	0	1	0	0	0				Cftr	0.278006	1.69569	3.82555e-07	8659	7643	10720	6808	10116	8109	11480	11649	12688	6808	7118	8432	6601	7040	8796	1930	2168	3029
Alpk1	2.20382	0.317819	3.88343e-10	934	946	599	418	545	674	292	329	392	177	210	231	646	716	964	858	886	846				Sis	0.899336	8.55057	3.82555e-07	0	0	0	0	0	0	28212	38906	49044	295529	260227	260142	428	2280	44945	6	59	25
Tceal9	1.91233	0.276393	3.96901e-10	2667	2476	2344	2546	2883	2592	1403	1626	1428	796	809	946	1153	1754	2055	879	810	616				Ciita	0.570301	-3.53162	3.85385e-07	7	5	7	2	1	10	16	20	25	16	4	15	4	4	28	50	60	170
Slco5a1	5.12878	0.571834	4.0275e-10	265	177	613	384	596	649	2	2	1	6	3	5	82	54	20	133	100	102				Epb41l1	0.365185	-2.17384	3.98577e-07	2296	2519	1735	1441	1238	1131	720	871	746	423	478	364	1661	1028	1458	3018	2125	2269
Rfx2	2.57424	0.361237	4.05612e-10	419	410	303	234	349	339	125	140	128	43	80	114	60	57	97	54	56	38				Snph	0.346918	2.13203	4.07574e-07	0	0	0	0	0	2	271	231	213	144	153	180	51	57	178	24	29	9
Snx33	2.3497	0.328196	4.10055e-10	1531	1471	1163	967	1020	1049	300	342	344	180	196	181	617	523	449	694	604	575				Ifi30	0.265377	1.58189	4.19058e-07	2921	3249	4073	4107	3358	3130	7518	8340	7873	9285	9285	10444	2716	3768	4549	3161	2790	2268
Tbx3	-7.99888	0.750531	4.51875e-10	0	1	1	0	0	2	1549	1444	1213	832	886	848	894	1035	1533	8	253	453				Ly6c2	0.727153	-5.88861	4.23642e-07	82	78	20	185	237	272	0	3	0	0	0	2	72	28	10	321	253	197
Ppp2r2b	8.20544	0.700117	4.69954e-10	2434	2521	1969	510	890	1346	3	4	4	0	0	0	21	8	2	0	0	0				Trim62	0.303399	-1.75034	4.23642e-07	118	131	90	51	115	100	68	70	85	68	62	63	54	66	101	133	196	177
Cd63-ps	1.02122	0.150416	4.73615e-10	3456	3558	2789	2987	3747	3509	2096	2298	2502	1964	1965	2067	1732	2063	2295	3386	3323	3149				Gfod1	0.368834	2.22641	4.38586e-07	129	156	145	226	239	204	94	129	150	169	180	202	63	75	60	52	51	32
Mid2	1.0977	0.160574	4.78877e-10	1360	1355	1369	1336	1503	1387	673	704	761	565	658	617	1126	954	1053	1487	1145	990				Clmn	0.297662	-1.72845	4.39554e-07	7110	6965	9826	5164	5202	5952	2936	2881	2672	2913	3126	3205	2963	2019	4263	9826	8413	6870
Hpd	-6.44793	0.730707	5.30866e-10	2	0	0	0	0	0	757	762	879	206	185	280	122	154	814	67	114	77				Efna5	0.68421	-5.02949	4.40923e-07	659	674	558	859	1088	837	0	1	1	0	0	0	38	13	2	122	111	56
Mmp20	-5.78042	0.725752	5.3201e-10	0	0	0	1	0	1	80	111	101	100	98	116	74	49	182	14	28	31				Hsd3b2	0.505487	-3.91121	4.54753e-07	0	0	0	0	0	0	15	25	12	9	20	8	22	24	11	215	243	402
Cebpd	3.17497	0.443906	5.32229e-10	911	894	506	261	619	690	167	229	259	94	97	99	99	108	202	268	236	245				Zfp185	0.306234	-1.92833	4.54753e-07	452	399	473	419	422	433	39	45	31	45	94	50	872	849	214	556	522	390
Acvrl1	4.52107	0.569701	5.35227e-10	346	300	170	169	251	321	24	45	48	6	9	8	19	18	49	11	9	4				Gm15292	0.919663	6.47882	4.55833e-07	0	0	0	0	0	0	37	105	108	189	156	187	19	40	122	0	0	0
Slc25a35	2.03792	0.297066	5.4e-10	1276	1445	1324	818	669	852	508	505	492	405	392	452	402	636	703	958	1003	917				Arhgap44	0.504577	3.22808	4.61805e-07	3666	3493	3123	2431	2713	2715	39	54	29	84	109	85	59	93	78	9	8	6
Elk3	2.76571	0.360717	5.491e-10	1628	1623	1819	1883	2968	2777	61	88	72	115	173	94	1606	1022	471	1503	1193	1287				2310034G01Rik	0.256902	-1.57464	4.69989e-07	29	32	29	32	42	30	59	64	42	38	48	45	136	100	58	239	227	239
Ppm1k	2.12623	0.310116	6.20224e-10	536	458	542	349	407	574	284	261	268	156	144	203	152	198	321	282	177	170				Sh3bgrl2	0.207816	-1.2265	4.93899e-07	10026	9944	10407	14184	14001	13283	3392	3677	3423	4291	4953	4859	15407	12282	7806	17593	16044	16513
Fam83b	-2.32207	0.325062	6.30141e-10	525	620	672	655	644	584	2551	2894	2489	3771	3915	3839	1948	1866	2325	1791	1357	1327				Defa2	0.817871	6.84185	5.01566e-07	0	0	0	0	0	0	731	1092	1102	2547	1883	2238	722	1758	15107	0	5	0
Cds1	-3.79626	0.464253	6.33549e-10	324	273	145	187	301	87	5436	5889	5104	7204	7699	7663	1791	2332	5171	3790	3870	3830				Kcne3	0.237623	1.4336	5.15428e-07	11314	10057	8611	6344	9020	9305	2108	2274	2504	1846	1841	2110	1147	2235	2259	544	525	709
Insl6	-3.61395	0.462277	6.36199e-10	20	19	18	10	23	11	261	306	212	384	414	409	207	163	355	218	274	189				Prom1	0.23998	-1.37766	5.23697e-07	68450	68146	84967	53381	48227	61707	16098	17314	17360	12393	13632	13586	22455	15888	18704	41426	37622	41121
Wls	1.77911	0.257003	6.86264e-10	7588	7053	8812	7153	8519	8788	2855	2927	3043	1730	1975	1946	6747	5617	5656	9484	7689	7517				Cyb5a	0.322221	1.95976	5.30156e-07	5696	5865	3727	5408	5160	4923	8943	9359	7188	12777	13384	12573	3017	3669	5285	2542	2545	2322
Aga	1.42657	0.209641	7.03114e-10	1722	1423	1501	1148	1664	1593	780	844	813	559	657	631	788	704	854	778	880	757				Orai3	0.178729	-1.00013	5.30803e-07	554	602	590	476	488	488	350	343	274	244	263	293	253	217	435	421	480	361
Tfcp2l1	2.68757	0.379001	7.1859e-10	3155	4163	2123	2301	2199	2036	585	735	862	292	473	437	755	698	763	6068	5718	5516				Rnf144b	0.613219	4.48404	5.34326e-07	1325	1320	851	499	520	598	219	156	265	48	86	78	16	10	16	4	3	3
Rcan3	1.23542	0.182032	7.22866e-10	1344	1375	1239	1351	1455	1374	640	648	641	546	640	618	1345	981	1321	1755	1395	1499				Evl	0.670332	4.89825	5.36397e-07	798	941	742	684	1374	1299	183	251	111	55	62	57	19	83	79	2	1	2
Bach2	3.91431	0.522635	7.27721e-10	209	208	272	185	152	208	45	48	71	7	20	20	19	17	57	11	6	10				Cyp2b10	0.587275	4.27513	5.38173e-07	234	372	111	99	65	80	4122	4538	3305	10565	11131	11191	143	195	375	321	248	143
Tor3a	1.21223	0.178759	7.2942e-10	880	881	754	805	910	840	439	443	424	334	404	347	667	514	639	851	662	658				Arhgef10l	0.200056	-1.13638	5.46401e-07	1812	2049	1685	1453	1860	1831	1495	1434	1356	829	838	1051	1179	1106	1233	2615	2158	2295
Fam83c	5.8124	0.633386	7.49011e-10	257	375	175	321	75	216	3	3	4	4	0	4	13	13	11	7	2	1				Pof1b	0.219573	-1.23573	5.48673e-07	2803	3044	2047	1655	1859	1872	1717	1720	1714	1640	1876	1632	1165	1296	2165	3474	3016	2467
Pak6	2.01987	0.279536	8.03209e-10	2029	2086	1971	1577	2071	2080	239	254	236	186	192	268	718	762	245	508	409	276				Tgif2	0.430715	2.7731	5.48673e-07	198	187	324	187	207	187	1211	1326	913	402	364	514	227	234	253	104	73	84
Papln	-5.62296	0.593227	8.03209e-10	22	11	19	0	7	2	2387	2141	1024	1379	1489	2046	115	303	437	10	19	14				Cttnbp2	0.738349	5.51423	5.53441e-07	16	7	8	47	9	11	745	666	734	117	85	184	29	58	51	5	5	1
Cyp2c52-ps	-4.71814	0.642318	8.119e-10	4	1	0	1	2	3	17	9	13	25	43	35	70	76	15	18	15	16				Cndp1	0.723413	5.35312	5.72707e-07	0	0	0	0	0	0	179	160	163	225	216	217	3	8	43	1	3	0
Zfp251	1.275	0.189387	8.29599e-10	755	646	578	563	546	668	331	409	422	267	312	344	394	434	474	604	566	631				Tnfaip8l1	0.19281	-1.10029	6.12443e-07	678	685	773	850	963	876	827	848	722	593	581	638	928	1038	987	1705	1565	1507
Slc25a30	1.22809	0.178521	8.35862e-10	1342	1233	1455	1264	1210	1316	322	331	309	286	349	357	784	711	377	779	564	514				Gm37844	0.488757	-2.62336	6.1322e-07	89	80	66	46	71	81	191	221	221	81	43	69	18	6	136	128	313	367
Slc6a14	5.33261	0.640239	8.36284e-10	71	94	152	201	292	271	1	0	1	7	2	0	200	212	200	2960	3170	2814				Plekhd1	0.327259	2.00662	6.1322e-07	552	669	549	549	508	404	745	804	462	419	492	583	143	216	228	161	141	59
Ano6	-1.48192	0.218457	8.56841e-10	3620	3344	4037	3457	4885	4018	8064	8596	8104	8747	10408	9979	4259	4215	3687	4083	3145	3465				Zfp13	0.392364	2.4715	6.1322e-07	299	296	244	239	225	181	355	404	367	124	142	185	189	211	234	41	29	33
Herc3	-1.47256	0.215158	8.85414e-10	694	690	596	449	502	544	1861	1802	1603	1587	1798	2015	1875	1590	1745	1645	1472	1275				Psd4	0.209195	-1.20804	6.17717e-07	1608	1868	1166	1326	1245	1147	1454	1416	1336	1431	1612	1587	2040	1740	1508	4568	4056	3743
Iyd	4.38496	0.545993	8.88289e-10	1632	1911	926	758	427	983	281	358	445	133	69	91	1	3	13	51	41	23				Ltb4r2	0.586691	3.86194	6.23686e-07	32	39	19	27	41	35	44	56	39	180	158	201	16	13	6	12	15	7
Rapgef3	2.44139	0.354056	9.0481e-10	578	472	402	252	268	295	143	175	180	105	108	162	222	173	402	100	90	56				Uap1l1	0.196876	1.11733	6.24106e-07	2055	2121	1517	1782	1737	1453	1322	1558	1300	1440	1605	1672	2155	1803	1467	1119	852	729
Syngr1	1.7074	0.250687	9.25517e-10	4620	4909	4054	3196	3148	3311	1669	1816	1582	1613	1778	1876	505	741	798	449	347	452				Vangl2	0.331898	2.02451	6.26142e-07	597	516	568	342	613	533	437	444	357	225	216	241	220	356	278	63	83	54
Cxxc5	3.4082	0.487777	9.39519e-10	755	709	570	272	744	585	227	291	391	115	82	101	43	82	221	18	11	13				Cdk19	0.18576	-1.04939	6.29372e-07	3755	4007	4351	3498	3010	3067	1452	1560	1511	1061	1247	1148	2084	1849	1929	3155	2593	2596
Gm7849	-7.83785	0.850721	9.53069e-10	0	0	0	0	0	0	200	295	525	762	594	672	52	181	775	0	0	0				Tead4	0.331314	-2.07851	6.34566e-07	994	1063	1216	1193	1186	1181	91	121	93	177	285	179	1510	1268	536	1903	1230	1408
Eml5	3.28053	0.431991	9.61327e-10	375	390	266	196	288	255	29	27	43	16	23	21	54	56	30	12	20	11				Gm14085	0.804099	5.9923	6.74782e-07	5	4	1	0	0	1	159	177	208	91	147	69	17	16	56	0	0	1
Mycn	3.47042	0.442617	9.84992e-10	2211	2180	1481	693	1845	1953	100	120	100	74	126	156	77	68	46	138	99	79				Fzd2	0.409693	2.6203	6.81253e-07	401	389	418	306	573	538	298	356	271	142	180	214	122	170	257	11	24	43
Trim3	1.74086	0.25251	1.0033e-09	1484	1324	1428	891	1146	1280	369	367	443	311	294	348	593	492	413	533	451	449				Gip	0.714535	6.55061	7.02667e-07	0	1	0	3	0	0	3343	3235	5062	1030	466	598	2	25	188	0	5	3
Padi1	5.78169	0.639281	1.00438e-09	89	106	78	9	15	51	6	6	4	1	0	2	1	1	11	1	2	0				Psd3	0.286998	-1.65144	7.02667e-07	1020	974	930	678	1032	830	1139	1230	1547	653	684	716	1442	1788	1537	3045	2685	2787
Amotl1	2.00699	0.278627	1.00455e-09	3041	2709	2528	2633	3922	2759	266	340	211	206	393	269	2857	2060	826	1043	712	959				Pla2g12b	0.622425	4.6093	7.2478e-07	515	408	146	91	228	138	493	583	538	982	1125	1317	173	146	435	6	10	39
Col4a5	6.09733	0.608716	1.08635e-09	4829	4217	5312	2983	3740	4398	15	8	9	25	35	44	139	44	47	98	44	8				R3hdm4	0.215615	-1.22096	7.26126e-07	7874	8671	5848	5743	5437	5191	3589	3631	2825	2468	3024	2881	4871	3986	4274	7735	7036	6866
Socs5	1.45965	0.21371	1.14092e-09	1128	1227	1026	1314	1485	1544	349	354	402	337	350	385	989	786	718	984	697	738				Sh2d3c	0.260467	-1.47032	7.44859e-07	387	334	257	207	314	302	89	90	72	81	86	60	109	87	136	215	182	193
Plcg2	2.58681	0.386669	1.19769e-09	1708	1529	2079	1059	1722	1469	1272	1365	1127	475	476	557	356	508	1215	139	203	168				Pcnx	0.19322	1.11941	7.46287e-07	1856	1658	1844	1523	1756	1774	4643	4877	5454	2872	2934	3498	1389	1520	2400	1498	1139	1313
Lman2l	1.63318	0.240598	1.23533e-09	1457	1432	1331	1066	1405	1644	595	585	603	373	426	456	721	559	651	830	653	722				Fam149a	0.494758	3.28805	7.53187e-07	3694	3658	4624	3881	4065	4037	1940	2238	2140	490	598	648	535	398	343	119	95	162
Xylb	-1.81551	0.263121	1.29746e-09	403	372	272	302	405	309	1917	1838	1789	1106	1140	1397	661	926	732	665	662	636				Zfp607b	0.266823	-1.43457	7.61337e-07	156	141	143	88	71	106	110	92	91	59	69	67	23	33	96	107	90	93
Sult1c2	4.02474	0.601133	1.31234e-09	10875	15264	4279	1385	842	2092	2250	2809	2534	770	704	877	139	245	1354	209	380	250				Ampd3	0.265431	-1.45178	7.70399e-07	1226	1259	1525	1301	1376	1338	1121	1184	951	652	628	626	594	500	1761	1366	1209	1179
Ripor1	1.32039	0.195999	1.31656e-09	1464	1309	1427	1041	1411	1276	580	607	557	392	453	470	696	639	539	1039	845	762				Dao	0.847397	7.37291	7.70834e-07	18	9	9	0	8	6	318	316	231	989	910	933	6	7	98	0	1	0
Strn	-1.11361	0.168045	1.31755e-09	1279	1426	1474	1665	1710	1416	2001	2027	2089	2066	2452	2443	3337	2955	2165	3915	2918	2858				Atp2b4	0.652256	4.34847	7.79366e-07	95	64	202	19	49	62	134	172	210	141	112	80	87	31	30	6	9	3
Bdh1	-2.00355	0.292635	1.33104e-09	1824	2331	2305	2861	2893	2746	8159	7790	6240	8296	8333	10290	3692	5009	3545	7158	7122	5568				Snhg18	0.367071	-1.14553	7.8986e-07	575	537	484	208	225	223	543	568	526	155	143	191	1	0	12	60	120	124
Vsig1	4.79037	0.518278	1.34702e-09	13223	14130	11046	12823	10585	11777	84	120	110	152	212	110	85	177	23	889	689	197				Cabp1	0.425121	2.44723	8.70202e-07	1	0	0	6	0	2	60	57	60	49	51	65	89	113	101	5	9	15
Camk1d	-2.32699	0.329618	1.48329e-09	866	752	772	701	894	969	5571	5597	5497	4255	4884	5527	4624	6472	6587	3051	2212	1062				Cavin3	0.339069	-2.21204	8.82395e-07	274	299	243	526	534	381	23	30	23	48	71	35	731	298	88	998	578	530
Slc19a1	-1.39306	0.207398	1.49946e-09	1154	1012	1297	1276	1122	1180	3407	3805	3324	3065	2527	3240	1768	2305	1807	1269	1062	1018				Sqor	0.194284	-1.10346	8.82779e-07	5726	6607	4864	6955	5774	5466	5865	6251	4945	5900	6741	6676	10011	8649	8485	17250	14609	15534
Tnip3	4.45191	0.520772	1.49946e-09	2177	1413	1968	1904	3747	3630	19	33	12	39	80	36	532	266	186	4341	3039	2240				G6pc	0.990125	8.76357	8.95534e-07	0	0	0	0	1	0	330	503	399	3045	2803	2888	0	2	4	0	0	0
Klc3	3.12185	0.426426	1.50036e-09	1088	1017	764	547	996	908	113	183	138	74	99	51	347	249	286	189	131	113				Mogat2	0.567287	4.04486	9.15921e-07	654	777	482	344	256	360	1562	2052	1581	6099	5741	6237	180	299	622	167	135	155
H2-Ab1	4.23181	0.599848	1.56232e-09	169	148	108	75	66	75	20	29	13	33	26	45	12	6	322	24	28	72				9330162012Rik	0.290189	1.69316	9.45102e-07	132	145	115	104	80	94	411	446	480	288	281	328	154	289	191	114	96	93
Fbp2	-2.28067	0.326694	1.65354e-09	1433	1649	1071	1905	1376	1088	5679	6386	5660	7360	7613	8782	4077	4325	4370	7349	6212	5905				Lrrc39	0.670862	4.54961	9.48835e-07	15	19	9	15	18	13	44	57	42	86	63	112	10	3	14	3	3	0
Adam8	3.39161	0.419826	1.68105e-09	6187	5041	3362	3527	5250	5050	59	89	78	113	191	162	913	501	145	225	124	121				Zbtb10	0.478427	-3.00986	9.59773e-07	251	255	219	188	241	213	42	82	106	25	30	19	317	169	152	583	526	471
Sirpa	4.88491	0.613141	1.71003e-09	344	206	161	50	197	199	22	37	5	11	6	7	5	15	35	0	1	1				Dach1	0.514731	3.38035	1.00006e-06	0	0	4	2	0	0	1361	1262	1582	460	442	614	526	828	1035	27	36	68
Hid1	2.16838	0.306037	1.72244e-09	10978	11485	13993	10943	11549	13488	1224	1375	1273	1766	2131	2039	3877	2851	2238	2469	1756	1654				Adcyap1	0.761714	-6.29123	1.10356e-06	0	1	6	1	0	9	0	0	1	0	2	3	90	33	15	345	294	217
Nr2e3	-6.49758	0.812777	1.76598e-09	0	0	0	0	0	0	201	217	99	72	101	126	6	24	48	0	1	1				Muc1	0.652295	-3.3172	1.10855e-06	39716	48594	41056	23615	28748	32936	26	39	44	3	2	2	3	10	7	174	459	171
Usp46	1.03988	0.15557	1.77674e-09	3170	3309	3237	3895	4351	3823	1235	1262	1310	1051	1190	1223	2403	2543	1600	2827	2137	1912				Sfxn5	0.216094	-1.20756	1.10855e-06	323	368	309	318	399	334	236	247	176	156	176	252	120	190	168	533	481	398
Rora	3.47341	0.490516	1.82816e-09	264	204	261	148	86	129	49	61	65	29	26	19	21	20	50	36	31	55				Slco5a1	0.529412	-3.52958	1.12199e-06	265	177	613	384	596	649	2	2	1	6	3	5	82	54	20	133	100	102
Nars	-1.14988	0.175233	1.84101e-09	9343	9591	9678	11081	11011	9243	13247	12878	12901	13782	16308	16662	22391	22690	13783	12130	11640	11169				Malrd1	0.354576	2.21074	1.17339e-06	0	1	0	0	0	0	2495	2902	3329	2045	1794	1992	390	691	3184	104	106	246
Snap47	1.37228	0.206305	1.86191e-09	1626	1564	1446	1261	1746	1689	747	766	727	708	687	740	782	584	880	1074	953	862				Dync2h1	0.210638	-1.16103	1.18967e-06	676	673	597	448	560	544	369	447	482	313	278	343	342	241	396	800	668	627
Ptpn13	7.78917	0.609337	1.8642e-09	8851	7958	8853	5471	8742	9812	8	17	15	3	11	6	6	10	1	1148	207	129				Fndc1	0.705862	-5.14619	1.27501e-06	1	1	5	0	2	3	10	8	2	1	0	1	1	2	4	75	101	233
Fam174b	2.98646	0.431248	1.87437e-09	4337	4745	4372	5307	5627	4848	1814	1948	2015	659	833	870	522	756	1426	727	604	310				Thsd7a	0.552959	-3.26327	1.27687e-06	16	8	25	4	3	11	54	63	37	48	34	42	43	80	184	112	188	504
Ptprn	4.35561	0.569255	1.89175e-09	708	605	657	784	2017	1713	91	143	169	102	71	88	5	12	51	14	13	17				Slc7a1	0.200084	1.09928	1.27973e-06	4046	4074	3721	5139	5025	4563	6156	5382	6119	3739	4259	5057	7930	7860	4599	3726	3143	3285
Kcnf1	-3.14905	0.435021	1.89893e-09	20	44	33	62	30	35	318	415	342	265	253	332	153	226	135	218	208	95				Mt1	0.3216	1.84247	1.3315e-06	784	939	860	1048	1396	1191	1782	1589	1536	1940	1882	2159	665	1307	913	785	627	412
Scmh1	1.21311	0.181052	1.96553e-09	3214	3209	3050	2953	3538	3131	1109	1086	1214	734	913	984	2029	2138	1228	1939	1571	1399				Slc22a13b-ps	0.631003	4.28381	1.35054e-06	18	15	20	14	14	15	86	72	57	315	310	394	10	9	9	17	6	10
Abcc4	1.12433	0.167559	1.98421e-09	4364	4112	3980	4366	4130	4591	895	1081	1136	960	1359	1129	3993	3278	1878	5489	4372	4376				Rgsl1	0.825775	-6.47883	1.3558e-06	1	1	2	4	2	1	0	0	0	2	0	0	1	0	3	25	89	112
C530008M17Rik	-6.0645	0.633678	2.07414e-09	6	14	6	1	0	3	500	588	761	1396	1241	1319	163	206	574	1092	790	429				Shisa5	0.205419	-1.12293	1.36152e-06	8878	8914	7557	5371	6551	7132	3814	3762	3130	2493	2628	2830	3787	2880	4321	5793	5409	5849
Ugt2b36	-6.95419	0.756143	2.1324e-09	0	1	0	0	0	2	248	238	250	362	451	450	15	27	78	7	5	23				Pxdc1	0.396312	2.18996	1.37061e-06	298	238	194	258	432	311	448	521	368	932	867	859	500	159	115	377	282	311
Hspa2	2.96864	0.405986	2.211e-09	1084	1054	780	545	801	786	68	101	74	106	88	117	157	86	114	238	129	115				Gm38158	0.328249	-1.80934	1.38587e-06	65	89	102	93	104	91	105	94	82	46	60	44	39	65	102	162	185	160
Hspg2	3.2883	0.492055	2.25896e-09	8624	7058	11549	5032	8768	6478	4281	4346	4329	1067	1228	1674	352	983	2172	666	402	510				Unc13d	0.260724	-1.49947	1.38587e-06	1810	1705	1180	1574	1957	1510	449	587	380	404	571	351	2636	1600	1288	2267	1780	1896
Arhgef2	1.8841	0.276298	2.323e-09	4109	4271	4460	3407	4490	4082	827	1010	777	1141	1152	1062	1067	1002	1003	2487	1756	1522				Scel	0.421077	-2.68042	1.43563e-06	1065	942	1223	1839	2742	2361	24	19	25	15	54	36	296	226	106	731	419	303
Kcnma1	-5.82696	0.742776	2.38474e-09	0	0	2	0	0	0	69	87	72	83	118	137	70	117	208	21	48	25				Slc12a8	0.535272	3.72216	1.44917e-06	478	606	857	2293	2225	1222	4905	5198	4330	3432	3443	3925	1055	1532	4973	169	229	141
Armcx2	7.70551	0.745989	2.48412e-09	252	153	90	68	47	112	0	1	1	0	0	0	0	0	0	0	2	0				Samd12	0.536684	-3.7385	1.45428e-06	2016	1588	1934	2089	2235	2665	26	57	35	170	212	171	2359	1736	975	3974	3196	3181
Trpt1	1.67447	0.255671	2.59182e-09	226	208	180	129	129	167	103	117	102	90	94	107	93	94	168	180	139	144				Tmem86b	0.33519	1.93299	1.46809e-06	81	81	71	62	85	60	271	225	204	326	350	340	83	148	119	85	70	82
Hpn	5.07224	0.609461	2.6323e-09	2831	2942	2525	673	1517	1732	130	155	44	24	33	47	12	47	20	3	7	4				Ly6i	0.538472	-3.71519	1.53229e-06	86	88	75	216	276	219	0	2	4	2	7	6	109	50	22	160	140	146
Pgc	5.56636	0.634048	2.68169e-09	4000	5049	9574	5200	6173	3264	147	245	265	53	30	50	4	36	19	2	1	0				Hivep3	0.622927	-3.615	1.54218e-06	359	378	153	53	63	82	20	15	13	8	4	5	21	7	27	78	133	134
Arhgef25	5.42361	0.61622	2.70955e-09	526	341	198	112	217	258	1	9	4	2	3	4	36	20	13	7	7	10				Fth1	0.308152	1.77896	1.54425e-06	15983	17083	14048	15350	13515	12980	49225	54887	53817	83211	77879	85316	13544	12235	19065	19592	17987	17610
Fgf15	-4.2689	0.572473	2.72436e-09	1	1	2	2	1	1	87	104	160	120	112	106	1119	1805	5140	21	38	52				2010007H06Rik	0.494272	3.46001	1.56234e-06	1518	1518	2038	1304	645	1109	884	818	775	246	199	307	98	116	253	31	27	12
Htr4	-5.44381	0.68745	2.73089e-09	0	0	1	0	3	0	57	38	46	90	71	119	299	425	535	210	156	146				Gm15544	0.250778	1.36692	1.57506e-06	239	236	285	299	317	266	617	523	412	339	389	447	787	973	435	286	229	274
Taf5	-1.19045	0.182514	2.73089e-09	298	320	346	337	338	306	517	565	485	525	541	606	508	639	366	429	361	360				Ccdc3	0.592125	3.65627	1.68405e-06	281	218	347	140	382	361	28	30	66	47	65	90	30	66	41	10	2	2
Tlr4	2.76886	0.384188	2.73316e-09	1413	1611	898	1234	1019	917	57	150	95	124	130	113	1216	1008	623	1960	1572	1695				Foxl2os	0.836661	-6.5861	1.68713e-06	0	0	0	0	1	0	0	0	0	0	0	0	48	32	6	186	74	36
Kcnab3	3.09083	0.440306	2.74892e-09	289	233	155	113	107	143	41	29	54	29	22	31	52	48	70	25	21	29				Panct2	0.508096	-3.95513	1.70936e-06	63	117	120	114	94	108	1	3	5	3	1	7	19	14	2	172	164	92
Pald1	3.39366	0.463966	2.81225e-09	407	430	497	336	467	490	84	73	79	28	32	30	33	48	37	16	28	30				Bco1	0.680623	4.50271	1.72284e-06	13	11	10	14	25	14	363	435	319	4022	1840	3108	73	96	102	91	49	44
Bace2	3.50144	0.488926	2.96643e-09	6392	7941	3946	4122	3725	3557	897	1137	1349	353	443	353	1143	950	1441	553	504	734				Rusc2	0.397885	-2.46315	1.74694e-06	1118	890	1119	855	1194	1168	61	52	31	71	79	61	533	139	147	908	710	483
Gm20554	7.08958	0.781655	2.97969e-09	101	116	326	19	19	112	1	1	1	1	0	0	1	5	16	0	1	0				Kctd7	0.207709	-1.14871	1.81273e-06	219	229	201	214	227	215	93	110	79	107	124	117	150	153	142	262	286	263
Proser2	1.13182	0.171465	3.14238e-09	2349	2701	2529	2669	2981	2685	972	989	845	758	985	939	1912	1365	1244	1535	1186	1102				Fzd7	0.323298	1.90045	1.85588e-06	1498	1292	1706	943	1064	1487	2348	2755	2577	1456	1556	1657	1536	1982	2137	627	474	246
Nlrp10	5.12768	0.611879	3.21091e-09	1527	1072	1328	244	196	494	31	39	27	26	24	32	13	7	27	503	268	110				B4galnt1	0.299727	1.75991	1.88112e-06	5938	6201	3867	2572	3309	3685	10917	10538	9214	9115	10321	11968	3980	4515	6887	1599	2261	2505
Syt14	-5.66257	0.832378	3.23733e-09	0	0	0	0	0	0	9	18	34	14	34	8	583	369	151	56	50	135				Gpr55	0.623408	3.97474	1.88112e-06	20	18	9	9	3	8	79	90	128	52	57	51	27	17	27	7	1	1
Fzd3	4.62806	0.559921	3.28779e-09	576	546	665	716	995	916	20	44	43	19	21	9	23	29	23	5	22	31				Itgav	0.242894	-1.39417	1.88112e-06	5071	4687	6171	6422	8790	6460	779	889	854	1173	1344	1239	3980	2583	1548	6597	5284	5062
Reg3g	4.31438	0.596646	3.46177e-09	14955	13731	8911	3962	1630	2646	1297	1923	1990	2067	1887	2070	386	407	6090	0	11	3				Mettl7b	0.664541	-3.57642	1.88528e-06	172	295	64	14	11	20	515	483	487	175	176	177	140	170	485	1682	2238	3281
Thbs1	5.30654	0.576981	3.48748e-09	27959	24592	37513	7888	35509	34654	128	178	600	192	278	211	6996	3484	1354	181	272	224				Slc36a4	0.283763	-1.57212	1.92303e-06	513	510	434	388	425	460	71	81	77	82	70	67	484	352	396	191	204	326
Kif1a	3.6486	0.498731	3.70316e-09	595	402	396	154	416	303	57	60	88	23	34	44	46	31	65	17	15	29				Gm48640	0.377967	-2.20276	1.93648e-06	64	108	30	79	94	94	44	60	42	26	39	42	93	83	90	225	217	196
Col27a1	5.98812	0.653118	3.73663e-09	7877	6329	5762	1450	2064	1733	65	100	173	12	19	22	20	22	14	5	3	5				Gm9892	0.248564	-1.4052	1.95157e-06	1803	1853	1859	2608	2411	2233	2460	2625	2388	3267	3323	3331	7047	6152	6140	10467	9895	9512
Fkbp11	1.98928	0.294319	3.87069e-09	1236	1132	1086	1735	1381	1217	297	322	349	294	346	412	406	396	478	229	178	136				Xylt1	0.76396	6.22624	1.99027e-06	118	156	48	77	126	121	374	346	421	74	85	125	2	13	13	0	0	2
Prss32	-4.32017	0.540779	3.87069e-09	66	114	119	302	285	271	4219	3825	2780	5371	5585	5881	4984	5795	8230	14210	12732	11531				Pon3	0.242697	-1.29924	2.04218e-06	1206	1084	867	730	771	775	869	973	914	514	569	652	926	709	1466	1067	1159	1417
Dnaja4	4.0875	0.539715	3.87804e-09	403	385	223	204	278	341	41	35	35	11	10	7	47	47	49	23	31	11				Angptl4	0.543677	3.46402	2.06148e-06	1145	1007	335	951	1953	1608	227	316	199	465	602	577	263	156	281	51	42	29
Pdzd3	-5.77548	0.653776	3.98322e-09	5	1	1	0	1	0	414	453	292	604	539	598	20	38	255	177	188	140				Abtb2	0.541464	-3.89907	2.10892e-06	92	88	129	228	475	276	50	48	62	27	30	17	146	57	33	1923	1472	957
Otop2	8.25339	0.766856	4.13672e-09	226	229	224	42	89	214	0	0	0	0	1	0	0	0	1	0	0	0				Ethe1	0.408615	-2.42267	2.20153e-06	1648	2374	959	1373	1098	900	618	687	510	938	1179	1078	981	918	943	6102	5329	4716
Wars	1.52075	0.228805	4.27496e-09	13350	14863	11510	17152	19268	19641	4272	4638	4282	3786	4505	4679	8638	7990	6853	7071	5789	5429				Abcg5	0.816947	7.05645	2.20476e-06	25	32	3	5	0	0	4188	4330	4240	8162	7995	8793	147	527	2409	2	11	9
Cd24a	2.72068	0.406466	4.28814e-09	37576	38106	46401	33320	34691	38288	15213	17588	20862	8344	8114	9679	6133	8405	16658	8370	5207	2807				Asns	0.244061	1.32458	2.22473e-06	10925	10005	10927	18881	16124	11216	6759	6322	6614	4880	5374	6131	11126	10305	6038	4237	3626	3412
Ece1	1.4372	0.222246	4.54202e-09	5830	5615	4991	3074	5353	5467	3132	3185	3046	2365	2574	2845	2121	2342	3081	3767	3625	3892				Krt13	0.543786	-3.80987	2.2249e-06	56	64	27	78	80	71	7	3	1	3	7	4	11	12	8	201	98	55
Copz2	4.09789	0.558088	4.58469e-09	280	225	177	90	77	105	22	25	18	38	17	22	3	19	42	6	2	0				Cep72	0.264863	1.43719	2.22952e-06	849	948	1358	1165	991	1252	1038	1044	932	730	847	885	934	900	435	451	492	591
Fam43a	2.78672	0.383821	4.59022e-09	945	1038	578	697	1245	1061	62	84	65	50	76	54	402	176	126	734	721	612				Vwa5a	0.392907	-2.14686	2.23249e-06	2866	2800	2642	1673	1456	2099	1307	1499	1553	532	532	602	1111	742	1414	3164	3167	3045
Polk	1.42523	0.216127	4.67452e-09	1813	1671	2200	1810	1864	1896	617	648	563	528	553	518	1410	1046	953	1207	952	761				Hspb11	0.202449	-1.07096	2.29165e-06	209	187	163	150	156	157	200	245	274	166	154	152	95	108	196	239	305	231
Tns4	2.64122	0.371987	4.71354e-09	22059	17348	34872	30402	45017	42553	3634	3616	3226	2703	3024	2632	13403	9224	7533	35419	26484	27993				H2-DMb1	0.556715	-3.00747	2.29462e-06	230	157	194	121	118	126	10	14	9	6	2	3	22	21	55	18	22	85
Medag	9.33777	0.762899	4.95099e-09	592	463	448	104	283	422	0	0	0	0	0	0	0	1	0	0	0	0				Unc93b1	0.247444	-1.33777	2.31064e-06	1249	1414	1124	1002	920	1345	1133	1299	969	1055	1112	1102	1147	824	1732	1972	2182	2423
S100a1	1.65012	0.250059	5.06313e-09	1436	1507	1578	1837	2118	1644	462	489	516	561	489	533	462	390	463	2633	2217	2024				Cttnbp2nl	0.193767	-1.06496	2.32592e-06	2671	2340	2673	2168	3317	2803	1106	1156	1071	1211	1302	1279	3006	2094	2034	4030	3148	3075
Dhrs3	1.76824	0.271119	5.34933e-09	3292	3696	2717	3259	3290	4811	1723	1923	1835	1241	1360	1408	784	681	1136	1500	1532	1364				Arsb	0.21995	-1.1806	2.34741e-06	1662	1668	1765	1342	1374	1568	1381	1496	1431	860	812	1019	804	1022	1032	2035	2001	2467
Itpr1	1.19536	0.18497	5.4092e-09	1803	1612	1956	1788	1896	2010	937	1056	1047	696	772	830	990	1057	1012	1287	1158	949				Pdxk	0.198291	1.10539	2.35286e-06	2240	2128	2715	2113	2333	2141	5405	5725	6513	3854	3660	4207	1587	1895	2836	1785	1821	1294
Il1r1	4.66301	0.546119	5.48528e-09	543	625	346	281	439	776	2	12	11	6	6	5	77	55	13	93	107	103				Foxa1	0.1864	-1.01867	2.41996e-06	4597	5484	4648	3951	5263	5121	1677	1694	1820	1134	1380	1409	4990	4816	2898	4197	4019	4155
Pomgnt2	1.32268	0.208567	5.52798e-09	528	414	357	331	362	394	442	392	422	258	277	292	164	226	362	365	305	299				Gm21814	0.685157	4.31529	2.43235e-06	11	15	10	22	16	13	35	44	26	35	30	20	32	42	36	0	0	3
Defa22	-7.68453	0.846313	5.60416e-09	0	0	0	0	0	0	293	358	500	1030	814	822	175	382	3391	0	2	0				Prelp	0.633852	4.64556	2.45576e-06	55	34	123	236	288	215	1045	969	1223	499	405	628	319	781	3235	14	10	10
Tmem65	-1.47295	0.226372	5.65155e-09	1233	1207	1213	1436	1426	1228	2657	3082	3015	3579	3306	3686	2009	2075	1903	2293	1885	2088				Plekhs1	0.342555	-2.1414	2.45778e-06	7312	6345	7087	6237	10084	12756	20	48	30	50	94	61	1840	1007	161	1294	930	779
Entpd3	3.2858	0.4226	5.88414e-09	1403	1206	1524	1591	2523	2584	66	61	69	31	41	38	949	516	147	75	71	46				Rnf183	0.51233	-4.09642	2.70289e-06	60	72	51	61	70	109	1	0	1	10	16	9	82	45	7	531	374	358
Map9	3.98691	0.580313	6.18097e-09	205	126	154	37	59	50	22	40	36	12	9	10	7	11	36	17	51	59				Lyve1	0.416113	2.50298	2.82749e-06	55	74	72	59	24	62	221	249	177	287	289	275	91	104	197	26	42	25
Nox1	-6.66043	0.715981	6.28304e-09	3	2	0	0	1	2	78	111	125	526	565	523	1692	2079	2535	6393	4460	1509				Spns3	0.601741	3.43884	2.83283e-06	13	19	26	17	22	24	52	80	43	273	274	219	146	49	34	41	24	10
St6gal1	4.14455	0.530462	6.28304e-09	1892	1373	2241	557	1584	1607	79	104	107	37	84	30	822	480	496	98	119	71				Vav3	0.385006	-2.13111	2.84756e-06	236	256	194	212	120	138	135	218	279	129	146	169	165	297	254	387	749	743
Zswim5	-4.73662	0.581885	6.35787e-09	3	11	11	55	32	27	796	709	804	868	838	938	364	494	589	557	448	442				Pck1	0.559277	-2.84664	2.93742e-06	0	0	2	2	2	0	78	83	53	17	19	36	6	2	139	103	99	54
Mansc1	1.86944	0.290702	6.49728e-09	1446	1517	1738	1624	1496	1547	1115	1069	1002	491	605	618	632	728	1141	1310	1348	1080				Ptp4a3	0.264496	-1.49522	3.01354e-06	4703	4023	3731	3527	5786	5263	321	414	342	388	545	512	2303	1527	903	3184	2356	1487
AC171111.1	-7.02368	0.731594	6.52768e-09	0	1	0	6	0	1	1195	1227	1637	216	225	292	118	159	148	3	7	5				Pla2g4f	0.747621	-6.30652	3.05477e-06	6	1	0	1	0	5	0	1	2	1	0	1	10	7	2	297	201	81
Tmbim1	1.00093	0.155567	6.52768e-09	13246	12647	11375	9999	12228	11582	5073	5153	4908	4562	5076	5507	7632	6153	5531	11935	9051	7953				Aldh9a1	0.207734	1.12928	3.06215e-06	2650	2885	2830	3547	2740	2134	9371	9754	8032	8318	9011	9926	4135	5063	5718	4098	3929	3647
Unc119	1.46496	0.228934	6.61103e-09	532	466	427	333	404	413	269	279	301	162	201	242	215	196	278	712	733	538				Rab30	0.524119	3.17976	3.10452e-06	43	40	47	75	73	56	224	238	227	617	809	567	67	69	92	75	54	37
Cndp1	-6.85828	0.819834	6.64284e-09	0	0	0	0	0	0	179	160	163	225	216	217	3	8	43	1	3	0				Gstm7	0.473204	2.94737	3.11657e-06	422	509	563	418	264	363	485	458	319	774	786	883	77	72	114	89	100	33
Fsd1l	-3.13854	0.418378	6.65693e-09	69	87	18	50	44	35	1674	1513	1534	860	933	1023	467	716	1289	140	124	205				Nlrp10	0.592007	-3.35416	3.11657e-06	1527	1072	1328	244	196	494	31	39	27	26	24	32	13	7	27	503	268	110
Colgalt1	1.53114	0.234873	6.82325e-09	13837	12112	12366	8422	13756	14743	5075	5054	4693	3384	3674	4105	5390	5452	4536	6940	5852	5738				Arnt2	0.670386	4.25576	3.125e-06	115	65	222	40	83	84	203	169	286	744	909	566	268	597	237	9	10	47
Col9a3	4.19975	0.526051	6.92391e-09	261	235	319	328	446	348	19	11	16	5	24	17	7	22	18	11	3	11				Pde3b	0.471441	2.88629	3.17691e-06	1306	1172	1256	1342	1321	1307	574	545	678	154	242	198	428	413	290	64	69	29
Scg2	-6.01188	0.70038	6.99115e-09	0	1	1	0	0	2	476	571	688	212	151	212	45	89	308	62	35	20				Olfm4	0.904527	7.13608	3.32648e-06	1	0	1	19	43	8	31350	39164	53331	26952	24780	35173	322	1366	5496	1	40	36
Ube2h	1.19556	0.186899	7.37073e-09	2776	2861	2524	2082	2775	2487	1446	1349	1249	1267	1355	1387	1560	1240	1691	2482	2134	2212				Mtus1	0.203195	-1.08642	3.34328e-06	4145	4429	5047	3827	3014	3032	4617	4930	5025	3591	3991	4230	5644	6015	5956	9729	8875	8070
Sh3pxd2b	1.21615	0.186439	7.43323e-09	4336	4434	4736	3814	5898	5392	1292	1328	1319	972	1210	1206	3475	3125	1716	3646	2799	2614				Ms4a8a	0.606511	-3.79584	3.37934e-06	558	708	158	145	68	130	1181	1397	1231	2718	3059	2396	3161	2635	6337	25733	24899	24811
Wwc2	1.50477	0.227079	7.67382e-09	3235	3393	3443	3099	3581	3649	710	909	744	587	637	611	1391	1534	649	1218	868	824				Slc6a3	0.963792	6.62771	3.45399e-06	0	2	1	0	1	0	26	15	16	110	125	134	0	2	0	0	0	0
Gm37145	1.93663	0.288513	7.90658e-09	451	385	375	395	327	358	50	82	73	71	85	71	139	93	79	362	283	263				Rnf39	0.402204	-2.34745	3.45455e-06	252	281	166	215	183	137	175	248	182	79	104	91	594	390	307	1152	804	775
Fbxo32	2.72593	0.39758	7.97429e-09	1155	1124	846	580	882	1104	168	195	219	110	128	92	977	648	715	694	586	847				Pipox	0.507114	3.62472	3.46931e-06	8	7	19	1	1	1	2231	2271	2061	960	714	809	46	104	395	21	43	28
Lama5	2.19499	0.318024	8.09413e-09	52503	45036	50005	28077	36590	39042	4146	5274	5267	4097	4776	4988	20281	14349	6539	25615	17733	16699				Colca2	0.440491	2.88606	3.52961e-06	884	882	875	658	455	576	1208	1189	900	298	322	351	165	206	441	54	42	37
Lipt2	1.6077	0.24776	8.17568e-09	675	596	588	574	865	767	279	310	273	211	246	269	160	228	223	136	124	110				Mfge8	0.32525	1.86266	3.5334e-06	10422	11130	10400	11697	13067	14155	3267	3655	3420	1679	1806	1680	1640	1653	1505	950	750	506
Bco1	-6.22296	0.670179	8.26639e-09	13	11	10	14	25	14	363	435	319	4022	1840	3108	73	96	102	91	49	44				Pde7a	0.248736	-1.36617	3.53641e-06	946	915	1179	1161	1450	1301	922	903	831	1023	1046	1050	1243	1177	1186	3994	3211	2270
Cox10	-1.40087	0.219493	8.26639e-09	583	561	492	591	703	630	1122	1033	984	1035	1197	1446	845	1029	642	1171	1133	890				3110039I08Rik	0.685287	-5.30472	3.69858e-06	2058	1146	1452	1129	1277	1323	4	1	3	0	1	1	115	34	4	369	551	56
Cbarp	2.40496	0.362046	8.68166e-09	998	893	692	494	834	785	332	304	234	139	155	167	217	171	252	217	176	151				Nr2e3	0.781247	5.52596	3.73497e-06	0	0	0	0	0	0	201	217	99	72	101	126	6	24	48	0	1	1
Sdf2	1.15097	0.180645	8.74578e-09	2326	2199	2048	2116	2445	2143	999	1267	1038	1130	1147	1144	1123	990	1243	1825	1671	1502				Apol6	0.710669	-5.28011	3.81109e-06	0	1	0	0	0	1	1	1	2	6	5	3	3	2	8	37	172	207
Ipmk	-1.33259	0.205969	9.01353e-09	1749	1918	1748	1801	1573	1551	4792	5574	4818	5315	5778	5837	4755	4664	6001	7682	6472	6143				Defa32	0.832357	6.52839	3.88837e-06	0	0	0	0	0	0	494	844	889	2047	1528	1814	612	1412	12339	0	5	0
Shroom4	3.39978	0.47281	9.07696e-09	317	242	337	294	317	364	37	52	28	12	16	12	154	93	99	307	247	328				Tnfrsf21	0.356762	-1.97439	3.92033e-06	5912	6898	3323	2724	3081	2753	797	916	688	580	722	587	1855	1493	1246	3414	2996	2908
Vstm2l	-5.65009	0.725479	9.14843e-09	0	1	1	1	0	0	42	49	26	63	63	69	39	52	47	50	37	17				Hmgcs2	0.608815	-2.93151	3.95826e-06	248	419	54	118	145	109	3003	3071	2279	488	468	705	5	28	59	1932	5429	9552
Smim24	-5.02006	0.549554	9.19332e-09	98	191	33	110	109	112	15456	15742	16334	23923	22087	24788	511	940	7919	1270	1046	1025				Homer2	0.199909	1.08797	4.18119e-06	8499	9209	6853	7970	8390	7993	4838	5272	5547	3670	3645	4412	1597	2528	2383	2447	1893	1398
Mep1b	-6.63889	0.660236	9.75533e-09	31	39	1	81	19	14	4443	6376	5032	12452	12153	10523	1291	2201	5111	5040	4441	3462				4931406C07Rik	0.334905	-1.818	4.25305e-06	3004	3463	2682	4743	3727	2558	4447	5359	4745	5828	6128	5743	3066	2938	6525	13682	16593	15544
Zfp248	2.505	0.370044	9.81938e-09	128	132	85	112	136	91	19	27	20	15	20	17	39	51	37	33	43	29				Mfhas1	0.476996	-2.8637	4.30132e-06	643	729	683	590	858	722	33	26	41	63	59	53	465	175	284	222	495	707
Pnpla1	-5.56672	0.780661	9.89791e-09	0	0	0	0	0	0	174	132	132	75	86	98	9	10	72	23	19	40				Asb16	0.560733	3.69674	4.35282e-06	140	175	174	321	213	173	174	217	99	120	81	119	6	40	57	7	5	5
Mmp15	2.11983	0.319318	1.01383e-08	12453	13278	12147	12867	15899	17420	2189	2755	2919	3456	3741	3326	6288	5420	6743	13029	13694	12747				Klf4	0.351281	-1.95692	4.43842e-06	2913	4322	1328	2800	3986	2804	2119	2103	1607	1456	1585	1195	3384	2881	2972	7456	7438	6548
Pter	-1.0174	0.160203	1.02943e-08	497	534	459	461	432	432	1131	1155	1021	965	965	1061	434	498	456	648	476	419				Capn13	0.430946	-2.31456	4.53126e-06	1443	1959	710	1367	2245	2367	555	581	455	433	485	476	141	208	467	2659	2153	967
Tmem231	3.03523	0.437132	1.09394e-08	583	566	500	474	472	535	99	126	96	44	31	56	146	86	111	128	148	108				Tspan13	0.377487	2.20086	4.57793e-06	2516	2746	2500	3428	3855	2501	2042	2129	2053	3040	2963	3006	1003	1378	2257	714	480	300
Fbp1	-5.41317	0.591276	1.09652e-08	13	29	5	2	12	5	1684	1997	1671	2696	2541	2503	50	77	384	1	4	0				Reg3a	0.977503	7.9966	4.60493e-06	2	3	0	0	0	0	360	349	371	4631	3629	4116	8	14	132	0	0	0
Zfp385b	3.51202	0.556173	1.10459e-08	61	98	38	16	19	23	41	34	28	5	6	11	1	0	6	7	9	9				Agtpbp1	0.303154	-1.70557	4.64269e-06	701	656	490	414	398	440	134	175	170	180	171	145	483	389	206	1139	695	698
Snx10	1.10679	0.174142	1.10954e-08	1908	1960	1867	2237	2162	2063	941	1088	982	727	721	882	1382	1268	1119	1192	1049	1096				Dmgdh	0.85499	-6.20511	4.79206e-06	0	0	0	0	0	0	0	1	0	2	0	1	1	1	7	18	69	157
Uggt2	2.95853	0.442901	1.21217e-08	336	324	269	262	270	233	115	117	86	34	41	52	28	28	51	120	145	62				Plpp1	0.487935	2.91206	4.88646e-06	143	156	132	311	316	231	744	733	787	1591	1523	1539	310	378	622	179	108	154
Tnfsf13b	-3.92043	0.528208	1.2259e-08	10	11	7	2	7	5	101	149	132	167	168	171	156	194	178	157	399	434				Meis2	0.773162	5.17268	4.932e-06	1626	1832	1289	2390	2569	1565	803	980	1014	53	80	68	32	32	8	10	10	4
Kcnh2	2.03911	0.321906	1.23783e-08	365	313	204	178	174	167	137	134	128	126	136	118	109	169	293	37	35	34				6430548M08Rik	0.26515	-1.39087	5.3694e-06	821	858	801	820	744	879	451	522	514	619	642	673	420	460	827	1130	1315	1197
Ccrl2	3.55376	0.512846	1.2428e-08	165	167	149	61	87	123	21	37	33	18	6	12	30	16	48	40	39	32				Cyp2e1	0.853099	5.96016	5.40244e-06	1	0	0	0	0	0	93	148	146	142	101	112	2	32	40	0	0	1
Id2	2.23139	0.334249	1.25214e-08	3985	3920	3562	2495	2923	3534	619	792	606	654	836	798	1169	1317	1164	472	423	197				C1qtnf6	0.404955	-2.10743	5.49333e-06	894	1012	1172	1406	1791	1302	85	91	65	92	104	95	28	39	116	284	356	231
Capsl	4.32812	0.573542	1.25734e-08	342	311	320	169	399	374	21	35	42	12	4	5	36	42	45	18	27	16				Cym	0.823885	5.17839	5.60926e-06	13625	8496	7097	2125	8612	21944	11	14	13	34	29	30	5	4	2	0	0	0
Eva1c	4.11126	0.501819	1.29752e-08	1051	933	1143	930	1332	1432	6	22	5	33	32	9	207	146	45	313	203	176				Chodl	0.756072	-6.4309	5.62178e-06	122	88	46	65	95	113	1	0	1	0	1	0	5	4	1	386	224	27
Rell1	1.45007	0.22564	1.29752e-08	2887	2878	3347	3902	4170	3939	954	1143	1047	1066	1091	1027	2079	1828	1710	3959	3628	3439				Tdrd5	0.663889	3.79466	5.70299e-06	483	360	205	367	450	459	10	12	14	7	14	16	27	17	4	2	1	1
Galnt4	1.58897	0.252428	1.29759e-08	8034	9290	7781	7646	5187	6111	4473	4943	5431	3204	3278	3616	4118	4064	5729	5113	5412	5591				Slc40a1	0.395301	-2.0446	5.71794e-06	2060	1625	2346	1900	1615	1643	6662	9574	7445	3753	2927	2898	2983	1759	9114	10109	13794	8816
B630019K06Rik	3.11694	0.459606	1.32533e-08	88	110	86	82	95	88	25	38	29	11	18	16	14	9	28	8	26	23				Gm42815	0.421066	-2.52289	5.71973e-06	20	16	19	12	13	14	16	8	11	7	8	12	11	14	10	73	77	46
Il18r1	3.29346	0.424107	1.32533e-08	1277	1302	1209	1281	1875	1487	39	32	45	23	29	21	459	151	46	253	139	106				Hsf2bp	0.433765	-2.72872	5.81273e-06	18	14	19	25	21	18	6	11	6	8	10	2	20	24	10	75	73	87
Tceal8	5.23646	0.646998	1.3495e-08	722	671	297	119	119	64	11	26	12	13	7	6	25	25	46	1	5	1				Plekhg1	0.279372	-1.40896	5.89867e-06	536	601	351	322	370	365	542	554	632	249	262	306	131	139	301	636	599	558
Fer1l4	5.20801	0.591193	1.36157e-08	6545	7487	4093	3240	3450	4026	25	32	13	80	125	90	248	205	129	926	1043	734				Tmeff1	0.534818	-3.18207	5.94038e-06	1511	1297	1290	1799	2537	2179	153	223	112	26	58	37	1104	929	707	1469	1360	1033
Txnrd2	-1.67259	0.263088	1.38251e-08	254	326	290	371	324	326	674	791	619	792	786	962	757	1017	633	498	467	449				Usp2	0.308179	1.73469	5.99582e-06	30	27	31	24	25	35	340	346	222	235	210	167	59	92	170	42	42	46
Ablim1	1.69032	0.255636	1.39198e-08	10940	11249	12166	13712	16556	14284	1555	1691	1482	2416	2136	2200	5072	4544	2399	17189	13111	11768				Ltb4r1	0.705973	4.37929	6.40128e-06	17	10	7	14	15	31	13	15	22	86	61	65	7	10	1	5	4	0
Eda2r	3.34265	0.465423	1.43165e-08	1783	1461	2647	1707	2127	2558	133	202	324	88	110	156	894	624	589	1196	1114	619				Gm17783	0.806203	5.98718	6.61205e-06	0	0	0	0	0	0	700	716	677	102	81	105	84	100	321	0	2	1
Mfsd12	1.38855	0.220161	1.48762e-08	1067	1133	1313	986	1219	1181	519	608	553	558	585	656	300	309	430	514	502	453				Cotl1	0.328927	1.84992	6.67623e-06	4605	5307	2676	2039	2106	3000	5537	5665	5292	4695	5237	6410	3367	5764	4989	1390	1147	1180
Ifi27l2b	-3.67677	0.4828	1.51827e-08	373	645	326	495	230	208	6138	6951	6317	11456	10535	9778	1773	2049	3674	5296	5692	4447				Sh3kbp1	0.484926	-3.26373	6.67623e-06	438	350	528	1490	2148	1513	120	139	173	95	174	100	1509	1074	287	4239	3788	3557
Galntl6	3.04568	0.444304	1.53168e-08	232	345	191	482	311	187	57	60	44	34	34	44	67	73	104	97	70	88				Ugt2a3	0.800792	7.458	6.67866e-06	9	6	0	0	0	0	965	1143	1025	1631	1563	1482	1	2	42	0	1	2
Foxa2	2.61321	0.399343	1.58783e-08	2223	2309	1662	1476	1956	1760	566	631	758	350	360	394	189	368	377	799	571	268				Vav2	0.209712	1.11064	6.67866e-06	2412	2398	2644	1646	2206	2374	2135	2135	2310	1978	2085	2024	1728	1815	1857	1013	742	1144
Stra6	8.49808	0.749505	1.60403e-08	1493	1159	5606	3114	5516	10520	0	4	2	0	0	1	502	221	60	326	156	26				Lrrc66	0.240836	-1.28115	6.85228e-06	3597	3080	3528	3335	4071	4447	1208	1302	1159	1262	1601	1465	2439	1480	1814	4445	3832	4283
Runx1	1.78524	0.273572	1.63054e-08	2471	2811	2627	2356	2719	2579	699	769	516	416	497	429	1350	1080	712	1796	1367	1504				Cblb	0.193034	-1.00497	6.88339e-06	1148	1054	1525	1412	1274	1310	892	944	813	776	859	929	919	837	977	1960	1869	1710
Twsg1	1.36114	0.216034	1.64399e-08	3488	3531	3769	3240	4269	4366	1995	2123	1991	1415	1355	1510	1304	1493	1417	1817	1736	1677				Cyp2b13	0.76144	5.02146	6.88339e-06	1	1	0	3	1	0	22	26	13	48	58	47	1	1	1	1	2	0
Eps8l1	3.03329	0.441205	1.65165e-08	2091	2430	1467	1140	1577	1410	330	327	360	139	151	158	694	397	522	547	354	420				Hipk2	0.256601	1.35233	6.92234e-06	1136	1283	1198	1465	2158	1522	3811	4302	5110	4014	4192	4548	2157	2668	2381	1819	1750	2097
Rrp12	-1.28069	0.206013	1.77456e-08	659	674	633	564	747	617	1090	1160	1191	884	1111	1222	1312	1880	875	1115	934	910				1700066B19Rik	0.322044	-1.71508	7.12189e-06	1126	1146	1136	2060	1800	1453	349	459	321	203	293	262	544	485	631	1223	1056	969
Hoxa3	-5.58674	0.735932	1.82241e-08	1	0	0	1	0	0	67	67	39	87	81	138	44	122	173	849	738	618				Sval1	0.543525	-3.12013	7.14165e-06	0	0	0	0	0	0	46	29	56	49	80	51	48	95	474	290	275	114
Sema6d	-5.19753	0.579852	1.86648e-08	23	12	8	2	8	3	1270	1060	935	1705	1819	1924	147	434	1520	1217	1325	1818				Gsta1	0.602075	3.54159	7.23162e-06	4213	6179	1328	2418	1414	683	5764	7949	6400	17901	16640	16752	2672	1702	904	1467	1014	1093
Ulk2	1.10684	0.179304	1.86684e-08	1025	1069	934	823	882	968	775	789	938	545	596	579	590	605	819	1030	943	957				Gprc5b	0.495609	2.72982	7.38291e-06	1060	1015	2121	2287	3149	1923	47	51	37	17	41	27	85	75	28	7	12	11
Fam20a	-5.48937	0.66414	1.87599e-08	1	2	1	3	2	0	524	571	532	150	122	167	149	170	470	0	0	0				Mboat2	0.35873	-2.04002	7.69781e-06	2146	2362	2087	1857	1605	1792	115	117	76	152	80	129	111	49	43	1100	653	594
Rsu1	1.41939	0.225243	1.9078e-08	1458	1480	1177	1183	1594	1452	695	607	581	447	499	566	938	765	894	1264	1064	758				Dennd5b	0.23802	1.26693	8.22767e-06	166	129	136	129	149	145	1089	980	1033	1004	1060	1111	454	671	1023	396	235	349
Samd4	2.96747	0.405889	1.94089e-08	638	586	657	668	827	925	28	30	41	22	45	31	295	99	66	37	24	45				Padi2	0.665206	-4.10797	8.22767e-06	242	114	272	178	342	337	20	15	20	4	6	9	6	6	9	47	110	696
Fam216a	1.88115	0.292324	2.00221e-08	573	503	623	510	620	631	172	229	207	115	137	114	227	254	200	244	236	226				Serpinb9b	0.57833	2.72945	8.25544e-06	471	385	427	353	1445	1624	37	57	39	185	284	155	2097	925	108	65	86	43
Sept8	1.07776	0.172406	2.0245e-08	4706	4685	4056	3705	3909	3341	1799	1791	1727	1530	1827	1749	4414	3835	3286	4235	3450	3163				Mkx	0.74452	-3.92954	8.29378e-06	4	2	6	1	4	12	7	3	0	2	3	0	1	2	37	19	32	34
Fmnl2	1.50923	0.233533	2.04225e-08	4027	3960	5667	5229	4821	4694	810	978	1150	842	942	863	2360	1920	1070	3391	2412	2492				Itga1	0.49917	3.28141	8.51136e-06	2519	2443	1446	1541	1350	1424	1667	1934	2426	803	882	838	520	444	1585	153	43	23
Trib2	4.66244	0.618263	2.05959e-08	216	202	262	174	283	333	38	32	23	1	6	4	17	16	50	7	9	5				Insyn1	0.326339	-1.67982	8.65486e-06	456	403	286	239	387	370	16	23	29	27	23	25	37	46	50	68	65	84
Fuz	2.82021	0.44094	2.0817e-08	1172	1116	854	743	678	686	451	510	318	139	151	149	165	222	328	233	240	281				Gdf9	0.721413	4.76217	8.67837e-06	5	4	5	1	0	9	23	38	36	78	61	96	6	3	1	2	3	1
Rnf32	-2.94691	0.416364	2.08839e-08	95	88	44	59	35	50	971	1004	1142	540	482	638	674	970	773	817	905	658				Igsf9b	0.284824	-1.48868	8.71021e-06	779	460	683	767	981	805	447	510	530	324	374	469	772	612	1000	1241	1063	1185
Defa21	-7.40073	0.846766	2.08913e-08	0	0	0	0	0	0	225	333	471	827	608	685	93	247	2235	0	0	1				AW112010	0.434049	-2.42212	8.86946e-06	388	425	195	428	569	555	133	157	138	242	254	221	502	389	827	1049	995	1150
AI427809	-5.76587	0.782831	2.11413e-08	0	0	0	0	1	0	278	258	175	118	92	87	28	57	193	9	16	31				Dusp12	0.235514	1.25023	8.91598e-06	475	443	325	258	287	356	881	905	919	998	963	1002	399	569	650	365	318	305
Slc48a1	1.81565	0.284839	2.12397e-08	2674	2613	1988	2490	1984	1807	948	918	897	498	551	649	817	848	720	1006	950	846				Tnfsf10	0.433985	2.7957	8.96879e-06	27	24	17	18	8	17	1683	1725	2887	643	521	716	155	234	1034	41	70	45
Wdr45	1.89692	0.296563	2.18018e-08	1404	1403	1035	917	1139	1136	419	519	470	268	265	299	394	325	331	466	403	337				Arsg	0.256464	1.38619	8.97861e-06	265	238	180	180	152	234	358	436	408	380	312	323	139	99	221	113	95	97
Map3k12	2.23454	0.351747	2.19592e-08	291	314	217	143	213	237	129	110	108	99	87	96	49	27	90	96	92	62				Klhl23	0.52694	3.33716	8.97861e-06	227	228	206	218	250	218	1426	1248	903	235	234	317	187	203	255	56	46	34
Pde1b	-4.48288	0.584192	2.20893e-08	2	1	1	0	1	5	397	433	344	126	156	167	30	61	221	14	25	31				Clcn5	0.218677	1.09345	9.09047e-06	3055	2762	3569	3768	5810	4834	1113	1226	1355	1420	1642	1581	2756	2490	1005	1658	1267	1358
Maged1	1.80455	0.283558	2.21671e-08	10114	9249	8822	7596	8824	9220	3754	3910	3600	1915	2077	2408	3755	4209	3308	3535	3365	3098				Ptprd	0.349782	-1.83838	9.09047e-06	1965	1473	1842	526	1022	1066	2341	2765	3094	2103	2398	2268	3304	3587	4858	7966	6528	6427
Ggcx	1.8148	0.285192	2.35574e-08	1098	1174	981	1072	1164	1004	486	484	447	219	271	307	314	318	301	266	241	215				Gramd1b	0.446718	2.50171	9.09402e-06	2085	2220	2026	1231	1762	1739	692	796	707	1590	1920	1867	1428	1624	1124	212	322	302
Tfcp2	1.65224	0.268445	2.39663e-08	781	767	614	416	595	639	537	508	416	280	307	325	237	349	456	609	466	499				Cnpy1	0.662786	4.84875	9.67402e-06	1	2	3	3	2	0	194	227	161	452	162	279	1	5	17	7	3	1
Itln1	-5.26114	0.591347	2.4126e-08	144	67	218	212	363	625	36338	42389	57892	36339	30856	33525	4824	12515	34045	374	472	449				Sfrp5	0.930451	6.30042	9.68585e-06	4	3	7	3	4	4	312	278	230	10	17	28	8	10	7	0	0	0
Slc2a2	-9.7279	0.817669	2.4126e-08	0	0	0	2	0	1	1574	2086	2220	10847	8681	9980	8	13	107	0	1	1				Ctgf	0.525592	-3.70807	9.79289e-06	20661	16378	26316	60515	78322	86553	33	64	20	66	204	93	12858	6628	986	8639	5316	3449
Galnt7	1.47284	0.237818	2.43242e-08	11214	12684	10482	12471	10241	8881	5958	6501	5659	6351	6386	6527	5127	5199	8813	8705	8564	8363				Dusp22	0.562792	-3.60314	1.0026e-05	136	100	77	27	102	57	4	9	5	11	10	6	57	18	17	158	228	116
Oprd1	3.8647	0.55144	2.46192e-08	43	49	41	62	32	47	4	6	5	5	3	1	8	17	18	8	12	5				Sidt1	0.256951	-1.26854	1.00435e-05	2037	2249	1618	1386	1159	1307	624	535	615	325	428	462	565	706	1133	534	868	818
Gm5485	-7.48542	0.819019	2.50601e-08	0	0	0	0	0	0	103	197	131	801	691	589	178	189	1241	936	1491	909				Trpt1	0.219728	-1.0984	1.03473e-05	226	208	180	129	129	167	103	117	102	90	94	107	93	94	168	180	139	144
Bcat2	1.48351	0.2331	2.64524e-08	4844	5600	4037	4021	3947	3934	1237	1329	1089	977	1039	1180	2038	2152	1141	1983	1516	1306				Lrrk2	0.950811	-7.30272	1.05059e-05	70	99	4	3	31	13	0	0	0	0	0	0	0	0	0	432	209	59
Hgfac	2.63175	0.3938	2.65617e-08	11010	11918	13570	12445	10649	11595	1449	1933	1146	2299	2347	2021	2893	1741	3042	15395	13309	10349				Glns-ps1	0.47347	-2.30009	1.0534e-05	2182	2490	1451	871	845	1127	629	644	711	159	182	226	178	204	408	1596	1235	761
Robo1	8.23208	0.595519	2.71644e-08	1288	1100	2386	1084	1668	2028	3	7	2	0	1	2	0	2	0	1	0	1				Oit1	0.420835	-2.17459	1.06415e-05	3853	4534	1939	1492	1064	2072	3972	3949	3435	4373	4423	3843	1048	1360	2833	16006	12296	7652
Ush1g	9.21852	0.694427	2.77439e-08	1088	952	1533	262	510	1435	1	2	1	0	0	0	0	0	0	0	0	0				Stox2	0.361728	1.94714	1.09923e-05	908	795	783	854	1174	1109	106	106	149	59	95	56	210	237	174	33	20	33
Hrct1	5.08104	0.619598	2.85285e-08	156	159	94	112	85	81	5	5	2	1	1	0	14	3	5	13	16	16				Myof	0.404878	-2.42762	1.10608e-05	25893	25634	21521	21785	28032	25865	624	875	489	1576	2213	1325	19575	12571	4535	22856	14569	14645
Layn	6.62976	0.814107	2.88128e-08	83	46	51	23	20	37	0	0	1	0	0	0	3	3	4	0	0	0				Slc4a4	0.386901	2.25006	1.12712e-05	15700	13525	15828	10263	14239	14756	5264	5980	4669	4454	4145	4619	3525	2319	5349	337	693	1181
Slc50a1	1.39833	0.22353	2.91405e-08	2862	2746	2834	2782	2333	2534	1181	1101	1078	671	854	999	1362	1275	1071	1887	1420	1187				Whrn	0.239841	-1.20826	1.13298e-05	504	527	506	268	334	365	1083	1022	930	605	629	695	599	735	900	1495	1295	1356
Cd200r3	5.65422	0.787418	2.94041e-08	69	69	62	61	175	147	0	1	0	0	0	0	138	58	29	27	18	26				4931440F15Rik	0.76205	-5.61901	1.1585e-05	0	1	1	0	1	1	0	0	0	0	3	1	20	5	7	65	96	82
Ttc7b	-1.95636	0.308282	2.94041e-08	37	42	32	49	74	60	175	179	217	143	150	149	253	212	198	313	269	249				Rin2	0.262923	-1.38395	1.17871e-05	2828	3074	4198	4271	5729	5005	2534	2758	2733	1929	2046	2160	5610	5201	4349	9054	8007	6987
Gm9917	-2.83209	0.425476	2.97456e-08	18	28	17	31	55	25	129	150	114	161	201	198	210	144	159	687	688	567				Smlr1	0.951267	7.25466	1.21941e-05	0	0	0	0	0	0	143	160	121	461	436	475	1	2	32	0	0	0
Tigit	6.52863	0.638692	2.98963e-08	1559	1071	1761	723	1204	1348	0	0	1	5	6	1	91	34	5	11	4	10				Tpcn1	0.212206	-1.0843	1.28684e-05	984	1139	1116	828	1053	1037	1376	1447	1286	1647	1615	1712	1626	1672	1925	4014	3311	2725
Trim40	-4.63653	0.581889	3.00775e-08	15	26	25	18	6	15	350	329	213	754	907	760	780	425	787	1223	1244	1318				2010001K21Rik	0.592527	3.82105	1.29054e-05	6	14	4	1	9	14	391	305	308	108	103	108	36	68	210	8	3	4
Usp43	-1.3728	0.224412	3.05095e-08	923	941	1044	1261	1492	1376	1684	1915	1756	1702	1904	2161	2792	3345	1810	2934	2435	2561				Bend7	0.737485	5.36848	1.37765e-05	430	364	388	174	323	462	239	259	335	117	121	125	3	5	63	1	0	0
Phf21b	-1.83773	0.29261	3.15907e-08	146	170	221	244	155	176	621	625	586	406	470	489	815	890	537	930	858	692				Ugt2b36	0.592466	3.78925	1.41564e-05	0	1	0	0	0	2	248	238	250	362	451	450	15	27	78	7	5	23
Gm12420	-1.33377	0.213787	3.22885e-08	175	148	219	181	189	168	510	568	584	518	562	571	522	581	653	395	400	408				Syna	0.710199	4.83119	1.42614e-05	2	6	0	3	1	0	222	178	79	74	121	116	1	11	15	2	2	1
Dclk1	3.36158	0.5831	3.24343e-08	1151	852	2189	314	691	666	1108	1137	1455	276	191	235	72	154	1387	8	9	21				Nat8f5	0.887232	6.71136	1.42666e-05	0	0	0	0	0	0	71	96	107	506	353	369	0	4	3	0	0	2
Gm7208	-5.96259	0.772728	3.2653e-08	0	0	0	1	0	0	412	422	385	253	280	220	6	10	119	4	27	10				Gm45330	0.467116	2.51297	1.43804e-05	12	6	6	15	10	8	62	51	81	46	34	42	49	54	56	5	11	7
Itga9	5.02762	0.654489	3.28382e-08	614	416	831	299	886	867	46	53	75	3	14	10	3	5	21	1	7	21				Eno3	0.47587	-2.69668	1.4505e-05	282	285	282	173	105	139	404	520	342	835	909	764	508	449	699	5641	4531	2629
Gm13991	1.37367	0.223922	3.31927e-08	534	566	468	353	432	379	261	288	312	211	224	266	242	189	294	405	336	314				Txnrd2	0.226443	1.13288	1.46076e-05	254	326	290	371	324	326	674	791	619	792	786	962	757	1017	633	498	467	449
Oat	-1.61123	0.244036	3.32778e-08	5633	5257	6838	4682	4524	5458	73939	83697	92073	65431	57462	73226	7227	13736	46899	3676	3653	3572				Gm17753	0.908653	6.76795	1.47104e-05	0	0	0	0	0	0	94	67	60	93	74	94	0	0	2	0	0	0
4930539E08Rik	-4.83034	0.584189	3.43799e-08	14	16	3	0	1	1	561	632	701	359	451	299	543	347	1052	478	416	341				Gsta3	0.650352	3.71604	1.58245e-05	8118	8962	8067	9726	4426	3458	568	792	542	2972	3763	3590	4636	4865	2328	434	159	46
Asz1	7.93167	0.773215	3.49948e-08	1385	769	930	385	725	493	0	2	7	0	0	0	5	0	9	0	0	0				Dgat1	0.464711	2.70198	1.64702e-05	1171	1311	914	800	1159	1038	6506	7065	6353	16643	15855	16883	946	1334	2614	1491	1273	1328
Cd63	1.02998	0.168945	3.51488e-08	1625	1646	1317	1334	1817	1655	887	1007	1092	806	863	983	787	991	998	1585	1522	1477				Rnd2	0.441636	2.37691	1.65378e-05	124	169	135	104	149	140	274	296	234	636	652	678	184	233	179	106	101	118
Tecpr2	1.00979	0.16537	3.61185e-08	1149	994	1222	1011	1090	1060	623	626	716	548	632	585	592	614	663	756	599	576				Gpr137b	0.497634	-3.1167	1.7044e-05	1328	1044	780	1636	1614	1478	10	38	51	54	123	75	1646	535	362	1731	1182	1169
Loxl1	7.24837	0.755742	3.70792e-08	147	123	63	31	37	69	1	1	0	0	0	0	0	0	0	0	0	0				Ier3	0.475205	-2.87466	1.72523e-05	4863	3735	6850	3828	5387	4617	226	340	217	779	870	646	2569	1260	845	8150	7876	8211
Tent5b	2.72384	0.383038	3.73051e-08	999	943	894	702	908	778	49	66	41	36	54	33	244	141	45	449	251	228				Ikzf2	0.626034	-3.65104	1.73998e-05	426	337	324	117	131	250	14	7	19	0	6	2	100	51	39	146	141	176
Tmem40	3.48708	0.46892	3.75562e-08	718	624	395	476	631	522	8	20	9	32	29	23	267	137	77	67	61	36				Ifitm3	0.461569	2.71946	1.77399e-05	1554	1240	4549	1470	2207	2269	1195	1201	895	498	491	998	1239	1744	1787	100	114	108
Fkbp9	2.66625	0.39703	3.91207e-08	5120	4657	4426	3939	4436	4353	766	871	740	314	447	408	829	707	462	1869	1559	924				Ifit1bl2	0.701137	4.30232	1.79281e-05	0	0	0	1	0	1	176	203	325	1733	1365	1155	157	189	254	25	30	27
Rars	-1.31963	0.217065	3.92317e-08	3495	3529	3726	4657	4706	4408	5666	5808	6002	6568	7327	7992	11182	10920	7237	7148	6824	6734				Treh	0.868718	6.91531	1.80783e-05	1	0	13	2	2	0	1413	1970	1660	3476	2898	3598	2	23	71	5	7	0
Gm19557	5.08936	0.639122	4.09445e-08	116	157	111	92	85	72	0	0	2	0	3	4	16	15	6	11	13	13				Paox	0.211773	1.06691	1.84124e-05	1061	1099	909	1382	1566	1097	655	783	645	596	629	623	621	551	556	428	356	330
Dtx3	3.05361	0.454812	4.28121e-08	2229	1933	1349	905	932	1094	269	276	291	109	133	144	619	502	437	226	239	203				Tmed6	0.409226	2.36255	1.85813e-05	148	161	228	312	216	143	411	459	449	321	268	331	141	296	549	25	58	40
Pipox	-4.99595	0.568573	4.29834e-08	8	7	19	1	1	1	2231	2271	2061	960	714	809	46	104	395	21	43	28				Slc5a8	0.771891	-4.60636	1.88287e-05	3	3	3	1	16	15	2	8	8	20	30	21	14	102	608	309	323	544
Epn2	1.61862	0.258053	4.54542e-08	2227	2273	2197	1966	2369	3413	624	711	812	505	586	669	1346	1259	983	1656	1236	1260				Afm	0.712484	-2.80592	2.01226e-05	25	32	16	12	6	12	76	34	30	0	2	3	0	0	2	113	178	90
Il22ra1	-2.11128	0.332431	4.62573e-08	372	409	293	205	202	313	1036	1000	1108	1136	1334	1370	1518	1561	1127	1098	804	824				Miat	0.83704	5.11532	2.03239e-05	5	3	0	0	0	2	45	59	60	37	45	115	21	122	24	2	0	0
Palmd	6.38474	0.629752	4.65416e-08	1589	1277	1010	1297	3853	2077	0	4	0	8	14	5	42	27	12	7	2	0				Adgra2	0.652852	-5.73661	2.03963e-05	11	29	26	75	101	95	4	2	0	2	2	4	18	12	3	897	500	153
Cyp26b1	5.45124	0.675189	4.72918e-08	144	148	354	443	345	567	4	15	2	7	12	10	88	51	414	17	151	152				Cyp2c29	0.957987	7.4218	2.04917e-05	0	7	0	0	0	0	2635	2482	2089	1023	873	981	7	215	162	0	0	0
D130043K22Rik	-7.58948	0.796539	4.73563e-08	0	0	0	0	2	0	89	128	87	777	640	665	12	17	40	367	373	364				Cd200r3	0.77765	-4.04351	2.07062e-05	69	69	62	61	175	147	0	1	0	0	0	0	138	58	29	27	18	26
Bcas3	1.04301	0.172752	4.76874e-08	1093	1115	840	715	1029	945	703	644	640	506	557	566	647	682	765	958	814	786				Gm20442	0.584256	-4.27043	2.07435e-05	8	13	22	16	14	11	0	2	0	8	10	4	19	9	6	151	180	183
Tpst1	1.4153	0.225931	4.81726e-08	745	658	708	818	974	870	187	218	254	153	181	195	376	381	220	281	267	248				Alox12	0.69186	-4.57847	2.14071e-05	386	350	281	238	227	237	2	1	1	0	0	0	13	9	2	114	51	18
Mterf2	-1.81084	0.284425	4.90463e-08	94	71	58	89	93	93	382	488	399	437	411	482	158	161	262	244	241	226				Fsd1l	0.368015	2.04974	2.1411e-05	69	87	18	50	44	35	1674	1513	1534	860	933	1023	467	716	1289	140	124	205
Rhpn1	4.69022	0.567029	4.90463e-08	275	194	193	96	199	299	5	6	3	4	10	4	12	7	7	8	8	9				Pgc	0.747283	5.47931	2.20371e-05	4000	5049	9574	5200	6173	3264	147	245	265	53	30	50	4	36	19	2	1	0
Defa31	-7.41627	0.854794	4.9411e-08	0	0	0	0	0	0	171	196	221	563	395	457	20	31	234	0	0	0				Ryr2	0.886657	-8.20367	2.21125e-05	1	4	0	1	2	3	1	0	0	0	0	0	1	0	0	39	435	470
Nav1	1.71338	0.280448	5.10152e-08	1741	1734	1655	1248	1852	1888	1077	983	1099	680	700	908	337	462	679	311	211	145				Dsg1c	0.937806	4.56194	2.21167e-05	0	1	3	1	8	1	7	7	4	11	12	9	17	21	4	0	0	0
Cyp1a1	-6.28583	0.773223	5.18622e-08	1	0	0	0	1	1	24	28	16	187	120	152	141	201	95	242	222	144				Rdx	0.779209	-4.96066	2.23751e-05	1449	1048	2775	538	713	668	23	33	26	8	4	1	88	22	31	2270	1514	181
Hsd3b2	-5.12643	0.827015	5.30075e-08	0	0	0	0	0	0	15	25	12	9	20	8	22	24	11	215	243	402				Slc2a6	0.477003	-2.88747	2.24962e-05	243	260	191	426	285	179	9	33	15	43	43	23	69	40	27	342	443	411
Car11	4.81331	0.61661	5.31655e-08	155	186	109	50	44	87	18	8	6	3	4	1	4	3	8	1	6	4				Reg3b	0.807968	6.04455	2.26896e-05	1329	1217	322	140	138	221	220	377	1040	2053	1212	1483	226	182	2241	0	1	6
Fndc4	3.41145	0.508819	5.366e-08	149	134	122	89	65	109	29	26	12	9	11	18	10	30	24	6	15	7				Trim34a	0.316878	-1.64857	2.26896e-05	179	157	159	192	200	163	80	102	107	137	109	93	212	102	166	405	378	408
Fzd5	-1.16462	0.189606	5.45622e-08	2025	2334	1586	1356	1724	1468	6338	6114	5681	4493	5245	5320	3053	3554	3930	3303	2675	2576				Fes	0.567438	-3.33075	2.32154e-05	256	236	192	259	316	133	47	45	20	11	15	5	75	36	39	530	393	156
Piwil4	-4.23782	0.590617	5.50376e-08	6	2	1	1	1	0	104	90	102	92	132	141	44	91	196	13	15	12				Nr3c2	0.3627	-1.8837	2.32156e-05	173	174	163	111	85	104	567	620	727	938	995	1029	821	740	1365	2705	2381	2485
Gpx8	5.85873	0.626524	5.52258e-08	598	458	658	648	940	815	8	5	16	3	0	0	18	21	6	2	0	0				Spata6	0.415206	-2.59317	2.32739e-05	1621	1575	1246	1471	1638	1379	21	56	22	27	82	29	100	45	14	746	650	625
2010003K11Rik	-4.51581	0.579763	5.59915e-08	15	22	7	24	20	7	241	313	270	709	691	646	161	126	231	438	348	198				Pitpnc1	0.318492	-1.6052	2.33263e-05	1484	1412	1522	917	1411	1249	169	251	242	97	108	167	575	489	410	615	498	611
Usp12	-1.74771	0.281364	5.60973e-08	817	874	741	928	767	684	2030	2185	2027	2832	2845	2933	2127	2279	2069	2818	2441	2336				Cnep1r1	0.221391	1.07674	2.3648e-05	860	922	805	1393	1225	1175	1969	2047	2087	1567	1660	1668	2022	2113	1212	1578	1187	1163
Ccdc80	5.81145	0.673523	5.74002e-08	522	377	593	369	955	1185	1	1	0	1	2	0	439	197	15	7	7	11				1810046K07Rik	0.814916	5.47593	2.39714e-05	11	10	27	6	2	4	160	173	127	63	73	53	17	38	63	0	1	0
Efemp2	3.41415	0.491434	5.85038e-08	1195	1039	1348	538	692	873	120	121	60	116	97	129	128	71	135	36	45	90				Aspdh	0.923719	6.13436	2.39864e-05	0	0	0	0	0	0	24	17	14	42	46	44	0	0	0	0	0	0
Aldh16a1	-1.54499	0.250677	5.88713e-08	1446	1477	1562	1460	1650	1495	3804	4227	3520	4761	4857	5415	2632	2941	2912	3649	3405	3462				Rassf5	0.492463	2.70063	2.40825e-05	195	169	246	173	151	153	615	651	601	149	214	244	257	181	126	97	46	54
Atp8a1	1.38167	0.232493	5.88713e-08	3798	3540	3106	1910	2696	3115	2928	3090	2726	1848	1957	2275	1204	1169	2225	4862	4946	5374				Fads1	0.364771	2.00158	2.41043e-05	2389	3026	3742	2916	3180	3781	12353	12283	7809	4507	4920	5773	2513	4511	4723	1634	1545	1110
Lbp	5.37085	0.672918	5.93202e-08	887	895	1924	333	493	955	51	45	46	2	3	5	44	50	70	4	7	3				Cyp2f2	0.844981	-4.78275	2.44003e-05	4	2	1	3	0	2	6	0	0	0	0	0	0	3	8	42	54	24
Wdr62	-1.64236	0.275522	5.93202e-08	182	281	292	351	333	280	404	410	462	349	422	456	875	1110	367	765	632	663				Xylb	0.225887	1.12732	2.55544e-05	403	372	272	302	405	309	1917	1838	1789	1106	1140	1397	661	926	732	665	662	636
Tead2	2.32045	0.35769	5.94898e-08	1658	1465	1509	1652	3076	2323	345	426	376	206	256	378	493	553	430	463	458	430				Cadps2	0.401224	-1.99449	2.58038e-05	361	546	247	310	259	245	920	985	1176	412	386	373	337	468	559	2420	1855	1518
Sytl4	1.58298	0.259274	6.14614e-08	394	419	340	346	355	467	210	206	213	119	149	154	122	168	160	95	82	97				Abca1	0.72542	5.08395	2.58804e-05	530	419	142	132	428	377	119	101	93	766	480	558	23	39	168	4	6	4
Recql4	-1.73469	0.289403	6.2123e-08	174	240	254	254	281	210	506	465	393	338	354	422	578	723	246	473	349	397				Gprc5a	0.289978	-1.52713	2.58804e-05	8733	8866	6283	9864	12149	9938	2356	2381	1680	2589	3463	2647	9981	5206	4118	18084	13059	10177
Ldb3	-4.51806	0.569572	6.27159e-08	52	43	29	16	13	17	725	684	521	1653	1629	1497	738	944	1337	182	185	128				Slc8a1	0.577864	-3.09438	2.58804e-05	13	12	32	9	10	20	37	31	41	11	9	14	3	9	11	79	97	264
Fbf1	1.58929	0.259845	6.33405e-08	2838	2567	2460	1967	2463	2580	1264	1224	1155	654	768	803	995	1200	966	1310	1167	1178				Pdgfra	0.603558	-3.38418	2.7216e-05	26	19	15	9	17	6	2	2	4	1	4	1	3	4	6	17	23	33
Gm44985	3.21329	0.518791	6.42061e-08	1363	1684	962	769	668	698	473	432	458	100	114	172	113	249	367	237	215	105				Creb3l3	0.680084	4.02551	2.72967e-05	4	3	0	1	5	2	1716	1979	1364	10267	10475	9838	162	74	177	407	179	239
Nalcn	6.402	0.592948	6.54275e-08	223	252	310	110	90	256	3	7	6	0	0	0	0	0	0	0	0	0				Pld2	0.240138	1.18593	2.88247e-05	2180	2335	1681	1489	1696	1543	1609	1701	1458	1423	1548	1512	1990	1702	1363	1258	656	656
Abo	5.30355	0.666009	6.67902e-08	139	165	65	208	124	137	0	0	0	1	2	2	28	14	7	793	663	653				Slc2a7	0.912019	7.02522	2.88247e-05	1	1	2	0	1	0	50	43	30	385	258	333	0	0	0	0	0	1
Mapk15	4.13444	0.59783	6.67902e-08	233	261	144	72	71	138	23	24	21	2	8	8	7	22	22	76	56	25				Gas1	0.896341	5.34422	2.9467e-05	31	28	104	276	304	86	39	34	64	12	20	12	2	4	1	0	0	0
Alox12	6.66716	0.713804	6.73366e-08	386	350	281	238	227	237	2	1	1	0	0	0	13	9	2	114	51	18				Mfsd2a	0.570364	2.8243	2.98314e-05	429	471	748	1239	1915	1630	661	766	530	2737	2856	2918	892	1035	335	515	437	471
Arg2	-4.19315	0.508089	6.80558e-08	92	79	61	42	26	42	2295	2579	2069	3649	3453	3940	9	13	39	87	135	127				Rnf130	0.558789	-2.57391	2.98314e-05	1528	1665	1571	1224	1585	1403	828	1153	1104	134	160	138	146	204	507	2201	2248	1702
Ccdc102a	4.19818	0.556986	6.80657e-08	224	186	143	79	138	200	5	6	11	1	9	8	30	16	19	22	7	12				Rtl10	0.29369	1.41853	3.00177e-05	61	71	64	65	81	83	147	116	149	92	85	131	160	197	74	74	69	66
1700066B19Rik	2.34223	0.368383	7.14889e-08	1126	1146	1136	2060	1800	1453	349	459	321	203	293	262	544	485	631	1223	1056	969				CT486005.1	0.71966	-4.19542	3.03322e-05	415	614	69	89	55	54	6	2	5	7	5	1	48	33	29	170	124	132
Paqr9	-4.11091	0.578105	7.20612e-08	6	3	3	7	14	11	27	25	15	70	78	72	5	1	0	2	5	3				Prrx1	0.921463	6.85917	3.04513e-05	0	0	0	0	0	0	68	107	55	434	337	389	1	2	8	1	0	0
Stx19	5.42345	0.631845	7.3718e-08	188	205	90	220	280	199	1	0	10	1	3	1	7	8	6	10	14	5				Nfe2	0.556284	3.52662	3.13473e-05	39	44	23	33	16	12	174	196	62	165	150	150	9	3	11	6	9	12
Col14a1	6.60591	0.684784	7.5108e-08	635	261	2504	225	468	694	5	2	5	6	6	1	6	16	8	2	1	4				Npl	0.64829	4.041	3.13837e-05	16	19	8	12	12	13	85	100	64	433	375	257	13	15	27	8	13	9
Snx32	3.24154	0.464472	7.85182e-08	167	136	126	111	115	95	23	10	13	14	12	10	10	13	9	36	27	19				Paqr7	0.458659	2.35775	3.1822e-05	1475	1302	1102	590	1090	1212	182	235	153	427	500	414	307	143	92	117	115	99
Nup62	-1.01128	0.170176	7.85226e-08	1328	1410	1365	1466	1661	1446	2694	2480	2236	1765	2077	2395	2592	3011	1835	2436	2252	2081				Engase	0.265346	1.33033	3.19923e-05	1528	1798	2437	2101	1511	2162	3139	3251	3241	1949	2315	2854	1649	2363	1771	1100	1165	1093
Tgfb1	1.46368	0.240913	8.25116e-08	854	826	769	702	899	856	315	341	222	299	297	302	560	428	524	1088	801	726				Anxa7	0.203402	-1.01637	3.20915e-05	9131	9450	8027	9091	10941	8698	4223	4496	3752	5534	5930	5747	10088	8563	5955	19183	14793	13640
Dzip1	4.03629	0.526714	8.40247e-08	251	203	184	132	227	299	8	12	12	9	3	9	17	17	10	17	6	2				Neurod2	0.943213	5.24804	3.20915e-05	0	0	0	0	0	0	37	35	34	17	12	27	4	14	6	0	0	0
Alppl2	-6.05067	0.79611	8.53379e-08	0	0	1	0	0	0	161	214	168	181	210	179	5	9	69	15	9	25				Pygb	0.215265	-1.02823	3.20915e-05	9074	10144	7687	5268	5446	6593	3529	3781	3321	2456	2697	3022	2596	3263	3400	5798	5075	4838
Gemin8	2.22066	0.360259	8.53379e-08	259	242	222	189	171	252	99	116	93	40	52	55	90	87	114	92	83	62				Leap2	1.00664	7.99041	3.23546e-05	0	0	0	0	0	1	88	117	120	1338	1125	1263	0	1	1	0	0	0
Klf15	3.68992	0.570172	8.57698e-08	161	140	120	66	42	49	50	97	59	16	8	25	2	5	27	0	0	0				Eda2r	0.417816	-2.17892	3.28479e-05	1783	1461	2647	1707	2127	2558	133	202	324	88	110	156	894	624	589	1196	1114	619
Prlr	-6.0858	0.646918	8.70331e-08	5	1	2	0	1	0	2198	2382	2375	2117	1702	1727	0	18	267	1	2	6				Ugt1a9	0.942802	6.66786	3.28479e-05	2	0	0	0	0	0	42	62	55	115	116	140	1	0	3	0	0	0
Lyst	1.45189	0.243102	8.87121e-08	1164	1095	984	948	860	953	543	645	756	411	510	509	484	410	665	900	594	584				Gnai1	0.573783	-3.01182	3.28764e-05	925	900	847	1395	1356	1155	18	14	35	5	9	2	18	5	22	189	146	72
Fundc1	1.17145	0.195806	8.93289e-08	1667	1566	1470	1634	1463	1641	838	853	881	633	657	681	903	789	837	1645	1374	1024				Ypel2	0.276647	1.41966	3.29768e-05	464	452	442	223	422	397	828	770	750	706	793	822	307	251	507	298	206	178
Btbd17	5.0825	0.565041	8.94443e-08	371	381	476	274	399	572	3	9	5	9	1	11	7	11	3	4	2	9				Prokr1	0.394258	2.05093	3.35362e-05	72	86	84	81	60	97	106	124	102	50	51	58	81	93	80	16	19	17
Snrk	-1.13937	0.191746	9.01332e-08	745	686	681	801	811	628	1116	1180	1065	1298	1277	1289	1791	1518	1257	2074	1608	1625				BC049987	0.673897	4.55077	3.43983e-05	13	24	162	79	32	39	200	267	172	278	191	348	5	5	9	6	12	3
Abcg1	4.53528	0.601675	9.04877e-08	253	215	182	128	392	364	15	14	25	3	3	7	26	34	32	3	6	13				Gata4	0.746329	5.8301	3.4458e-05	4458	4919	3058	3533	3901	3359	7569	7332	7376	6202	6899	7752	16	361	697	1	114	16
9030622O22Rik	4.04412	0.611106	9.08458e-08	312	416	186	80	172	156	70	58	53	13	7	18	6	14	39	17	15	1				Mill2	0.556821	-2.68147	3.44987e-05	152	155	134	91	50	78	73	80	82	18	17	12	34	16	74	260	173	132
Klhdc7a	4.01312	0.537068	9.35685e-08	4214	3965	3890	2642	3519	3969	168	268	213	57	71	60	1022	767	321	1154	982	722				Prdm16	0.410233	2.18724	3.44987e-05	2192	2261	2295	1703	2056	2138	3383	3452	3605	1582	1657	2081	1085	895	846	761	216	732
Sptbn2	3.75143	0.549805	9.46189e-08	2004	2071	2185	847	1527	1527	284	292	245	65	80	88	322	450	405	205	246	74				Tubb2a-ps2	0.408104	1.89767	3.47956e-05	108	109	105	107	235	109	79	84	88	227	178	196	312	209	65	119	77	102
Sbspon	5.58095	0.65011	9.47912e-08	341	196	523	280	287	608	10	11	6	0	2	0	22	32	15	2	0	1				Gatm	0.371945	-1.9131	3.51149e-05	252	289	379	432	374	542	78	88	57	37	65	57	71	53	63	242	339	258
Fzd8	2.05749	0.329782	9.87702e-08	198	186	222	210	301	273	47	65	62	55	55	58	56	53	64	191	208	205				Socs2	0.296681	1.55897	3.5147e-05	1077	975	1054	839	1139	1080	1594	1521	1875	1030	1067	1257	986	996	2072	247	207	446
Erich4	-7.20079	0.839944	9.89444e-08	0	0	0	0	0	0	189	260	186	423	399	391	4	6	62	6	14	16				Atp8b5	0.495648	-2.80252	3.52221e-05	22	19	22	21	25	26	10	10	24	9	8	24	31	8	25	138	139	74
Prr36	3.17239	0.517071	9.95895e-08	105	147	134	46	26	59	40	54	40	23	17	30	7	12	35	32	41	33				Cwh43	0.483134	-2.89774	3.53064e-05	3629	3922	1887	5145	6775	5329	97	146	202	430	491	359	2933	1687	917	6718	4479	4996
Cuedc1	2.72686	0.434691	9.96708e-08	1154	1125	881	758	1089	1101	367	437	401	179	130	162	378	381	613	211	177	93				Kctd1	0.340425	-1.66643	3.53275e-05	245	249	314	148	261	263	35	39	57	23	23	36	40	41	46	119	112	85
Pax9	9.25285	0.782098	1.01706e-07	897	840	1636	516	598	1478	0	0	0	0	0	1	2	4	0	2	1	7				Pcdh8	0.838943	5.5113	3.59172e-05	0	0	0	0	1	1	81	106	183	75	73	96	2	5	22	0	0	1
Eps8l3	-1.52229	0.249662	1.02786e-07	5168	5208	4429	4108	3381	3378	13081	13227	12924	13598	15248	15282	13055	11677	13101	19241	16289	15558				Gata5os	0.891891	4.85246	3.6102e-05	22	37	39	6	12	8	24	30	27	12	20	26	11	12	7	0	0	0
Arl14	1.91869	0.311142	1.03729e-07	3950	3688	3372	2036	2159	2447	774	1015	889	796	772	753	814	749	652	1398	1085	1177				B3gnt7	0.448154	2.46508	3.67185e-05	204	234	91	75	122	147	1718	1633	1210	1104	1103	1249	430	434	614	322	171	63
Tgfbi	-6.8715	0.745255	1.04517e-07	0	0	0	0	1	2	1576	1880	2249	631	554	588	42	78	753	26	57	212				Pou6f1	0.429673	-2.10389	3.79447e-05	566	518	519	253	336	443	105	154	148	33	52	61	189	142	204	352	320	296
Tmem167b	1.06631	0.179458	1.04954e-07	3387	3174	2715	2485	3007	2823	1319	1376	1552	1431	1541	1572	1499	1342	1448	2175	2025	1734				H6pd	0.218403	1.05525	3.82472e-05	5056	4443	4438	4015	5203	5072	1627	1747	1436	1764	2232	2241	2933	3001	2024	1123	1257	1300
Nectin4	2.84924	0.427996	1.08058e-07	998	995	763	612	840	781	108	137	109	53	59	57	837	746	375	150	187	97				Ddhd2	0.265097	1.33252	3.91822e-05	638	583	617	578	420	456	1683	1830	2255	2163	2340	2572	610	707	1065	799	712	593
Defa2	-8.42269	0.85141	1.09288e-07	0	0	0	0	0	0	731	1092	1102	2547	1883	2238	722	1758	15107	0	5	0				Nt5dc2	0.265818	1.2841	4.02554e-05	498	455	735	701	739	565	722	663	523	595	539	768	504	667	390	459	354	286
Limd2	2.96264	0.443658	1.098e-07	942	898	826	803	1539	1284	145	177	218	81	88	74	222	198	183	53	37	51				Gcat	0.429557	2.09246	4.0875e-05	142	135	158	268	211	151	383	436	299	850	829	873	269	418	186	258	232	214
Lmo4	1.67045	0.274361	1.098e-07	2896	3281	2514	2408	2739	3682	1324	1198	1007	700	806	842	1047	987	907	799	660	577				Slc25a20	0.371071	-1.86463	4.1452e-05	782	818	659	702	772	682	1036	1334	911	1653	1999	1963	1070	879	2080	4793	4694	4593
Asph	1.5751	0.26543	1.09988e-07	8514	8568	9102	5658	4976	5564	4581	4745	4455	3027	3316	3385	3353	3693	4571	3193	2965	2795				Akap5	0.603414	2.68694	4.21071e-05	492	325	816	379	1164	1756	10	11	11	6	12	9	452	248	27	6	7	2
Ttc8	4.07566	0.556547	1.12276e-07	491	501	294	273	404	443	39	33	46	15	9	12	30	11	19	27	64	35				Tgoln1	0.304161	-1.50759	4.28471e-05	11557	12812	9377	9332	8372	8259	5304	5721	5804	8135	9175	8492	6111	5408	6653	23391	21018	21183
Grb14	4.31116	0.584657	1.14137e-07	437	405	306	306	582	388	55	57	33	11	5	21	17	9	24	1	5	5				Mgst1	0.38443	2.08183	4.30637e-05	7110	6945	3674	3636	2602	2811	4700	5525	4893	5824	6389	6736	2399	3277	3899	766	1116	1165
Gucd1	-1.90104	0.300482	1.14721e-07	629	672	466	486	669	602	3867	3999	3360	3968	4370	4190	1764	1513	3534	3026	3084	3396				Spcs2	0.211667	1.01763	4.34126e-05	3530	3305	4241	4700	4293	4369	3294	3314	2867	3702	3738	3835	3078	2819	2627	2419	2128	2005
Mgam	-5.21405	0.616511	1.16148e-07	248	219	1409	735	638	593	22980	26160	26190	69027	65797	65850	18697	23820	51475	17765	14658	16713				AC140346.1	0.941854	5.20913	4.41739e-05	0	0	0	0	0	0	18	36	15	41	25	25	8	7	15	0	0	0
Gldc	5.29661	0.598034	1.18231e-07	613	961	343	1390	1499	914	4	14	7	22	21	12	7	15	12	3	1	3				Cyp2d12	0.753491	-4.0847	4.42523e-05	1	3	0	0	1	0	6	8	2	26	25	10	1	1	38	215	193	159
Apoa1	-10.272	0.795153	1.19089e-07	1	5	2	0	1	2	8737	11490	9037	75943	68886	56587	77	538	3824	0	12	3				Dirc2	0.289471	-1.40707	4.49442e-05	1637	1498	1857	1207	1330	1776	590	739	683	921	888	850	939	776	1212	2010	2022	1971
Defa27	-6.6727	0.847295	1.20114e-07	0	0	0	0	0	0	73	85	160	228	169	187	20	42	170	0	0	0				Csad	0.233637	-1.10484	4.61501e-05	931	879	836	549	738	790	798	841	697	691	655	878	457	541	790	1701	1358	866
Fgf9	4.05121	0.600919	1.20931e-07	363	378	318	136	211	310	52	76	83	17	12	3	0	1	3	4	34	13				Ly6a	0.529137	-3.33205	4.71244e-05	15688	12587	15234	33919	42135	40157	173	359	262	860	1289	788	16972	10830	4260	21187	17548	18148
Enpep	-9.69717	0.857909	1.21814e-07	0	0	0	0	0	0	970	942	1235	10756	10657	9343	98	388	2765	20	17	8				Mcpt2	0.918247	5.22761	4.71791e-05	105	121	185	34	150	105	4	22	3	529	396	254	4	15	1	1	2	2
Spred3	2.72851	0.412075	1.24583e-07	1033	906	655	474	744	1145	83	92	72	83	107	85	398	182	211	414	272	256				Sh3tc2	0.582131	-3.40339	4.7471e-05	45	37	52	16	7	9	16	36	23	58	51	40	81	74	69	528	543	436
Adh4	-7.98726	0.832019	1.26115e-07	0	0	0	0	0	0	1117	1149	786	1257	1109	1321	1	4	119	0	0	0				Ppp1r3b	0.41904	-1.99755	4.9185e-05	1744	1837	2553	1429	1125	1341	1316	1319	811	1663	1576	1666	373	251	1256	3365	3923	3172
Ldlrad3	2.43715	0.390789	1.3258e-07	371	273	454	274	612	432	91	68	112	78	74	65	126	149	167	1991	1845	1375				Pea15a	0.248772	-1.23466	4.97841e-05	2821	3384	3114	2328	3882	3632	390	356	360	269	302	240	1232	935	452	1573	1216	1184
Gstm2	2.5861	0.420068	1.33333e-07	1790	2013	1449	904	767	840	627	514	432	211	315	371	121	145	188	222	226	154				Kctd14	0.447865	2.75297	5.01031e-05	5719	5696	8505	8198	4466	4822	2344	2887	1121	735	595	996	212	289	791	102	102	96
Dna2	-2.38263	0.391928	1.35189e-07	219	291	459	492	627	508	1645	1566	1648	1157	1236	1456	1268	2006	842	976	841	783				Gm6977	0.349583	1.77815	5.04652e-05	1392	1463	1163	1320	1104	1005	3035	4286	4350	6572	6213	6929	1109	1034	1567	1532	1446	1340
Mpp3	-2.45354	0.377909	1.38365e-07	72	82	113	80	62	63	992	895	695	456	457	570	381	592	495	545	622	695				Thpo	0.709371	-3.61939	5.04652e-05	46	66	7	42	12	31	13	11	4	1	7	2	1	11	15	173	61	36
Mex3c	-1.37156	0.234141	1.40345e-07	2148	2107	2237	2970	3166	2590	3398	3521	3689	4147	4762	4617	5624	4855	3461	5090	4251	4381				Angpt2	0.72884	4.99339	5.05999e-05	15	4	2	17	3	2	787	847	725	95	117	157	52	123	231	5	5	2
Napepld	1.38612	0.2343	1.41221e-07	1718	1768	1988	1632	1508	1771	963	968	961	678	672	757	513	678	616	1244	1046	733				Fam213a	0.488076	2.56605	5.17576e-05	19168	16666	11288	10956	12318	16925	3541	4716	4321	13755	11139	11216	3954	2338	2338	2527	1930	1343
Lepr	7.46731	0.84772	1.42066e-07	256	228	315	38	46	27	1	0	0	0	0	0	4	2	5	0	5	0				Sorl1	0.280195	-1.29529	5.21284e-05	5953	6466	7079	4245	4075	4431	6447	7108	6664	3017	3434	3880	3914	3823	7014	8578	7012	7753
Cmtm8	4.65234	0.610219	1.46706e-07	1103	997	1140	885	941	1149	91	116	77	17	10	14	5	8	7	8	22	21				Gm9847	0.389882	1.99078	5.4511e-05	59	46	55	55	61	66	64	98	111	68	52	68	65	57	104	9	10	23
Trpv4	5.6627	0.591046	1.50203e-07	335	278	462	240	497	400	2	4	3	4	1	3	5	10	1	3	3	6				Smad6	0.344075	-1.46078	5.59779e-05	406	475	502	239	338	443	48	66	60	34	24	39	9	17	54	40	52	63
Trmt61a	-1.43324	0.243284	1.51311e-07	228	207	174	208	278	227	441	433	495	431	435	512	416	599	330	336	305	354				Golga7b	0.512935	2.49468	5.63773e-05	0	0	0	0	1	1	48	73	73	31	33	53	55	51	27	6	14	9
Gm47451	3.20297	0.649794	1.52729e-07	42	25	27	8	1	5	16	14	21	5	3	0	0	0	17	0	2	4				Cyp26b1	0.692297	-3.61415	5.64222e-05	144	148	354	443	345	567	4	15	2	7	12	10	88	51	414	17	151	152
Itm2c	2.03291	0.335701	1.55409e-07	6728	6060	5936	4232	5228	6494	2413	2601	2726	1156	1381	1461	2154	1824	2234	2062	1539	1600				Tnnt2	0.38874	-2.2628	5.64848e-05	144	132	60	161	101	89	34	42	48	38	40	49	1384	688	138	989	581	432
Prss22	4.6437	0.550198	1.56359e-07	2489	1588	1866	1826	3424	3101	7	8	6	40	43	24	190	153	38	320	266	370				Pdgfc	0.444169	-2.39151	5.86791e-05	762	648	939	434	550	574	30	60	24	68	53	59	237	138	96	313	382	557
Gkn1	10.1465	0.812914	1.60284e-07	8199	18671	2484	924	2029	2887	0	1	0	0	0	4	1	3	1	1	0	0				Pparg	0.388501	-1.96336	5.91616e-05	3489	3671	2391	3161	2120	1767	1224	1110	862	1766	1832	1687	2010	1386	2002	6060	6084	6336
Hivep3	4.56342	0.63384	1.64572e-07	359	378	153	53	63	82	20	15	13	8	4	5	21	7	27	78	133	134				Lipt2	0.220309	1.0675	5.99452e-05	675	596	588	574	865	767	279	310	273	211	246	269	160	228	223	136	124	110
Vwce	-6.27466	0.680155	1.6838e-07	3	4	7	3	6	5	460	535	397	1496	1602	1868	3	34	46	0	0	1				Map6	0.436258	-2.67512	6.04539e-05	431	368	533	1007	1289	1074	11	20	21	44	85	45	1855	1111	188	1398	994	902
Bmp2k	-1.62984	0.269306	1.70129e-07	323	350	327	396	402	302	1245	1222	1180	1343	1339	1530	739	813	999	1168	1050	1372				1700010I14Rik	0.704427	-2.75077	6.06051e-05	36	35	27	1	8	5	54	72	27	7	13	5	4	26	45	99	105	163
Hist1h4i	-2.14722	0.36541	1.70492e-07	21	24	29	49	59	39	60	57	54	68	58	67	93	89	30	117	92	99				Glul	0.503613	-2.23304	6.08007e-05	16779	19050	10439	6674	6619	8956	5158	5409	5874	1120	1300	1488	1391	1547	3019	12225	10003	6101
Fam98c	-1.12485	0.189647	1.71352e-07	761	824	730	675	728	718	2016	2252	1972	2033	2335	2509	1373	1517	1995	2928	2846	2474				Lpar2	0.278605	1.32033	6.09269e-05	726	816	688	906	1275	950	294	343	328	470	494	495	512	439	324	292	244	239
Plxnd1	2.39922	0.381916	1.76088e-07	887	743	738	595	1113	901	176	265	164	164	167	162	125	85	129	40	51	81				Dtx4	0.288296	1.38364	6.09894e-05	1590	1776	1408	1761	2244	2143	2576	2877	3229	1411	1847	1983	2476	2947	1839	1428	1010	871
Shank2	3.0007	0.487669	1.77987e-07	2278	2188	2396	1549	2046	1877	966	1035	972	216	259	334	119	140	273	122	128	86				Hcn2	0.291201	-1.3688	6.09894e-05	759	818	991	915	734	900	333	416	311	391	391	401	284	198	500	743	801	775
Gaa	1.55074	0.26492	1.80363e-07	7791	7484	7582	4589	4631	4832	3843	4141	3545	2426	2749	3114	2408	2580	3082	3501	3005	2892				Map3k13	0.213556	1.02114	6.17374e-05	396	463	549	438	431	456	1198	1142	1287	1343	1277	1425	674	745	901	722	616	494
Tbc1d16	2.22829	0.37656	1.81213e-07	2425	2329	2463	1516	1414	1441	872	1058	1182	950	810	997	335	302	767	195	477	421				Klhl13	0.516501	2.70679	6.24849e-05	135	151	99	186	145	114	345	299	539	156	173	199	56	194	53	60	54	24
Ceacam20	-8.05905	0.78345	1.81553e-07	0	0	2	2	0	0	353	310	263	2903	2490	2426	354	241	1054	3278	3317	3135				Zdhhc14	0.272058	-1.33054	6.24849e-05	62	48	71	35	50	55	184	192	218	198	213	202	348	354	379	784	460	386
Peg3	4.12374	0.621903	1.81911e-07	1616	1348	1665	678	671	728	250	317	274	34	26	39	19	32	68	6	5	2				Pdss1	0.279386	1.33686	6.33523e-05	140	182	198	279	255	236	3027	2605	2307	2012	2178	2687	872	1369	1252	1053	907	945
3930402G23Rik	-3.20589	0.463336	1.82914e-07	24	19	21	41	16	16	670	662	548	253	326	332	254	174	455	355	246	248				Tymp	0.708281	4.23854	6.42282e-05	5	2	3	2	0	0	45	48	23	62	44	45	3	5	3	1	2	2
Nectin3	-1.63121	0.267001	1.83041e-07	1413	1462	1206	1758	1064	1070	6271	6991	6793	6066	6084	6898	3606	4691	6113	4915	5288	5824				H60c	0.860875	-5.80972	6.44857e-05	85	60	6	67	46	107	0	0	0	0	0	0	20	8	2	128	72	30
Gpr17	-5.46506	0.833542	1.88052e-07	0	0	0	0	0	0	11	20	21	35	22	42	22	16	27	15	17	16				Nxpe4	0.80088	-6.17931	6.44857e-05	54	32	41	31	21	51	0	0	0	1	0	0	0	0	0	157	65	23
Grtp1	-1.20814	0.203221	1.88052e-07	610	715	479	482	486	391	1929	2046	1874	1407	1605	1623	1510	1593	1889	2091	1729	1533				Cldn14	0.753495	-4.10173	6.57249e-05	0	0	0	0	0	0	2	2	2	3	0	2	1	3	17	35	33	8
Rimbp2	-5.11177	0.67822	1.91377e-07	3	0	0	0	2	0	238	204	380	90	85	118	46	97	227	30	40	22				Fblim1	0.276292	1.36587	6.57249e-05	4082	4095	3342	2199	3771	3432	4197	4015	3955	3302	3689	3827	2538	2690	3631	1960	1213	768
Nxf7	-5.57655	0.807118	1.93155e-07	0	0	0	2	0	0	26	72	15	45	51	41	94	230	107	0	0	0				Hexa	0.22368	-1.03319	6.6626e-05	4681	4717	4036	2710	2683	3284	4580	5299	5228	4492	5033	5226	3813	3416	6397	7015	7639	7324
Qsox1	2.26854	0.36493	1.96071e-07	38099	38022	34748	20141	21272	26271	5798	6392	5409	7285	7485	7630	7072	6460	7301	4033	2809	2078				Slco4c1	0.726959	-5.14066	6.85656e-05	27	32	83	62	34	47	2	0	0	0	0	1	7	3	2	102	64	33
Bpifb1	11.4753	0.842789	1.96796e-07	8309	9090	7794	1317	1792	12910	0	0	0	0	0	0	2	2	0	0	3	1				Oas1f	0.730066	3.96591	7.06215e-05	0	0	1	2	1	1	73	90	50	13	36	27	66	110	84	3	0	2
Eri3	1.35319	0.232959	1.97065e-07	2410	2256	1886	1503	1652	1890	1404	1356	1403	837	894	962	975	976	1181	1261	970	1021				Pck2	0.257151	1.21875	7.06451e-05	2199	2112	2557	2562	1755	1617	4758	4608	4211	2922	3094	3793	5332	4818	3645	1988	1702	2098
Mov10	-1.32199	0.223783	1.97379e-07	499	448	338	284	410	426	1217	1181	1187	941	1198	1124	604	534	604	434	307	325				Gm35696	0.829131	5.15074	7.07894e-05	20	29	23	48	36	48	16	23	33	58	46	42	3	2	7	0	1	0
Homer3	1.6142	0.264137	2.01026e-07	1475	1294	1100	1111	1911	1646	254	285	309	198	281	270	941	638	418	567	483	405				Mptx1	0.689377	-2.42867	7.23945e-05	0	0	0	0	0	0	1680	1254	2449	166	141	226	5	49	589	1377	1727	377
Hs6st2	5.96178	0.589788	2.01205e-07	833	426	1570	308	886	725	8	12	17	8	10	6	2	2	2	0	2	0				Sec16b	0.254025	1.19407	7.32872e-05	1233	1342	1695	1229	1237	1282	1271	1264	1097	1517	1768	1793	1050	1172	816	921	864	763
Scn1b	6.97815	0.740133	2.06098e-07	495	380	256	164	344	392	0	0	0	2	2	0	24	5	4	1	0	0				Tnni1	0.589246	-3.85573	7.51066e-05	9	1	2	6	6	8	6	18	2	16	7	8	11	7	8	292	227	108
Mfge8	2.30583	0.370445	2.06199e-07	10422	11130	10400	11697	13067	14155	3267	3655	3420	1679	1806	1680	1640	1653	1505	950	750	506				Acta1	0.316424	-1.43219	7.51981e-05	3	11	16	17	4	5	992	1185	1472	811	948	1032	204	402	1622	855	1244	991
Tle2	3.1845	0.502017	2.06202e-07	1331	1412	711	288	409	609	255	200	195	128	130	105	93	71	145	115	90	115				Pnkd	0.271469	1.35969	7.56179e-05	1733	1816	1157	770	920	1025	794	892	812	585	625	749	230	254	328	232	233	173
Tkfc	-4.45137	0.56967	2.08242e-07	921	842	987	796	892	899	17462	18230	18080	59537	56899	61398	2800	3526	9491	1862	1503	1026				Sprr2h	0.907314	-5.50163	7.68365e-05	0	2	0	0	0	0	0	0	0	0	0	0	6	4	6	39	20	15
Muc3a	-5.38342	0.626984	2.08383e-07	3	5	6	13	10	1	2252	1600	1050	379	341	411	405	506	1170	497	492	616				Dnah7b	0.499646	-2.60528	7.7231e-05	210	206	128	72	79	109	5	8	10	5	7	9	217	137	73	80	63	76
P3h3	4.05903	0.615288	2.08819e-07	220	140	94	37	30	74	16	34	24	6	5	7	9	8	28	1	6	5				Atrnl1	0.23492	-1.12505	7.74546e-05	2743	2863	3592	3428	4021	3607	1480	1630	1681	2036	2267	2023	2834	2923	2438	6033	5090	5299
Mgmt	2.38802	0.389692	2.08916e-07	859	670	572	361	483	609	159	213	229	120	103	100	184	148	172	215	197	176				Ttyh2	0.29924	1.424	7.75553e-05	1030	1124	885	996	1364	1232	1752	1814	1663	2717	2827	2857	1444	1549	1460	1152	977	1007
Dtwd2	-2.0375	0.345879	2.11362e-07	29	48	32	58	65	39	104	111	131	79	96	119	141	151	65	94	96	93				Kdelr2	0.253324	1.19308	7.80651e-05	5311	5382	6201	8061	7829	7022	5197	5365	5057	6751	6723	6950	4983	5224	4735	3818	3372	2964
Angptl2	8.15345	0.706232	2.23391e-07	1403	953	1814	1411	2437	2133	0	0	0	0	4	0	12	11	2	74	18	10				Trib3	0.535213	2.48031	8.21785e-05	392	382	400	694	540	291	271	280	213	1057	1178	1123	1564	698	299	262	210	314
Glns-ps1	3.10953	0.517427	2.28316e-07	2182	2490	1451	871	845	1127	629	644	711	159	182	226	178	204	408	1596	1235	761				Gdpd5	0.218958	1.03547	8.45328e-05	1641	1473	1310	1035	1833	1787	749	970	691	714	711	829	422	435	412	457	420	366
Acnat2	3.27771	0.498505	2.2938e-07	209	242	165	82	98	119	35	18	22	27	26	38	10	7	19	32	29	34				Prss12	0.413214	2.0366	8.50043e-05	927	738	923	781	1052	1875	210	180	183	230	203	342	102	51	47	148	80	55
Gm43845	7.69065	0.761715	2.30999e-07	129	77	76	49	73	92	0	0	0	0	0	0	0	0	0	0	0	0				Gm17189	0.560708	-3.1149	8.64981e-05	193	166	201	224	177	140	5	1	0	2	2	5	82	19	16	74	68	31
Armcx6	6.93958	0.763402	2.32407e-07	82	82	52	61	34	52	0	1	1	0	0	0	0	0	0	0	0	0				Wipf3	0.542263	2.93093	8.71705e-05	27	21	7	7	25	16	167	191	171	319	302	341	241	268	377	8	34	33
Nenf	1.42251	0.24526	2.33687e-07	825	686	688	616	706	723	301	422	424	335	387	456	454	382	667	614	633	494				Cd274	0.410735	-1.98294	8.78316e-05	38	40	37	44	42	31	183	205	123	69	73	73	135	65	201	370	315	335
Dip2c	1.2214	0.211268	2.4117e-07	1228	1178	1595	1138	1328	1332	783	833	876	605	558	686	765	811	897	726	692	672				Arhgap9	0.519792	2.6676	8.85915e-05	34	20	17	33	37	10	142	131	74	67	130	59	111	202	125	8	18	18
Tnfrsf21	2.53326	0.404594	2.42122e-07	5912	6898	3323	2724	3081	2753	797	916	688	580	722	587	1855	1493	1246	3414	2996	2908				Ttc9	0.407751	-2.12511	8.8852e-05	4632	4134	4071	3774	5876	5718	11	30	20	57	65	39	368	288	138	474	303	344
Foxa1	1.28225	0.2175	2.43141e-07	4597	5484	4648	3951	5263	5121	1677	1694	1820	1134	1380	1409	4990	4816	2898	4197	4019	4155				Gm32742	0.527581	3.17778	9.02645e-05	303	322	258	224	86	146	3778	3900	2879	1114	869	1139	274	319	604	187	131	45
Hectd2	5.35887	0.565899	2.46078e-07	172	119	132	93	99	102	2	9	3	6	1	3	0	0	0	0	1	0				C130021I20Rik	0.939639	4.63492	9.03742e-05	2	2	1	0	0	0	17	27	19	7	7	17	17	26	8	0	0	0
Atp6v0e2	-3.12989	0.480121	2.46244e-07	17	22	8	8	31	12	147	122	89	191	161	174	430	413	417	361	495	348				Parm1	0.397441	-1.93094	9.03742e-05	9199	9667	8226	5415	2974	3817	3319	3490	3049	2612	3514	3045	4330	2574	3843	13324	12444	9683
Fzd4	2.54603	0.408964	2.46453e-07	1242	1189	1799	920	748	1052	232	281	246	315	284	382	49	45	81	79	67	76				Cln5	0.230774	-1.0809	9.17535e-05	951	1000	835	969	1074	939	502	536	576	690	728	683	909	749	933	1652	1499	1313
Gsap	3.61387	0.507782	2.46453e-07	2567	2159	2248	1205	1154	1691	37	61	62	94	164	92	789	558	388	1483	1301	1651				Lamc2	0.248973	-1.21468	9.44502e-05	19374	17362	19906	16164	23927	23379	2280	2608	2219	3275	4054	2766	16330	9682	5556	16655	12651	12119
4933412E12Rik	2.62282	0.426253	2.5387e-07	135	122	78	57	96	82	26	30	25	23	23	27	28	15	38	18	31	28				Platr26	0.699262	-4.04559	9.51181e-05	0	0	0	0	0	0	1	4	3	1	3	1	0	0	6	33	30	18
Plcd3	1.75521	0.287408	2.55302e-07	2130	1895	1993	1609	1779	1894	247	377	236	364	389	312	1078	733	484	2396	1801	1741				Pacsin3	0.247808	-1.14493	9.5282e-05	1934	1929	1570	1308	1721	1601	180	226	151	119	130	134	202	287	162	469	384	360
Gm28523	-5.68843	0.819237	2.62938e-07	0	0	0	0	0	0	119	88	110	33	37	48	9	11	28	52	55	23				Dll3	0.7671	4.23715	9.68099e-05	5	0	5	1	3	1	34	26	29	30	51	39	11	44	28	1	2	0
Ccpg1	2.18596	0.372547	2.63062e-07	314	304	235	167	161	204	148	127	136	66	62	70	81	70	118	113	100	93				Abcb1a	0.415127	-2.12113	9.97098e-05	94	64	104	29	82	123	4565	5096	5094	6563	7400	7031	6544	10087	15212	24690	19988	18928
Dnal1	3.55369	0.539682	2.66561e-07	537	464	359	217	292	315	75	71	84	23	20	20	38	29	46	78	64	28				Tnfsf15	0.385532	-2.13759	0.000100014	1	0	0	0	1	0	29	34	55	66	73	59	159	147	93	397	287	363
Gm17189	4.52802	0.597492	2.71988e-07	193	166	201	224	177	140	5	1	0	2	2	5	82	19	16	74	68	31				Cd74	0.716507	-3.97385	0.000100299	41	20	37	43	189	97	12	32	50	14	9	10	31	24	64	103	200	941
Porcn	3.11437	0.458735	2.71988e-07	5055	4428	3329	1847	2437	3003	370	384	234	196	191	266	479	283	163	203	190	159				Pthlh	0.583562	2.90897	0.000102369	295	280	1331	1213	1611	895	103	98	73	149	118	199	73	131	42	44	35	8
Oplah	2.01305	0.351437	2.73337e-07	1477	1510	1048	651	805	944	695	743	566	866	619	722	299	299	936	806	823	820				Mansc1	0.251003	-1.12176	0.000103368	1446	1517	1738	1624	1496	1547	1115	1069	1002	491	605	618	632	728	1141	1310	1348	1080
4732419C18Rik	-3.22275	0.490259	2.74298e-07	12	19	17	13	10	18	146	103	69	97	129	149	35	15	17	6	10	6				Rps6ka5	0.247468	1.21105	0.000103735	266	345	233	221	246	243	768	774	943	564	443	449	115	161	236	201	166	171
Ppp3cc	1.42596	0.247061	2.74906e-07	240	242	184	206	250	200	98	139	147	91	107	97	121	105	149	309	331	298				Hoxb13	1.03076	-9.432	0.000103939	0	0	0	0	0	0	2	1	0	0	0	0	0	2	0	6837	4480	1955
Smbd1	-5.07566	0.676209	2.7742e-07	2	0	3	0	2	0	91	81	54	46	75	73	6	9	6	11	12	31				Il1rn	0.47972	-2.67736	0.000105597	2989	3683	1595	3749	3721	3059	624	924	731	2003	2806	1650	9501	6380	4865	17852	15535	17821
A330074K22Rik	5.94575	0.67884	2.79382e-07	175	134	117	30	28	57	1	1	4	0	4	1	1	1	6	3	0	1				Ms4a10	0.465351	2.24005	0.000105803	2	4	4	9	8	10	2820	3343	2813	6173	6204	6035	1278	1319	1960	890	991	744
Ap3m2	1.90324	0.313262	2.8248e-07	460	397	320	275	354	403	63	85	72	79	91	86	186	112	116	129	122	122				Pik3ap1	0.782277	5.88591	0.000105834	92	41	41	24	34	33	815	1025	1047	74	67	66	25	51	256	0	2	1
3110039I08Rik	6.94821	0.688619	2.85024e-07	2058	1146	1452	1129	1277	1323	4	1	3	0	1	1	115	34	4	369	551	56				Timp3	0.582289	-3.40726	0.000108079	244	230	607	154	344	342	136	105	156	36	26	51	148	60	43	2364	1338	944
Lrpprc	-1.08464	0.187941	2.86137e-07	2435	2281	2464	2717	2908	2396	6827	6413	6051	4426	4939	5329	4041	5035	4170	4471	3687	3561				Dusp5	0.412597	1.92616	0.000108278	710	710	625	747	1140	969	444	473	441	1045	1217	1062	1099	625	503	486	335	295
Otop3	4.38753	0.576705	2.93538e-07	3019	3290	1958	880	1254	986	296	525	420	119	69	90	0	3	2	0	0	2				Cgref1	0.45488	2.34689	0.000109354	556	441	368	294	318	267	2045	2358	2049	5461	4706	5000	604	807	1016	622	610	642
Cyp2e1	-6.24843	0.831972	2.96393e-07	1	0	0	0	0	0	93	148	146	142	101	112	2	32	40	0	0	1				Hebp1	0.693372	4.61796	0.000111866	93	80	36	14	9	9	274	372	241	122	111	190	12	14	69	1	1	4
Card10	1.39794	0.24193	2.99043e-07	5032	4660	4118	3243	4685	4223	2427	2493	2642	1416	1643	1775	2538	2398	2566	3729	3026	2752				Slamf9	0.401797	1.89462	0.000112161	307	135	246	239	387	357	167	125	131	170	271	199	653	954	586	94	62	52
Prkca	-1.51758	0.256037	3.05063e-07	1815	2144	1704	1745	1332	1309	5835	5907	5818	6098	6564	6880	5057	5533	6347	4542	4124	4880				Pip4k2a	0.408812	-2.28572	0.00011237	184	140	153	255	385	313	11	2	10	10	10	13	95	72	18	139	129	148
Mthfd2	-1.48012	0.260323	3.06325e-07	1095	1144	1189	1916	1427	1053	1849	1950	2136	1891	1991	2333	3195	3034	1557	1210	1142	1092				Nrtn	0.383881	1.93957	0.000113191	77	91	142	138	140	171	140	202	185	152	138	166	53	73	109	35	46	23
Mamstr	5.05289	0.703499	3.10285e-07	20	23	18	11	12	10	1	2	0	0	2	0	0	2	8	5	7	4				Acsl5	0.421238	1.99799	0.000113322	11430	12235	14330	18205	15928	14513	16659	18376	16138	42462	43595	43437	17710	19366	13890	12867	10264	10325
Nqo2	-1.0178	0.177127	3.18997e-07	450	477	374	479	577	528	1094	1189	1169	867	1029	1032	853	877	911	917	840	772				Mroh2a	0.455929	2.02689	0.000113713	7	8	2	5	3	3	32	37	38	55	59	84	60	80	22	27	20	18
Zfp334	3.09399	0.478681	3.24999e-07	371	340	335	148	265	226	44	54	52	25	30	30	86	29	67	84	87	51				Otub2	0.344548	-1.57376	0.000118041	205	211	183	149	160	234	22	16	23	28	38	29	51	43	82	72	70	67
Kifap3	1.00484	0.176734	3.25308e-07	1228	1243	919	905	978	954	740	758	799	511	555	616	813	831	864	996	827	800				Gpam	0.222849	1.04885	0.000119065	712	633	802	619	682	679	1693	1759	1586	1737	1829	2128	1036	1310	2145	764	690	561
Gm15292	-6.69386	0.854635	3.2844e-07	0	0	0	0	0	0	37	105	108	189	156	187	19	40	122	0	0	0				Trabd2b	0.661932	-3.50542	0.000120704	1	0	1	0	2	0	7	4	7	4	5	0	0	6	12	47	27	43
Def6	4.93801	0.595469	3.29822e-07	391	382	227	573	840	841	11	12	9	11	14	10	7	11	13	15	1	1				Gm39157	0.902731	4.71468	0.000121425	34	28	22	17	17	22	11	18	11	13	15	12	2	2	0	0	0	0
Bbox1	-7.26786	0.843246	3.3144e-07	0	0	0	0	0	0	43	63	68	129	139	186	3	2	4	10	0	1				Slc10a2	0.644778	-3.57931	0.000124047	298	327	286	92	59	138	18	37	40	147	134	86	1865	1257	2917	1425	1349	615
Cym	7.47073	0.610641	3.32079e-07	13625	8496	7097	2125	8612	21944	11	14	13	34	29	30	5	4	2	0	0	0				F3	0.50573	-2.8735	0.000125922	14752	13051	13584	16860	25425	20242	697	1002	675	2804	3332	2350	18111	8121	6859	35197	28062	25710
Zfp532	4.86067	0.676782	3.37837e-07	519	520	616	66	283	401	48	51	25	1	2	3	3	4	14	9	11	6				Ptgs1	0.645456	3.41913	0.000126868	836	640	875	1532	3349	2052	206	202	233	55	44	49	434	288	179	31	8	8
Mgat3	1.57304	0.275153	3.40067e-07	8474	9747	5802	5163	6710	6285	3908	4639	3961	4400	4087	4177	3005	2445	5231	5618	5357	5088				Gpr137b-ps	0.507907	-2.84488	0.000127631	1062	1012	718	402	413	373	46	85	82	67	114	91	349	85	77	1454	1068	849
Gm17783	-7.2594	0.857106	3.42511e-07	0	0	0	0	0	0	700	716	677	102	81	105	84	100	321	0	2	1				Gramd2	0.347005	1.60353	0.000128201	600	689	703	678	677	704	1325	1246	707	1894	2065	1944	755	731	534	803	712	654
Ltk	3.02888	0.479411	3.50536e-07	552	579	290	299	362	404	105	131	137	31	69	46	42	32	55	23	19	16				Tbxas1	0.927981	5.36557	0.000128625	6	5	5	14	46	19	68	75	67	6	15	26	4	2	4	0	0	0
Zfp30	3.41344	0.55734	3.52338e-07	194	146	160	53	110	126	35	64	44	15	13	19	17	24	51	2	18	18				Pdzd2	0.231805	-1.00945	0.000135655	45	60	35	38	28	30	241	241	251	193	163	213	24	22	75	176	231	209
Pxdc1	-2.63477	0.446157	3.53153e-07	298	238	194	258	432	311	448	521	368	932	867	859	500	159	115	377	282	311				Atp2c2	0.371405	1.87947	0.000136625	1274	1422	1093	850	1286	1660	948	937	655	444	585	691	443	594	761	247	159	68
Spp1	9.60915	0.769815	3.54057e-07	201174	179239	133617	149094	199910	155576	29	99	2	2	4	8	45	29	4	3582	434	144				Tigd3	0.519604	2.50742	0.000139429	23	19	18	7	22	13	52	29	41	87	87	96	27	34	15	21	10	18
Kif5c	4.08767	0.613809	3.54912e-07	29	42	25	54	43	40	6	6	5	5	4	1	5	2	26	19	23	7				Aifm3	0.357978	1.72795	0.000139715	345	266	194	190	243	192	117	112	108	52	69	105	100	73	78	22	26	33
Evl	3.77093	0.565574	3.65058e-07	798	941	742	684	1374	1299	183	251	111	55	62	57	19	83	79	2	1	2				Scnn1a	0.39448	-2.01858	0.000139765	1191	1844	899	1346	1140	1263	478	452	373	225	253	264	1378	813	410	3221	2608	1328
Acer1	-5.82867	0.81855	3.70918e-07	0	0	0	0	0	0	99	81	65	114	102	129	4	8	51	115	96	79				C1rl	0.422247	2.42288	0.000141364	227	258	156	96	65	109	753	962	763	332	339	426	68	83	439	51	33	14
Tmem221	4.10173	0.57027	3.70934e-07	149	109	134	69	66	81	5	6	0	8	6	4	16	11	11	11	12	8				Foxl2	0.776168	-5.87633	0.000141522	0	1	0	0	2	1	1	0	1	0	0	0	46	23	2	196	110	54
Aunip	-2.10338	0.359902	3.71831e-07	69	60	100	121	83	61	238	233	241	201	210	272	166	271	108	264	216	226				Trim38	0.926638	6.16556	0.000142885	0	0	0	0	0	2	35	43	36	233	213	211	3	1	9	0	0	1
Nek7	1.43986	0.248194	3.73466e-07	3697	3920	2814	2380	2630	2921	1202	1305	1274	904	923	1027	1395	1243	994	4210	3172	3115				Gas6	0.537501	-1.91892	0.000146166	14501	17743	7945	2883	3420	5504	10341	11231	9436	2065	1719	2333	1477	2291	9191	9521	8603	6594
Ddx39	-1.74996	0.310986	3.86007e-07	1460	1498	1680	2510	3169	2064	2680	2857	2711	3170	3463	3921	5258	6867	2691	3439	2864	2949				Map9	0.549502	-2.11816	0.000146489	205	126	154	37	59	50	22	40	36	12	9	10	7	11	36	17	51	59
Marveld1	2.96703	0.495337	3.86653e-07	1925	1714	1562	1086	1071	1167	533	669	637	153	139	202	403	424	688	317	315	252				Thnsl2	0.377895	1.91351	0.000147	96	85	39	48	49	65	666	729	512	855	786	1006	129	169	359	108	124	149
Pgghg	1.32453	0.234744	3.97635e-07	1631	1697	1694	1396	1264	1197	1223	1307	1153	676	778	842	858	991	1225	947	862	938				Lgals1	0.608415	3.32173	0.00014714	418	337	630	760	1453	1410	152	232	69	146	147	172	65	48	74	42	7	5
Bcam	3.73196	0.56786	4.12519e-07	14413	14854	10753	7321	8852	9923	1821	2269	2263	349	498	501	949	1060	1310	1048	755	371				Sftpd	0.668734	2.91906	0.00014785	12471	12286	11741	6784	9014	11494	18	42	107	30	29	36	225	128	7	15	20	0
Anks4b	-3.64263	0.524414	4.16495e-07	152	311	187	465	284	201	2573	2752	2853	5861	5623	5724	1636	1651	2693	3127	3384	3125				Afp	0.770284	5.40005	0.000152417	6	10	9	14	18	30	1373	1158	1904	132	63	104	5	7	13	2	8	7
Zfp324	1.19909	0.212704	4.32302e-07	555	488	398	370	462	454	330	357	370	211	245	260	237	252	299	295	311	311				Selenom	0.252868	-1.04269	0.000154881	380	368	325	176	192	166	685	839	896	383	427	540	265	498	1416	379	528	454
Adam15	1.23845	0.219776	4.57525e-07	2349	2394	2034	1313	1867	1824	1389	1365	1147	995	1018	1224	1099	1307	1436	2202	1989	1570				Gm13053	0.829664	4.41956	0.000154899	10	5	10	5	9	3	9	7	6	34	18	32	4	1	0	0	1	1
Msn	4.59372	0.546471	4.57525e-07	4666	3470	4839	5755	9753	8038	11	20	3	41	80	31	2864	1286	227	3615	2459	1757				Slc28a1	0.908683	5.9891	0.000156033	0	0	0	1	0	0	32	47	40	38	27	31	0	0	0	0	0	0
Urad	-5.64854	0.813072	4.62695e-07	0	0	0	0	1	0	116	118	82	57	67	85	19	18	58	2	20	27				AC122217.2	0.808632	-4.82719	0.000157018	0	1	0	0	0	0	0	3	0	0	2	1	3	8	8	17	48	58
Cracr2b	1.19937	0.213226	4.66638e-07	994	1042	747	884	731	964	604	722	651	438	494	536	736	844	1035	786	577	511				Ttr	0.513089	3.07019	0.000157899	35	47	46	34	50	20	946	975	987	239	253	361	20	48	108	44	33	12
Zfp516	1.32975	0.23053	4.66737e-07	2032	2047	2244	1876	2150	2161	817	815	655	677	781	757	1269	780	960	852	692	598				Slc5a4b	0.981835	6.1914	0.00015807	0	0	2	6	0	0	47	69	72	1043	1067	914	11	9	20	1	2	0
Btnl1	-8.91585	0.824225	4.68485e-07	0	0	1	0	0	0	1633	1747	1720	4319	3850	4338	15	59	497	11	156	275				Ppp1r16b	0.8562	5.68627	0.000158458	0	2	1	0	5	2	43	65	56	43	38	41	0	1	0	0	1	0
Fyco1	1.24118	0.219378	4.69379e-07	3499	3666	4098	3205	2519	2924	2037	2027	2083	1510	1650	1682	1813	1639	1939	2710	2516	2423				Pglyrp1	0.276813	-1.28968	0.0001591	5931	5442	9794	9300	8932	7752	3593	4034	3808	4453	4607	4497	6651	6439	6120	15758	13181	10752
Frmpd1	5.00193	0.607902	4.90129e-07	356	280	150	81	294	240	5	4	4	5	2	5	15	8	5	3	8	3				C1qtnf1	0.520381	2.66269	0.000162043	331	376	973	1646	1159	875	95	103	69	69	80	72	46	36	30	14	19	20
Agtrap	1.18859	0.21017	4.93017e-07	1895	1809	1581	1475	1697	1662	1082	1069	1013	630	726	741	990	1047	969	1491	1341	1067				Upk3bl	0.481774	-2.18809	0.000163586	63	42	48	37	33	30	8	21	6	9	12	5	21	12	43	49	27	29
Cisd3	-2.03143	0.338686	4.96791e-07	279	373	276	435	359	338	1370	1461	1259	1683	1798	2130	929	1275	1411	1888	1609	1614				Ahnak	0.349586	-1.76843	0.000166232	9366	9558	10842	15290	13567	11448	2230	2824	2179	4791	5337	4551	30651	18927	11838	32911	20388	25786
Cpne4	5.44842	0.67927	4.99428e-07	137	93	209	212	416	640	2	6	8	6	5	8	0	3	15	6	0	4				Acsl1	0.254457	1.17188	0.000166429	1536	1513	1432	830	969	889	4411	4474	4864	3461	3754	4018	1643	2014	1769	2142	1657	1320
Chad	6.27525	0.589684	5.00685e-07	374	398	207	300	334	284	10	8	5	0	0	0	0	2	0	0	0	0				Xkr9	0.595593	3.15317	0.000166429	71	83	45	98	89	45	130	157	154	726	609	610	103	105	139	52	38	45
Cd59a	4.62495	0.63307	5.07111e-07	112	107	19	20	28	46	11	8	6	0	0	1	0	0	2	0	0	0				Kit	0.516692	3.19936	0.000167448	250	312	160	315	158	123	3176	3201	3091	594	643	714	404	735	2389	63	79	56
Usp1	-1.53737	0.270309	5.15548e-07	1021	1259	1193	1722	1587	1495	3144	3470	3520	2498	2738	3093	3258	4523	2505	2894	2885	2788				Gm30414	0.450483	-2.53283	0.000167938	461	427	548	438	297	484	51	45	49	163	126	114	1058	526	180	1481	1363	1383
2810459M11Rik	1.87814	0.350816	5.22334e-07	1108	1264	805	567	593	604	1082	1136	962	734	879	874	51	167	453	774	527	470				Gm45865	0.94236	5.07668	0.000171304	0	1	1	1	0	1	3	10	5	20	18	27	1	0	0	0	0	0
Cd164l2	4.02438	0.598481	5.23031e-07	144	128	89	22	36	33	18	24	18	6	4	8	2	4	11	5	3	2				Evi5l	0.250015	-1.12793	0.000172268	543	513	423	410	364	402	280	279	310	296	275	259	412	245	373	737	667	491
Cox20	-1.1271	0.199489	5.25301e-07	209	233	224	220	180	194	496	425	444	404	408	470	433	528	378	351	349	352				Lifr	0.678988	-4.8014	0.000174723	827	828	1142	428	836	941	1	0	3	1	0	1	19	15	0	94	83	183
Polr3g	-1.06447	0.190975	5.28496e-07	629	644	592	801	848	705	916	948	968	973	1049	1016	1020	1241	707	1326	1185	1096				Ptafr	0.913315	5.74652	0.000175822	0	1	0	1	0	1	14	17	11	84	78	72	0	0	0	0	0	1
Esam	2.29597	0.373509	5.48381e-07	551	494	774	863	577	577	106	122	119	106	102	165	124	129	115	8	21	13				Sox6	0.499712	2.688	0.000175822	32	17	54	52	47	26	906	946	1071	555	577	599	148	238	377	21	81	109
Sptb	3.41415	0.586943	5.55997e-07	99	79	113	54	69	96	55	51	86	15	8	9	8	11	73	1	1	0				Sox13	0.287053	-1.26446	0.000177893	1304	1446	1223	1109	1652	1568	820	902	847	437	469	434	1133	1212	1652	1180	1085	1413
Lypd3	5.01847	0.634135	5.58106e-07	214	156	116	98	116	90	1	0	3	4	1	7	16	4	8	1	3	3				Mirt1	0.5691	2.41362	0.000179586	81	76	89	43	69	90	22	28	23	107	92	88	266	126	28	38	35	9
Rnf103	-1.39183	0.245963	5.58106e-07	1688	1786	1404	1530	1580	1560	2515	3143	2757	3671	3567	3606	3492	2926	2364	2889	2673	2925				Bcl2l15	0.885883	4.46003	0.000180521	17	20	6	43	42	34	13	7	5	268	411	301	379	333	230	6	3	1
A930004D18Rik	3.57792	0.504357	5.71255e-07	136	179	172	105	211	194	5	9	0	6	5	4	43	38	10	57	44	31				Mptx2	0.945471	6.19586	0.000182933	0	0	0	0	0	0	148	181	438	2550	1539	2666	67	370	932	2	4	0
H2-T3	-7.49409	0.832397	5.75548e-07	0	0	0	0	0	0	1326	1518	1653	958	770	1023	4	23	346	2	47	76				Thsd4	0.234942	-1.07486	0.000183489	1670	1848	1233	1920	1810	1674	583	749	687	497	632	544	782	469	424	1748	1867	1707
Eml2	1.22388	0.215837	5.76148e-07	3822	3560	3854	3479	3957	3739	1688	1916	1472	1283	1570	1606	2818	1765	2308	4001	3342	3332				Pcdh19	0.868647	5.38856	0.000184151	1	3	4	0	8	5	20	43	54	68	50	63	0	4	4	0	0	1
Hook3	1.51	0.266621	5.97154e-07	2211	2207	1756	1668	1850	1783	962	1090	1304	657	675	705	1001	845	1026	1595	1310	1173				B3gnt5	0.606905	-3.59146	0.00018419	2	1	1	2	8	17	106	82	93	30	54	48	194	128	163	1701	1074	436
Psmb10	-1.28673	0.220515	5.99144e-07	444	488	425	392	346	395	1941	2134	2172	1973	2027	2221	1026	1410	2425	2181	2283	2761				Psat1	0.31473	1.35653	0.000187665	2211	2342	4482	5947	4601	3752	4164	3953	3805	3668	3942	4415	9537	10377	4079	3658	2737	2682
Traf1	4.58463	0.631252	6.04753e-07	84	68	61	35	74	93	5	7	6	0	0	0	2	8	5	14	15	8				Itpka	0.361343	1.90868	0.000188545	153	179	76	76	48	63	396	447	446	370	373	411	40	64	247	49	40	33
Zfp825	1.09394	0.1975	6.20125e-07	393	392	400	307	276	340	303	301	306	246	224	231	174	209	261	211	186	182				A930024N18Rik	0.482218	2.54605	0.000189323	22	16	16	11	17	8	67	66	71	44	48	46	5	10	21	3	6	5
Fkbp1b	3.51703	0.562832	6.33849e-07	65	44	33	21	33	24	6	3	8	5	2	5	11	16	23	22	8	15				Pepd	0.297664	1.29886	0.000189323	3580	3528	3850	5078	5188	5028	2111	2489	2131	4076	4200	3835	4701	3920	2152	2822	2276	2254
Xbp1	1.35522	0.240072	6.37316e-07	15767	15220	17921	12140	10836	13201	6985	7371	6661	6495	7058	7357	4998	4332	5695	5645	4645	4100				Syt13	0.538836	2.9022	0.000192902	1	2	0	1	0	1	139	165	222	59	72	91	20	53	106	9	8	2
Tph1	-4.54083	0.566835	6.76879e-07	9	7	3	0	7	5	1096	1186	2067	457	384	480	57	166	639	75	90	39				Tmem86a	0.357073	1.75549	0.000194994	143	131	105	73	109	87	341	357	373	476	554	512	111	132	285	84	77	105
Amer2	3.93658	0.593683	7.02188e-07	164	161	103	28	93	88	32	22	30	2	3	4	0	0	2	6	4	3				Nat8f1	0.321015	1.59239	0.00019507	45	39	37	24	17	23	211	198	202	204	154	221	26	20	54	46	38	37
Alpi	-8.65705	0.73381	7.064e-07	4	39	26	1	0	0	47615	52170	40165	31067	27820	31168	161	329	1004	1297	1509	1777				Otud1	0.415161	-1.83318	0.000196254	114	134	93	124	120	108	55	62	62	19	27	14	43	35	75	122	88	96
Cd83	-5.6111	0.737078	7.08308e-07	0	0	1	0	0	2	364	372	391	104	95	118	19	40	122	9	16	8				Gimap1	0.616121	3.46703	0.000198172	5	2	0	2	1	1	218	189	107	70	87	47	21	67	115	4	5	3
Rab32	-1.03562	0.189336	7.09797e-07	301	290	292	327	376	374	280	328	288	337	384	371	622	684	297	1149	964	876				Gstt1	0.358993	1.85777	0.000198172	1274	1323	609	685	549	536	2380	2616	2422	1065	1180	1189	369	317	865	278	225	223
Psca	5.68308	0.635184	7.16891e-07	5690	6898	2165	11622	15490	13811	11	36	18	107	122	80	2963	1930	1626	59	49	41				Arrdc3	0.393459	-1.74457	0.000199201	844	859	1223	575	407	527	1387	1339	1625	1715	1667	1437	493	324	1285	3602	3478	2601
Grhl2	1.06458	0.192208	7.25662e-07	3111	3123	2969	2431	2718	3032	2263	2204	2054	1329	1431	1671	1987	2195	2232	3030	2623	2318				Ces1b	0.760085	4.47735	0.00020055	6	0	1	3	1	1	79	80	61	61	45	88	6	22	67	0	0	2
Wipf1	-2.42927	0.397274	7.25662e-07	123	119	183	85	112	113	672	663	572	860	850	996	811	986	972	899	1010	1386				Slc11a2	0.362318	-1.58649	0.00020055	1511	1628	1785	1943	2170	2063	19704	26703	15749	18209	12105	16644	3004	2996	12133	27323	40075	17767
Ctsf	3.47338	0.570725	7.26568e-07	1385	1000	662	291	393	586	181	246	273	63	75	36	76	54	154	250	275	218				Fyn	0.671952	3.39717	0.000203882	19	12	3	6	10	9	35	31	41	26	33	12	23	34	26	4	2	0
Inka2	2.67876	0.420658	7.27008e-07	495	413	408	370	650	651	19	40	75	33	49	45	328	263	162	239	175	124				9530034E10Rik	0.888772	4.30335	0.000205532	52	76	55	104	50	34	4	7	5	23	26	23	18	8	22	0	0	0
Slbp	-1.17017	0.210059	7.33357e-07	714	764	822	870	941	832	1651	1759	1862	1258	1420	1514	1606	2204	1323	1549	1422	1413				Selenbp2	0.48646	-2.33461	0.000205669	892	876	1333	1050	545	572	886	960	467	1330	1400	1442	515	304	955	3845	6280	4435
Arhgef10	2.93933	0.479929	7.38774e-07	1465	1656	1063	1020	1074	1063	318	340	350	104	112	122	336	269	298	120	178	187				Sdsl	0.318125	1.59467	0.000206586	727	801	655	775	768	748	1755	2007	1673	786	874	791	194	225	603	286	186	194
Calr3	3.34208	0.536266	7.38774e-07	487	502	257	296	166	166	73	100	82	30	27	25	40	32	58	52	28	36				Selenbp1	0.51551	-2.50149	0.000214106	6089	5575	8720	6884	3761	3837	4062	4729	2126	7945	8272	7663	2765	1756	5560	24144	39335	28317
Fbxo10	2.41811	0.425859	7.45179e-07	473	465	380	176	275	305	192	221	176	88	65	109	101	112	170	97	115	136				Capn5	0.30772	-1.43911	0.000214739	8745	8872	7549	7044	6167	6657	2535	2703	1916	3378	4049	3594	8299	5362	4976	13603	10991	10767
Defa32	-8.1481	0.856065	7.61559e-07	0	0	0	0	0	0	494	844	889	2047	1528	1814	612	1412	12339	0	5	0				Lca5	0.295977	-1.33823	0.000215542	399	408	404	249	277	227	114	147	124	85	104	100	83	60	61	336	265	287
Ahcy	-1.71663	0.300647	7.6704e-07	294	300	422	521	522	455	1372	1339	1094	1021	1129	1268	905	1166	870	1383	1269	1283				Psg25	0.558193	2.60158	0.000219886	4	2	8	11	10	4	25	30	25	48	27	19	13	15	4	9	9	5
Megf8	1.21511	0.216465	7.71872e-07	3903	3568	4031	2720	3800	4125	1559	1784	1584	1418	1673	1636	2055	1518	1783	2899	2657	2477				Gstm6	0.537812	2.89721	0.000222256	232	242	198	108	54	89	728	712	510	1386	1347	1607	94	62	125	97	135	100
Abhd1	-2.0787	0.349279	7.71902e-07	70	75	66	39	54	42	248	317	224	336	314	336	106	100	120	163	150	129				Mamstr	0.715206	-3.01795	0.000222783	20	23	18	11	12	10	1	2	0	0	2	0	0	2	8	5	7	4
Mab21l3	3.56753	0.569679	7.76606e-07	569	371	637	110	118	321	102	118	46	50	42	38	78	72	202	17	15	10				Matk	0.575314	3.16332	0.000231703	106	99	106	39	40	95	126	128	140	59	37	52	16	33	94	4	1	4
Fam49a	3.19897	0.556843	7.82586e-07	832	880	661	732	672	524	264	314	408	57	64	89	40	145	193	49	48	31				Irs2	0.249988	-1.06338	0.000232409	1103	1135	979	1041	855	635	2313	2428	2114	1490	1486	1537	893	667	2093	2497	2293	1996
Pou6f1	2.86316	0.477202	7.8697e-07	566	518	519	253	336	443	105	154	148	33	52	61	189	142	204	352	320	296				Nudt4	0.34179	-1.57034	0.000232409	5234	4351	4700	2378	3304	3349	2829	2961	2817	4382	4328	4072	5869	5437	6255	10154	11119	11795
Vnn1	3.75645	0.59178	7.90286e-07	6487	5767	1826	2393	3999	5668	741	1161	1490	285	303	252	161	179	445	61	98	19				Irgm2	0.349982	-1.54829	0.000237912	243	278	158	120	177	232	93	115	133	108	84	78	160	86	202	234	283	203
Fbxw4	1.19121	0.215116	7.92627e-07	622	595	523	494	551	632	346	376	368	286	327	382	316	252	406	539	452	578				Gm13111	0.879578	6.16844	0.000238241	126	109	93	44	96	92	177	216	233	18	19	34	1	2	2	0	0	0
Hdhd3	-2.12804	0.348861	7.97473e-07	151	161	110	101	123	134	880	915	812	1092	1255	1158	216	313	532	555	567	431				Gm47708	0.642904	-5.64712	0.000238532	0	0	2	1	0	3	0	2	1	0	1	3	0	0	1	83	91	73
Arhgap8	1.87091	0.332082	8.07295e-07	870	979	911	744	854	812	594	538	484	317	371	367	169	238	329	57	94	26				Pxylp1	0.292493	-1.24792	0.000238532	623	691	646	615	535	630	1393	1379	1250	714	719	797	512	877	1307	2162	1631	951
Zfp697	2.86617	0.465866	8.07295e-07	770	556	468	408	1032	952	128	159	191	83	68	74	167	157	191	124	126	140				Tm4sf1	0.635568	-3.49783	0.000239469	14	33	1	42	7	15	15	16	8	20	29	15	112	86	142	247	283	222
AC130529.1	8.20976	0.765815	8.31647e-07	421	538	590	698	857	924	0	0	0	0	0	2	0	0	0	2	1	0				5830416I19Rik	1.00592	-6.29039	0.000240983	0	3	0	0	0	0	0	0	0	0	0	0	0	4	1	71	113	41
Rab3c	-6.01195	0.813342	8.32161e-07	1	0	0	0	0	0	233	264	447	93	97	102	17	54	137	4	16	5				Limk1	0.313419	-1.47499	0.000240983	425	325	237	349	480	326	136	114	113	185	171	228	437	376	283	788	576	660
Homer2	1.29179	0.232581	8.55901e-07	8499	9209	6853	7970	8390	7993	4838	5272	5547	3670	3645	4412	1597	2528	2383	2447	1893	1398				5033404E19Rik	0.832707	-2.51138	0.000243213	0	0	0	0	0	0	9	9	12	0	2	0	0	0	43	18	11	13
Cd68	3.6641	0.516338	8.68968e-07	2467	1847	1815	1714	1036	1193	81	94	46	45	74	65	339	86	77	142	163	215				4921531C22Rik	0.278887	-1.19872	0.000243239	57	45	43	35	46	44	69	57	71	48	29	45	49	46	84	79	90	80
Thnsl1	1.28006	0.229405	8.75421e-07	975	872	1066	784	766	978	466	469	436	399	398	388	594	436	558	703	632	572				Dnah2	0.685669	3.80333	0.000245251	69	35	21	9	11	14	263	296	198	1175	1219	1021	124	32	88	39	44	35
Fam107b	1.60112	0.279919	8.80258e-07	9970	10055	7772	11183	13894	10719	3447	3864	4207	2228	2548	2888	5320	4522	4094	5845	5099	5133				A530072M11Rik	0.50182	-2.38474	0.00024562	22	13	16	4	13	16	6	4	8	9	8	8	9	11	17	33	44	24
Brdt	2.58287	0.445083	8.99754e-07	59	54	42	35	48	27	14	17	23	10	14	17	18	11	38	8	8	8				Ugt2b38	0.964056	6.1682	0.00024562	0	0	0	0	0	0	11	38	11	67	74	69	0	0	0	0	0	0
Plcxd2	-2.15739	0.378688	9.13832e-07	213	220	312	408	356	293	538	522	680	973	980	912	924	723	526	869	738	655				Arl6	0.281792	-1.25271	0.000251603	581	595	351	335	420	423	56	63	77	71	80	64	116	106	92	209	188	171
Phlda3	2.18387	0.359795	9.21046e-07	2193	1950	2177	2216	3815	3093	203	304	389	318	433	358	1571	1136	951	1549	1206	859				Slc16a12	0.697395	4.48326	0.000253607	11	4	23	1	0	2	834	871	920	303	269	412	13	15	29	16	13	2
Pcdhgb4	3.89267	0.657341	9.27846e-07	107	51	69	10	75	32	25	19	24	6	1	7	2	2	49	12	14	1				Gm10812	0.354759	-1.55677	0.000255535	49	74	40	41	36	27	47	45	46	27	21	25	42	40	53	84	82	73
Gm16505	5.04364	0.648692	9.28558e-07	264	260	138	96	70	108	4	2	7	0	3	3	18	9	9	26	9	6				CT010496.1	0.895099	-2.7044	0.000261215	71	48	56	16	18	18	0	1	0	0	0	0	0	1	6	1	2	2
Syt11	2.35835	0.41476	9.53225e-07	431	373	379	169	202	236	142	143	137	87	71	77	35	62	61	167	141	113				Nat8	0.962426	6.80102	0.000261408	0	0	0	0	1	0	86	97	87	655	595	623	2	1	15	0	1	0
Zdhhc15	3.57325	0.642906	9.79574e-07	670	657	1079	420	995	1260	267	289	365	32	49	29	11	80	165	33	64	54				Nebl	0.592537	-3.44312	0.000261827	146	109	131	435	586	632	115	135	185	56	62	43	719	339	246	2542	1985	1897
A930038B10Rik	-3.20777	0.500485	9.91255e-07	35	21	20	25	31	28	169	165	156	358	295	378	51	49	60	43	28	23				Saa3	0.874211	-4.35074	0.000261943	0	0	0	0	0	0	5	6	20	2	0	8	1	3	21	7	45	353
Eif1ad	-1.35539	0.246559	1.00317e-06	1052	1082	1111	1224	1483	1424	1846	1827	1882	2172	2371	2446	1969	2605	1475	2315	2190	2100				Ccdc122	0.286035	-1.28259	0.000264725	294	325	264	325	394	397	203	209	185	195	189	145	428	238	366	486	576	462
Tmem38b	1.67356	0.294099	1.00395e-06	969	1003	985	630	603	817	224	297	242	254	309	284	373	350	335	525	446	420				Gpc1	0.385064	-1.97051	0.000265354	1872	1578	1985	1960	3366	2958	26	40	24	48	65	49	100	76	33	650	436	209
Htra1	4.6319	0.662059	1.01007e-06	217	166	212	18	82	72	16	10	8	3	2	2	12	22	25	2	2	0				4930503L19Rik	0.438451	1.98243	0.000269733	50	59	50	35	55	47	77	87	141	57	66	58	59	101	30	33	31	16
Sox7	7.53035	0.772052	1.01423e-06	212	177	131	55	92	172	0	0	0	0	1	0	1	2	0	0	2	0				H2-Ab1	0.58183	-2.10307	0.000270785	169	148	108	75	66	75	20	29	13	33	26	45	12	6	322	24	28	72
Adgrg1	1.87689	0.326383	1.03008e-06	9540	9408	9691	6053	7869	7678	2919	2927	3053	1455	1742	2065	2122	2691	1669	3591	2857	2642				Aplp1	0.38018	-1.70214	0.00027135	773	599	1025	408	598	791	470	599	525	758	739	678	601	455	1089	1747	1492	1865
Fmo1	-5.43308	0.811145	1.05089e-06	0	0	0	0	1	0	59	81	34	46	56	61	7	5	23	3	4	2				Serpinf2	0.724786	4.54797	0.00027718	19	19	3	11	8	10	182	159	166	45	46	47	4	6	14	1	0	3
Samhd1	-1.08028	0.19382	1.05458e-06	1265	1198	1043	1371	1334	1481	4064	4079	3928	3181	3133	3773	1497	1876	2192	1733	1420	1518				Ap1s2	0.322472	-1.5392	0.000278357	119	172	186	299	333	216	153	139	130	119	189	135	440	455	277	918	650	576
Pfkfb4	-1.69336	0.282763	1.06037e-06	410	404	236	262	252	234	3115	3196	2620	2817	2842	3005	185	254	713	541	537	394				Gm45353	0.900343	4.71993	0.000279361	34	29	12	16	31	46	24	18	38	6	14	18	3	2	3	0	0	0
Lamc1	1.30961	0.227742	1.0763e-06	8526	8400	12550	9171	10660	10564	1621	1945	1632	1875	2285	2057	5154	4604	2140	3257	2188	2517				Bbox1	0.745165	4.3197	0.000281516	0	0	0	0	0	0	43	63	68	129	139	186	3	2	4	10	0	1
Ctsl	2.19208	0.366362	1.07799e-06	15875	13746	10546	13133	19101	17706	1694	2066	1793	2823	3034	2735	5870	3750	4385	8967	7249	6331				Baiap2l2	0.317319	1.40809	0.000286377	614	618	879	590	946	457	6805	6548	6615	4242	5283	6296	3780	5153	4383	3611	1827	1655
Abhd3	-3.30494	0.502118	1.08301e-06	123	157	77	230	166	157	1739	2182	2145	2870	2572	2731	622	573	1069	15	31	56				Sec24d	0.51221	2.45441	0.000293736	3183	3234	4124	4806	3339	3199	1702	1849	1466	5888	6000	5833	2381	1686	1816	1181	825	827
Haghl	1.20352	0.214669	1.08776e-06	1893	1661	1589	1263	1833	1396	543	630	466	468	574	531	796	800	509	917	890	753				Cyp2d9	0.640633	-3.25005	0.00029573	2	1	2	4	4	8	28	27	10	55	32	32	11	2	54	220	265	218
Dagla	1.31455	0.238533	1.09409e-06	867	900	1010	733	753	901	516	558	565	462	493	438	399	419	572	166	152	85				Cyp3a59	0.967349	6.55384	0.00029573	0	0	0	0	0	0	63	51	48	169	166	142	0	1	6	0	0	0
Dennd5a	1.69552	0.297691	1.09577e-06	878	840	781	627	1117	1078	263	266	382	199	257	266	574	484	520	337	234	274				Gm36945	0.397443	1.95927	0.00029573	18	46	21	39	14	15	501	522	506	309	273	340	131	110	295	71	40	66
Vasn	2.89238	0.460294	1.10091e-06	965	970	1243	766	1229	1177	198	206	158	52	73	105	137	117	85	109	111	112				Acvr1c	0.42507	2.38842	0.000297207	98	119	63	53	60	52	413	397	436	128	149	142	10	32	188	6	16	8
Ano9	-1.41518	0.250507	1.11694e-06	2175	2496	1882	1755	1503	1644	5983	5959	6080	6371	6637	7353	3526	4724	4500	3783	3447	3698				Scgb2b15	1.09625	1.34324	0.000297207	0	0	0	0	6	0	4	0	0	4	14	4	0	2	40	0	0	0
Mal	4.96213	0.586655	1.14029e-06	10487	12024	6602	5395	7496	7669	15	35	18	99	111	91	1292	806	176	1832	879	546				Serpinb8	0.639801	-3.90559	0.000299556	278	297	404	324	366	438	0	0	0	0	3	1	59	20	2	87	62	52
Mxd4	1.25675	0.229994	1.14414e-06	2972	3052	2203	1646	2515	2416	1562	1616	2003	1172	1325	1467	1190	1151	1513	2118	1822	1733				Il1r1	0.501681	-2.63924	0.000303113	543	625	346	281	439	776	2	12	11	6	6	5	77	55	13	93	107	103
Gm3054	-6.59406	0.847489	1.146e-06	0	0	0	0	0	0	90	68	46	260	213	184	17	10	92	279	190	308				Fam83b	0.281869	1.24095	0.000305922	525	620	672	655	644	584	2551	2894	2489	3771	3915	3839	1948	1866	2325	1791	1357	1327
Meis1	7.28424	0.756729	1.16033e-06	325	311	247	227	205	156	1	1	0	0	0	0	3	4	0	21	21	3				St3gal5	0.841547	3.99651	0.000306002	696	650	476	335	501	514	16	30	29	5	5	8	9	7	8	0	0	0
E2f8	-2.23166	0.396541	1.19212e-06	381	559	769	1044	915	732	2617	2436	2327	1541	1762	2318	2499	3940	1526	2070	1674	1774				Ttll6	0.856118	-4.17759	0.000306321	24	20	2	3	2	2	19	16	7	1	0	0	2	5	1	371	223	102
Lypd6b	3.91039	0.606617	1.2059e-06	367	617	136	109	108	93	37	32	38	15	10	12	19	26	28	45	32	26				Gm8074	0.738765	3.66441	0.000308965	21	25	5	39	45	17	15	11	8	59	53	39	23	5	5	1	5	3
Syt13	-4.77263	0.683368	1.22186e-06	1	2	0	1	0	1	139	165	222	59	72	91	20	53	106	9	8	2				Pou2f3	0.776944	5.20613	0.000315399	53	31	76	3	10	14	501	532	502	69	86	109	96	134	298	0	1	4
Ssx2ip	-2.13955	0.365113	1.22928e-06	602	581	588	572	829	731	2409	2551	2239	3772	3481	3931	1601	2221	2272	2782	2972	2730				Edaradd	0.833932	4.44176	0.000318269	2	1	6	29	26	27	27	41	55	21	12	30	5	3	1	2	1	0
Ankrd13d	3.15955	0.489979	1.25848e-06	257	240	232	150	169	200	30	25	18	2	25	15	45	38	27	59	38	39				Cers3	0.554885	-3.20653	0.000320913	399	339	200	185	147	281	2	14	3	10	12	14	590	176	57	420	171	217
Tlr1	-2.88565	0.490399	1.2995e-06	0	1	6	14	11	5	39	41	58	34	40	25	312	313	231	2135	2203	1779				Psph	0.276378	1.14335	0.000321987	404	383	439	672	556	445	413	460	476	679	661	759	1559	1637	633	555	569	456
Hcn2	1.87115	0.335878	1.30501e-06	759	818	991	915	734	900	333	416	311	391	391	401	284	198	500	743	801	775				Slc22a13	0.79692	3.5469	0.000326392	0	0	0	2	2	0	6	9	7	53	64	70	1	1	0	5	4	0
Tdrkh	-2.72267	0.442783	1.39684e-06	15	18	18	22	15	16	172	183	244	114	148	186	160	65	179	83	64	95				Slc43a2	0.560187	2.94494	0.000330875	638	620	415	304	742	631	658	698	839	2580	2576	2588	657	728	1520	231	189	127
Fscn1	5.76442	0.635195	1.39753e-06	590	451	508	591	2065	2257	1	7	8	6	6	2	54	21	11	2	3	3				Hdac9	0.813638	-6.13048	0.000332614	7	14	10	6	13	7	0	1	0	0	0	0	0	0	0	137	54	18
Gm11295	-1.99009	0.352783	1.4055e-06	36	53	61	77	78	56	139	163	133	177	193	212	91	96	71	133	134	113				Neurod1	0.569115	3.11142	0.00033291	0	1	1	0	0	1	242	214	264	82	70	74	22	59	131	8	7	3
Gm38910	1.81612	0.323483	1.42647e-06	241	251	294	311	402	330	124	147	117	73	87	86	120	135	157	197	160	158				Mtmr7	0.26073	-1.14077	0.000333288	364	398	313	346	328	195	855	892	818	962	1014	1048	820	794	1106	2303	1852	1638
Dock11	1.73025	0.305989	1.43807e-06	4790	5082	4334	3710	3785	3992	1326	1721	1799	1115	1213	1307	1462	1964	1495	557	363	221				Tpbgl	0.782527	4.7214	0.000334189	4	1	3	2	2	3	22	41	13	120	104	156	2	2	2	2	4	0
Paxip1	-1.17585	0.216744	1.45649e-06	1120	1227	1132	1274	1387	1180	2572	2441	2395	1715	1891	2175	2327	3266	1723	2240	2035	1874				Gm2420	0.791219	2.9882	0.000334799	5	0	5	1	10	0	6	11	9	32	37	31	9	12	0	8	3	0
Fbxl20	1.40665	0.257327	1.45706e-06	4071	3997	3393	2343	2846	3130	1975	2129	2062	1342	1353	1588	1789	1363	1866	2249	1907	1668				Kiss1r	0.357241	-1.55814	0.00033636	72	83	58	35	37	46	44	43	29	25	35	33	33	29	44	111	68	74
Slc16a2	4.65729	0.608265	1.47166e-06	843	796	895	543	822	911	52	41	54	9	10	7	9	21	7	1	0	1				Aldh1a7	0.52884	2.60055	0.000336884	2381	2483	3072	4108	3312	3588	542	600	394	1633	1903	1737	107	197	120	203	299	264
Uqcrc1	-1.08672	0.199118	1.47166e-06	7535	7855	8307	8283	9023	8447	15658	16554	15391	17306	18214	20057	10173	11380	10959	14580	13025	11288				Defa-ps18	0.953926	5.29741	0.00033965	0	0	0	0	0	0	15	21	49	118	50	93	17	26	124	0	0	0
Urah	1.99357	0.360081	1.47191e-06	715	741	562	323	541	507	353	374	244	188	182	170	302	253	407	238	261	243				Gm12611	0.326185	1.34345	0.000341853	209	267	445	611	450	379	296	419	345	408	429	432	929	1039	358	351	303	295
Aldh9a1	-1.34732	0.241902	1.4964e-06	2650	2885	2830	3547	2740	2134	9371	9754	8032	8318	9011	9926	4135	5063	5718	4098	3929	3647				Rnf227	0.403017	-1.60951	0.000342786	63	48	25	35	42	38	45	62	62	24	21	18	14	29	59	51	64	56
Cfi	4.15693	0.603221	1.50275e-06	5624	6550	7834	2411	2896	4825	774	856	717	120	157	185	47	31	61	8	3	2				Skp2	0.307822	1.30678	0.000349102	283	315	468	534	639	570	965	895	967	733	729	915	765	1121	535	624	524	436
Akap7	-1.19242	0.214337	1.51333e-06	608	579	582	774	569	545	2456	2431	2399	1707	1808	1883	1012	1216	1545	1712	1508	1393				Ryr1	0.347373	-1.51009	0.000354037	47	39	34	40	53	51	13	23	17	21	22	20	27	30	48	51	43	54
Adamts9	6.90777	0.69527	1.51335e-06	143	186	330	329	405	287	3	1	1	0	0	0	3	2	2	0	0	1				P2ry6	0.382622	-1.63431	0.000356166	969	779	941	503	573	820	485	459	415	144	214	224	499	503	654	1044	780	555
Cnep1r1	-1.39282	0.257405	1.51335e-06	860	922	805	1393	1225	1175	1969	2047	2087	1567	1660	1668	2022	2113	1212	1578	1187	1163				Gcg	0.396435	2.00217	0.000370303	0	0	0	0	0	0	1277	1032	1947	992	571	599	413	688	3259	45	78	95
Oat-rs1	-1.50026	0.254349	1.52988e-06	134	128	167	117	113	119	1724	1947	2112	1499	1377	1649	163	300	1135	94	76	73				Enpep	0.892518	6.0796	0.000371287	0	0	0	0	0	0	970	942	1235	10756	10657	9343	98	388	2765	20	17	8
Irx2	5.64872	0.704469	1.54051e-06	406	505	1506	91	65	901	2	15	20	6	10	9	13	46	53	0	0	0				Ybx2	0.403631	-1.73437	0.000371367	164	178	160	91	65	73	281	268	224	131	159	144	162	123	258	622	489	266
Zfp383	2.08763	0.381214	1.54544e-06	239	219	236	125	138	180	116	130	115	53	64	60	59	92	108	101	113	73				Gpr157	0.434151	2.23013	0.000373496	75	63	39	28	33	27	159	190	157	71	105	152	14	19	23	23	11	23
Aprt	-1.14934	0.213806	1.57363e-06	2962	2967	2837	3595	4198	3524	3812	4505	4302	4730	5530	5506	6260	5828	4066	7734	6135	6662				Clca3a1	0.60787	2.98567	0.000374321	18	31	16	59	102	99	1324	1084	1328	276	406	464	540	554	451	84	73	101
Gng7	2.62722	0.464568	1.57932e-06	308	282	160	127	117	173	101	102	93	29	37	52	54	48	87	32	37	32				Mast3	0.337187	1.50701	0.000378695	1504	1501	1370	1062	1253	1255	2434	2151	1671	3459	3605	3813	921	1028	1023	1256	1101	1006
Rarg	2.80277	0.460687	1.57977e-06	2788	2585	2418	1885	2425	2627	250	322	169	454	526	484	725	504	959	1446	1476	1356				Fggy	0.424797	-1.74445	0.00038023	662	547	528	278	377	594	262	326	299	95	92	102	155	172	262	389	398	487
Cxcl5	9.50375	0.810013	1.58668e-06	6754	5625	3556	328	1631	6269	0	0	0	0	0	2	17	26	1	216	117	57				Snx33	0.285458	-1.22479	0.000380986	1531	1471	1163	967	1020	1049	300	342	344	180	196	181	617	523	449	694	604	575
Gm44250	1.64585	0.308759	1.61137e-06	1210	1195	936	706	635	738	793	903	880	436	496	614	734	587	1363	1021	1129	1325				Plxnd1	0.346109	1.60468	0.000382199	887	743	738	595	1113	901	176	265	164	164	167	162	125	85	129	40	51	81
C87977	-7.1281	0.884597	1.61243e-06	0	0	0	0	0	0	13	18	14	199	235	256	12	12	11	5	6	5				Camk1d	0.28625	1.25382	0.000382415	866	752	772	701	894	969	5571	5597	5497	4255	4884	5527	4624	6472	6587	3051	2212	1062
Reep6	-2.04646	0.358275	1.61289e-06	1418	1531	1878	1695	1987	1813	5957	5536	4884	7836	8259	9525	1832	2173	2293	1312	947	842				Fer1l4	0.565013	-2.95321	0.000383036	6545	7487	4093	3240	3450	4026	25	32	13	80	125	90	248	205	129	926	1043	734
Scarb1	-1.86381	0.340561	1.64512e-06	2290	2317	3180	2909	3266	3080	5239	5346	4334	8187	4496	7972	1198	1003	598	2957	2581	2299				Slfn4	0.694868	-3.40704	0.000385461	46	86	13	6	11	3	52	28	14	21	13	49	53	24	68	377	334	251
Pla2g2f	-4.83038	0.648141	1.65017e-06	1	0	0	9	4	1	230	194	230	248	218	250	52	151	358	75	56	24				Tmem191c	0.302294	1.36019	0.000386029	252	200	224	206	161	193	387	420	362	181	205	240	163	174	153	108	107	99
Cluh	-1.02621	0.188057	1.67599e-06	5231	5630	4465	4052	4774	4637	14341	13655	13371	8663	10037	12219	7317	9866	8163	7981	6762	7012				Mapk15	0.572628	-2.25129	0.000397804	233	261	144	72	71	138	23	24	21	2	8	8	7	22	22	76	56	25
Chpf2	1.89018	0.334958	1.7195e-06	2412	2137	1634	1680	1624	1423	694	759	656	344	386	465	496	563	393	485	472	396				Gm9240	0.281069	-1.22335	0.000404007	58	51	68	63	62	78	46	67	48	50	53	61	30	33	47	137	114	108
4930550C14Rik	4.28466	0.636663	1.74169e-06	64	70	65	32	35	89	6	4	6	4	2	1	14	8	23	4	0	12				Mfsd4b2	0.821895	5.56074	0.000416345	0	0	0	0	0	0	85	127	143	251	202	268	1	2	19	0	3	0
Clca4c-ps	-6.37887	0.726112	1.762e-06	1	6	3	0	1	0	158	125	169	836	871	691	180	108	435	320	332	374				Tstd1	0.360296	-1.54149	0.000420974	41	66	46	34	68	25	1454	1802	1756	1007	1383	1560	299	737	1365	3314	2448	1615
Mcub	3.793	0.618364	1.77425e-06	244	216	129	107	98	111	51	38	45	5	8	3	9	9	28	11	6	17				Aldh1a1	0.60926	2.83005	0.000423561	3575	3464	3983	5444	6416	5629	874	1195	1046	4848	6020	5302	1358	722	438	254	701	1129
Ptk7	2.9051	0.476658	1.77916e-06	4821	4259	4433	3503	6376	5892	928	1125	880	292	355	368	2129	2169	1674	1516	1285	1386				Tifa	0.363209	-1.58219	0.000428825	346	307	240	368	393	345	420	482	829	331	350	429	1281	1522	1900	727	1189	1561
9530068E07Rik	1.22664	0.224871	1.80219e-06	7132	6608	6866	6078	8849	8905	3702	3948	3420	2582	2619	2897	4176	4005	3711	4743	4390	3990				Reck	0.928344	4.91435	0.000430636	63	49	37	24	39	54	7	1	3	50	36	53	3	2	3	0	0	0
Nat8f5	-7.91126	0.854796	1.83872e-06	0	0	0	0	0	0	71	96	107	506	353	369	0	4	3	0	0	2				Gm8834	0.558613	2.80084	0.000430881	660	875	545	630	323	368	815	654	444	1862	2408	2378	162	189	195	288	223	139
Ccne2	-2.04357	0.376321	1.9092e-06	129	177	224	301	353	278	484	499	647	483	483	577	583	929	331	846	734	712				Rgs5	0.879504	3.99793	0.000433536	113	27	56	134	709	759	6	5	1	15	29	14	21	15	5	1	0	0
Erich2os	3.71621	0.56515	1.91629e-06	109	89	150	92	69	82	12	14	12	5	9	6	6	10	10	7	6	27				Tap2	0.246596	-1.03107	0.000433536	1003	1006	762	654	799	853	357	431	494	504	417	474	529	431	752	686	771	817
Tmem237	-2.05107	0.338537	1.94051e-06	263	317	206	196	206	210	4557	5481	2684	2893	2343	2869	551	437	1920	169	145	137				Zfp711	0.897357	4.29222	0.000433536	8	7	1	7	8	6	37	15	36	14	20	19	5	8	27	0	0	0
Lrpap1	2.1608	0.388278	1.94211e-06	5177	5311	4121	2535	2755	4017	1699	1925	1992	779	906	1057	1108	1321	1241	1287	1332	1217				Ptpn13	0.585154	-3.91595	0.000434849	8851	7958	8853	5471	8742	9812	8	17	15	3	11	6	6	10	1	1148	207	129
Rusc2	2.87927	0.447322	1.94789e-06	1118	890	1119	855	1194	1168	61	52	31	71	79	61	533	139	147	908	710	483				Slc7a5	0.351325	1.44948	0.000438732	2303	2472	5886	6528	5374	4182	2623	2425	2495	2030	2286	2669	5264	5661	2047	2079	1621	1518
Ehd2	1.82802	0.30925	1.95567e-06	1076	1046	893	1455	2172	1696	114	152	142	126	171	117	1606	1194	500	853	593	556				Gm47863	0.548925	-2.58779	0.00044057	39	35	12	19	24	37	3	7	9	11	9	4	59	19	61	56	42	46
E230025N22Rik	3.41256	0.568081	1.96255e-06	90	104	68	38	37	46	19	19	6	4	2	6	22	16	27	78	84	84				Dgka	0.31614	-1.41803	0.000442509	2933	2765	2053	2374	2561	2629	1273	1242	1196	2113	2168	1972	3416	2555	2696	7381	5597	5015
Plagl1	3.20465	0.516191	1.96255e-06	673	825	1115	520	627	652	107	121	186	30	48	60	621	563	484	28	30	32				Ppef1	0.635372	2.65344	0.000443046	4	3	5	18	19	19	139	131	43	59	51	88	84	21	11	19	35	8
Trim31	-5.53368	0.65393	1.99409e-06	16	50	21	41	6	0	1532	1567	1523	2972	3242	3089	949	1117	2179	3375	2814	2428				Dync1i1	0.730907	-4.33844	0.000445555	0	0	2	0	1	1	1	0	1	1	2	1	4	1	5	38	34	18
Nlrp9b	-7.3186	0.796473	2.02057e-06	0	0	3	0	0	0	115	127	105	1022	887	874	206	111	323	1324	1186	1272				Ccpg1os	0.260444	-1.05386	0.000446668	406	377	321	297	243	307	206	244	199	106	112	125	114	93	202	234	208	199
Fads6	2.9672	0.489513	2.03818e-06	659	602	478	424	474	524	128	141	148	34	46	74	55	52	60	29	9	25				D430001F17Rik	0.749533	-3.94825	0.000446668	18	21	1	8	1	0	12	8	1	5	8	7	26	12	28	132	147	140
Gprin3	-1.77369	0.317151	2.04862e-06	516	490	653	802	742	595	2033	2129	3091	2113	2004	2188	1403	1477	1541	1551	1057	857				Runx1	0.23566	-1.01787	0.000446668	2471	2811	2627	2356	2719	2579	699	769	516	416	497	429	1350	1080	712	1796	1367	1504
Cfap45	5.34946	0.597762	2.0712e-06	208	166	208	260	315	242	2	2	1	0	6	2	5	3	3	0	0	3				Hspa5	0.290852	1.19867	0.000447088	33109	32227	45916	55906	48059	41062	17243	18182	19462	28245	31696	30104	50959	30212	18428	23158	21198	19152
Prmt2	1.61172	0.290429	2.08177e-06	945	897	645	584	827	820	244	252	197	253	293	261	327	241	294	574	439	387				Rarg	0.412741	-1.84069	0.000447088	2788	2585	2418	1885	2425	2627	250	322	169	454	526	484	725	504	959	1446	1476	1356
Frat2	-2.53082	0.410742	2.08555e-06	125	92	50	115	70	39	1117	1195	1282	581	753	779	441	446	751	460	416	380				Akt3	0.548739	-2.16383	0.00044856	1274	1066	1538	727	1068	1095	2	3	4	2	2	1	7	3	9	9	11	13
Zfp563	1.62108	0.309274	2.09573e-06	142	153	132	96	97	123	116	146	138	74	50	94	63	81	143	93	115	99				Gsto2	0.408074	-1.78296	0.000448832	96	77	82	58	69	59	15	17	16	18	15	12	13	4	18	62	29	47
Arl4c	3.10597	0.441195	2.10383e-06	4919	3910	4214	4276	8920	7233	110	180	137	76	122	84	1502	999	142	446	202	167				Cd200	0.82706	4.9265	0.000450204	0	2	0	0	0	0	174	147	175	23	39	38	43	96	131	1	1	0
D16Ertd472e	4.2299	0.59255	2.13804e-06	301	323	244	267	345	284	35	41	55	10	6	11	0	4	4	7	17	2				Phgdh	0.327761	1.35614	0.00045092	608	547	681	1109	1649	1128	731	707	585	581	641	729	1237	1256	601	589	415	442
Pkig	-1.23622	0.226851	2.14817e-06	436	482	407	460	538	438	1192	1240	1037	1246	1298	1375	784	996	1025	1062	954	1062				Cyp2r1	0.82295	4.42908	0.000455155	62	58	18	40	53	54	51	43	42	18	15	7	16	8	15	0	0	1
Rybp	-1.1316	0.211573	2.15037e-06	274	291	283	288	333	303	414	468	522	549	547	564	567	661	467	659	543	592				Smoc2	0.6091	3.24591	0.000463929	195	143	810	1656	991	934	15790	16948	17632	7371	7574	9693	2497	4973	7070	886	900	723
Wnt5a	6.51837	0.695667	2.15145e-06	878	931	540	48	148	438	3	6	3	3	1	2	3	7	1	0	0	0				Cat	0.265682	1.16335	0.000471041	3533	3263	2560	5227	3973	3277	11693	12511	11700	10201	10878	11661	3203	3234	5013	4399	4672	4189
Slc39a14	-2.08929	0.360249	2.17429e-06	1537	1646	2024	1982	1597	1276	7873	8820	7688	11436	10906	11921	3027	2886	4653	2168	2502	2082				Itga7	0.646243	-2.81878	0.000479021	1478	1616	604	231	149	229	169	224	85	272	249	333	75	29	232	844	1403	1473
Aox1	8.27091	0.795394	2.23828e-06	604	566	401	411	293	364	0	0	0	1	0	0	8	4	0	0	0	0				Cadm4	0.396039	-1.71295	0.000479396	922	1060	709	372	734	849	26	35	35	41	56	63	108	101	124	138	149	163
Ugt8a	5.9413	0.70046	2.24026e-06	194	187	357	304	255	239	5	3	6	1	1	0	2	0	4	8	98	4				Ugt2b37	0.911591	5.07253	0.000480813	0	0	0	0	0	0	12	11	16	20	32	36	0	0	0	0	0	1
Runx2	4.97285	0.603922	2.32343e-06	984	903	1373	552	1243	1580	0	1	2	15	17	8	501	251	62	33	30	35				Fam110b	0.589277	3.13989	0.000482215	53	54	22	20	31	21	131	148	161	39	39	43	35	42	104	5	3	4
BC016579	-1.41199	0.262379	2.39134e-06	198	215	138	208	185	146	348	393	420	319	327	339	1109	754	595	1101	890	699				Gstm3	0.582941	2.97019	0.000482215	264	434	335	402	178	204	1342	1027	667	3149	4285	4420	144	166	231	375	325	196
Spats2l	2.79091	0.46233	2.39134e-06	606	671	843	1211	944	724	106	131	222	92	93	67	439	319	417	247	124	149				Fmo1	0.620888	3.19376	0.000482585	0	0	0	0	1	0	59	81	34	46	56	61	7	5	23	3	4	2
Scara3	7.15432	0.761017	2.4004e-06	20043	17189	11511	3493	9672	16487	47	78	63	0	5	6	102	100	59	25	11	1				Dpysl3	0.669248	-3.92107	0.00048541	63	76	131	261	934	510	33	52	76	104	185	107	842	782	944	3007	2401	2704
Neurod1	-5.30734	0.741361	2.42042e-06	0	1	1	0	0	1	242	214	264	82	70	74	22	59	131	8	7	3				Ros1	0.733672	4.08826	0.00048541	19	24	24	15	11	9	108	121	79	18	23	41	4	8	2	6	1	0
Bckdha	1.41522	0.267844	2.43756e-06	2759	2657	2441	1568	1824	2034	1820	2016	1850	1146	1042	1218	1033	1169	1540	1760	1592	1248				2010106E10Rik	0.888773	6.39289	0.000488304	0	0	0	0	0	0	1115	1570	1643	5826	4111	4241	7	72	633	7	10	0
Tmem158	3.28158	0.512713	2.45117e-06	735	745	469	445	276	327	45	56	40	37	36	45	181	76	84	45	71	110				Gm38655	0.898873	4.62318	0.000499553	17	36	12	16	11	17	33	27	36	11	13	14	2	4	3	0	0	0
Cfap43	1.84123	0.327281	2.46766e-06	730	620	482	549	524	486	142	167	182	81	98	132	324	351	200	436	296	364				Parp3	0.305492	-1.31841	0.000501298	1346	1354	646	939	1361	1150	319	325	370	365	484	396	740	564	740	1249	1060	881
Lgals2	-4.64992	0.603575	2.46766e-06	275	798	172	740	108	96	36938	28551	24096	19095	23139	25194	9069	13186	22264	23	37	25				Defa3	0.924858	5.42655	0.000501782	0	0	0	0	0	0	14	27	41	192	122	183	18	40	101	0	1	0
Clec2f	4.7429	0.658064	2.5011e-06	23	65	358	114	116	133	7	11	8	5	5	5	1	2	11	2	6	8				Gm20712	0.341676	1.46839	0.000503202	28	18	33	31	29	24	54	64	57	48	65	70	33	46	26	21	32	29
Pbxip1	1.67254	0.314073	2.50633e-06	4160	3653	3369	1493	2271	3082	2070	2165	1831	1409	1451	1688	1305	1363	2124	2091	2089	1899				Hoxb3	0.577898	-3.51778	0.000503473	0	0	0	0	0	0	29	22	42	19	42	19	905	880	270	195	369	943
Sephs2	-1.87698	0.346332	2.5076e-06	2935	3086	2919	4676	4730	4215	6782	7771	6048	10208	10455	11403	7269	8562	5455	3603	3016	3174				Trpm2	0.657313	3.27999	0.000506787	17	7	12	21	3	15	46	45	47	42	37	34	18	26	85	3	0	2
Mfhas1	3.38775	0.520439	2.50842e-06	643	729	683	590	858	722	33	26	41	63	59	53	465	175	284	222	495	707				Gm26641	0.39903	-1.80225	0.000520668	13	9	11	9	8	9	35	27	27	17	12	24	27	15	29	97	68	55
Ppp1ccb	-1.00716	0.188763	2.50842e-06	617	650	704	729	783	684	1249	1403	1367	1374	1366	1554	951	1192	1053	1245	1049	1012				Lipn	0.95868	4.43516	0.000521736	0	0	0	0	0	0	8	5	7	12	7	11	9	2	2	0	0	0
Tmem147os	1.84677	0.339353	2.51163e-06	267	261	228	137	147	149	113	104	89	63	82	80	57	64	75	79	67	67				Vopp1	0.288997	-1.24051	0.000521889	4036	3725	3991	2469	2838	3387	808	1007	961	1185	1437	1253	2724	2185	2465	3376	2936	2783
Gm27149	-6.06255	0.828365	2.56812e-06	0	0	0	0	0	0	400	340	417	69	60	124	11	23	135	44	25	40				Tkt	0.241902	1.00951	0.000528295	22871	24853	31625	34053	29528	28026	35537	39568	32373	44109	48075	50175	40997	42979	35257	29867	26756	25054
Sox13	1.77691	0.330145	2.57689e-06	1304	1446	1223	1109	1652	1568	820	902	847	437	469	434	1133	1212	1652	1180	1085	1413				Chrm3	0.573945	4.17162	0.000530017	310	317	428	211	153	165	480	594	847	170	126	218	0	9	41	2	8	3
Lifr	7.11461	0.694206	2.58346e-06	827	828	1142	428	836	941	1	0	3	1	0	1	19	15	0	94	83	183				Cyb5r2	0.798702	4.21931	0.000530927	5	10	8	4	7	0	76	64	47	12	18	23	21	13	13	2	0	1
Serpinb8	5.63188	0.680284	2.59297e-06	278	297	404	324	366	438	0	0	0	0	3	1	59	20	2	87	62	52				Neto2	0.378995	-1.81692	0.000533045	211	184	161	222	350	258	182	181	244	286	283	314	658	671	346	935	1288	2092
Tmem121	4.19889	0.638308	2.60202e-06	58	28	67	61	66	61	7	14	4	2	3	0	7	5	25	7	2	2				Kpna7	0.945652	5.15419	0.000536471	1	0	0	4	6	1	31	35	17	27	32	28	2	0	6	0	0	0
Bace1	3.63688	0.55165	2.60789e-06	3604	3467	5025	3167	4873	5089	433	482	564	98	159	122	448	278	268	180	195	178				Lama5	0.275781	-1.21954	0.000543691	52503	45036	50005	28077	36590	39042	4146	5274	5267	4097	4776	4988	20281	14349	6539	25615	17733	16699
Creg1	1.67207	0.311301	2.63946e-06	4361	3693	3018	3232	2004	2168	1672	1895	1880	1217	1308	1408	968	1176	1315	722	793	912				Ly6e	0.328589	-1.39323	0.000544874	41763	38375	47386	41608	42149	56847	4867	5533	4410	2840	2501	2827	7515	6931	6153	17100	10687	7527
Prickle1	3.49197	0.536397	2.63968e-06	147	155	104	149	174	128	12	16	16	4	8	4	35	20	21	38	43	10				Pcyt2	0.263108	1.09139	0.000549612	3389	4066	4054	3752	3689	3335	7633	7756	5718	9597	10181	11139	4719	5898	3761	6086	5446	5103
Chn1os3	4.51505	0.615044	2.65416e-06	75	67	86	49	55	78	4	2	4	1	1	0	5	7	2	6	5	4				Ube2e2	0.242039	-1.0024	0.000550283	656	624	737	675	759	828	209	248	220	182	163	187	144	124	159	320	475	360
Fstl3	3.2556	0.525096	2.65416e-06	587	437	626	314	328	412	54	57	17	85	73	78	45	30	79	80	84	73				Zhx3	0.234219	1.02167	0.000550722	243	270	198	214	207	228	881	873	961	463	506	636	151	232	257	299	237	240
Thbd	7.14394	0.756751	2.65416e-06	142	87	112	53	77	132	0	2	0	0	0	0	0	0	0	0	1	0				Gbp3	0.591312	-3.20832	0.000553167	11	8	5	28	18	13	8	3	9	5	1	4	132	69	40	80	56	136
Egfl6	4.85479	0.64642	2.65978e-06	576	618	399	553	314	470	11	36	12	6	3	2	22	26	11	14	29	78				Irx3	0.719064	-4.24019	0.000554597	245	294	463	159	278	925	0	1	1	4	2	4	30	4	7	55	62	213
Dnah7b	3.44519	0.538147	2.66142e-06	210	206	128	72	79	109	5	8	10	5	7	9	217	137	73	80	63	76				Fstl4	0.737291	3.76068	0.000564615	633	701	659	339	618	579	17	13	8	79	94	110	53	134	79	0	4	5
Spns3	-3.86781	0.615055	2.67202e-06	13	19	26	17	22	24	52	80	43	273	274	219	146	49	34	41	24	10				Gm33424	0.853992	-4.45782	0.000566548	19	27	11	9	2	10	0	0	0	0	0	0	0	0	0	6	8	18
Celf3	-3.69004	0.535379	2.70437e-06	6	16	7	4	4	0	364	416	368	143	161	167	57	106	164	116	153	91				Krt83	0.979162	-5.27253	0.000566548	20	12	20	1	0	3	0	1	0	0	0	0	4	1	2	8	40	88
A4gnt	3.74229	0.595948	2.71439e-06	451	471	1103	2325	1610	1215	147	153	229	110	116	149	66	179	420	14	24	6				Slc44a4	0.298769	-1.28204	0.000566548	6133	6588	6300	5421	6632	6761	3429	3808	3348	5262	5698	5389	6343	5073	7245	12462	11735	11661
Cdc7	-1.73433	0.322519	2.71914e-06	196	222	232	293	257	253	613	605	628	433	504	542	699	1098	442	710	676	936				Ctrb1	0.987574	6.97002	0.000572503	3	0	0	2	2	0	105	135	139	1548	1162	1567	0	4	22	0	1	0
Sh3bp4	1.17333	0.220334	2.76371e-06	2912	2950	3020	2344	2745	2951	1642	1848	1666	963	1188	1246	2412	2383	2208	2756	2362	2231				AC127690.2	0.602828	-2.34913	0.000572651	35	40	48	14	12	26	22	18	11	2	2	6	4	2	13	48	32	18
Entpd7	-2.20109	0.405402	2.78384e-06	538	516	582	666	843	662	878	999	977	1921	2100	2131	686	709	384	529	385	359				CT025731.4	0.816394	-6.11819	0.000572651	0	0	1	0	0	0	0	0	0	0	0	2	2	1	1	61	41	76
Nfix	2.01618	0.372765	2.78384e-06	2935	3781	3099	3719	3831	3996	2113	2142	2199	870	861	1176	886	1138	1500	1379	1486	1172				H2-Aa	0.692479	-4.03874	0.000582463	2	3	0	0	0	0	1	2	2	5	4	5	0	1	3	28	44	87
Syt3	3.51157	0.586413	2.78384e-06	195	168	70	37	30	58	21	18	26	26	7	19	9	9	31	8	5	9				Robo2	0.771095	-4.24169	0.000582463	37	6	10	4	20	16	0	1	1	1	2	0	0	0	2	52	19	22
Glul	2.9813	0.542666	2.80546e-06	16779	19050	10439	6674	6619	8956	5158	5409	5874	1120	1300	1488	1391	1547	3019	12225	10003	6101				Ccdc89	0.47189	-2.16441	0.000591171	21	20	18	12	22	20	11	11	6	2	3	4	15	11	12	39	26	28
Gm14085	-4.27276	0.624244	2.8643e-06	5	4	1	0	0	1	159	177	208	91	147	69	17	16	56	0	0	1				Fgfr2	0.40791	-1.52195	0.000595874	2728	3272	2461	2136	1535	1333	2548	2920	2913	760	819	1102	400	662	1305	2789	2804	1922
Lyz2	-5.62422	0.658996	2.8643e-06	3	1	32	9	15	21	2348	3124	2991	3012	2573	3023	971	2006	6047	4	12	0				Akr1b7	0.662071	3.63347	0.000596764	42	74	16	15	9	1	394	526	439	781	646	756	28	12	25	46	28	24
Dock8	-4.43168	0.603726	2.89351e-06	22	15	16	24	86	29	769	900	880	1732	1699	1884	216	422	878	255	277	291				Prap1	0.763839	4.66403	0.000599709	22	207	7	87	30	5	19325	24740	20465	27837	22260	25662	1326	713	3566	142	389	483
Armcx1	2.55655	0.476845	2.90728e-06	294	214	136	147	117	128	130	121	122	58	49	53	33	43	97	6	26	5				Lrrc51	0.304466	-1.22584	0.00060526	368	328	254	222	226	198	301	242	190	173	138	134	110	103	189	388	326	222
Dkk3	6.22744	0.822379	2.90728e-06	178	114	24	17	15	87	0	0	1	0	0	1	5	12	7	1	1	2				Reg1	0.903416	6.57919	0.000607045	5940	5089	1354	70	93	365	15059	23405	25257	3269	1699	5873	68	56	161	0	25	7
Glt8d1	1.22645	0.230363	2.9181e-06	811	723	831	633	619	727	485	416	400	277	306	344	417	390	398	383	325	359				Gfra3	0.543964	2.70809	0.000614661	0	0	0	0	0	0	201	226	299	74	87	87	31	75	89	10	13	11
Glis2	2.20787	0.385114	2.92804e-06	1351	1281	1098	795	1182	1091	255	298	250	133	238	117	784	732	537	848	514	447				St8sia1	0.801774	-3.80416	0.000614661	0	1	0	1	0	1	2	2	0	0	0	1	0	3	7	10	13	13
Itm2b	1.13809	0.216595	2.9578e-06	24493	23470	20294	16655	17376	18554	12406	14283	13780	13278	14362	14082	9382	8244	13255	17152	18058	14672				Fam189a2	0.540488	-2.35797	0.000617515	104	90	46	11	23	17	1188	1431	1553	588	571	670	1399	1261	1834	2681	3383	3798
Nova2	4.00349	0.597521	2.97134e-06	127	195	76	107	214	189	6	17	19	3	5	4	16	16	21	83	37	22				Gm12551	0.638692	-3.51101	0.000617515	21	34	5	5	8	11	8	4	2	13	7	6	73	40	22	90	152	146
Slc37a3	1.13075	0.211801	2.97134e-06	4397	4044	3984	4163	5487	4538	2079	2326	2629	1589	1695	1771	2466	2441	2148	2033	1871	1858				Acsbg1	0.615262	-3.8201	0.000622874	131	123	138	244	486	433	1	0	0	10	15	13	292	145	38	588	289	273
Dcaf15	-1.25814	0.236403	3.02214e-06	1058	1081	910	884	944	900	1734	1763	1469	1947	2216	2344	2362	2316	1866	2769	2457	2325				S100g	0.480225	2.84092	0.000623435	107	111	132	26	109	116	3250	6104	7727	2196	1968	2014	285	292	7255	74	82	101
Nadk2	-1.65203	0.295137	3.02214e-06	1291	1337	1313	1330	1118	1176	8623	9165	8578	4184	4306	5290	2406	2705	3267	1390	1207	1092				Grk3	0.714636	5.14363	0.000624241	826	677	393	292	439	452	1403	1350	1581	104	73	99	21	31	181	3	9	2
Dsp	-1.22796	0.232386	3.08378e-06	9448	10581	11528	12385	11779	9250	15215	16735	17204	19349	20467	20427	33188	27373	22426	40807	30237	35063				Rimkla	0.626085	-2.71493	0.000625938	30	38	16	6	7	10	4	6	7	19	8	6	0	1	6	37	29	62
Wdr35	2.15335	0.382601	3.08777e-06	1384	1476	1147	936	1082	1214	376	377	447	165	175	229	513	464	359	431	389	384				Sec14l2	0.4713	2.16424	0.000628232	327	415	301	397	382	330	698	835	809	2177	2045	2081	422	659	676	341	298	372
Btnl4	-5.12702	0.616304	3.09552e-06	26	38	13	6	0	2	1594	1798	1420	1968	1834	2036	338	404	1364	951	978	1166				Gm2539	0.994007	-5.79849	0.000630241	0	0	0	14	11	8	0	0	0	0	0	0	39	24	30	80	72	58
Gsto2	2.77536	0.471346	3.10022e-06	96	77	82	58	69	59	15	17	16	18	15	12	13	4	18	62	29	47				S100a14	0.49956	-2.66898	0.000630241	3290	3128	2195	5971	6290	4558	555	708	470	1776	2423	1689	12353	7182	4342	23717	17826	15892
Ccnd1	1.43714	0.258606	3.14394e-06	28754	26591	24668	29850	45553	45106	5886	6764	7398	5554	6668	6602	26233	24344	12675	23187	18579	19406				Gulo	0.960984	4.2593	0.000645184	4	2	4	4	14	6	16	17	29	3	1	6	10	3	1	0	0	0
Trim45	1.41425	0.268185	3.25148e-06	257	214	229	192	209	213	137	162	148	84	147	98	130	115	193	206	166	159				Tff1	0.830647	3.99298	0.000648175	24835	45842	6488	11648	20506	9387	8	16	35	8	7	8	8	26	4	0	0	0
Myrip	-4.20036	0.648648	3.25723e-06	3	0	0	2	0	1	120	105	175	45	60	61	46	76	188	8	15	9				Plbd1	0.490251	2.56076	0.000649026	202	342	81	459	246	251	2100	1924	1816	1123	1244	1274	308	479	1301	92	224	94
Ajuba	1.43364	0.256462	3.31532e-06	3823	4095	3798	3599	5908	4910	676	976	751	591	731	640	4256	4094	1545	2726	1857	1862				Rnase1	0.470649	2.42279	0.00065177	0	1	4	0	0	1	1540	1587	2166	518	646	761	24	69	108	61	98	93
Slc25a25	-1.60778	0.303212	3.32896e-06	486	511	417	602	757	634	866	923	946	1213	1280	1441	1722	2098	1289	1044	837	835				Gm10701	0.867621	-4.65647	0.00065207	17	6	21	31	40	21	0	0	0	0	0	0	1	1	2	5	13	30
Wdr19	1.90476	0.350588	3.3602e-06	1114	879	859	557	650	706	358	419	328	189	264	196	379	313	386	620	532	407				Zc3h12d	0.290728	-1.17816	0.000652365	12	13	8	1	4	3	452	508	375	326	378	394	90	153	347	360	450	511
Pcyt2	-1.62887	0.304137	3.37864e-06	3389	4066	4054	3752	3689	3335	7633	7756	5718	9597	10181	11139	4719	5898	3761	6086	5446	5103				Gm14230	0.689273	3.74537	0.000656318	23	11	13	5	19	10	310	296	118	37	33	61	30	35	30	6	3	8
Sema3b	1.14407	0.219365	3.39822e-06	4326	4249	3364	2593	2792	2897	2465	2803	2074	2117	2227	2296	1535	1623	2136	3861	3547	2993				Gm45225	0.814362	4.8379	0.00065991	2	3	0	0	0	0	24	33	13	65	72	52	1	0	0	2	0	1
Tctn1	1.62188	0.296186	3.41168e-06	1276	1292	1070	670	928	969	287	358	347	243	298	277	620	469	392	654	524	447				H19	0.695335	3.09574	0.000662513	18	9	19	18	36	31	6	5	5	9	32	13	15	5	3	6	0	2
Fam167a	3.87648	0.604851	3.44056e-06	92	80	118	77	278	191	12	23	24	7	4	10	14	14	37	12	18	7				Kif5c	0.595862	-2.36368	0.000666919	29	42	25	54	43	40	6	6	5	5	4	1	5	2	26	19	23	7
Nr4a1	2.04696	0.363817	3.47117e-06	652	608	640	775	1191	868	208	209	226	117	136	155	367	376	343	373	291	191				Vwa3b	0.487567	-2.36528	0.00067367	5	14	11	27	8	9	15	14	16	11	19	17	50	21	39	121	97	84
Hnrnpd	-1.02846	0.196691	3.49248e-06	3412	3738	3886	3984	3859	3358	7182	6684	5537	5092	5628	6638	7323	9665	5659	6987	6123	5541				Camk2n1	0.449394	-1.59415	0.00067725	3194	2883	5034	1079	2054	3575	1343	1486	1512	647	499	632	359	427	1988	869	935	1825
Tshz1	-1.24708	0.235391	3.51681e-06	677	712	602	568	682	649	1366	1547	1886	1002	1159	1216	1419	1337	935	2296	2131	1811				Slc24a3	0.83269	-4.17865	0.00067725	12	6	5	0	1	4	2	0	0	0	0	1	12	13	9	23	26	13
Pnp2	-3.33637	0.51292	3.56948e-06	63	73	15	36	40	38	420	406	330	644	716	726	32	32	39	880	790	826				Cyp4b1	0.622461	4.15841	0.000677389	21	31	10	1	0	1	1107	1160	1117	878	691	599	12	41	237	15	9	10
Chga	-4.99106	0.584901	3.63807e-06	19	17	6	3	1	0	3244	3794	5436	1303	978	1399	111	282	1705	138	185	93				Gkap1	0.599171	3.26324	0.000681865	118	54	64	33	57	43	185	163	218	49	42	55	31	31	60	4	10	3
Gpsm2	-1.5505	0.289314	3.63807e-06	1106	1367	1533	2038	1697	1628	3545	3745	3383	3907	4194	4669	2925	3336	2842	3822	3353	3555				Stab1	0.848619	3.27487	0.000683034	71	42	68	125	292	358	59	158	5	10	15	11	38	15	2	12	1	0
Plekhg5	1.59518	0.300054	3.63807e-06	962	918	749	654	681	677	507	475	436	227	249	340	514	590	604	277	207	177				Lix1l	0.619157	-3.36845	0.000696218	59	56	116	147	216	230	4	2	1	1	6	1	35	27	14	143	49	38
Serpinb1a	-2.48143	0.418588	3.63807e-06	1946	2226	1301	1342	1004	1052	8902	9856	8623	12767	15733	11677	7669	5633	9722	7090	6080	5504				Mcam	0.48484	1.94172	0.000708829	706	393	694	386	766	698	26	38	54	22	55	47	429	216	70	53	22	6
A530084C06Rik	-1.95985	0.363107	3.70688e-06	20	24	41	33	40	29	101	111	97	73	79	62	118	109	65	86	61	69				Tfpi	0.735899	4.17634	0.00071124	1	0	3	0	4	1	358	397	416	46	43	89	470	815	1176	1	3	8
Slc25a28	-1.27657	0.241115	3.73891e-06	659	697	609	562	519	652	1260	1233	1118	1333	1598	1564	730	819	659	934	778	758				Gm12892	0.667921	2.97931	0.000732984	27	30	52	208	298	173	1029	1068	856	3783	3640	3914	317	509	353	379	365	290
Rasgrf2	-3.7263	0.57779	3.76269e-06	37	68	48	263	59	61	1349	1435	1348	1416	1440	1411	760	727	725	15	29	20				Grasp	0.250205	-1.02378	0.000738141	2423	2396	1758	1337	1735	1658	456	551	465	283	380	406	886	850	714	1189	800	793
Gatm	2.47014	0.425346	3.78291e-06	252	289	379	432	374	542	78	88	57	37	65	57	71	53	63	242	339	258				Gm11127	0.791164	5.9371	0.00074199	0	2	0	0	0	0	95	86	104	244	177	192	0	0	2	1	1	1
Fanca	-1.64374	0.318993	3.80271e-06	404	517	655	829	969	830	933	872	836	910	1066	1205	1659	2193	817	1646	1283	1302				Slc6a12	0.750754	-5.66285	0.00074389	3	5	0	2	0	0	0	0	3	2	0	2	0	0	0	148	114	75
Ubxn10	2.60452	0.549109	3.80271e-06	57	68	32	23	44	28	81	86	25	18	14	17	16	41	213	26	31	44				Abcb9	0.500608	2.41913	0.000748926	601	736	444	1682	811	756	413	516	512	833	823	888	108	155	203	113	178	82
Mycbpap	2.02287	0.365443	3.82322e-06	649	646	463	442	447	468	161	184	136	139	146	127	227	119	196	173	224	107				2010110G14Rik	0.909438	4.93605	0.000754014	0	0	0	0	0	0	15	15	10	23	28	22	0	0	0	0	0	1
Slc26a6	-3.76968	0.52378	3.83326e-06	100	94	93	96	128	140	4071	4988	4209	8117	7173	8083	149	271	1604	96	134	104				Lurap1	0.324526	1.42054	0.000757432	376	333	378	264	270	308	106	92	108	54	42	64	86	86	148	21	21	14
Boc	2.8205	0.557796	3.84622e-06	175	134	68	29	29	26	34	43	36	45	27	31	64	115	423	472	914	1240				Cyp2c23	0.698341	4.5919	0.000757746	795	825	527	808	711	491	18	32	37	57	46	79	0	0	3	3	1	0
Cyp3a11	-6.7339	0.742111	3.86752e-06	0	1	0	3	0	1	1072	1339	1036	1997	1430	1341	3	11	267	0	0	0				Tmem211	0.684613	-4.09651	0.000760794	3	4	4	2	2	3	2	7	0	6	2	3	1	2	2	22	56	136
Vwa5b2	-5.5071	0.709567	3.88467e-06	0	2	0	1	4	1	452	360	444	81	100	141	19	101	90	11	14	10				Asap1	0.244967	-1.03916	0.000762886	1385	1278	1425	1136	1537	1559	598	623	511	820	767	641	1712	1134	980	2286	1857	1964
Fcna	2.21618	0.439013	3.92332e-06	82	91	39	60	42	43	54	86	90	42	42	37	48	33	240	29	56	33				Plekho2	0.496057	2.24337	0.000768838	51	32	56	33	55	49	74	90	66	190	175	172	33	36	33	39	43	17
Gp1bb	-4.9688	0.832444	3.9776e-06	0	1	0	0	0	0	19	17	14	19	31	45	19	36	37	4	4	6				Wfdc18	0.805131	-5.25254	0.000769874	81	69	232	180	444	312	0	0	0	0	1	0	2	7	1	46	76	53
A630076J17Rik	8.32802	0.765981	3.98214e-06	430	262	203	60	226	324	0	0	0	0	0	1	0	0	0	0	0	0				Ccdc69	0.500926	2.06351	0.000776446	21	20	30	47	63	66	50	49	31	72	73	87	63	80	38	36	28	11
Mpzl1	1.46295	0.273379	3.98893e-06	4902	4763	7003	6092	6845	6983	2725	2950	2500	1702	1901	2112	2851	3111	2816	3159	3062	2660				Cebpb	0.373231	1.56482	0.000804641	669	701	671	670	1031	829	244	396	431	512	693	781	648	568	445	215	246	281
Cpn1	2.57682	0.452432	3.99461e-06	2915	2800	3560	1817	1944	2272	885	982	823	351	309	504	180	341	233	38	27	27				Acot12	0.930946	5.07634	0.000805171	0	0	0	0	0	0	20	21	6	41	54	33	4	0	2	1	0	0
Zdhhc14	-1.77252	0.323434	3.99461e-06	62	48	71	35	50	55	184	192	218	198	213	202	348	354	379	784	460	386				Cdip1	0.245288	1.01378	0.000805859	2373	2213	1502	1189	1525	1567	2712	2502	2858	1915	2108	2354	1659	1648	1240	1536	1178	1174
Ttc26	1.9942	0.358329	4.03961e-06	612	631	484	379	377	485	116	125	171	85	88	132	252	244	180	209	149	98				Gal3st2	0.685076	4.1384	0.000819314	3	0	3	5	2	1	204	258	179	677	591	637	7	17	116	6	7	15
Emp2	1.0522	0.198173	4.07134e-06	8591	8044	8242	9746	8136	7667	2751	2979	2475	2772	2865	3247	8611	6249	5190	11524	8257	7698				Nckap5	0.600375	3.26824	0.000828921	97	78	94	32	52	62	248	275	304	1021	856	797	81	50	304	28	30	46
Gm44101	-5.34664	0.845163	4.07715e-06	0	0	0	0	0	0	18	13	7	28	25	23	10	11	11	4	1	5				Gm47583	0.54654	-2.65351	0.000834604	17	13	13	7	15	15	42	23	22	5	5	11	28	26	17	148	132	104
Lrrc8c	3.82376	0.529972	4.07715e-06	477	321	722	601	1621	1334	13	11	9	13	26	15	189	119	45	141	100	56				Mitf	0.554225	-2.22516	0.000846159	25	30	11	11	11	11	13	4	7	5	2	3	9	11	20	24	22	12
Lrrc74b	3.74368	0.617162	4.09284e-06	92	88	76	28	16	21	27	29	17	2	5	3	0	2	7	0	0	0				Fzd4	0.364828	1.69377	0.000851954	1242	1189	1799	920	748	1052	232	281	246	315	284	382	49	45	81	79	67	76
Neurl1b	-2.80971	0.481196	4.14473e-06	182	204	337	276	225	270	873	918	840	2085	1894	2038	712	1028	750	1296	922	975				Gm21049	0.917813	5.24696	0.000863381	0	0	0	0	0	0	15	14	22	21	18	16	0	1	0	0	0	0
Rab29	1.09638	0.210496	4.19275e-06	389	371	272	362	349	365	174	233	221	167	195	217	221	254	270	316	325	336				Slc16a2	0.769605	4.22425	0.000863381	843	796	895	543	822	911	52	41	54	9	10	7	9	21	7	1	0	1
Rundc3b	-3.37524	0.528645	4.21773e-06	71	58	249	50	137	128	1243	1218	1270	1731	1765	1820	1412	1759	1993	1980	1731	1652				Fut9	0.872451	-6.07447	0.000874245	477	508	646	148	165	300	0	0	0	0	0	0	5	0	0	172	108	17
Tap2	1.50027	0.285775	4.24164e-06	1003	1006	762	654	799	853	357	431	494	504	417	474	529	431	752	686	771	817				Sema5a	0.636021	-1.65077	0.000877258	359	395	353	867	1418	1369	2228	2243	2579	619	765	866	1	1	57	1096	3002	3386
Tmprss7	-4.30174	0.705157	4.27797e-06	1	1	0	1	1	0	32	37	28	19	12	12	69	37	42	98	64	62				Pla2g3	0.509824	-2.05534	0.00087804	9	8	4	3	4	7	25	31	24	15	9	10	3	11	17	41	70	22
Slc16a6	-2.34535	0.438437	4.32104e-06	402	386	702	1125	1120	911	1400	1460	1612	2263	2357	2653	2033	1789	1063	633	472	464				Diaph2	0.25045	-1.01328	0.000899104	1312	1293	1146	1193	1089	1177	830	871	991	456	542	563	1428	1149	1251	1541	1202	1460
Arhgef17	2.06619	0.366651	4.35462e-06	2975	2752	4242	2493	4079	3870	720	1015	499	511	614	631	2003	1414	1414	1857	1161	946				Clmp	0.494986	-3.09603	0.00089926	16	8	12	32	38	38	17	13	10	35	33	18	39	15	9	515	463	430
Ikzf2	4.46798	0.637028	4.38734e-06	426	337	324	117	131	250	14	7	19	0	6	2	100	51	39	146	141	176				Ankdd1b	0.692359	-3.56402	0.00090046	110	247	68	201	60	54	5	5	4	1	0	2	2	4	2	133	40	19
Apoc3	-9.05793	0.902325	4.40416e-06	0	0	0	0	0	0	462	496	422	3314	2625	2348	6	14	68	0	0	0				5930412G12Rik	0.953429	-5.19801	0.0009064	1	4	2	0	1	3	0	0	0	0	0	0	2	1	2	5	10	54
Hipk2	-1.5908	0.296837	4.42594e-06	1136	1283	1198	1465	2158	1522	3811	4302	5110	4014	4192	4548	2157	2668	2381	1819	1750	2097				Defa35	0.807659	4.58565	0.000910008	0	0	0	0	0	0	56	82	121	135	90	126	14	26	284	0	1	1
Tmem200a	5.20931	0.663021	4.4619e-06	431	421	256	345	298	365	7	4	15	3	0	3	33	11	11	2	7	26				Wnt4	0.876404	4.55107	0.000911873	223	203	110	4	53	112	21	52	50	25	15	20	9	2	1	1	0	0
Tctn2	1.78191	0.326183	4.47956e-06	948	940	788	552	852	732	259	290	279	162	154	190	370	303	237	413	362	263				Creb3l2	0.368662	1.58846	0.000923979	4377	4146	6557	4653	5414	5515	1345	1412	1209	2321	2248	2206	980	796	973	1069	685	509
Tmeff1	3.6991	0.568033	4.49962e-06	1511	1297	1290	1799	2537	2179	153	223	112	26	58	37	1104	929	707	1469	1360	1033				Podn	0.768672	3.74882	0.000923979	8	7	17	11	19	22	11	8	14	38	31	35	5	10	10	3	0	1
Ypel4	5.31554	0.676366	4.5051e-06	195	173	101	42	44	51	1	2	2	2	4	1	3	6	3	0	1	1				Rbbp8nl	0.309162	1.29729	0.000926718	460	543	398	528	585	587	230	282	224	162	129	160	220	256	180	118	104	57
Igfbp5	5.05516	0.688733	4.51498e-06	443	355	310	30	43	39	8	16	7	3	3	5	6	6	9	0	1	0				A030001D20Rik	0.522645	-2.26226	0.000932722	104	125	116	42	65	85	13	12	14	6	4	5	10	10	7	33	70	29
Rgs16	3.39643	0.652492	4.57911e-06	87	47	81	24	70	75	27	30	42	1	4	5	6	23	81	3	7	13				Aif1l	0.818913	4.25415	0.000937416	84	87	58	64	338	203	58	50	26	7	15	7	14	14	9	1	0	1
Pcdhb17	3.29252	0.551924	4.62253e-06	85	75	56	21	84	60	9	8	12	3	11	9	15	27	33	17	16	6				Rtl5	0.556942	2.85219	0.000937439	354	255	109	61	84	159	160	143	79	88	77	67	40	38	62	8	6	11
5730409E04Rik	5.25471	0.717516	4.67213e-06	116	109	31	29	64	72	3	1	1	1	0	0	13	3	6	9	18	19				Ggt7	0.685289	3.60772	0.000950052	8	3	14	9	2	6	115	127	48	161	94	144	13	39	40	3	14	0
Lpar5	-2.11553	0.375201	4.74831e-06	97	165	102	189	105	104	680	697	546	668	744	831	330	369	483	534	361	313				Galnt6	0.418928	1.98655	0.000955843	7667	8351	7639	5955	3465	4358	6074	6755	4797	9107	9602	9813	2622	2747	6623	1461	1691	890
Gcnt3	2.00265	0.372335	5.07672e-06	16221	19166	11368	16066	16357	15475	5331	5653	4988	6816	6989	6179	5923	5733	11020	3063	3589	5378				Gm19680	0.307615	1.2377	0.000962197	607	598	575	1081	1238	874	459	541	333	440	496	532	630	469	361	336	304	305
Tnfsf10	-3.39183	0.484795	5.15692e-06	27	24	17	18	8	17	1683	1725	2887	643	521	716	155	234	1034	41	70	45				Tbc1d19	0.578339	2.96616	0.000962197	925	849	685	442	596	696	157	180	193	31	32	50	72	63	50	11	11	10
Tnfsf9	1.83738	0.337499	5.24366e-06	563	501	782	566	716	669	205	174	118	168	173	221	186	178	194	242	272	304				Gm4768	0.550782	2.52466	0.000965601	14	23	16	19	18	18	39	39	42	118	106	101	24	31	30	8	15	17
Rhoj	7.75021	0.766145	5.30197e-06	206	154	175	265	325	337	0	0	0	0	0	0	3	0	1	0	1	0				Tox	0.460855	2.37443	0.000972193	417	451	274	191	140	145	1568	1347	1433	616	594	737	422	586	1042	58	59	162
Ces2a	-6.33696	0.64064	5.3782e-06	27	75	3	5	2	3	27070	22295	16260	10496	11906	9838	309	519	6051	543	900	891				Cyb5r3	0.315878	1.28914	0.000972906	6989	7313	6842	7823	9350	8211	7996	8588	6797	13827	13047	14237	4601	4301	3848	6933	5772	5391
Hilpda	2.31088	0.399586	5.39843e-06	1252	1046	1468	2114	2351	1861	168	223	170	229	266	255	378	197	258	1031	868	901				2610528A11Rik	0.616228	-3.21317	0.000975549	2	7	14	15	12	0	2692	2846	1226	4272	4609	3926	4215	2103	9498	21115	30146	25850
1810043G02Rik	1.74925	0.325364	5.42838e-06	625	617	457	472	413	479	201	240	193	116	119	139	184	145	138	264	182	214				Gm8532	0.283704	-1.26959	0.000976591	29	35	36	38	41	31	44	29	45	33	40	29	66	68	30	195	140	120
Ccdc103	3.10379	0.512526	5.43412e-06	86	78	59	41	53	85	11	8	14	9	4	10	6	13	8	15	15	14				Pbld2	0.509037	2.78052	0.00101482	334	466	238	129	71	100	1009	1156	925	1486	1537	1666	34	61	194	81	103	76
Tnik	-2.34078	0.405643	5.50361e-06	429	529	378	374	248	253	1884	1958	2002	2896	3127	3169	1771	1991	2616	2296	1808	1634				Dna2	0.344297	1.34561	0.00101498	219	291	459	492	627	508	1645	1566	1648	1157	1236	1456	1268	2006	842	976	841	783
Spata6	3.35652	0.475335	5.50989e-06	1621	1575	1246	1471	1638	1379	21	56	22	27	82	29	100	45	14	746	650	625				Fabp5	0.460925	2.11804	0.00103556	1339	2010	1436	777	940	693	188	320	259	452	399	443	103	208	118	74	92	86
Zmat1	3.02962	0.550845	5.60001e-06	148	117	65	48	49	69	15	38	64	24	11	20	6	10	27	18	8	15				Sgf29	0.313904	-1.2775	0.00103747	409	535	399	437	492	422	996	857	970	386	466	555	474	689	551	1499	1424	1646
Lgals4	-2.10723	0.378183	5.65682e-06	21050	30117	14242	32272	20390	18448	83138	103215	85659	107783	127982	127588	97739	103096	116129	151481	124203	118708				Adgrg6	0.706237	-3.30516	0.0010385	3338	3151	3708	2231	4936	5194	6	17	8	2	3	1	18	2	11	263	139	11
Tubb2b	-2.08028	0.421902	5.69983e-06	296	271	297	317	720	358	228	242	227	518	518	570	837	568	151	295	208	272				D830039M14Rik	0.681132	2.81269	0.00104035	8	11	12	21	30	8	8	8	6	13	21	18	35	41	22	4	0	3
Dnmt3a	1.06066	0.208876	5.71489e-06	2523	2164	2473	1943	2291	2322	2289	2428	2317	1319	1514	1662	1269	1366	2028	1223	996	1121				Rbp7	0.754283	3.97785	0.00104349	15	6	4	9	2	2	44	27	37	42	47	95	6	14	28	2	2	0
Duox1	3.8568	0.613125	5.73696e-06	54	58	40	22	30	12	4	5	5	7	0	4	3	4	9	9	5	9				Trp53inp1	0.258184	-1.0923	0.00104354	4885	4122	4383	3796	6122	5632	952	1246	1592	1334	1504	1406	6344	3360	2423	6190	5281	4063
Slc25a23	2.23021	0.430827	5.79972e-06	3268	3079	3115	1724	1774	2364	2024	1836	1702	565	693	852	652	930	1267	361	424	504				Epha7	0.850224	4.98228	0.00105274	132	70	164	85	188	235	47	57	121	7	9	19	2	3	1	0	1	0
Sorbs3	4.02516	0.647761	5.81876e-06	1632	1799	1171	880	995	878	192	186	160	20	13	16	114	107	141	93	178	238				Asb11	0.773421	-4.00929	0.00106245	44	31	18	9	13	3	0	1	3	18	15	12	12	4	19	146	280	198
Cacnb1	4.10931	0.640014	5.8497e-06	363	305	235	72	121	165	27	34	30	3	5	3	23	9	25	19	29	24				Ckap4	0.290471	-1.19528	0.00106245	4159	3845	5033	5654	6000	5463	196	214	150	158	252	217	805	573	548	1034	618	451
Gas6	2.64267	0.569784	5.86902e-06	14501	17743	7945	2883	3420	5504	10341	11231	9436	2065	1719	2333	1477	2291	9191	9521	8603	6594				Flvcr1	0.494201	2.04529	0.00106245	576	506	550	772	749	593	780	791	819	2789	2787	2800	581	759	430	778	586	633
Trim47	4.57312	0.592071	6.01667e-06	238	285	432	997	1032	488	16	16	8	9	8	6	32	10	13	7	6	6				Srd5a2	0.717257	-6.77313	0.00107631	0	0	0	0	0	0	1	0	0	1	1	0	0	1	0	115	84	113
Ggh	1.41762	0.274404	6.02818e-06	2278	2304	2162	1818	1699	1870	1201	1352	1096	1205	853	936	269	182	323	3135	2825	2218				Ces1e	0.481521	2.62675	0.001078	28	42	55	30	11	19	500	545	543	321	433	499	7	49	129	19	21	41
Gm32540	-5.26082	0.764003	6.06852e-06	0	0	0	1	1	0	299	268	216	70	66	107	12	18	93	26	22	38				Irs1	0.45218	-1.94866	0.00110393	940	976	732	704	1302	1371	13	26	58	23	16	28	269	139	149	175	182	103
Hopxos	-4.44838	0.805953	6.07264e-06	0	1	0	0	0	0	22	23	21	10	15	18	13	22	23	14	9	5				Slit1	0.632129	2.9146	0.00110568	1	1	1	3	1	4	52	52	33	19	34	46	16	33	42	8	2	0
Brd3os	3.29534	0.553652	6.43067e-06	115	99	58	28	48	62	22	12	14	5	10	11	15	7	22	3	3	3				Gm45184	1.00645	4.85605	0.00112109	0	0	0	0	0	0	3	4	2	26	31	35	1	1	0	0	0	0
Chst12	2.96473	0.489254	6.48479e-06	208	166	87	145	159	142	30	24	11	9	18	9	27	17	17	76	69	60				Myo5a	0.411932	1.55071	0.00114075	477	396	437	1072	1558	1005	169	179	239	283	279	293	541	596	182	286	178	154
Pola2	-1.0597	0.206835	6.48577e-06	1130	1318	1449	1567	1490	1315	2569	2671	2546	2145	2363	2743	2542	3471	2296	2634	2382	2584				Mapk4	0.62453	2.91725	0.00114759	59	38	45	40	94	72	19	20	30	38	31	27	11	12	27	3	4	1
Gcat	-2.59017	0.477164	6.63715e-06	142	135	158	268	211	151	383	436	299	850	829	873	269	418	186	258	232	214				Clca3b	0.537885	2.37253	0.00115271	28	54	99	98	25	48	47837	44298	51158	12049	15188	19568	17569	25917	20800	3781	3581	4090
Tmem131	-1.00369	0.19677	6.64191e-06	4500	4929	5188	5547	5169	4664	7922	7706	6422	7708	8886	8718	13278	12222	10117	16362	12777	13973				Hilpda	0.350756	-1.49398	0.0011617	1252	1046	1468	2114	2351	1861	168	223	170	229	266	255	378	197	258	1031	868	901
Itgb5	1.80396	0.341673	6.66885e-06	2924	2581	2663	1761	2243	2811	782	1005	792	1126	1114	1233	538	516	908	1015	731	757				Nrg4	0.717211	4.07124	0.00116172	18	13	5	6	3	2	62	66	67	197	194	244	9	6	33	3	7	2
Gm830	3.70454	0.655111	6.73081e-06	1272	1048	965	531	635	1181	247	296	321	19	22	21	8	22	41	5	4	9				Gm7451	0.273361	-1.14185	0.00116276	145	131	127	140	151	152	57	55	46	82	70	93	87	94	68	212	195	211
Fam184a	5.39294	0.659431	6.78157e-06	71	51	78	20	53	41	0	3	1	0	0	4	0	0	2	0	1	0				Txnip	0.29631	-1.11693	0.00117117	19149	21381	19271	15256	11577	14299	43117	49437	44795	23621	27609	27428	15465	9106	40840	40640	38026	37905
Spag4	1.90373	0.353224	6.79627e-06	215	196	139	137	120	175	53	67	50	35	35	50	95	77	73	30	37	26				Gm46455	0.791208	3.69386	0.00117239	0	1	1	6	0	1	22	21	9	16	14	21	7	7	4	0	1	2
Fbxo44	1.82189	0.347045	6.91915e-06	655	608	681	277	439	529	251	286	201	193	228	253	132	170	213	114	102	69				Gem	0.630921	2.59116	0.00117987	9	9	20	34	14	10	18	27	23	106	101	78	76	85	36	12	12	18
Sgcb	1.3748	0.250519	6.97034e-06	899	691	1078	1125	1370	1341	122	134	138	139	183	161	567	456	180	453	345	324				Gm15293	0.938742	4.69027	0.00117987	0	0	0	0	0	0	25	41	22	72	41	73	15	43	322	0	0	0
Pla2g15	1.63414	0.308683	7.02818e-06	518	421	374	304	375	435	148	180	177	79	121	127	206	174	159	180	172	135				Cyp3a16	0.883929	5.0184	0.00118815	0	0	0	1	1	1	16	16	26	28	35	23	0	0	1	0	1	0
2010106E10Rik	-9.1304	0.878042	7.12961e-06	0	0	0	0	0	0	1115	1570	1643	5826	4111	4241	7	72	633	7	10	0				Cxxc5	0.479466	2.5014	0.00119378	755	709	570	272	744	585	227	291	391	115	82	101	43	82	221	18	11	13
Pwwp2b	1.01518	0.198958	7.14158e-06	2269	2150	1618	1685	1668	1640	1119	1279	1148	806	904	921	1605	1582	1459	1649	1288	1261				Gprin3	0.274781	1.1034	0.00119378	516	490	653	802	742	595	2033	2129	3091	2113	2004	2188	1403	1477	1541	1551	1057	857
Gm38399	4.15123	0.656736	7.16991e-06	27	30	27	29	25	22	2	2	2	0	0	1	5	7	5	6	6	4				Sprr2f	0.944027	4.02397	0.00119378	9	10	4	73	47	58	0	2	0	16	61	21	3	2	1	0	1	0
Gja1	6.67122	0.598296	7.26e-06	1688	1410	1845	1734	2145	1950	1	1	2	0	8	3	20	5	1	1246	783	322				Notch4	0.391759	-1.65546	0.00119571	165	188	106	87	232	228	79	92	102	120	113	103	254	203	304	511	280	282
Ppp1r36	6.7449	0.768969	7.38487e-06	116	92	59	70	78	97	0	1	0	1	0	0	1	1	0	0	0	0				Synm	0.778298	3.29706	0.00119571	28	15	104	70	69	36	6	8	5	7	10	6	13	5	1	1	0	2
Chrm3	2.42207	0.533361	7.62576e-06	310	317	428	211	153	165	480	594	847	170	126	218	0	9	41	2	8	3				Ckb	0.671959	2.94064	0.0011968	89	61	119	541	767	393	2792	2718	2203	9856	9074	9752	778	1204	961	876	844	860
Dcun1d4	1.02267	0.199962	7.62865e-06	2718	2480	2555	2269	2599	2860	1310	1420	1130	1198	1333	1247	1737	1326	1545	2405	2010	2349				Tmem97	0.318918	1.27258	0.00119895	722	761	1127	1477	1347	1435	1884	1731	1581	2053	2087	2366	1237	1619	1157	1170	1058	1055
Cerk	-1.06896	0.204238	7.99724e-06	1119	1100	1088	775	854	855	4540	4522	3729	3072	3451	3774	1429	1161	2367	1799	1766	1742				Gm5809	0.325014	1.28033	0.00120307	160	169	260	326	307	297	390	343	374	504	434	554	285	373	223	299	268	238
Katnal1	3.073	0.563743	8.1675e-06	335	271	309	191	245	330	109	127	162	17	27	31	31	27	78	75	73	58				Erc2	0.633388	2.82643	0.0012059	64	41	38	60	74	62	19	29	21	107	104	111	210	125	150	6	8	17
Bach1	-1.16176	0.222328	8.23145e-06	1341	1232	1524	1398	1352	1294	4310	4923	5386	4766	4601	5163	3312	3248	5699	3121	2703	2741				H2-Bl	0.611378	2.9975	0.0012136	1	8	4	14	4	9	101	122	106	268	236	259	43	26	93	12	21	16
Cdk17	1.39194	0.263038	8.27893e-06	1125	967	1049	846	1168	1256	328	314	351	229	217	249	757	644	379	572	499	434				Rnf212	0.64294	-3.1054	0.00121551	0	0	0	0	0	0	16	11	8	17	44	31	10	28	79	162	158	107
Irf2bpl	1.02389	0.200803	8.28716e-06	2557	2421	2437	1979	3026	2905	1173	1383	1356	1113	1189	1221	1741	1365	1533	2889	2357	2397				Aspg	0.478345	-2.06389	0.00121849	4	7	16	14	19	26	158	156	115	98	108	199	206	268	595	280	374	600
Tmem106c	1.44108	0.282185	8.29674e-06	2093	1968	1705	1261	1606	1653	1105	1216	1102	585	637	756	904	876	957	1213	1222	996				Sycp2l	0.703707	3.10269	0.0012204	105	144	83	137	179	239	21	18	16	13	9	4	63	24	34	2	0	2
Shmt2	-1.31165	0.260409	8.44192e-06	3321	3475	3481	4157	3800	3512	7931	7111	5769	4444	5085	6032	10505	13045	5852	3996	3446	3275				Gm13415	0.559625	-2.92098	0.00122477	56	50	48	55	32	15	6	15	4	20	29	12	59	22	21	244	196	171
Dlg4	3.39388	0.606993	8.466e-06	290	229	182	40	67	114	48	49	81	16	7	18	10	9	26	8	9	7				Pou2af1	0.719317	3.91421	0.00124263	15	25	29	18	18	21	93	75	101	30	9	39	6	8	11	1	4	0
Tm4sf20	-6.65705	0.713394	8.71607e-06	80	114	21	25	10	0	6845	8708	8848	16951	17008	15688	3086	3122	5026	10009	8821	5947				Trac	0.652503	1.52614	0.00124263	1	8	5	9	26	9	1	1	7	19	19	19	8	2	0	15	6	8
Dhh	5.04587	0.612013	8.7851e-06	565	437	349	423	570	461	2	1	1	1	15	5	34	10	8	19	8	4				Tmem17	0.443344	1.83741	0.00124903	52	43	64	65	72	53	48	55	52	13	35	41	61	46	34	12	12	18
Vkorc1	1.85822	0.37487	8.91115e-06	445	383	238	265	202	219	299	282	298	129	128	162	55	101	145	86	77	87				Slc5a1	0.668654	3.41675	0.00125242	2	3	6	11	0	6	16882	20758	20120	84970	69481	77907	1990	3326	12023	1936	2437	1942
2010007H06Rik	2.74965	0.516165	8.96184e-06	1518	1518	2038	1304	645	1109	884	818	775	246	199	307	98	116	253	31	27	12				Avil	0.6668	3.5162	0.00125294	1196	1666	2741	5018	8080	8516	820	888	1062	181	150	203	820	426	748	38	36	43
Dgkg	-3.72725	0.559183	9.04144e-06	12	7	1	6	5	3	339	367	405	90	126	137	117	116	261	89	104	96				Stra6	0.795221	-4.4502	0.00126703	1493	1159	5606	3114	5516	10520	0	4	2	0	0	1	502	221	60	326	156	26
Arhgap22	2.53015	0.436439	9.10366e-06	630	515	495	387	509	493	71	107	42	66	60	66	202	68	107	45	27	28				Cyp3a13	0.586547	2.80397	0.0012786	1050	1483	507	598	852	818	4168	5015	4169	20819	19466	15075	2155	1412	3042	1468	1459	1393
Scg3	-4.98794	0.782527	9.29906e-06	2	0	0	0	0	0	105	107	93	35	38	43	9	17	32	5	4	3				Rap1gap	0.32558	1.51306	0.00131858	11476	12501	13420	11788	7653	7672	2993	3168	2309	1067	1296	1439	1009	1285	2828	355	425	306
B4galt2	2.45125	0.436952	9.34558e-06	407	325	163	197	260	247	73	57	56	40	26	51	177	139	134	28	12	14				Gulp1	0.395738	-1.86148	0.00133633	169	158	291	208	320	324	108	131	193	58	101	95	425	366	114	937	725	875
Pam	1.78257	0.329666	9.41706e-06	5535	5350	5209	3887	4928	7006	1011	1241	1301	903	884	736	3601	2302	1546	12060	10139	8592				Cbx3-ps8	0.847745	3.69702	0.00135017	5	1	2	0	3	0	7	12	11	10	15	10	39	80	37	0	1	0
9330182L06Rik	2.85079	0.520464	9.52051e-06	126	190	263	229	123	115	51	82	78	24	25	38	11	26	33	8	13	9				Pard6g	0.506169	2.09547	0.00135617	114	107	140	76	231	232	55	41	50	34	30	49	47	45	16	10	28	9
Tmem82	-3.4745	0.541121	9.66411e-06	93	121	23	50	45	13	918	926	969	854	1010	1194	478	517	559	493	315	365				Piwil4	0.469997	2.12468	0.0013595	6	2	1	1	1	0	104	90	102	92	132	141	44	91	196	13	15	12
Eva1a	5.65139	0.736616	9.72868e-06	219	153	104	15	120	196	10	5	1	0	0	0	2	0	8	0	0	0				Abca13	0.809897	-4.57466	0.00136324	2	0	0	0	1	2	0	1	1	1	0	0	0	0	1	17	22	21
Tmem212	7.04462	0.797387	9.75799e-06	445	397	243	32	33	49	0	0	2	1	0	0	4	0	2	2	2	2				Cdc42ep3	0.368451	-1.56397	0.00138327	38	30	9	21	26	29	46	65	54	32	49	37	124	99	97	227	136	122
Hspd1	-1.22465	0.243428	9.77169e-06	3142	3264	3814	4786	4931	4349	6753	7386	8103	6034	6524	7629	6161	8114	4897	6364	5549	5068				1700003N22Rik	0.406255	-1.97343	0.00138986	93	118	66	76	97	73	9	16	8	9	12	17	22	11	6	88	88	65
Neurod2	-5.43529	0.840652	9.77169e-06	0	0	0	0	0	0	37	35	34	17	12	27	4	14	6	0	0	0				4930402H24Rik	0.276317	1.07389	0.00139093	2492	2245	2437	2155	1916	1868	2025	2349	1901	2874	2933	2778	1891	1022	883	1976	1696	1728
Tgfb3	9.65588	0.708526	9.78462e-06	1865	1416	3625	4312	5724	5118	1	2	0	0	0	0	3	1	0	7	15	0				Wnt9b	0.81216	4.0202	0.00140561	0	0	0	0	0	1	29	30	18	22	15	24	7	4	9	0	1	1
Rnf125	-2.18604	0.3956	9.84604e-06	44	47	23	34	26	18	267	246	222	124	142	161	140	143	130	188	133	122				1700108F19Rik	0.672006	2.95202	0.00141594	1	1	1	0	0	0	8	13	7	21	35	40	9	5	2	5	5	1
Capn13	2.55111	0.47899	9.85456e-06	1443	1959	710	1367	2245	2367	555	581	455	433	485	476	141	208	467	2659	2153	967				Gm48768	0.445665	-1.60773	0.0014231	99	183	103	76	49	44	135	155	175	47	68	57	82	82	215	150	164	169
Gm26801	2.34449	0.47501	9.85456e-06	55	76	52	34	34	27	57	38	42	14	14	19	17	16	56	84	70	65				4930511M06Rik	1.00117	4.1316	0.00143059	4	1	1	0	2	0	28	45	31	17	5	19	1	47	0	0	0	0
Ift122	2.45483	0.453682	9.89903e-06	1322	1402	888	519	750	840	334	405	319	144	138	164	257	229	229	203	217	214				Sphk1	0.544144	2.29058	0.00143081	1015	948	722	631	856	860	200	190	140	756	743	761	255	115	91	176	160	135
Krt39	-3.80982	0.696656	1.00005e-05	0	1	0	0	4	2	6	5	5	15	18	4	67	31	14	136	99	99				Rnasel	0.425323	-1.83293	0.00144277	927	1020	955	1399	817	962	3711	4089	3201	6901	7192	6846	6155	4457	8955	14908	19841	21554
Myrf	1.68687	0.316363	1.00425e-05	17656	18527	16400	10733	14496	14235	7403	7039	6010	3883	4857	4730	5303	5545	4506	0	11	3				Otop3	0.739334	6.12079	0.00144359	3019	3290	1958	880	1254	986	296	525	420	119	69	90	0	3	2	0	0	2
Lcp1	1.77695	0.346739	1.00559e-05	2930	3509	3906	3033	2126	3313	1836	2120	2017	1333	1203	1386	489	881	905	68	118	59				Dhx58	0.352082	-1.44712	0.00145461	138	138	93	102	58	67	209	213	242	274	255	246	380	214	361	730	645	569
Ldhb	4.51317	0.587505	1.00944e-05	234	222	240	123	380	247	8	6	15	2	3	3	10	8	3	3	7	2				Fam71e1	0.588003	-1.4488	0.00145842	101	84	55	7	24	14	62	32	46	14	8	13	1	2	14	32	41	17
Eml3	1.03809	0.204608	1.01133e-05	3056	3029	2745	2128	2901	2850	1513	1485	1453	979	1180	1125	1782	1834	1378	1889	1436	1449				Ltc4s	0.533025	2.59775	0.00146227	158	118	109	152	180	141	113	123	107	50	33	36	24	20	71	10	3	6
Slc39a13	1.85754	0.349308	1.01133e-05	933	776	787	734	1006	880	348	269	316	174	162	193	296	309	266	297	174	139				Eva1c	0.454532	-2.17776	0.00147128	1051	933	1143	930	1332	1432	6	22	5	33	32	9	207	146	45	313	203	176
Bnip2	1.02397	0.199208	1.01202e-05	1927	1802	1857	1508	2131	2046	753	660	669	511	594	571	1074	948	571	954	756	682				Hoxb8	0.884738	-5.78138	0.00151006	0	0	0	2	1	0	1	0	1	1	6	3	898	1036	387	30	187	818
Nod2	2.80629	0.511579	1.01202e-05	417	372	371	346	447	392	164	156	142	50	45	33	117	80	173	80	76	107				Aqp1	0.577712	2.94821	0.00151724	73	155	154	407	314	137	9170	9998	12779	2593	2600	3268	1435	1965	4784	431	419	416
Sval1	-4.85076	0.823131	1.02474e-05	0	0	0	0	0	0	46	29	56	49	80	51	48	95	474	290	275	114				Cfap61	0.652967	3.14755	0.00153138	12	12	11	9	14	14	14	17	19	49	61	43	5	5	8	4	3	4
Rnf144b	3.37835	0.554023	1.03056e-05	1325	1320	851	499	520	598	219	156	265	48	86	78	16	10	16	4	3	3				Aoc3	0.746767	2.97631	0.00154559	4	4	5	3	8	4	6	6	4	9	10	4	9	5	0	1	2	1
Avpi1	1.14153	0.22183	1.03861e-05	2519	2544	2822	2839	3080	2649	790	995	808	1091	1000	1015	1227	1215	959	963	805	667				Scg3	0.588413	2.84073	0.00155166	2	0	0	0	0	0	105	107	93	35	38	43	9	17	32	5	4	3
Fam13a	-3.13652	0.489883	1.04015e-05	423	557	386	394	124	152	7216	7304	7539	7251	7521	6879	2250	1755	4869	2612	4939	4176				Peg13	0.312872	-1.17845	0.00156119	656	587	279	281	324	306	303	399	438	258	248	258	336	333	535	568	446	475
A030001D20Rik	3.48678	0.568101	1.04472e-05	104	125	116	42	65	85	13	12	14	6	4	5	10	10	7	33	70	29				Wdr31	0.322059	-1.24077	0.00156294	305	263	191	169	144	171	214	260	245	103	130	140	281	255	312	393	324	312
Ncoa7	1.59041	0.308966	1.05915e-05	758	772	711	636	682	771	266	280	272	271	324	266	282	463	377	372	581	592				Lgals12	0.289403	1.16446	0.00156601	883	1114	1051	1068	980	1007	1810	1766	1414	809	1034	1199	825	1039	818	845	607	403
Amigo3	-1.62782	0.315934	1.06063e-05	47	51	42	37	65	54	126	161	171	111	127	115	86	124	71	61	49	47				Tmcc3	0.435574	-1.94576	0.00156601	1235	1371	849	1015	1520	1220	773	826	774	1726	2137	1924	4418	2672	3379	7286	7352	7411
Etv1	2.45486	0.506818	1.06063e-05	78	91	95	64	23	41	44	66	87	28	28	34	9	33	78	7	8	6				B4galnt4	0.258481	1.05387	0.00157194	561	469	731	689	772	735	1912	2158	2420	1397	1447	1761	879	1131	1728	708	647	652
Cst6	-6.06579	0.761097	1.07081e-05	2	0	0	1	2	0	64	69	66	352	344	270	13	14	50	35	37	47				Kcnn1	0.421101	-1.57826	0.00157194	157	132	75	77	62	117	15	25	17	9	9	18	18	22	30	38	40	27
Siah1b	-1.4742	0.297191	1.07244e-05	94	123	120	167	177	187	225	209	217	191	222	234	345	480	193	231	194	195				Ugt8a	0.750735	-3.17559	0.00157704	194	187	357	304	255	239	5	3	6	1	1	0	2	0	4	8	98	4
Gm21885	-7.23315	0.768415	1.08206e-05	2	0	2	2	1	1	355	359	222	2072	2121	2002	15	50	224	25	14	35				Fgf13	0.85034	-5.23509	0.0015812	45	24	127	140	208	189	0	0	0	0	0	1	5	33	2	129	68	37
Ptpn14	3.04382	0.488862	1.09238e-05	4942	4350	5869	4986	5675	5515	356	522	560	146	231	186	1637	1389	489	1042	801	526				Gm15546	0.286596	-1.09659	0.00160333	131	142	120	83	117	111	180	136	110	158	135	146	93	65	163	258	226	209
Msrb3	4.31075	0.593695	1.09573e-05	98	143	146	133	333	281	8	3	5	1	2	4	18	21	8	11	5	8				Dhrs1	0.430929	1.71297	0.00160485	3056	3200	2960	4891	10365	6119	3563	3864	3242	5885	5975	6578	1609	1399	1077	3343	2258	1859
Gm12892	-4.25692	0.65711	1.10743e-05	27	30	52	208	298	173	1029	1068	856	3783	3640	3914	317	509	353	379	365	290				1810053B23Rik	0.969753	4.23332	0.00160536	0	0	0	0	0	0	6	4	9	19	8	10	5	8	4	0	0	0
Zdhhc8	2.81111	0.498627	1.11316e-05	1489	1444	1497	1092	1633	1662	441	375	278	110	113	132	281	421	279	348	241	382				Plk2	0.279269	-1.17415	0.00161547	4096	3501	4515	5003	6648	6497	341	478	478	600	757	636	4741	2681	1496	3336	2783	2322
Cyp2b10	-4.45895	0.606224	1.12158e-05	234	372	111	99	65	80	4122	4538	3305	10565	11131	11191	143	195	375	321	248	143				Stard13	0.276012	1.0702	0.00164203	579	600	726	1084	888	810	856	902	1072	696	672	882	996	1332	833	649	467	473
Nefh	2.43435	0.461585	1.12158e-05	114	109	82	95	125	102	39	47	36	19	26	23	27	53	56	35	103	47				Cd320	0.339669	-1.32621	0.00164217	638	517	390	434	550	542	506	494	464	196	236	231	244	299	268	870	893	620
Kif26b	4.37403	0.662549	1.12543e-05	85	65	332	262	523	626	9	22	13	16	19	16	127	176	557	46	86	230				Inhba	0.785778	-4.67168	0.00164217	172	195	149	217	1398	954	0	0	0	2	0	2	158	25	13	255	100	50
Celsr2	1.70226	0.327989	1.13709e-05	2003	1991	2202	1456	1969	2062	947	834	927	400	487	605	886	964	785	452	457	451				Fbln1	0.37856	1.5892	0.00165245	3692	4399	5265	3131	2849	3164	4867	5224	4013	6651	5981	6717	2085	2818	2447	1182	1652	2565
Phldb2	1.21374	0.230507	1.13709e-05	5823	5259	4447	5379	6797	6025	921	1181	951	908	1284	893	5933	4131	1927	3522	2469	1917				Xaf1	0.36425	-1.56001	0.00165392	84	80	114	127	148	125	42	70	91	76	77	47	249	132	135	312	255	333
Obscn	-3.79275	0.629184	1.14528e-05	0	2	3	0	1	2	54	88	70	25	37	59	21	24	47	5	10	6				Rapgefl1	0.468698	-1.85662	0.00168472	856	884	570	241	207	243	545	493	334	475	531	476	370	349	581	1649	1324	1123
Itih2	7.98318	0.762627	1.14845e-05	229	260	451	99	271	356	0	0	1	0	0	0	1	1	0	4	6	1				AI854703	0.723976	-2.88075	0.00169824	39	25	15	15	19	27	24	18	11	3	6	0	16	3	48	110	78	12
Plxnb1	2.36836	0.436347	1.15448e-05	5788	4794	5826	3017	6185	5293	1561	1890	1665	625	684	832	1263	1740	1277	971	747	679				Tm6sf2	0.584252	2.92081	0.00170942	140	222	78	204	152	114	2377	2581	1851	6905	6974	7007	252	333	1195	607	371	203
R3hdm4	1.26703	0.250913	1.15485e-05	7874	8671	5848	5743	5437	5191	3589	3631	2825	2468	3024	2881	4871	3986	4274	7735	7036	6866				Zfp937	0.276161	1.1542	0.00171144	129	114	105	68	70	92	314	309	403	217	178	251	92	82	171	76	63	84
Hebp2	2.32199	0.425088	1.16953e-05	353	427	290	248	229	263	49	62	54	51	72	116	52	53	60	196	238	133				Tent5b	0.332852	-1.45632	0.00171165	999	943	894	702	908	778	49	66	41	36	54	33	244	141	45	449	251	228
Slc9a1	1.5353	0.298259	1.16953e-05	6858	7554	8420	4267	4627	5420	2559	2498	2163	2009	2215	2356	2539	2660	2206	3154	2819	3064				Mdh2	0.418919	1.7064	0.00171432	8310	8904	9948	12464	14068	11529	23437	29120	23587	54681	55820	60176	13202	15386	16171	16617	15559	13400
Vmac	1.75491	0.355791	1.16953e-05	691	739	655	463	557	652	585	611	648	268	248	282	201	236	428	496	374	321				Gm36738	0.425377	-1.4539	0.00171806	124	94	135	79	34	35	85	96	121	91	79	88	13	21	88	123	101	107
Prune1	1.04627	0.207847	1.18096e-05	1794	1782	1625	1930	2241	2017	833	884	748	876	874	989	1115	1031	1110	2544	2031	1882				Nts	0.922439	4.89325	0.00172781	0	0	0	0	0	0	12	18	24	158	93	141	74	81	380	0	1	0
Uhrf2	1.0517	0.210568	1.18096e-05	3235	3539	3659	3470	3976	3547	2375	2472	2396	1425	1667	1699	2216	2331	2282	3941	3346	3286				Cfap43	0.28442	-1.1243	0.0017326	730	620	482	549	524	486	142	167	182	81	98	132	324	351	200	436	296	364
Zfp467	2.08106	0.431044	1.18597e-05	654	836	633	292	235	352	606	623	551	269	276	251	200	166	634	288	286	286				Irak3	0.369808	1.5452	0.00174188	235	233	226	131	131	227	108	116	137	71	79	82	163	166	157	20	44	24
Cyp2c40	-5.90181	0.816846	1.18916e-05	0	0	0	0	0	1	46	38	40	64	66	62	1	2	5	27	15	7				Mbl2	0.966939	5.79824	0.00174538	0	0	0	0	1	0	18	12	63	85	49	68	0	1	3	0	0	0
Skap2	1.08158	0.219298	1.18916e-05	2096	2048	2464	1959	1874	2187	1481	1627	1518	1495	1679	1583	1112	1156	1926	4330	4024	3656				Kif26b	0.674367	-2.85177	0.0017578	85	65	332	262	523	626	9	22	13	16	19	16	127	176	557	46	86	230
Fgd4	-1.00234	0.200617	1.19321e-05	1026	1196	1018	1235	1034	875	1769	1844	2202	1919	1967	1924	1686	1891	1465	2422	1981	2032				Bst1	0.849545	5.8033	0.00177628	416	290	207	94	85	213	171	209	160	2202	2079	1689	7	4	204	7	5	1
Upk3bl	2.85658	0.525751	1.20402e-05	63	42	48	37	33	30	8	21	6	9	12	5	21	12	43	49	27	29				Tmem45b	0.315558	-1.22433	0.00179678	8677	8830	8254	7772	5626	6350	8524	8910	7030	11556	10803	10712	6208	4697	9503	22309	20527	15951
Ccdc136	3.15698	0.515272	1.22056e-05	188	167	173	109	97	99	8	21	7	16	14	8	28	21	15	18	21	12				Fam84a	0.301494	1.14977	0.00181071	900	868	1006	906	1598	1472	628	816	835	1027	1056	960	2021	1256	1130	776	557	584
1700108F19Rik	-5.23434	0.775932	1.24139e-05	1	1	1	0	0	0	8	13	7	21	35	40	9	5	2	5	5	1				Sytl2	0.356336	-1.34673	0.00182816	2576	2829	930	1139	1574	1211	706	801	973	577	707	568	1491	1301	2178	1553	1251	1392
Cpq	2.06847	0.474248	1.2447e-05	647	642	516	118	209	184	804	967	770	400	408	421	6	22	90	168	232	229				Gm49410	0.90747	4.28226	0.001833	0	0	0	0	0	0	14	7	18	18	17	16	5	2	4	1	0	0
Nr3c1	-1.12161	0.217946	1.24864e-05	1705	1730	1875	1609	1422	1160	6284	6415	7078	5281	5253	5654	3052	3155	4921	3605	3405	4191				Slc3a2	0.316713	1.17281	0.00183658	4115	4116	5922	7419	5439	4481	3648	3831	3446	6190	6449	6427	8238	5897	3184	4754	4253	4035
2310016G11Rik	-3.22271	0.536339	1.25113e-05	5	11	5	6	2	1	74	74	58	90	113	93	32	38	63	54	81	53				Mtcl1	0.387906	-1.56525	0.00184518	3073	3282	2103	1456	1538	1757	107	109	106	71	161	71	457	339	255	449	420	352
Tigd4	-2.37074	0.460074	1.25409e-05	12	7	14	11	12	11	18	26	18	22	44	42	67	54	26	35	25	27				Syt7	0.408847	-1.70845	0.00184632	124	87	175	122	106	135	156	218	227	334	355	309	1373	935	1773	827	772	1063
Retsat	-2.00213	0.370655	1.26398e-05	851	1045	811	729	752	940	3333	3605	2648	4616	5446	5203	919	1029	1290	1970	2146	1744				Vwa5b2	0.63909	3.29034	0.00185414	0	2	0	1	4	1	452	360	444	81	100	141	19	101	90	11	14	10
Myo3b	6.69758	0.800201	1.27271e-05	210	108	161	9	25	77	0	0	2	0	0	0	1	0	1	1	0	3				Ehhadh	0.394793	1.71444	0.00186155	614	714	348	382	305	328	2636	3027	2369	4398	3942	4568	510	641	1133	658	749	843
Lamc2	1.54988	0.288354	1.27865e-05	19374	17362	19906	16164	23927	23379	2280	2608	2219	3275	4054	2766	16330	9682	5556	16655	12651	12119				9130214F15Rik	0.399408	-1.65508	0.00187299	1	4	0	1	2	3	19	16	15	12	12	18	15	21	25	39	44	36
Pappa2	-6.03628	0.813998	1.29601e-05	1	0	0	0	0	0	231	344	647	135	118	189	5	12	85	54	41	10				Nkx2-2	0.667728	3.70649	0.00188515	5	0	0	1	0	0	284	358	424	77	82	127	16	56	87	8	2	7
Zdhhc1	2.29319	0.453591	1.31217e-05	1256	1230	865	504	571	839	583	586	609	189	195	253	204	202	338	336	328	303				Eml6	0.336602	-1.29436	0.00188785	256	239	169	124	148	129	56	87	83	42	68	55	49	52	50	138	170	120
Clmn	1.73987	0.342021	1.31875e-05	7110	6965	9826	5164	5202	5952	2936	2881	2672	2913	3126	3205	2963	2019	4263	9826	8413	6870				Plekhh2	0.391787	-1.65324	0.00189493	616	530	591	460	864	799	11	18	13	17	15	20	14	24	13	93	90	48
Fignl2	3.16367	0.557651	1.32301e-05	388	349	198	74	144	170	38	30	29	73	48	46	25	16	67	53	61	54				Sdcbp2	0.413959	-1.72719	0.00189727	2520	2677	1218	1640	2508	2028	1163	1328	1047	2172	2502	2021	2180	1412	2315	7403	6321	6114
Slc15a1	-5.88339	0.678628	1.3236e-05	5	2	8	3	9	5	399	602	476	2446	1786	1525	22	50	309	372	289	146				Celsr1	0.616317	-2.58595	0.00191864	2984	2955	3685	2026	3224	3764	1179	1413	1456	152	168	186	2377	2123	1969	6577	4776	3807
Ppa1	-1.61757	0.318833	1.3379e-05	2361	2443	2173	3387	4125	3249	5834	6046	6033	7271	7621	8009	4231	5351	3982	7196	5745	4586				Sectm1a	0.523842	-2.26639	0.00193724	21	23	22	17	59	84	70	82	105	103	105	134	84	132	228	397	471	480
Six5	1.94981	0.38485	1.3379e-05	677	624	581	302	379	436	334	348	261	141	141	183	180	178	240	189	166	142				Tpm2	0.780856	-4.2038	0.00193751	1000	1037	192	306	891	1252	7	15	3	89	100	102	82	70	74	2208	1828	2823
Hsd17b7	-2.04969	0.404288	1.35033e-05	905	1062	948	1359	1792	1430	1819	1921	1493	3588	3394	3294	2854	2901	1545	3929	3610	3200				Gm12454	0.297025	-1.1183	0.00195473	218	170	221	98	105	121	268	235	200	192	193	230	142	144	222	408	367	299
Mme	-6.08318	0.648897	1.37624e-05	3	6	9	14	19	12	2350	3106	3553	6459	4407	5488	3	5	92	5	4	1				Rps4l	0.759031	3.55729	0.00197139	542	509	470	52	333	58	737	607	482	476	300	281	89	2	17	33	6	56
Otud1	2.42187	0.465419	1.3774e-05	114	134	93	124	120	108	55	62	62	19	27	14	43	35	75	122	88	96				Hmcn1	0.769127	-6.20014	0.00201234	0	2	0	4	2	5	0	1	4	0	0	0	0	1	0	195	184	83
Suz12	-1.12048	0.226476	1.38e-05	2926	2992	3416	4192	3939	3512	5250	5714	5205	6015	6045	6563	6359	7592	5309	6242	5508	5584				Gm18953	0.326756	-1.29123	0.00202038	38	42	61	54	42	47	51	47	44	63	77	57	71	86	105	148	139	134
Fggy	2.3989	0.472815	1.38911e-05	662	547	528	278	377	594	262	326	299	95	92	102	155	172	262	389	398	487				9130024F11Rik	0.69852	-3.61963	0.00203269	1	4	1	5	4	4	4	3	1	22	19	27	38	48	80	180	202	245
Trappc2	1.43296	0.283941	1.39521e-05	249	250	153	185	194	170	83	93	107	92	68	74	106	116	107	196	165	142				Slc7a15	0.795295	4.50818	0.00203296	1	0	0	0	0	0	29	48	43	166	127	166	2	2	8	1	2	3
Liph	1.47247	0.291861	1.4029e-05	3914	4774	2999	3295	2573	2926	1463	1504	1527	1686	1683	1550	1609	1407	1944	2331	1938	1517				Sema4f	0.721164	-3.77638	0.00204188	66	60	180	118	257	272	0	1	1	0	1	1	148	92	13	23	56	62
Tcaf1	1.74454	0.342373	1.4029e-05	1215	1154	1133	993	1388	1075	562	554	633	279	246	345	551	544	541	1727	1544	1716				Tek	0.77103	3.88813	0.00204333	52	84	199	351	557	433	42	40	55	15	13	20	6	11	8	0	2	2
3830403N18Rik	1.60379	0.996291	1.41058e-05	0	14	0	107	0	0	0	0	0	0	0	0	0	0	6	0	0	0				Fkbp11	0.259511	1.02062	0.00204863	1236	1132	1086	1735	1381	1217	297	322	349	294	346	412	406	396	478	229	178	136
Prrx2	7.04843	0.749733	1.41491e-05	120	112	289	36	103	258	2	0	0	0	0	1	0	0	1	0	0	0				Gm609	0.670917	3.95681	0.00205024	9	7	13	0	1	0	949	663	831	175	189	177	163	353	662	10	13	6
Il6ra	2.45191	0.448877	1.41518e-05	178	173	68	141	134	100	30	40	32	22	17	17	56	48	45	40	44	42				Prex2	0.789276	-4.26474	0.00205792	49	41	120	73	247	328	0	1	2	0	0	1	2	1	2	16	61	40
Trim30d	-3.9275	0.575634	1.42956e-05	45	23	17	13	10	7	313	357	393	891	743	703	143	150	322	754	732	654				Sec13	0.282794	1.0825	0.00206	3188	2954	2796	3434	3855	3291	3628	3541	3069	5142	5360	5799	2878	3187	2654	2971	2781	2469
Rap1gapos	2.2486	0.431591	1.43002e-05	78	67	69	100	71	68	36	41	44	19	31	24	18	13	41	6	6	8				Ldb3	0.530036	2.36941	0.00206357	52	43	29	16	13	17	725	684	521	1653	1629	1497	738	944	1337	182	185	128
AC140346.1	-5.37739	0.840214	1.44949e-05	0	0	0	0	0	0	18	36	15	41	25	25	8	7	15	0	0	0				Pear1	0.349102	-1.40965	0.00208623	3453	3417	2314	1432	1943	1984	511	582	357	459	676	472	1423	1310	826	2133	1576	1768
Gm36945	-2.64928	0.447965	1.45326e-05	18	46	21	39	14	15	501	522	506	309	273	340	131	110	295	71	40	66				Cct6b	0.435349	-1.53652	0.002107	36	36	21	24	13	15	21	27	28	18	15	19	2	17	21	32	44	26
Carmil1	-1.0951	0.221127	1.45402e-05	1671	1767	2045	1912	2359	2103	3377	3452	2988	3527	3966	4161	4049	4330	3746	2875	2376	2222				Dnajc28	0.330904	-1.18467	0.002107	445	350	375	165	291	357	312	353	358	161	155	175	120	119	239	314	333	358
Cdr2	-3.25095	0.565157	1.45402e-05	337	298	279	571	561	409	1091	1216	1195	4467	4550	4456	401	484	332	258	242	225				Pde3a	0.270322	-1.0423	0.002107	1	0	0	0	0	0	2674	2286	2528	1884	1872	2161	289	315	1147	2655	2163	1475
Rubcnl	4.19683	0.681712	1.46759e-05	32	13	53	22	33	21	1	1	0	4	2	2	4	7	17	15	13	5				Slc8a3	0.770812	3.81277	0.00210783	5	1	3	1	6	10	17	16	17	17	26	20	2	2	3	2	0	1
Gm49417	3.82918	0.662743	1.47054e-05	167	155	110	51	69	96	31	16	24	1	1	2	3	12	13	3	2	2				Cacna2d1	0.594581	2.83804	0.00210795	18	12	11	16	47	10	161	203	213	87	73	74	67	73	131	3	19	12
Dync2h1	1.21566	0.246795	1.47826e-05	676	673	597	448	560	544	369	447	482	313	278	343	342	241	396	800	668	627				Gm9917	0.362319	-1.55854	0.00211458	18	28	17	31	55	25	129	150	114	161	201	198	210	144	159	687	688	567
Klhl7	1.23468	0.249321	1.47826e-05	823	825	804	754	678	656	538	508	593	309	329	361	371	381	400	461	432	428				Lrp2	1.00631	2.61785	0.0021327	23	12	4	430	460	202	0	1	0	3	12	14	1	4	0	0	0	0
Myo1a	-3.49259	0.521725	1.51859e-05	886	1751	679	850	292	454	20234	22818	21431	29027	35268	29972	4911	6197	20697	13880	13249	9743				Fam57b	0.646452	2.7838	0.00213542	6	4	7	15	9	7	14	11	15	45	52	58	8	8	5	7	9	3
Pde4a	2.76622	0.486121	1.5339e-05	634	579	526	460	515	721	150	125	69	68	69	62	141	36	106	99	91	69				Rdh9	0.714139	-3.16327	0.00213716	0	1	3	0	0	0	1	3	3	12	5	9	5	11	34	27	41	60
Lct	-8.13651	0.819599	1.53738e-05	2	6	2	0	2	4	134	230	358	10538	7035	7621	5	6	12	3	1	1				Gm17250	0.918595	3.77002	0.00217094	8	4	9	14	4	4	17	20	23	5	1	5	51	38	40	0	0	0
Hoxa4	-4.32518	0.820555	1.55032e-05	0	0	0	0	0	0	10	10	10	13	10	19	8	18	18	44	40	55				Pgrmc2	0.325811	1.26855	0.00217094	2095	2127	2654	2565	2477	2527	3157	3433	2828	5307	5314	5696	1704	1763	1766	2391	2200	1943
9330102E08Rik	3.33832	0.562681	1.5516e-05	77	61	47	37	29	39	6	5	6	6	7	4	11	6	13	20	7	7				Atp12a	0.943962	-5.48137	0.00217281	12	7	194	50	58	129	1	10	26	0	1	0	17	9	5	2074	1504	293
Smarcd3	3.01836	0.566909	1.5567e-05	265	231	218	107	134	178	66	91	101	17	11	27	14	22	32	15	15	9				Ubxn10	0.515696	-1.48325	0.00219476	57	68	32	23	44	28	81	86	25	18	14	17	16	41	213	26	31	44
Abcb8	-1.06742	0.217142	1.5673e-05	2130	2228	2683	2656	2604	2481	3919	4080	3272	3920	4267	4826	3497	4285	2918	4464	4087	3660				Cpeb2	0.342172	1.27618	0.00220429	326	369	471	678	447	380	694	620	755	1094	1219	1142	1441	1197	874	728	516	579
Cnnm1	-6.00744	0.74521	1.5673e-05	1	2	0	3	0	0	632	544	668	80	109	94	14	30	37	21	24	8				Ces2g	0.539574	2.70698	0.00222772	5910	6636	2505	2123	1926	1621	6954	6377	6093	1706	1997	2411	620	590	695	640	373	235
Lyar	-1.32458	0.272305	1.57956e-05	829	828	865	1345	1392	1226	1324	1456	1503	1450	1531	1784	2018	2624	1244	1566	1288	1356				Itga2	0.276397	-1.08506	0.00225233	10067	8319	9272	10984	17244	14891	3238	3523	3250	2337	2970	2664	8532	6769	5601	9824	7245	9804
Smim1	3.08714	0.591698	1.59796e-05	177	181	110	41	50	95	81	53	33	16	15	19	3	13	19	1	4	0				Peli3	0.549361	-1.82897	0.00225353	70	80	59	19	17	24	18	30	16	11	10	7	10	13	33	23	19	47
Plin5	4.16863	0.609589	1.62788e-05	218	229	71	75	75	57	16	9	7	11	4	5	3	2	4	17	7	29				Pik3r5	0.711168	4.51679	0.00226744	193	129	118	25	14	37	586	545	705	95	89	122	46	63	524	1	1	5
Crim1	1.36738	0.274929	1.66036e-05	3456	3448	4160	2586	3244	3674	2221	2184	1935	1221	1346	1396	1981	1726	2032	2443	1925	1924				Clca4b	0.739504	3.74972	0.00227914	1	5	1	1	4	0	4832	5241	6576	30016	30330	26039	3174	2665	11018	512	452	805
Prrx1	-7.59563	0.859808	1.67558e-05	0	0	0	0	0	0	68	107	55	434	337	389	1	2	8	1	0	0				Cth	0.351623	1.34132	0.00228115	401	418	401	730	390	299	2911	3325	3004	4070	4250	5008	2562	2769	2398	1598	1793	1871
Fjx1	4.92059	0.639367	1.69326e-05	252	203	265	57	294	168	1	11	3	4	5	9	1	6	4	0	1	6				Oplah	0.306176	-1.08147	0.00230737	1477	1510	1048	651	805	944	695	743	566	866	619	722	299	299	936	806	823	820
Ppef1	-3.63192	0.642198	1.71035e-05	4	3	5	18	19	19	139	131	43	59	51	88	84	21	11	19	35	8				Cd83	0.535815	2.70902	0.00230905	0	0	1	0	0	2	364	372	391	104	95	118	19	40	122	9	16	8
Pitpnm3	2.93465	0.516454	1.71475e-05	2761	2725	2156	1582	1661	2096	427	526	405	109	147	166	978	533	568	1148	1015	971				Gm48529	0.274468	-1.08189	0.00231667	172	189	105	151	180	218	58	66	63	81	70	77	196	158	120	223	219	188
Ano8	1.41218	0.283847	1.7232e-05	1094	1166	884	733	1344	1254	547	636	675	367	389	479	658	679	749	851	760	685				4933421A08Rik	0.373927	1.48519	0.00233895	80	70	59	76	66	78	67	51	47	62	91	94	24	39	28	42	27	24
Gm47949	1.35963	0.266277	1.7232e-05	525	527	538	554	648	587	162	155	132	180	217	195	191	162	156	208	218	176				Cyp2c38	0.902673	6.12886	0.00234241	0	0	0	0	0	0	148	155	145	50	51	53	0	0	2	0	0	0
Aire	3.02376	0.544636	1.72526e-05	134	153	61	140	63	74	31	38	20	16	10	10	33	18	48	34	31	17				Gm5884	0.273678	-1.05368	0.00234824	241	236	197	189	135	167	239	247	224	326	288	290	310	321	324	667	611	496
Zfp839	1.04353	0.217081	1.74195e-05	558	540	443	350	386	393	523	479	469	338	329	396	319	262	523	447	392	339				Gm17025	0.301245	1.11524	0.00237387	146	149	143	162	187	151	128	140	181	112	103	118	114	115	52	157	82	61
Pdgfc	2.94693	0.491873	1.74321e-05	762	648	939	434	550	574	30	60	24	68	53	59	237	138	96	313	382	557				Hebp2	0.372304	-1.44569	0.00237387	353	427	290	248	229	263	49	62	54	51	72	116	52	53	60	196	238	133
Cdhr2	-3.16711	0.540829	1.74635e-05	1893	2287	1002	3947	4510	3276	12979	14778	13873	31945	29551	27235	18538	11522	17099	44652	41742	41933				Crybg2	0.29025	1.07489	0.0023922	542	576	498	846	569	470	1944	2227	2346	2837	3119	3234	2492	2338	1784	1644	1623	1830
Phf21a	1.15578	0.235156	1.75764e-05	2100	2132	2091	1646	1631	1577	1280	1321	1136	870	950	910	1313	949	1283	1399	1225	1187				Gucy1a2	0.814819	-4.9323	0.00239653	4	0	3	4	2	3	0	0	1	0	0	0	3	1	1	24	27	17
Chst15	2.14764	0.418711	1.77411e-05	904	755	1267	755	854	732	407	507	274	213	189	266	475	254	570	1135	1476	1218				5730409E04Rik	0.727675	-3.11303	0.00245512	116	109	31	29	64	72	3	1	1	1	0	0	13	3	6	9	18	19
Car2	2.87847	0.464541	1.79669e-05	24040	31069	14035	18012	13774	12649	601	896	654	1029	985	829	3741	1926	543	86561	72286	50864				Oxr1	0.275093	-1.04288	0.00245794	5534	5069	4986	3922	4494	4469	1970	2268	2242	1180	1133	1377	2242	1795	1557	4747	3769	3024
Mptx2	-8.21422	0.888454	1.81032e-05	0	0	0	0	0	0	148	181	438	2550	1539	2666	67	370	932	2	4	0				3110070M22Rik	0.477903	1.75934	0.00246434	9	20	20	12	14	26	12	18	23	24	37	27	26	18	5	16	14	14
Stxbp6	1.14137	0.235781	1.81534e-05	900	1014	768	928	716	794	751	743	813	456	500	521	669	633	932	1243	1137	932				Gm47238	0.925491	5.69446	0.00246549	0	0	0	0	0	0	23	45	16	46	27	39	0	0	1	0	0	0
Ncmap	3.04096	0.50664	1.82786e-05	1563	1462	1481	500	630	669	84	107	74	98	111	120	106	51	50	238	212	254				Acsm5	0.931634	6.06627	0.00247642	3	0	0	0	0	0	41	52	89	91	66	63	0	0	3	0	0	0
Pdlim4	4.35816	0.646956	1.8532e-05	864	853	803	476	543	505	33	79	54	6	4	9	17	18	14	63	34	12				Soga1	0.558568	3.05872	0.00247719	195	151	107	28	87	130	369	482	463	104	101	127	21	42	94	13	13	10
Svip	-1.13136	0.222117	1.86158e-05	536	536	509	507	427	417	2749	2598	2819	1696	1512	1768	641	703	1144	864	798	718				Tac1	0.459123	2.30442	0.00248104	0	2	0	0	0	0	860	1078	1637	421	362	499	20	54	236	51	41	25
Slc4a4	2.26531	0.434212	1.86217e-05	15700	13525	15828	10263	14239	14756	5264	5980	4669	4454	4145	4619	3525	2319	5349	337	693	1181				Klhdc7a	0.496903	-2.10666	0.00248876	4214	3965	3890	2642	3519	3969	168	268	213	57	71	60	1022	767	321	1154	982	722
Ddc	-3.04658	0.522454	1.86958e-05	297	572	165	360	146	97	2449	2551	2368	1989	2467	2435	2575	2020	1547	2007	1470	1041				Rpe65	0.866896	-6.07683	0.00250045	0	0	0	0	0	0	0	0	0	0	0	0	6	1	1	60	38	35
Ica1	1.75769	0.344625	1.86958e-05	1638	1742	1618	1823	1605	1560	595	761	836	319	438	365	944	902	822	1234	1059	919				Mapk12	0.353662	-1.40192	0.00250434	669	604	349	446	372	453	27	47	43	23	40	32	188	148	85	177	101	143
Slc22a13	-5.14004	0.770114	1.86958e-05	0	0	0	2	2	0	6	9	7	53	64	70	1	1	0	5	4	0				Smim24	0.50995	2.5771	0.00250705	98	191	33	110	109	112	15456	15742	16334	23923	22087	24788	511	940	7919	1270	1046	1025
Pklr	-3.79321	0.585406	1.88277e-05	1404	1844	1194	1510	1698	1087	9472	10572	10723	42237	41088	44919	5088	4856	8452	5790	5096	4638				Hoxa10	1.09937	-6.5232	0.00252332	0	0	0	0	0	0	0	0	0	0	0	0	0	2	1	3162	3906	1294
Ociad2	1.1341	0.231952	1.88511e-05	7797	7475	6910	6811	6224	6932	4956	5328	4558	3466	3561	3983	2140	1932	2304	2602	3265	3741				Cdh13	0.766792	-4.44566	0.00253688	9985	9246	12333	5499	8024	9058	1	6	2	53	86	28	1777	900	364	2858	1837	2158
Jaml	-2.94689	0.507026	1.88639e-05	277	220	573	929	437	476	5709	6311	5907	4277	4256	5185	1844	2195	2985	821	414	334				Gm1969	0.408747	1.61804	0.00253688	177	157	183	183	210	211	94	111	89	207	209	214	96	90	88	66	55	76
Tfpi2	-5.52442	0.832068	1.88639e-05	0	0	0	0	0	0	49	64	49	73	73	72	2	10	34	8	17	4				Neb	0.961653	4.12494	0.00253839	0	0	0	0	0	0	8	5	10	11	7	12	2	8	3	0	0	0
Pnkd	1.52577	0.310091	1.90844e-05	1733	1816	1157	770	920	1025	794	892	812	585	625	749	230	254	328	232	233	173				Hoxa1	0.708912	-3.4559	0.00255472	0	0	0	2	0	0	2	3	2	1	7	5	2	1	10	56	34	21
Gm5790	-1.4521	0.292207	1.9289e-05	433	495	471	591	664	583	1016	1076	860	1262	1388	1382	1229	1392	1125	1618	1501	1438				Trpm6	0.561153	-2.70328	0.00258692	352	337	613	422	542	595	67	98	90	366	462	277	1393	1034	1066	3355	2363	1997
Igdcc4	2.73684	0.60643	1.94097e-05	1960	2107	997	341	190	362	927	842	889	199	223	270	131	162	692	225	353	624				Cebpd	0.39548	-1.36724	0.00259335	911	894	506	261	619	690	167	229	259	94	97	99	99	108	202	268	236	245
Msi1	-3.78265	0.558534	1.94402e-05	32	18	5	11	39	21	1437	1394	1769	633	668	781	130	409	804	3	0	3				Dzip1l	0.539259	2.20931	0.00260455	1919	1778	1810	1527	1652	1831	18	12	7	20	46	33	25	43	18	12	10	2
Slc2a9	-2.72371	0.478108	1.95196e-05	63	40	66	105	94	94	479	563	401	778	791	780	329	263	515	511	541	544				Igtp	0.357616	-1.34999	0.00261169	112	121	61	74	75	66	62	88	118	70	57	69	145	77	157	143	176	171
Ptgs2	4.46607	0.587701	1.96534e-05	2333	1802	1739	1572	4207	3592	3	11	12	26	51	21	2395	430	248	473	271	167				Ndnf	0.584674	-2.93881	0.00263469	2946	2374	2351	3325	4897	3497	3	4	0	12	14	5	57	15	14	300	138	46
Igf2r	1.33555	0.26732	1.96893e-05	11838	11965	18674	11205	12376	12664	4933	5791	5415	4844	5130	5658	6753	5770	6047	5594	5057	6095				Gimap5	0.954	4.73207	0.002659	0	0	1	0	0	0	100	62	32	13	20	17	4	15	40	0	0	0
Gata5	1.37835	0.266602	1.98172e-05	4700	4901	4245	4699	7003	6920	1546	1775	1999	1548	1697	1698	2778	3205	2341	2	4	0				5330411J11Rik	0.614278	-2.7264	0.00265986	27	36	19	54	30	26	0	4	2	3	1	1	22	7	10	23	21	22
Myo15b	-4.40521	0.612849	1.98172e-05	882	1151	412	383	121	100	14373	14977	13191	22712	25100	22762	14468	10721	17363	18905	15346	14936				Gm16054	0.599572	2.62747	0.00272141	11	16	4	4	6	4	97	98	85	161	128	89	99	70	76	2	14	28
Rhobtb1	1.58092	0.313368	1.98172e-05	229	284	251	204	277	170	86	105	113	86	62	74	121	88	104	134	111	114				Hsd17b6	0.901456	5.20358	0.00272323	35	27	7	2	1	1	38	39	18	244	293	210	3	5	9	1	0	2
Bpnt1	-1.83619	0.354954	1.98267e-05	4164	4402	3460	5389	5528	4897	13941	15790	12458	20816	19264	22761	4469	4912	5811	4923	4804	4605				Crot	0.303355	1.20069	0.00272449	4310	4541	2612	2293	2996	2934	2360	2748	2525	3384	3568	3425	1354	1327	1775	1228	1239	1129
Tmem63c	4.93619	0.61194	1.9884e-05	164	123	98	234	180	262	2	0	3	7	2	3	5	3	4	6	5	8				Sdr16c5	0.982344	5.2736	0.00273144	1	0	1	0	0	0	61	55	105	8	6	17	2	2	1	0	0	0
Atp5g1	-1.02172	0.207532	1.99942e-05	218	212	189	249	279	214	548	547	497	456	415	561	240	295	275	423	394	367				Ptpn5	1.07126	-4.95297	0.00273857	1	0	0	0	0	0	19	12	4	0	0	0	2	0	18	18	269	1611
Mgam2-ps	-4.81433	0.697855	2.01036e-05	24	9	36	335	87	11	2477	2471	2711	3410	3683	3743	4066	4067	2861	6518	4135	5086				Asb13	0.314078	1.20529	0.00274962	605	866	292	641	708	737	781	831	887	883	930	996	866	1054	914	473	404	407
Snap25	2.52142	0.526805	2.0111e-05	73	67	61	34	49	42	52	69	58	13	13	26	4	16	40	7	3	1				Zranb3	0.434144	-1.65849	0.00275637	430	486	419	400	339	442	1075	1138	1039	339	325	337	608	579	695	2258	1856	1296
Cfh	6.27039	0.754695	2.04515e-05	2047	1481	1256	28	40	345	6	18	8	2	2	2	0	0	0	0	1	0				Reep1	0.543178	-1.67568	0.00278607	88	89	104	102	72	47	132	97	34	44	38	47	3	9	39	41	62	189
Mageh1	3.20065	0.588363	2.04515e-05	196	200	88	57	95	59	43	52	48	8	13	10	10	12	25	8	3	5				Sytl1	0.315961	-1.13585	0.00282838	2644	2211	1819	1161	1348	1290	249	292	310	230	279	252	338	286	476	647	501	307
Pip5k1b	-2.00026	0.377579	2.0514e-05	606	719	720	982	980	628	3048	3117	3008	3966	4605	4771	2461	2809	4053	3475	2961	2729				Id2	0.293134	1.13988	0.00283181	3985	3920	3562	2495	2923	3534	619	792	606	654	836	798	1169	1317	1164	472	423	197
Gm11735	-5.3741	0.825044	2.06442e-05	0	0	0	0	0	1	33	30	27	92	60	107	13	58	97	56	77	50				Bmp2	0.483033	-1.87991	0.00283576	919	1028	1237	717	367	522	684	683	571	858	899	694	347	123	566	3204	2327	1397
Ldhd	2.60411	0.466506	2.07212e-05	7477	7494	3249	2684	2659	3258	825	847	534	676	675	624	898	598	541	819	611	581				Ecel1	1.00193	5.98851	0.00283672	1	1	1	0	0	2	1037	1036	622	19	12	11	7	1	10	0	0	1
Thnsl2	-2.4505	0.427316	2.10695e-05	96	85	39	48	49	65	666	729	512	855	786	1006	129	169	359	108	124	149				Grm4	0.789994	4.08651	0.00283916	11	8	5	3	10	7	67	89	53	18	19	31	9	4	27	2	0	0
Papss2	-2.5077	0.468274	2.13502e-05	2581	2806	2954	2860	2168	2289	6293	9605	7381	15969	12338	16597	1408	1418	877	13728	30497	21993				Cyp2u1	0.694532	3.73336	0.00290754	35	15	28	26	30	34	127	166	188	969	978	1022	51	88	542	23	25	15
Cyp1b1	5.6466	0.657348	2.14466e-05	6542	5357	12990	8102	9461	11953	7	8	7	71	129	63	540	329	152	231	340	319				Gstm2-ps1	0.498907	2.10611	0.00290754	3393	4229	2397	2490	1269	1447	1498	1179	845	2004	2723	2805	517	627	472	606	561	298
Steap4	3.88656	0.701728	2.15669e-05	97	42	138	9	38	51	4	4	14	0	0	0	5	12	13	2105	2614	2171				Cabcoco1	0.498123	2.25017	0.00290996	81	55	80	106	64	43	270	333	269	81	111	112	59	50	88	30	16	36
Cela1	2.23786	0.434584	2.17823e-05	993	1404	569	1175	773	632	254	326	241	303	276	297	243	184	399	2369	2057	1030				Cyp2c66	0.856492	5.7936	0.00290996	37	90	25	3	0	0	8001	8616	7064	9414	8619	9304	59	345	928	13	29	48
Dap	1.63644	0.324298	2.18394e-05	6942	6822	6273	4766	4743	4442	1852	1964	1551	2123	2324	2045	1421	926	1356	4967	4195	3624				AC121299.1	0.762083	3.36497	0.00291108	27	24	90	25	37	66	22	32	12	9	7	25	33	35	29	0	2	1
Dnajc1	1.35386	0.274452	2.19335e-05	1863	1692	1824	1788	1785	1799	939	916	1046	560	623	921	1056	1020	1061	825	748	1129				Proz	0.769633	4.82814	0.00294461	7	10	0	0	1	0	178	274	132	497	438	491	2	6	28	5	6	1
Plk2	1.73596	0.321787	2.19448e-05	4096	3501	4515	5003	6648	6497	341	478	478	600	757	636	4741	2681	1496	3336	2783	2322				1700110K17Rik	0.651056	3.10924	0.00297647	231	200	191	52	32	54	128	126	131	36	73	52	114	131	62	6	6	11
Oas1f	-4.57162	0.736734	2.21212e-05	0	0	1	2	1	1	73	90	50	13	36	27	66	110	84	3	0	2				Arhgap45	0.432778	-1.84053	0.00297909	398	429	276	449	457	552	24	46	16	52	63	23	220	109	95	268	216	248
Uaca	-1.06225	0.212865	2.21451e-05	1647	1503	1581	1928	1992	1757	6841	6675	6251	4784	5299	5950	5144	6027	9434	5015	4461	4494				Slc27a5	0.908561	4.37819	0.00298857	0	0	0	0	1	0	13	11	7	21	16	26	2	1	2	0	0	1
Fam124a	3.23264	0.588935	2.22942e-05	37	36	28	8	16	26	1	3	6	3	3	4	8	5	10	224	245	186				Hpgd	0.442511	-1.69676	0.00298916	237	407	92	386	220	121	810	999	1087	944	804	802	440	490	948	2082	2014	2479
Igfbp3	4.72256	0.637653	2.25544e-05	490	284	1342	135	865	602	6	19	6	15	12	18	34	13	22	68	25	19				Gas7	0.617725	-2.74787	0.00303632	30	39	10	6	30	54	10	10	5	11	2	14	39	71	39	62	80	91
Prap1	-6.54508	0.711178	2.26276e-05	22	207	7	87	30	5	19325	24740	20465	27837	22260	25662	1326	713	3566	142	389	483				Zcchc3	0.617189	-1.72396	0.00303632	172	140	57	60	136	13	45	58	51	20	14	24	0	6	21	94	77	26
Fgd2	2.19151	0.443314	2.26326e-05	161	134	126	54	116	170	78	92	94	40	45	72	36	27	87	19	32	28				Cxcl5	0.88313	-5.12265	0.00303762	6754	5625	3556	328	1631	6269	0	0	0	0	0	2	17	26	1	216	117	57
Pinlyp	5.06561	0.659705	2.29094e-05	169	165	40	71	101	56	4	0	0	3	3	6	3	0	5	2	2	4				Fsd1	0.822691	3.31399	0.00306118	0	0	0	0	3	0	8	8	5	13	17	11	2	0	0	0	2	1
Zfp36l1	1.543	0.310226	2.292e-05	13941	12769	12332	7411	9206	10850	6074	5736	5634	3310	3603	3827	5245	4438	4567	4195	3237	3146				Itga5	0.353547	1.52017	0.00308702	1298	1266	780	1215	1525	1169	389	446	267	189	205	264	174	247	554	43	47	81
Cyp4f40	-4.80846	0.649927	2.29812e-05	43	53	32	10	9	4	636	575	413	1719	1937	1966	819	861	1083	540	507	459				9530053A07Rik	0.392231	1.56718	0.0031542	248	220	206	276	354	336	358	255	197	114	143	154	186	137	163	77	57	75
Rbks	-2.03372	0.388223	2.3291e-05	79	100	42	91	82	86	332	282	306	383	412	424	119	217	179	241	181	203				Zfp971	0.31001	-1.10462	0.00315556	142	165	121	108	81	99	224	243	314	116	122	180	176	230	289	300	247	325
Wnt9b	-4.86741	0.819588	2.35361e-05	0	0	0	0	0	1	29	30	18	22	15	24	7	4	9	0	1	1				Cdkl1	0.896242	-2.82262	0.00315724	2	0	3	0	0	1	1	9	4	0	0	0	0	0	3	24	20	12
Ckb	-4.19336	0.659086	2.36631e-05	89	61	119	541	767	393	2792	2718	2203	9856	9074	9752	778	1204	961	876	844	860				Erich3	0.645302	-2.65294	0.00316003	629	463	299	402	200	307	0	4	1	0	1	3	6	3	3	15	8	25
Olfml2b	6.02544	0.701822	2.37356e-05	389	233	165	202	760	324	3	4	0	0	1	3	2	22	3	0	1	1				Hyou1	0.280375	1.01115	0.00320988	10116	10226	14545	15309	14579	13766	5431	5339	5404	7958	8820	9492	9975	8673	5672	6998	5493	5409
Sil1	1.19931	0.245554	2.37749e-05	2697	2542	3396	2775	2258	2608	1660	1575	1237	1129	1272	1328	1461	1150	1418	1802	1737	1588				Pmepa1	0.368247	-1.60766	0.00320988	6039	5367	5807	7062	11827	10993	438	446	441	970	1149	990	5832	4645	1518	7510	5681	5747
Cyp2b13	-5.06307	0.685213	2.3838e-05	1	1	0	3	1	0	22	26	13	48	58	47	1	1	1	1	2	0				Upp2	0.324387	-1.17782	0.00321076	78	66	55	60	65	47	41	68	43	51	56	49	37	21	65	92	84	87
CT486005.1	4.89792	0.694695	2.40616e-05	415	614	69	89	55	54	6	2	5	7	5	1	48	33	29	170	124	132				Tcp11l1	0.437524	1.6215	0.00321119	355	276	239	363	606	552	46	56	75	37	34	45	252	128	70	30	41	17
Oaz2	1.38662	0.286265	2.44797e-05	572	542	568	458	661	617	357	475	424	236	236	245	303	329	403	376	393	362				Fkbp1b	0.538014	-1.91173	0.00321638	65	44	33	21	33	24	6	3	8	5	2	5	11	16	23	22	8	15
Gm10791	-4.64973	0.812592	2.47675e-05	0	0	0	1	1	0	19	18	26	19	7	21	12	23	6	4	4	14				Nkx1-2	0.918464	4.82382	0.00322835	0	0	0	0	0	0	45	39	28	17	13	18	1	2	5	0	0	0
Ctsh	1.60417	0.313839	2.47968e-05	12337	11769	11627	16849	22115	17442	4463	4975	4536	2928	3403	3422	5907	5230	4307	5608	4723	4001				Nckap5l	0.492818	1.88161	0.00324951	211	174	81	97	236	234	31	35	45	21	28	22	50	39	14	14	12	14
Il4ra	1.52032	0.292939	2.51726e-05	8326	7509	7426	7077	11627	11410	1315	1517	1243	1681	1919	1621	4933	3583	2162	3492	3050	3968				Rab26	0.739296	2.22789	0.00325372	4	3	8	16	19	4	1	10	5	4	20	23	8	7	0	1	6	4
Fth1	-1.83283	0.353227	2.56333e-05	15983	17083	14048	15350	13515	12980	49225	54887	53817	83211	77879	85316	13544	12235	19065	19592	17987	17610				Adprhl1	0.948759	3.99336	0.00326397	0	0	2	0	0	0	29	25	5	7	11	7	11	2	1	1	0	0
Pla2r1	5.67221	0.723444	2.57255e-05	195	236	202	52	56	317	8	1	0	0	0	3	7	6	5	0	2	0				2610318N02Rik	0.340568	1.21437	0.00326725	48	75	84	87	83	80	159	133	102	101	116	147	119	220	72	90	72	93
Arhgef19	1.07666	0.224234	2.5796e-05	1630	1494	1373	1117	1626	1788	1126	1271	985	783	787	934	526	682	708	714	670	616				Zfp37	0.377957	-1.4831	0.00327512	125	126	92	138	123	102	89	136	88	149	192	135	136	75	147	385	440	379
Gm10039	-1.27828	0.260118	2.58232e-05	623	690	607	754	885	660	1541	1583	1473	1849	1696	1960	830	1070	963	1469	1479	1387				Dgkh	0.499386	-2.18892	0.00327597	44	37	44	45	81	47	29	21	36	7	12	19	12	25	10	76	135	137
Fzd10	4.82541	0.844808	2.59196e-05	17	18	9	15	51	27	0	0	0	0	0	0	47	25	36	55	141	299				Il15	0.346743	-1.35027	0.00330398	97	73	79	53	73	83	174	177	139	231	246	268	190	116	203	662	556	463
Tcp11l2	2.57777	0.487053	2.59261e-05	1184	1195	873	741	532	871	300	345	328	126	129	114	346	181	346	312	207	160				Ccng2	0.308156	-1.20719	0.00332118	1912	2035	2110	2381	2266	1866	999	1255	1079	1744	1784	1649	3320	1745	1985	5615	4932	4134
Diras2	4.36916	0.637661	2.61338e-05	146	84	344	192	99	99	15	11	17	0	4	11	4	1	7	2	3	6				Myo7a	0.386814	1.51547	0.00332509	3668	3093	4568	1472	3074	3696	2807	3013	2813	3988	4730	4922	2366	2165	2372	1848	1339	1201
AC133889.1	2.53933	0.456333	2.6238e-05	69	91	76	62	67	66	12	9	7	14	9	5	27	19	15	22	20	11				Ms4a18	0.548025	2.4007	0.0033328	1	0	0	1	1	0	1513	1543	1428	3181	3243	3001	463	859	2081	127	209	358
Tcf7l1	3.84584	0.643586	2.64294e-05	264	284	105	56	86	100	22	18	18	1	6	6	4	9	8	425	277	66				Gm26744	0.949114	3.78593	0.00334597	2	4	2	3	5	2	8	9	4	4	2	5	3	3	0	0	0	0
Cbr2	4.29797	0.669397	2.65535e-05	312	419	351	157	33	47	7	5	2	13	16	9	53	20	80	10279	14339	10130				Hcst	0.459178	-1.62087	0.00335188	4	7	5	4	4	5	24	29	14	14	12	16	5	1	19	23	33	23
Depdc7	-1.52709	0.307301	2.66081e-05	294	286	211	420	403	376	1002	1201	895	989	953	966	769	699	829	199	165	163				Qk	0.629067	-4.54187	0.00335771	1632	1686	1810	1802	2185	1956	5	8	1	0	3	0	22	2	0	165	299	260
Zfp420	1.91923	0.398343	2.6656e-05	339	351	273	152	172	191	187	183	207	99	84	89	92	90	152	170	138	123				Gm17115	0.748373	3.10726	0.00339372	0	1	2	0	1	4	12	16	14	24	16	11	4	9	2	0	2	3
Cxcr4	4.89043	0.613487	2.66595e-05	281	256	405	309	327	376	9	6	24	2	3	4	1	8	1	0	2	1				Muc16	0.798984	-5.90392	0.00341596	172	200	144	59	132	245	0	2	0	1	0	0	8	8	0	499	118	23
Kazald1	2.34764	0.470664	2.66595e-05	66	102	82	45	42	61	39	28	37	15	36	29	18	11	49	62	44	32				Per3	0.329915	-1.15594	0.00341709	2042	2066	2828	1238	957	1366	1672	1912	1824	1120	1147	1122	839	809	1403	2382	2149	2025
Psph	-1.49274	0.318234	2.66967e-05	404	383	439	672	556	445	413	460	476	679	661	759	1559	1637	633	555	569	456				Cfhr2	0.920029	6.24606	0.00343113	0	2	0	0	0	0	100	106	122	23	30	72	0	0	0	0	0	0
Klhl24	1.53053	0.320014	2.67864e-05	3485	3503	3515	2196	2168	2619	2171	2363	2829	1226	1245	1426	1739	1872	2535	2111	1798	1646				Bend5	0.887785	4.2658	0.00345636	229	242	383	247	163	217	6	15	12	11	14	4	0	0	0	0	0	0
Fnbp1	1.88416	0.379744	2.70597e-05	1202	1183	1122	1104	1117	1222	607	713	690	260	294	326	477	443	600	683	522	382				A630001G21Rik	0.89261	-4.33109	0.00347542	3	4	2	0	2	5	0	0	0	0	0	2	0	0	1	12	32	7
Hdac5	1.16227	0.248549	2.71479e-05	2985	2989	2786	1743	1696	1808	2880	2901	2671	1846	2151	2299	1007	978	2171	2151	1779	1635				Chst12	0.434162	-1.72199	0.00348911	208	166	87	145	159	142	30	24	11	9	18	9	27	17	17	76	69	60
Manba	1.36065	0.274615	2.71953e-05	3937	3601	3224	2724	3366	3001	949	1094	1102	1284	1429	1255	1545	1114	1262	1794	1789	1681				Dscam	0.857662	-4.62027	0.00348911	0	1	0	0	0	1	0	0	0	1	2	0	22	18	11	35	8	57
Cpm	2.61572	0.512514	2.72259e-05	1683	1429	1518	505	541	812	447	587	593	228	223	237	130	114	251	242	153	82				Hoxa4	0.492084	-2.17037	0.00348911	0	0	0	0	0	0	10	10	10	13	10	19	8	18	18	44	40	55
Spdl1	-1.82647	0.381832	2.73583e-05	311	306	481	648	654	545	551	579	569	819	969	1123	979	1072	479	1253	1028	1068				Spcs2-ps	0.275798	1.01696	0.00349212	821	835	1022	1224	1032	1109	809	919	759	1135	1104	1138	838	697	765	708	593	524
Golgb1	1.03474	0.214437	2.77147e-05	7080	6493	7502	6919	6669	6612	3282	3617	3500	3323	3868	3946	6067	4477	6124	6814	5249	5300				Acp5	0.312714	-1.18099	0.00350131	1926	1910	1968	2176	2399	2627	1715	2148	1687	2698	2667	3172	1028	1303	1398	6104	6454	5266
Rhoq	2.03418	0.419857	2.83354e-05	1730	1703	2010	1358	1830	1830	1298	1296	1392	438	480	562	871	721	1527	1289	1554	1405				Pak3	0.841663	4.29306	0.00350177	28	19	97	104	297	169	31	35	56	8	9	13	2	2	1	1	0	1
Gip	-7.10207	0.760726	2.84024e-05	0	1	0	3	0	0	3343	3235	5062	1030	466	598	2	25	188	0	5	3				Ehd2	0.26876	-1.05899	0.0035294	1076	1046	893	1455	2172	1696	114	152	142	126	171	117	1606	1194	500	853	593	556
Peli3	2.89347	0.579965	2.84024e-05	70	80	59	19	17	24	18	30	16	11	10	7	10	13	33	23	19	47				Psmb8	0.453593	-1.49536	0.00353601	159	150	56	51	64	57	136	277	309	181	136	161	145	95	641	121	245	321
Sned1	3.25052	0.57855	2.85042e-05	522	518	378	131	205	212	76	77	59	12	23	25	90	55	75	149	148	99				Gm20149	0.848406	-4.75678	0.00356467	1	1	0	0	0	1	0	1	2	0	0	0	1	0	1	37	33	10
Shisa4	6.22852	0.66458	2.85361e-05	342	266	305	258	629	649	2	1	2	0	0	2	12	4	2	11	1	5				Clec14a	0.967016	-3.31409	0.003565	8	5	2	0	0	0	1	2	0	0	0	0	0	0	1	11	8	12
Nfatc4	4.97539	0.645709	2.8773e-05	655	347	370	99	155	391	5	4	3	1	12	9	16	16	7	6	2	9				Gm45716	0.459597	1.86267	0.00356562	0	0	0	1	0	0	152	163	155	70	71	94	50	84	103	10	16	29
Galc	2.15473	0.418942	2.88273e-05	2426	1769	2739	1023	1437	2304	571	680	626	429	464	498	419	435	411	329	512	649				Adcy3	0.737029	3.55897	0.00357505	530	401	160	138	267	154	30	37	20	27	25	30	6	19	31	1	0	1
Aifm2	1.04559	0.219334	2.94461e-05	704	681	604	477	478	485	341	397	424	329	343	380	435	352	477	528	471	438				Hcn1	0.68528	3.37897	0.00357791	0	0	2	2	0	0	104	78	103	42	20	34	6	9	20	2	2	3
Gm2379	6.05713	0.732886	2.94756e-05	70	96	47	20	21	30	0	0	1	2	0	0	0	0	0	0	0	0				Rubcnl	0.687619	-2.54729	0.00357791	32	13	53	22	33	21	1	1	0	4	2	2	4	7	17	15	13	5
A730020M07Rik	2.587	0.474151	2.96553e-05	89	89	51	90	106	76	9	13	9	19	16	8	46	27	42	20	15	24				Dap	0.281164	-1.02797	0.00360291	6942	6822	6273	4766	4743	4442	1852	1964	1551	2123	2324	2045	1421	926	1356	4967	4195	3624
Exosc8	-1.02383	0.2162	2.97371e-05	775	817	897	988	915	749	1349	1366	1311	1086	1126	1296	1638	2198	1095	1170	1030	1092				4933415A04Rik	0.938937	4.25165	0.00363813	7	2	1	0	3	1	33	21	27	9	6	25	3	11	14	0	0	0
Ppp4r1	-1.26456	0.262874	2.98548e-05	1586	1755	1226	1689	1998	1477	2444	2463	2523	3258	3397	3355	3679	3703	2841	3847	3245	3191				Plat	0.472554	1.76721	0.00363813	3277	2724	2091	2224	3462	3389	221	287	263	521	730	435	1735	445	546	394	162	161
Zfp704	1.78553	0.400214	3.02976e-05	2880	2734	2239	1373	1080	1490	2541	2882	3466	1198	1143	1567	939	1474	3275	845	1100	1540				Rhoq	0.371747	-1.28246	0.00363813	1730	1703	2010	1358	1830	1830	1298	1296	1392	438	480	562	871	721	1527	1289	1554	1405
Cobl	-1.96612	0.388235	3.03725e-05	1124	1065	2112	1907	1791	1438	3897	3937	4084	5912	5798	6222	5299	4609	4577	7720	6633	7031				C87977	0.844577	3.86079	0.00377986	0	0	0	0	0	0	13	18	14	199	235	256	12	12	11	5	6	5
Nup62cl	5.01257	0.610433	3.0898e-05	184	118	114	60	131	78	0	2	4	2	3	7	2	1	2	0	1	1				Snora73b	0.364369	1.17188	0.00377986	55	62	36	65	54	74	31	37	49	45	40	48	147	182	26	56	42	47
Chchd7	-1.08776	0.224051	3.0961e-05	385	316	358	320	295	269	741	787	782	824	853	900	376	443	457	375	355	357				Smox	0.354191	-1.44513	0.00381153	903	884	911	1242	1576	1346	456	471	459	755	1014	903	3054	1817	1553	3614	2981	3322
Ier5l	2.52859	0.45429	3.14987e-05	546	415	728	511	1215	1140	59	100	87	90	105	116	145	137	130	147	139	118				Stbd1	0.76424	2.83199	0.0038142	136	117	386	114	60	85	8	12	5	62	74	55	109	21	10	3	3	14
Spink1	-7.58364	0.867285	3.15965e-05	0	0	0	0	0	0	62	141	206	877	658	563	2	6	63	16	16	17				Ubd	0.700366	-3.11269	0.0038142	1	2	2	4	19	3	5	5	5	5	6	7	0	4	10	63	58	45
Gm49011	3.64497	0.593148	3.18773e-05	47	45	21	11	12	13	1	6	8	3	0	4	0	0	1	3	2	2				Cd36	0.896219	6.39996	0.00385723	7	14	0	3	0	2	206	219	230	833	764	686	0	2	16	1	2	0
Bmyc	1.34483	0.281597	3.18827e-05	675	658	615	525	619	608	506	537	428	252	257	314	260	268	323	191	224	216				Gm7208	0.458038	2.32262	0.00386233	0	0	0	1	0	0	412	422	385	253	280	220	6	10	119	4	27	10
Chgb	-5.81401	0.638607	3.20769e-05	69	79	2	25	9	6	15659	18812	26698	6454	5614	7647	740	1974	8137	1084	1372	685				2610318M16Rik	0.992505	3.50459	0.00388297	1	2	1	3	1	0	1	1	3	5	10	7	31	1	3	0	0	0
Hcfc1r1	1.58229	0.317893	3.24478e-05	3565	3392	3146	2617	2842	3440	945	1020	826	1094	1124	1198	1248	700	1049	1913	1987	1366				Defa29	0.885214	5.39819	0.00392242	0	0	0	0	0	0	145	125	269	454	159	351	7	11	905	0	1	0
Mfap3l	3.78643	0.597784	3.30599e-05	93	76	149	229	445	338	6	10	5	2	13	6	1112	632	666	1616	1045	1293				Vstm5	0.284262	1.08216	0.00393547	718	893	525	924	810	716	1250	1160	875	1169	1323	1220	749	873	1393	541	450	415
Pcdh8	-5.2377	0.787813	3.3326e-05	0	0	0	0	1	1	81	106	183	75	73	96	2	5	22	0	0	1				Nudt17	0.405267	-1.67271	0.00396307	194	165	68	141	147	120	18	26	28	15	36	21	116	98	45	194	131	89
Arhgap11a	-1.12225	0.239454	3.35093e-05	1516	1700	2197	2458	2211	2067	2837	2899	2908	2313	2438	2880	3646	4461	2100	3083	2610	2582				Prkab1	0.294647	-1.07699	0.00396307	6088	5746	4278	3719	3862	4047	3229	3105	2291	1548	1854	1748	4453	4285	3172	5342	4803	5174
Mfsd4a	1.9905	0.408717	3.36724e-05	4813	5246	4642	2645	1957	2926	1565	1773	2226	1409	1334	1249	1445	1282	2225	12888	7989	5581				4933417G07Rik	0.298692	1.06779	0.00401989	54	65	44	70	73	60	63	78	60	85	94	98	75	70	49	55	49	64
Obsl1	5.44325	0.611459	3.37559e-05	505	434	594	302	579	505	10	7	17	2	4	1	2	5	0	0	1	6				Sntb1	0.760645	3.32169	0.00403342	733	801	779	404	602	844	7	24	20	14	22	16	5	8	24	1	0	0
Nrg1	5.37309	0.587347	3.38553e-05	190	188	328	251	325	284	3	8	10	8	5	0	0	0	2	0	0	0				Clic3	0.46992	1.61109	0.00403922	745	795	451	649	1159	764	9	24	26	26	43	22	265	162	43	35	28	5
Cdc42ep1	1.62595	0.321621	3.39291e-05	4976	4849	5108	4862	6561	5743	1676	1810	1757	844	989	1127	2603	2825	1606	1921	1628	1437				Gm43672	0.329058	-1.15063	0.00405067	100	118	129	56	93	113	129	139	128	75	63	81	73	63	109	130	164	179
Ppp1r1b	-1.25028	0.252795	3.41932e-05	3642	4172	4212	4273	3072	3266	14055	14965	15923	9476	11511	13339	10026	14310	15207	18529	14534	11064				Qsox1	0.319343	1.23246	0.00405354	38099	38022	34748	20141	21272	26271	5798	6392	5409	7285	7485	7630	7072	6460	7301	4033	2809	2078
Cidea	4.17259	0.592188	3.42266e-05	216	216	117	237	246	109	0	5	13	11	7	7	10	2	7	17	15	11				Pde1c	0.797275	4.17874	0.00406301	22	53	22	17	8	8	46	54	83	25	22	35	4	21	16	0	2	0
Mdga1	5.03999	0.646655	3.4459e-05	472	387	352	118	200	365	6	1	17	4	1	5	15	4	4	5	2	4				Gm47183	0.909965	-4.62203	0.00408651	0	0	0	0	0	0	1	0	0	0	0	1	4	17	5	19	18	30
Mis18a	-1.17121	0.248354	3.4459e-05	299	306	419	457	499	461	636	649	607	530	611	661	761	954	536	698	583	594				Alox5	0.68955	3.77845	0.00413094	83	83	115	30	36	28	195	218	305	40	37	43	30	40	144	2	1	5
Celf2	2.68523	0.443953	3.47764e-05	1256	1173	1167	1838	2051	1885	50	60	64	47	123	96	243	97	51	70	81	134				Srgap1	0.311741	-1.23508	0.00414859	631	629	359	662	1023	661	97	114	104	82	122	83	704	424	221	723	442	355
Ano1	1.58026	0.305699	3.48414e-05	11349	11268	10859	11160	14924	13645	1567	1791	1172	1944	2745	2274	13258	13271	6587	8685	5346	4868				Gm2675	0.942094	3.53079	0.00416368	1	4	0	3	2	9	12	11	4	5	7	6	13	24	19	0	0	0
Dis3	-1.02486	0.218203	3.49309e-05	1223	1222	1208	1463	1523	1385	2138	2099	2302	1494	1708	1910	2480	3210	1615	1932	1631	1688				Trim36	0.270342	-1.04639	0.00416368	33	40	22	38	33	39	504	465	508	683	649	696	274	337	260	1678	1532	1293
AC125351.1	1.59563	0.317574	3.49823e-05	463	429	287	264	429	444	90	105	129	98	104	117	163	112	109	164	140	115				Gm10044	0.40222	-1.61902	0.00417426	25	52	19	48	43	43	28	23	19	16	16	27	49	42	32	91	69	107
Fam131c	2.85327	0.507843	3.49823e-05	217	191	113	109	153	136	21	31	29	5	20	21	48	22	33	25	20	9				Sytl5	0.554425	2.00929	0.00418434	409	482	435	302	286	306	33	17	15	38	36	24	222	225	73	32	2	5
Znrf1	1.72113	0.34538	3.57142e-05	2651	2687	2001	1697	2390	2306	916	981	912	438	494	536	887	911	648	1421	1091	1034				S100a13	0.328556	-1.25853	0.00418559	426	568	522	753	902	755	159	228	304	275	282	284	429	326	340	1124	802	696
Pof1b	1.19496	0.255647	3.58267e-05	2803	3044	2047	1655	1859	1872	1717	1720	1714	1640	1876	1632	1165	1296	2165	3474	3016	2467				Scn8a	0.843841	3.369	0.00418559	0	1	0	2	1	1	10	9	18	7	11	9	81	45	95	0	1	0
Pde9a	-1.67562	0.316258	3.58987e-05	213	140	170	118	190	189	2100	1914	1582	1122	1129	1167	511	567	1534	5240	3783	3378				Ptpn22	0.900571	3.53489	0.00419057	56	56	41	26	54	92	4	0	1	111	130	85	161	126	69	3	0	4
Sytl2	1.97414	0.403884	3.64133e-05	2576	2829	930	1139	1574	1211	706	801	973	577	707	568	1491	1301	2178	1553	1251	1392				Rhbdl2	0.265109	-1.01682	0.00421525	334	357	353	329	396	409	177	195	123	219	272	283	483	348	238	939	666	637
Erfe	-1.8989	0.389918	3.70227e-05	198	222	406	528	489	407	942	816	894	834	966	1080	1264	1646	976	937	690	599				Malat1	0.344383	-1.29981	0.00422982	15555	14156	14949	9605	10321	10509	3061	3197	4762	5421	5819	5221	11088	7157	8506	16285	12182	13489
Gm4714	-4.67416	0.823674	3.72719e-05	0	0	0	0	0	0	12	18	18	12	12	10	4	7	6	10	7	4				3222401L13Rik	0.625287	-1.98429	0.00424109	47	62	15	13	11	15	14	18	15	2	2	6	5	2	10	19	21	31
Amn	-5.0326	0.670919	3.7819e-05	0	4	7	24	17	12	829	997	839	921	1089	1124	131	253	516	9	97	77				Nt5c1a	0.685766	-3.6996	0.00426171	230	233	82	119	144	47	8	17	7	85	114	46	374	121	85	1775	1269	1293
Cenpu	-1.58247	0.331164	3.80758e-05	111	142	177	215	231	188	391	393	394	265	328	407	418	665	309	473	413	363				Hrh1	0.404612	-1.5773	0.00427906	71	60	41	27	58	70	18	28	19	24	29	27	135	86	84	68	104	103
Mttp	-4.2682	0.581081	3.81765e-05	858	760	441	294	381	551	23512	25887	22845	66716	66418	65836	279	657	3880	208	214	171				Mgat4c	0.632947	-3.20822	0.00428907	193	309	513	805	157	456	103	218	183	726	1034	690	3063	3001	2110	7461	8160	8921
Sdc3	3.49141	0.557361	3.81765e-05	329	256	489	249	633	668	26	57	30	12	19	12	42	37	22	25	33	20				Obscn	0.510886	2.11873	0.00429731	0	2	3	0	1	2	54	88	70	25	37	59	21	24	47	5	10	6
Strada	1.01317	0.213294	3.81987e-05	701	637	539	465	600	640	380	371	317	249	265	296	313	365	287	524	412	398				Syce3	0.919096	5.26755	0.00435683	0	0	0	0	0	0	14	17	26	19	20	33	0	0	1	0	0	0
Cavin1	2.11755	0.381764	3.82946e-05	5703	6381	6753	7412	9168	8053	350	458	260	641	903	697	4771	4173	1546	3904	3354	2949				Cbfa2t3	0.319319	1.19908	0.00440344	157	134	114	237	243	170	472	520	593	317	369	407	580	728	888	191	184	143
Rrm2b	1.06759	0.222124	3.83706e-05	486	403	356	393	418	420	163	155	227	158	155	176	252	207	181	296	254	228				Gm49421	0.847252	-4.38027	0.00441478	2	0	0	0	0	1	4	1	0	0	0	0	1	0	1	25	35	26
Galnt14	6.3309	0.822546	3.83707e-05	53	21	77	33	132	95	0	0	0	0	0	0	9	2	4	1	2	0				Mcoln2	0.32092	-1.08931	0.00441478	136	127	209	172	138	151	445	428	388	205	239	296	89	126	276	550	417	286
Stk36	2.73189	0.510793	3.85481e-05	265	206	158	81	149	209	51	47	55	15	18	26	45	35	42	47	37	23				Ifitm2	0.317478	1.27769	0.00448417	2014	1930	2988	1584	1779	1873	2108	1791	1361	823	827	1090	693	872	1269	338	362	373
Nhsl1	-2.0156	0.401296	3.88382e-05	1136	1234	1158	1332	1692	1440	2808	2956	2663	5063	5725	5771	5428	5646	5092	8702	7287	7075				Ppp1r15a	0.323422	1.07795	0.00450251	830	788	694	836	743	645	444	463	380	639	898	758	1654	659	334	769	655	607
Gm35019	5.05456	0.662765	3.91027e-05	116	90	302	309	113	100	2	2	2	1	3	5	9	5	5	5	16	22				Ptges	0.593362	-1.92049	0.00450892	7057	6224	6089	1667	2232	2335	31	78	15	41	65	47	78	23	295	142	165	72
Man2a2	1.28938	0.266194	3.9199e-05	2991	2470	2298	1934	2550	2599	1106	1129	1248	688	809	983	1989	1721	1424	610	647	756				Acox2	0.402026	1.44556	0.00459105	2396	2461	2100	2160	1498	1599	524	586	377	973	1156	1124	1963	1600	881	565	478	414
Stk32b	3.16981	0.679348	3.92024e-05	255	226	68	11	40	11	78	95	30	9	10	7	2	0	21	0	1	2				Adrb2	0.420506	-1.83953	0.00460278	19	17	15	13	24	18	1	6	4	6	10	8	48	43	13	61	40	45
Gm7823	1.67507	0.347405	3.93694e-05	256	266	308	224	186	267	140	174	174	121	87	143	33	74	70	8	10	10				Jak3	0.368692	-1.21173	0.00460278	2200	2285	3184	1448	1474	1967	731	842	855	313	306	388	255	230	451	888	867	735
Defa35	-5.38579	0.836023	3.94261e-05	0	0	0	0	0	0	56	82	121	135	90	126	14	26	284	0	1	1				Nova2	0.570764	-2.15753	0.00462795	127	195	76	107	214	189	6	17	19	3	5	4	16	16	21	83	37	22
Rnf181	1.25545	0.256265	3.94618e-05	8955	9187	8150	8821	9625	9639	2227	2376	2223	3105	3350	3283	3049	2841	2275	3586	3245	2814				Hk2	0.344612	-1.29672	0.00463111	4530	4850	8661	5223	4834	4853	2704	2653	1927	3201	3771	3643	4152	3353	3635	8981	8870	9181
Paqr6	4.27272	0.620545	3.98015e-05	111	110	105	83	86	109	4	10	11	1	0	0	5	6	3	8	2	3				Cavin1	0.334996	-1.35234	0.00468384	5703	6381	6753	7412	9168	8053	350	458	260	641	903	697	4771	4173	1546	3904	3354	2949
Rmnd5a	-1.05378	0.220789	4.01066e-05	3412	3779	3785	3830	3780	3688	6885	8098	7933	9044	8723	8601	6834	6397	7363	7597	7240	7440				Usp17lc	0.75184	-4.60984	0.00469699	1	0	0	6	0	1	1	1	0	2	0	2	5	6	2	52	62	50
Aldh6a1	1.60356	0.348737	4.02547e-05	2657	2571	1887	1328	967	1313	1829	2100	1873	1120	1070	1121	590	573	1210	1085	1114	997				Myt1	0.66497	3.31408	0.00473679	4	1	1	0	0	0	146	151	252	35	45	60	24	54	90	4	4	4
Tbc1d30	1.06683	0.226338	4.02852e-05	624	697	770	753	619	693	403	418	388	381	419	475	374	378	505	715	558	522				Crym	0.888471	4.60222	0.00474421	2	1	4	1	0	0	87	77	46	20	26	9	4	4	10	1	0	0
Slc26a2	1.6208	0.329669	4.03592e-05	13090	16041	7206	10190	14863	17743	4718	4368	3873	4097	4304	3798	5401	5229	5181	20917	18821	17498				Amn	0.676856	3.14712	0.00479704	0	4	7	24	17	12	829	997	839	921	1089	1124	131	253	516	9	97	77
Zrsr1	1.43159	0.295185	4.038e-05	477	450	486	345	292	316	132	156	145	163	158	154	258	249	227	298	294	259				Matn2	0.563185	2.02195	0.00479768	87	100	122	507	477	456	157	168	119	186	233	301	340	589	266	103	63	66
Mpp4	-3.62918	0.541804	4.07157e-05	2	6	4	8	3	6	761	834	381	345	213	329	12	18	138	4	2	1				Bmf	0.420669	-1.40633	0.00482629	890	787	704	207	389	468	470	622	464	561	373	376	227	127	557	631	683	837
Slc26a9	9.12828	0.674932	4.07292e-05	4552	4105	3764	5290	6424	4009	0	1	2	3	2	0	9	0	0	1	19	4				Rab34	0.316783	1.15245	0.00484445	1141	982	1015	814	874	880	108	140	67	63	112	86	208	148	101	66	69	46
Gfra4	3.28545	0.563623	4.10808e-05	77	75	220	108	150	222	13	28	12	9	9	17	34	20	37	13	13	16				Gspt2	0.593241	-3.5628	0.00485074	111	89	67	167	141	60	23	17	23	2	8	2	2	3	0	239	251	231
Glb1	1.09723	0.238505	4.13112e-05	5146	5531	4922	4475	3357	5084	4955	5234	4881	3939	4403	4807	2457	2083	5119	4989	4613	5163				Wnt10a	0.842795	2.93024	0.00489068	289	195	509	293	1300	992	3	0	0	6	6	8	74	56	21	1	0	0
Tusc3	1.0397	0.218267	4.13319e-05	2037	1906	2100	2181	2767	2568	980	1269	1213	871	927	907	1949	1809	1681	1590	1352	1386				A930004D18Rik	0.457003	-1.91982	0.00495148	136	179	172	105	211	194	5	9	0	6	5	4	43	38	10	57	44	31
Aph1b	1.74689	0.354223	4.15007e-05	423	360	429	297	312	400	100	137	109	128	134	160	156	83	164	304	288	225				P4hb	0.380692	1.4191	0.00496735	45936	46244	62608	61509	53689	53082	49162	54682	48102	101339	102948	100584	32236	31745	35774	37694	34476	30237
Ada	-3.03835	0.560315	4.16692e-05	81	167	112	248	401	208	623	810	515	1801	1747	1152	662	536	482	813	536	405				Rgs2	0.515966	2.38261	0.00503827	210	138	228	44	221	157	212	234	216	92	124	124	135	176	591	4	16	21
Olfr1372-ps1	4.26578	0.584735	4.16896e-05	1627	1145	1009	554	1238	1104	6	16	6	21	39	9	199	48	27	47	26	23				Slc43a1	0.506277	2.21143	0.00503842	64	53	79	90	43	37	172	179	180	63	96	112	116	221	289	6	34	11
Pon3	1.30001	0.281472	4.16939e-05	1206	1084	867	730	771	775	869	973	914	514	569	652	926	709	1466	1067	1159	1417				Zfp974	0.30517	-1.04586	0.00503842	500	470	402	309	300	318	296	313	379	136	176	208	290	253	369	490	334	361
9130015G15Rik	3.73994	0.715164	4.17327e-05	44	79	6	13	6	5	5	7	5	0	0	0	0	0	2	0	1	0				Cyp4f16	0.527103	2.10536	0.00511029	731	712	521	566	834	677	1498	1462	1265	5509	5121	4803	675	705	889	865	845	770
Heph	-4.79559	0.662963	4.22413e-05	144	209	231	350	15	16	4479	5191	5318	10192	9647	8848	6130	5282	6836	9696	8277	7415				Ism1	0.843208	-7.30307	0.00512613	1	4	4	15	43	36	0	0	1	0	0	0	7	8	0	546	327	180
Ric1	-1.25242	0.260973	4.23498e-05	1172	1217	1110	1042	1137	1059	2312	2450	2062	2917	3102	3138	2283	2090	2323	2483	2056	2037				Dclk2	0.540155	1.62783	0.00512936	4	4	4	28	17	17	13	24	20	16	30	22	54	45	8	15	17	17
Duox2	3.78612	0.622172	4.26456e-05	18032	15882	10568	4173	5208	7560	270	359	371	1511	1337	962	760	618	1656	1950	2393	2882				Rasa4	0.560407	-1.86115	0.00512936	170	188	87	36	18	18	2905	2771	1517	1199	1416	1439	1557	1350	5160	2849	3073	3655
Gm7420	-3.30284	0.612682	4.26456e-05	2	1	2	4	3	0	37	32	36	15	15	29	25	51	28	26	17	19				Mtmr6	0.289651	-1.04381	0.00516836	2834	3070	2337	2425	2051	2058	1830	1981	1897	2847	2812	2660	2304	2110	2479	6122	5271	4386
Pcna	-1.36404	0.286737	4.26456e-05	645	835	894	1096	1236	1072	2171	2078	1942	1801	1906	1943	1984	2674	1689	2163	2339	2380				Grik4	0.95452	4.85541	0.00517012	1	0	0	0	0	0	48	49	50	18	6	13	3	1	6	0	0	0
Fam69b	1.08374	0.230352	4.27429e-05	249	201	186	205	216	215	120	161	110	89	109	95	188	173	184	409	407	381				Slc3a1	0.584143	2.78194	0.00526799	10	9	12	5	16	18	2610	2996	2578	7283	6146	6117	225	254	2235	420	261	186
Gm47813	-1.97174	0.409265	4.27552e-05	17	33	39	24	31	22	82	57	75	48	58	60	72	79	27	76	57	46				Gm5780	0.352805	-1.44434	0.00533666	132	93	202	155	207	223	16	10	19	24	20	21	134	110	36	163	114	104
G6pc	-8.96369	0.899154	4.28502e-05	0	0	0	0	1	0	330	503	399	3045	2803	2888	0	2	4	0	0	0				Prodh	0.310676	1.18429	0.00533904	599	507	431	316	450	411	727	799	804	342	377	427	272	317	321	217	218	164
Lamb2	3.0525	0.570461	4.29066e-05	7004	6850	7066	3671	4723	5503	1606	1775	1550	262	351	336	1433	1451	1513	1815	1491	1391				Gm3555	0.301034	-1.12357	0.0053406	345	384	453	413	381	387	146	162	162	248	282	275	266	256	202	712	666	611
Frs3	1.51707	0.333612	4.30117e-05	255	225	176	101	117	131	218	165	175	139	116	162	37	64	112	71	64	68				Gbp9	0.753903	-3.96208	0.00534878	44	12	85	40	209	149	0	5	0	4	3	0	195	34	33	135	102	93
Epor	6.11911	0.708247	4.32386e-05	115	102	135	183	150	150	0	1	0	2	0	1	0	1	1	1	0	1				Gm9347	0.34563	1.18474	0.00544585	191	164	207	343	504	332	220	214	188	184	195	224	369	436	220	172	133	150
Flywch2	1.34092	0.28589	4.38192e-05	337	332	236	295	345	255	153	209	165	173	191	227	154	178	287	263	291	304				Axl	0.778575	2.79372	0.00546918	755	408	273	242	625	755	2	11	3	0	11	4	48	16	5	2	1	0
Cyp2c39	-5.69389	0.799574	4.38423e-05	0	0	0	0	0	0	37	41	35	32	38	42	1	0	4	11	8	3				Eci3	0.539361	2.27956	0.00546918	49	45	43	25	43	21	109	150	129	331	256	258	35	12	39	28	31	55
Sgcd	7.56662	0.794283	4.41309e-05	215	212	247	39	52	74	0	0	0	0	0	0	0	0	0	7	4	0				Gm21885	0.786053	4.25243	0.00549285	2	0	2	2	1	1	355	359	222	2072	2121	2002	15	50	224	25	14	35
Kirrel	3.76566	0.523071	4.42149e-05	592	584	714	581	948	683	2	3	11	9	28	12	68	25	10	105	55	40				Fgfr3	0.484319	2.34718	0.00552617	1218	1373	1027	497	668	728	1631	1767	1639	459	465	582	215	459	683	134	127	42
Abca3	1.08906	0.228575	4.43165e-05	6016	6388	6901	5363	5993	6075	2308	2404	2281	2665	3003	3001	3731	3229	3246	4849	4124	4456				Aqp3	0.855279	3.77113	0.00553962	258	341	100	25	23	27	11	19	11	38	26	41	6	2	0	1	1	1
AC154378.2	-1.51468	0.321016	4.43165e-05	58	65	55	67	66	49	90	67	94	104	124	121	102	100	56	132	101	83				Cavin2	0.77406	2.97572	0.00561724	2233	2287	2702	2535	2341	3058	2	10	16	1	5	2	12	7	0	3	0	0
Insl3	4.19157	0.704009	4.43811e-05	24	20	46	9	4	12	1	3	4	0	0	1	1	2	6	4	6	7				Gm33051	0.954625	-5.55412	0.00562289	0	0	0	0	0	0	0	0	0	0	0	1	1	0	1	15	51	40
1810028F09Rik	-6.02638	0.83784	4.4661e-05	0	0	0	0	0	0	98	72	133	25	26	22	3	4	3	3	2	2				C2cd4a	0.94322	-3.83024	0.00562846	5	8	0	5	25	0	2	1	0	0	0	0	11	65	102	38	14	10
Sipa1	1.28459	0.268893	4.4763e-05	660	654	657	656	674	562	352	393	303	179	212	287	319	386	302	375	316	259				Pitpnm3	0.47306	-1.72714	0.00562846	2761	2725	2156	1582	1661	2096	427	526	405	109	147	166	978	533	568	1148	1015	971
Gm2996	-2.28412	0.441174	4.50043e-05	13	9	9	12	5	6	86	64	64	37	43	50	39	40	37	57	40	47				Cyp2c52-ps	0.531067	1.58639	0.0056421	4	1	0	1	2	3	17	9	13	25	43	35	70	76	15	18	15	16
Abhd4	1.25618	0.261697	4.55771e-05	5815	5313	5252	5350	6545	6353	2017	2149	1908	2502	2506	2318	3225	2286	2920	4648	3968	4230				Neu1	0.276484	-1.00004	0.00573087	6008	5767	5882	5990	5877	6343	2347	2690	2242	3577	3785	3580	6194	4168	4711	8373	8097	7490
Slc17a9	2.68157	0.503535	4.59992e-05	900	956	424	394	282	319	108	88	52	69	92	66	1756	996	1129	4715	3957	4608				Ctsl	0.320417	-1.17187	0.00573739	15875	13746	10546	13133	19101	17706	1694	2066	1793	2823	3034	2735	5870	3750	4385	8967	7249	6331
Neu3	-3.28727	0.529507	4.60398e-05	50	46	65	40	42	68	755	805	505	1346	1166	1546	19	15	55	16	15	15				Nox1	0.668842	-3.38239	0.00576353	3	2	0	0	1	2	78	111	125	526	565	523	1692	2079	2535	6393	4460	1509
Pycrl	-1.09649	0.226325	4.60398e-05	639	633	543	529	724	572	2610	2622	2506	1515	1700	2131	605	978	1102	1107	1014	847				Amz1	0.455835	1.65604	0.00576887	11	13	7	9	6	10	31	36	21	23	26	25	44	23	30	13	8	7
Trerf1	3.2698	0.61759	4.60398e-05	92	128	40	4	13	23	17	19	18	7	6	3	0	1	2	1	1	0				Plcb1	0.483628	2.14443	0.00579762	326	286	706	309	258	326	136	112	122	74	51	66	33	70	241	10	6	7
Zc2hc1c	2.80844	0.491479	4.61051e-05	143	148	88	83	91	107	16	9	16	11	9	11	22	15	10	40	29	15				Pklr	0.558141	2.25886	0.00580365	1404	1844	1194	1510	1698	1087	9472	10572	10723	42237	41088	44919	5088	4856	8452	5790	5096	4638
Hspb1	5.58868	0.82895	4.69346e-05	101	77	30	20	31	34	0	0	0	0	1	0	12	10	3	8	12	3				Aph1b	0.307608	-1.08004	0.0058178	423	360	429	297	312	400	100	137	109	128	134	160	156	83	164	304	288	225
Rab27b	1.73236	0.349483	4.69822e-05	4295	5278	2988	3731	3277	3087	1315	1416	1550	754	923	849	1895	1626	1318	1156	760	698				Kiz	0.318398	-1.06932	0.00585034	823	847	636	633	505	579	728	701	710	310	303	350	421	502	547	809	845	755
Gm15544	-1.34023	0.288351	4.69936e-05	239	236	285	299	317	266	617	523	412	339	389	447	787	973	435	286	229	274				Anxa4	0.293844	1.0417	0.0059013	22155	21776	22961	21911	19864	19484	34251	35980	27290	48123	53708	51649	49291	55191	55229	24513	22686	21441
Zc2hc1a	1.78834	0.361479	4.70335e-05	443	413	447	370	508	464	183	139	195	109	98	76	189	151	156	276	190	186				Dpf1	0.668902	1.68837	0.00592446	7	12	25	30	36	29	2	0	1	7	5	10	7	3	1	6	1	3
Stoml1	1.39551	0.29968	4.73116e-05	739	713	504	379	457	611	452	482	475	292	292	282	292	257	406	392	333	289				Trim12c	0.318796	-1.14135	0.00592506	412	453	389	344	467	478	239	249	222	381	348	293	359	258	395	617	715	710
Plekhg1	1.46146	0.324756	4.74774e-05	536	601	351	322	370	365	542	554	632	249	262	306	131	139	301	636	599	558				Nat8f4	0.426472	1.71478	0.00594279	231	259	178	180	162	160	817	975	981	1921	1585	1721	236	205	540	244	271	363
Natd1	1.11306	0.23847	4.79348e-05	702	710	831	655	863	754	546	518	562	336	430	423	432	329	513	660	597	599				Ptprr	0.382401	-1.37571	0.00594279	1903	1859	1614	1967	1152	1621	759	892	681	756	691	544	1191	369	1060	1814	2043	1706
Fam71e1	2.73684	0.606031	4.79723e-05	101	84	55	7	24	14	62	32	46	14	8	13	1	2	14	32	41	17				Trbc1	0.870229	-5.01701	0.00595422	1	1	0	0	5	2	0	0	0	0	0	0	12	17	2	42	15	27
Map3k13	-1.1907	0.248476	4.81064e-05	396	463	549	438	431	456	1198	1142	1287	1343	1277	1425	674	745	901	722	616	494				Meis1	0.770234	-3.46985	0.0059751	325	311	247	227	205	156	1	1	0	0	0	0	3	4	0	21	21	3
Slc37a4	-1.21838	0.254055	4.87429e-05	862	831	1171	922	973	1075	2411	2718	2517	2650	2814	3193	939	1089	1281	1571	1376	1412				Odf3b	0.504768	2.64324	0.0059751	21	24	18	12	17	14	242	325	165	95	87	75	3	9	38	9	9	4
Hspd1-ps3	-1.19657	0.25596	4.90272e-05	3952	3913	4931	6088	5979	5177	9054	9434	10652	7398	8112	9688	7736	10393	6449	8367	7145	6750				Hpn	0.651398	3.32733	0.00604316	2831	2942	2525	673	1517	1732	130	155	44	24	33	47	12	47	20	3	7	4
Cyp39a1	1.77905	0.382448	4.96357e-05	1568	1445	1112	970	1098	1006	1055	995	1068	394	407	451	614	593	957	694	761	675				Dnase1	1.00354	6.92503	0.00608722	1	0	0	0	0	0	101	159	279	1810	1058	1123	0	0	4	2	0	0
Slc2a5	-5.00705	0.651346	4.97835e-05	52	42	38	22	59	21	1054	1257	870	5860	4508	5520	26	47	134	15	29	49				Gm20056	0.295977	-1.06956	0.00608722	1809	1746	2211	2095	2265	2042	799	1046	885	1440	1362	1335	1646	1321	1443	2988	3155	3019
Cgref1	-2.81645	0.500328	5.02214e-05	556	441	368	294	318	267	2045	2358	2049	5461	4706	5000	604	807	1016	622	610	642				Gm5217	0.31473	-1.13222	0.00613191	85	105	81	112	117	108	43	50	35	59	62	50	53	39	60	143	116	113
Cish	2.17465	0.451416	5.06552e-05	1012	968	917	438	793	737	455	546	512	203	167	186	296	232	423	408	378	282				Limd2	0.409072	1.57656	0.00616985	942	898	826	803	1539	1284	145	177	218	81	88	74	222	198	183	53	37	51
Gm8291	1.66244	0.357293	5.08291e-05	54	69	55	52	37	45	36	44	44	23	25	24	26	33	50	33	26	29				Pdzd4	0.507543	-1.78749	0.00618588	66	59	27	19	59	34	9	21	13	13	16	17	76	40	134	26	39	55
Fam117b	-1.45179	0.301531	5.09279e-05	1417	1305	1564	1375	1446	1382	3226	3158	3054	4042	4241	4830	3436	4293	3737	4350	4434	5364				Gm7901	0.358089	1.19554	0.00623133	538	492	604	1105	1522	1183	785	718	657	581	668	793	1230	1349	625	620	474	559
Hmgn3	3.40472	0.577272	5.10535e-05	501	610	325	189	211	206	94	130	149	42	38	25	0	4	2	0	7	1				Lor	0.534287	-2.86601	0.00624996	13	22	20	48	89	66	10	21	10	11	32	24	673	557	85	875	491	161
Gm379	4.05288	0.733096	5.18931e-05	17	20	15	13	19	11	0	0	0	0	3	0	12	9	12	42	33	19				Serpinb6b	0.557098	1.5859	0.00628266	4922	3851	3591	1702	3742	5717	13	29	24	51	96	72	1590	276	53	101	66	29
Gm7932	-4.81175	0.732459	5.19266e-05	0	0	3	0	1	1	116	96	115	30	36	51	8	22	18	47	34	11				9130409I23Rik	0.904144	2.86483	0.00632169	0	5	3	13	7	2	2	0	1	27	22	24	2	1	0	3	0	2
Lancl3	2.6048	0.466594	5.19266e-05	280	303	388	321	653	355	33	54	59	14	27	35	233	165	107	59	29	37				Bfsp1	0.506741	1.90166	0.00632742	52	38	8	78	91	72	156	154	122	140	178	181	81	102	90	60	46	40
Cyp2c67	-6.50371	0.849213	5.24339e-05	0	0	0	0	0	0	110	174	154	176	194	222	4	0	37	34	49	7				Lrat	0.606403	3.34582	0.00632742	3	0	0	0	0	0	462	440	491	153	109	159	6	15	84	2	15	2
Nedd4	1.05703	0.227263	5.24952e-05	46142	43398	51903	42998	50214	51226	32485	34905	35475	19730	22141	24581	29907	31804	32288	39340	32975	31921				Raet1d	0.538538	-2.82617	0.00632959	1	3	1	4	6	2	7	9	5	5	3	4	13	3	5	83	54	47
1700088E04Rik	2.08788	0.409907	5.28479e-05	220	189	161	124	130	124	42	32	24	44	41	40	55	31	44	81	62	66				A1cf	0.378353	1.37438	0.00634077	0	0	0	0	1	0	1413	1477	1581	1913	2022	2024	292	365	833	290	470	445
Tubb4a	2.26411	0.433015	5.29181e-05	221	168	151	131	126	176	37	39	20	22	40	30	68	28	46	30	25	25				Gal3st2b	0.617515	2.86308	0.00634077	2	0	0	0	0	0	68	56	81	36	25	44	2	9	9	2	5	3
B3galt5	-2.20393	0.423383	5.30645e-05	5	20	9	6	5	4	51	69	49	50	46	74	41	45	59	18545	15700	12220				1810028F09Rik	0.751001	3.65522	0.00636225	0	0	0	0	0	0	98	72	133	25	26	22	3	4	3	3	2	2
Pcna-ps2	-1.33434	0.284814	5.31919e-05	888	1047	1163	1464	1637	1429	2509	2475	2408	2257	2364	2598	2574	3591	2167	2903	3229	3037				Rasgef1a	0.560368	-2.32789	0.00638718	127	123	128	108	173	203	15	4	9	1	7	0	35	19	15	88	45	31
AI481877	2.51945	0.456705	5.32131e-05	333	296	465	272	274	277	36	43	35	24	23	28	155	47	46	423	318	278				Ppp2r2c	0.819005	2.58285	0.00640542	20	10	9	40	54	68	0	5	2	5	4	6	47	10	3	0	2	1
Sgsm2	1.33602	0.285968	5.33015e-05	2198	2291	1634	1374	1829	1910	1372	1358	1233	722	789	816	1063	983	1178	1726	1314	1198				Glipr1	0.502084	1.73608	0.00644167	2733	2027	2879	2503	5018	4283	137	211	239	101	151	127	538	125	78	137	155	37
Fbln2	5.37804	0.625763	5.37217e-05	6317	3980	7880	7016	18385	18195	45	51	57	33	32	30	708	158	35	24	65	4				Rilpl1	0.382851	-1.30888	0.00644167	331	373	298	244	259	432	20	16	25	10	16	24	55	36	50	34	59	47
Gal3st2c	-5.60586	0.80503	5.37296e-05	0	0	0	0	2	0	66	75	58	127	111	125	4	4	27	17	14	3				Fgf2	0.834039	-5.50699	0.00648506	0	0	0	5	3	0	1	1	0	1	2	7	1	0	2	455	222	47
Dnah9	2.95001	0.622735	5.37905e-05	172	74	74	19	51	66	51	53	63	8	9	21	0	5	14	1	7	0				Olfm1	0.709405	3.21598	0.00650481	2	3	10	9	11	19	67	82	81	30	17	32	5	23	16	3	5	2
Ifit2	-2.76285	0.520263	5.39575e-05	6	17	12	20	34	9	127	104	115	93	84	109	112	208	108	248	348	514				Slc9a4	0.334503	-1.23066	0.00650482	14694	15340	8511	10519	10212	9609	295	299	259	371	356	281	1612	850	561	1769	1331	854
6430562O15Rik	5.81279	0.754175	5.41314e-05	61	65	31	9	25	32	1	1	0	0	0	0	1	0	0	2	1	2				Plce1	0.499249	-1.5393	0.0065408	2475	2755	1840	464	419	706	1983	1999	1873	1087	1261	1199	762	998	2125	3234	2216	2149
Zfp354b	2.94274	0.616342	5.44946e-05	28	26	10	4	6	14	16	6	11	3	2	5	0	1	10	5	3	1				Mrvi1	0.51427	1.91809	0.00654196	4	4	15	12	10	10	48	33	34	76	58	71	24	29	26	14	14	20
Ceacam2	-1.78165	0.363089	5.47504e-05	36	31	48	54	55	56	156	143	141	156	185	153	575	523	569	929	873	1377				Ccdc190	0.826978	4.18912	0.00658772	37	24	11	15	9	6	64	60	47	17	12	10	5	4	3	1	1	0
Fkbp5	-2.93858	0.563029	5.4828e-05	78	118	138	241	313	199	341	389	404	1084	1379	1165	2575	2425	1503	2178	2728	3283				Cpt1c	0.603758	1.80656	0.00668571	203	123	104	66	82	149	14	9	8	14	16	16	193	38	9	15	12	3
Pisd	-1.11837	0.235251	5.5056e-05	765	733	562	582	591	667	1619	1721	1708	1879	1939	1988	1050	1505	1553	1268	1130	1001				Pcdhgc4	0.553214	2.33674	0.00675295	18	32	23	30	33	28	63	67	82	17	31	33	15	30	60	5	6	3
Bmp6	2.89912	0.551131	5.51439e-05	74	51	109	31	61	104	20	14	20	8	18	15	32	24	75	22	12	6				Sec14l1	0.310505	1.10822	0.00679818	5761	6217	7348	6872	9143	8610	2451	2624	2441	3692	3600	3798	1687	2236	2091	2253	1665	1355
Lrtm2	3.92442	0.635239	5.5186e-05	47	43	23	34	33	27	0	3	7	0	1	1	5	4	4	9	9	5				Plcd4	0.875308	-3.51761	0.00684657	67	60	97	7	23	53	0	1	0	0	0	0	3	4	1	12	12	6
Tns1	5.1901	0.730287	5.68825e-05	698	561	278	27	40	53	9	10	9	6	4	2	7	0	9	1	6	0				Hsd17b2	0.677172	-2.24063	0.0069665	73	117	15	4	4	5	1596	1741	1372	1156	1330	1197	790	570	3403	4033	3933	2819
Wdcp	1.11794	0.245041	5.75721e-05	243	226	245	209	210	273	209	224	216	113	153	201	105	138	187	196	188	183				Prr36	0.471655	-1.27722	0.00696961	105	147	134	46	26	59	40	54	40	23	17	30	7	12	35	32	41	33
Phldb1	1.64844	0.359403	5.76015e-05	3603	4037	2388	1489	2005	2053	2191	2223	2144	1037	1256	1633	497	588	908	2446	1894	1456				Phlda3	0.31452	-1.14679	0.00697018	2193	1950	2177	2216	3815	3093	203	304	389	318	433	358	1571	1136	951	1549	1206	859
4921507P07Rik	2.15022	0.448494	5.77779e-05	133	149	82	85	87	107	53	69	75	31	19	26	47	36	66	53	45	42				Raet1e	0.659422	-2.72269	0.00697228	80	68	47	7	12	2	106	138	96	61	94	95	17	8	13	893	712	428
Phlpp2	-2.40926	0.472593	5.85725e-05	298	312	327	334	374	351	650	820	852	2008	1863	1838	617	746	579	1566	1053	971				Tmem108	0.464857	-1.65022	0.00697228	214	214	326	256	106	108	120	120	48	72	78	99	64	32	80	221	270	248
Usp2	-1.80314	0.349011	5.87907e-05	30	27	31	24	25	35	340	346	222	235	210	167	59	92	170	42	42	46				Ahrr	0.558761	1.83954	0.00705345	61	38	88	57	33	33	28	19	21	23	31	25	66	46	10	8	5	24
Ifrd1	-1.78369	0.38507	5.89322e-05	1283	1176	1018	1688	1356	983	1254	1345	1268	2265	2959	2349	4879	3473	1846	4594	3622	2861				Rfx6	0.633331	3.16729	0.00706113	5	3	2	0	0	1	323	293	408	88	85	107	19	89	88	13	7	8
Rnf169	1.23398	0.26071	5.9602e-05	2004	1689	2032	1536	2026	1996	854	881	998	541	644	600	1448	1281	1055	1139	985	832				Ttbk2	0.325857	-1.09644	0.00708833	356	325	188	212	281	291	200	220	323	133	138	136	253	227	329	427	268	307
Gm44223	-3.94796	0.573991	5.97907e-05	14	7	10	3	7	6	945	946	968	198	210	327	30	23	111	86	90	47				Insl3	0.752161	-2.14425	0.00713249	24	20	46	9	4	12	1	3	4	0	0	1	1	2	6	4	6	7
Arhgap19	-1.48136	0.321077	6.05939e-05	424	384	570	846	744	617	1064	1018	954	927	1028	1165	1387	1782	936	964	771	876				Carmil3	0.77102	4.27409	0.00713264	20	15	5	6	0	1	204	186	175	42	43	60	7	18	29	2	3	0
Arl4a	-2.16922	0.423913	6.07673e-05	222	196	153	245	254	237	721	783	662	1257	1382	1371	1193	1196	1575	1940	1999	1919				Dclk1	0.584016	3.46302	0.00719295	1151	852	2189	314	691	666	1108	1137	1455	276	191	235	72	154	1387	8	9	21
Faap24	-1.38706	0.306878	6.13137e-05	175	205	204	322	368	244	293	309	252	310	357	359	439	572	228	469	407	415				Rps6ka6	0.415084	1.45018	0.00719295	359	275	391	728	587	518	607	603	497	438	458	578	651	836	550	470	246	110
Vnn3	3.09059	0.712649	6.13137e-05	53	55	26	1	3	1	15	17	10	3	5	3	0	2	29	0	0	0				Fbxl16	0.453818	1.79236	0.00731605	42	40	40	42	48	35	79	71	80	27	27	40	22	37	42	9	10	12
Cped1	-4.98894	0.828627	6.14904e-05	0	0	1	0	0	0	78	83	71	45	49	29	84	83	274	1	5	24				Pyroxd2	0.677932	3.50088	0.0073661	61	49	70	13	3	13	305	260	187	89	99	87	48	33	177	7	2	6
Idua	1.20122	0.263297	6.18854e-05	565	573	536	334	388	450	455	402	394	256	286	295	296	254	385	421	427	436				Tcea3	0.555033	-1.11085	0.0073661	370	372	182	40	42	36	1405	1517	1400	349	414	472	39	50	645	392	530	378
Peli1	-2.09172	0.423495	6.26296e-05	465	479	355	427	703	352	984	1030	1051	2027	2012	1853	1527	1300	1214	1624	1441	1356				Dnajc6	0.721981	-3.22518	0.00742658	8	9	5	20	10	8	2	2	2	0	2	2	4	28	7	17	48	18
Irx3	5.72621	0.701563	6.26377e-05	245	294	463	159	278	925	0	1	1	4	2	4	30	4	7	55	62	213				Ptprj	0.300058	-1.0731	0.00743836	2163	2302	2538	2032	2238	2109	1619	1906	1806	2865	2977	2940	4569	3846	4029	6960	6233	5560
Acsl1	-1.42144	0.294536	6.27511e-05	1536	1513	1432	830	969	889	4411	4474	4864	3461	3754	4018	1643	2014	1769	2142	1657	1320				Itpr2	0.419372	1.58132	0.00751809	302	246	267	421	628	293	768	814	941	481	432	448	566	330	608	190	169	232
Depp1	4.00299	0.667756	6.28781e-05	5900	6306	2253	1748	1255	1202	422	582	353	45	74	49	168	49	185	253	143	106				Prkn	0.573165	-2.22889	0.00756054	77	61	52	42	34	59	3	0	3	4	8	4	12	4	9	15	23	29
Oxr1	1.51719	0.317422	6.34048e-05	5534	5069	4986	3922	4494	4469	1970	2268	2242	1180	1133	1377	2242	1795	1557	4747	3769	3024				Retnlb	0.949668	-6.40641	0.00757568	0	0	2	0	0	0	0	0	0	1	0	0	1	1	0	19	144	88
Cxcl15	6.90712	0.791788	6.34212e-05	144	81	106	18	28	44	0	0	0	0	0	0	0	2	0	1	0	1				5730416F02Rik	0.518772	-2.36191	0.00757735	39	24	15	26	26	17	5	6	3	10	20	5	39	19	12	86	78	83
Vwa5a	2.07958	0.441354	6.34427e-05	2866	2800	2642	1673	1456	2099	1307	1499	1553	532	532	602	1111	742	1414	3164	3167	3045				4933405D12Rik	0.692441	2.27286	0.00758285	2	2	3	6	3	2	4	3	2	15	16	13	1	0	0	3	2	3
Atxn10	1.54491	0.321148	6.36139e-05	4910	4485	4898	3926	4859	4633	1928	2183	1964	972	1204	1142	2553	2053	1802	2399	1891	1610				Gstm1	0.488314	1.9121	0.00758285	7144	8940	4942	5431	2860	3135	2665	2216	1353	3375	4486	5043	1006	1115	1056	1226	940	612
Eml6	1.87362	0.388951	6.41627e-05	256	239	169	124	148	129	56	87	83	42	68	55	49	52	50	138	170	120				Nsg2	0.885788	-4.21667	0.00758285	1	1	2	2	0	0	0	0	1	0	1	0	0	2	1	8	21	14
4930447F24Rik	3.52132	0.62043	6.45431e-05	1034	759	1223	370	195	285	58	140	61	92	69	85	39	7	71	225	426	115				Slc7a8	0.65392	3.40014	0.00761259	2	5	40	12	4	8	1102	935	862	1825	1581	2029	2	5	10	40	110	85
Rcc1	-1.44929	0.318187	6.51828e-05	1061	1145	1320	2048	2477	1773	2282	2239	2300	2191	2552	2883	3647	4327	2203	2922	2427	2374				Mslnl	0.918694	3.44118	0.0076244	14	10	12	4	4	13	18	12	17	4	3	4	12	26	20	0	0	0
Lca5	1.6772	0.347132	6.52364e-05	399	408	404	249	277	227	114	147	124	85	104	100	83	60	61	336	265	287				Nkd2	0.972143	3.00265	0.00773207	8	11	3	13	9	25	3	1	5	2	4	0	5	3	0	0	0	0
Lipg	-2.56601	0.50223	6.56066e-05	81	85	186	241	264	189	1417	1227	827	529	621	771	370	555	287	551	503	469				Gm6762	0.307108	-1.08835	0.00773567	66	74	92	82	81	82	70	76	60	96	103	116	86	81	98	228	198	205
Mcm10	-1.73549	0.368002	6.5661e-05	447	569	723	1090	917	914	2195	2134	2087	1460	1533	1925	2566	3463	1854	1605	1439	1643				Gm3126	0.931078	4.69138	0.00773628	0	0	0	0	0	0	12	9	9	14	12	12	0	0	0	0	0	0
Zfp92	-3.61823	0.581736	6.59383e-05	9	16	4	13	11	9	111	91	96	283	212	202	9	13	17	49	50	41				Plin4	0.812441	-3.20431	0.00774797	519	379	54	37	13	25	3	3	1	2	1	2	2	0	1	50	36	21
Mlkl	1.28151	0.268732	6.64432e-05	894	1004	928	1496	1390	1025	354	348	303	274	351	375	1092	851	750	1951	1728	1852				4930415O20Rik	0.669702	-2.31573	0.00774896	38	79	61	58	28	29	21	32	9	1	1	5	21	10	25	38	60	59
Rnf130	2.67793	0.586141	6.67274e-05	1528	1665	1571	1224	1585	1403	828	1153	1104	134	160	138	146	204	507	2201	2248	1702				Rab3c	0.591909	2.85722	0.00774896	1	0	0	0	0	0	233	264	447	93	97	102	17	54	137	4	16	5
Lypla1	-1.37938	0.290208	6.70123e-05	1484	1483	1276	1653	1797	1712	3687	3848	3659	4929	4862	5141	2471	2823	3203	3951	3518	3409				Slc23a1	1.04362	5.28604	0.00775648	0	0	0	1	0	0	5	7	1	80	86	35	0	0	0	0	0	0
Pomk	1.07435	0.234669	6.71975e-05	917	853	890	914	999	946	665	765	726	429	460	499	463	494	583	807	649	525				Gm10499	0.878196	4.9952	0.00778215	1	0	7	6	25	25	82	80	85	367	258	319	1	5	55	2	1	2
Pcdhga6	2.88012	0.592255	6.77191e-05	29	36	12	6	18	22	12	7	12	7	6	3	4	7	28	8	2	4				Tmem89	0.934054	4.92317	0.00778215	0	0	0	0	0	0	29	20	16	25	20	39	0	1	5	0	0	0
Olfm4	-7.82384	0.798743	6.98643e-05	1	0	1	19	43	8	31350	39164	53331	26952	24780	35173	322	1366	5496	1	40	36				Flnb	0.298875	-1.07575	0.00786824	38792	38538	43993	46259	58441	45512	15135	16727	12075	21295	25134	22415	56389	37742	37507	69456	51576	59413
Col23a1	2.09294	0.624319	6.99797e-05	16	13	4	2	2	6	6	11	14	2	1	6	0	0	6	1	8	6				Kazald1	0.420182	-1.32085	0.00789638	66	102	82	45	42	61	39	28	37	15	36	29	18	11	49	62	44	32
Tnfrsf11b	3.15827	0.507066	7.01516e-05	5286	3743	5179	2812	6248	8344	63	97	86	240	272	154	4529	2840	934	6681	3637	3442				Rec8	0.471365	1.5442	0.00790961	1824	1852	2624	1788	3128	3399	726	792	841	1398	1426	1664	1721	523	346	506	544	1355
Brms1l	1.07859	0.234863	7.1147e-05	858	746	657	588	662	593	430	479	470	281	294	351	432	465	399	513	440	499				Ttc39aos1	0.363141	-1.36678	0.0079298	189	225	228	297	257	252	69	51	41	98	57	106	277	201	156	456	221	255
Txndc12	1.22225	0.261691	7.1147e-05	2583	2656	2399	3294	3901	3703	1551	1590	1532	1087	1148	1337	1392	1398	1461	1426	1139	1164				Gm14418	0.529999	-1.88902	0.00793381	21	14	35	31	13	17	6	12	7	7	8	3	11	24	23	34	20	26
Rcn2	1.34201	0.286185	7.11474e-05	2300	2044	2076	1775	2314	2216	1075	1225	1155	623	634	722	1187	1180	971	996	1006	867				Kcnh2	0.305392	1.13198	0.00795374	365	313	204	178	174	167	137	134	128	126	136	118	109	169	293	37	35	34
Elovl6	-1.94838	0.409432	7.13988e-05	1192	1618	1922	2931	2914	2156	4122	4303	3639	6094	6702	6863	3402	3743	2613	4032	3969	4066				Gcnt4	0.46828	1.87079	0.00796786	334	296	401	735	674	663	1994	2078	1476	2604	2720	3027	243	412	854	643	488	390
Ntf5	3.2123	0.544502	7.17351e-05	311	273	262	173	305	263	8	12	2	27	30	22	83	60	53	74	84	81				Rtn4r	0.563402	2.14966	0.00801889	9	13	12	22	11	19	26	14	22	14	16	20	11	6	7	3	5	6
Akr1c12	-1.0489	0.2261	7.17666e-05	2002	2461	1860	2314	1614	1544	4287	4739	4252	3932	4373	4621	2567	2380	2415	4945	4405	4036				Inpp1	0.315166	-1.07571	0.00805622	209	256	187	230	233	241	254	264	259	111	139	122	292	265	275	394	352	404
Myh7	3.1091	0.650935	7.17666e-05	131	162	76	50	61	60	49	52	65	3	4	5	3	7	21	1	1	0				Ky	0.868673	5.47789	0.00805894	2	0	1	2	2	0	1002	1113	1332	72	128	144	3	13	44	0	7	0
Nrap	-3.08615	0.550739	7.1922e-05	10	3	4	2	7	2	67	61	33	63	90	92	37	46	82	560	505	339				F5	0.567438	2.77198	0.00807093	2491	3018	3455	3008	4452	4494	92	100	65	33	40	17	8	6	11	2	11	7
Lrmda	3.66502	0.660291	7.21342e-05	142	94	85	24	8	68	8	36	7	6	5	6	1	4	10	0	0	2				Spred3	0.364681	-1.31229	0.00808201	1033	906	655	474	744	1145	83	92	72	83	107	85	398	182	211	414	272	256
Tmem86b	-1.86646	0.380175	7.21342e-05	81	81	71	62	85	60	271	225	204	326	350	340	83	148	119	85	70	82				Vwf	0.519331	-2.0368	0.00808689	19	31	38	24	24	42	51	78	66	16	51	30	137	34	99	276	163	221
Neurl3	-1.58182	0.328589	7.32665e-05	2041	2706	1172	1819	2691	1805	5740	6494	6035	6877	7196	7475	4224	4321	4880	6351	5209	4693				Sypl2	0.938553	4.54198	0.00809151	0	0	2	2	0	1	40	26	39	9	7	17	2	1	6	0	0	0
Fgfr2	1.96551	0.456201	7.34638e-05	2728	3272	2461	2136	1535	1333	2548	2920	2913	760	819	1102	400	662	1305	2789	2804	1922				Wdr19	0.305714	-1.01183	0.00811949	1114	879	859	557	650	706	358	419	328	189	264	196	379	313	386	620	532	407
Stxbp5	-1.12013	0.245339	7.37698e-05	1306	1333	1363	1494	1592	1449	1842	2010	1954	2334	2801	2860	2652	2606	2086	2680	2171	2348				Insm1	0.737407	3.2471	0.00813236	35	25	23	56	491	100	229	327	351	96	153	159	56	155	156	20	17	12
Aspdh	-6.22493	0.775405	7.40627e-05	0	0	0	0	0	0	24	17	14	42	46	44	0	0	0	0	0	0				Card19	0.32138	-1.1427	0.00814912	1053	1160	1274	1062	1023	1004	404	489	389	715	756	713	696	522	565	1843	1655	1510
Gm4798	2.36741	0.474714	7.45219e-05	209	239	495	456	487	402	129	154	129	69	58	107	57	59	101	89	87	56				Glis2	0.338717	-1.1798	0.00819182	1351	1281	1098	795	1182	1091	255	298	250	133	238	117	784	732	537	848	514	447
Myof	2.61697	0.452926	7.46831e-05	25893	25634	21521	21785	28032	25865	624	875	489	1576	2213	1325	19575	12571	4535	22856	14569	14645				Peg3	0.670325	3.73414	0.00821675	1616	1348	1665	678	671	728	250	317	274	34	26	39	19	32	68	6	5	2
Khk	-3.09429	0.521812	7.47531e-05	713	723	613	430	282	452	5148	6084	5729	13146	12034	14118	285	352	818	371	441	311				Galr3	0.736925	4.14335	0.00823953	63	50	53	22	15	15	66	72	48	28	36	38	3	0	3	1	1	1
Mfsd4b2	-6.84123	0.842143	7.48202e-05	0	0	0	0	0	0	85	127	143	251	202	268	1	2	19	0	3	0				Kcnk3	0.842983	-1.28575	0.00829348	6	6	2	0	3	0	4	14	10	0	1	0	0	0	8	10	8	4
Dync2li1	2.81709	0.539676	7.49933e-05	1036	985	629	446	530	789	189	254	238	59	49	79	121	98	107	107	90	60				Gm11240	0.562203	2.24103	0.00830676	4	2	1	3	4	3	38	46	34	24	18	28	11	7	18	8	2	3
Bora	-1.29645	0.284689	7.54035e-05	470	534	609	719	727	622	1361	1190	956	709	990	985	1606	1990	1021	1183	929	847				Gm11586	0.582147	2.58492	0.00832546	1	2	1	2	3	0	33	43	36	37	30	41	2	4	10	7	3	1
Anpep	2.17533	0.538917	7.54491e-05	3392	3721	6465	2927	1795	4299	4109	4878	7470	6211	6194	5795	53	179	1950	11	20	5				BC067074	0.880889	4.04939	0.00835365	33	14	10	13	10	22	69	68	63	2	4	7	10	15	4	1	0	1
Map3k5	1.32602	0.284346	7.58641e-05	2627	2562	2115	1444	1647	1541	898	933	987	732	733	818	1375	1375	1105	1621	1174	1363				Stac	0.905223	3.46334	0.00840305	2	2	2	5	4	2	23	6	10	7	1	6	10	8	4	1	0	0
Adam10	1.02724	0.223031	7.65583e-05	14896	13927	16012	13411	16442	15795	6276	7024	6627	7859	7843	8041	7047	6257	7026	10586	9513	9699				Slc35f2	0.479111	1.6472	0.0084279	30	17	7	39	83	32	917	1091	1068	751	766	906	269	324	277	399	305	259
Akap12	4.6692	0.699502	7.7106e-05	120	87	26	34	81	53	2	2	3	0	2	1	18	4	11	6	2	0				Tk2	0.317019	-1.05463	0.00844167	782	754	574	480	601	621	376	468	387	178	201	208	422	391	389	622	609	476
Hoxb4	-4.66577	0.863413	7.8004e-05	0	0	0	0	0	0	26	24	29	9	8	1	281	320	42	26	56	194				Gng4	0.711681	3.59168	0.00844468	0	2	2	1	2	0	115	120	167	26	31	40	3	9	18	4	1	2
Eef1akmt3	1.95813	0.405111	7.8093e-05	58	54	89	72	63	65	24	26	25	23	18	23	21	29	34	11	12	17				Esrrg	1.00304	5.1078	0.00850652	42	39	84	0	0	0	1529	1424	1490	182	157	231	35	57	147	0	0	1
Cnpy1	-5.21554	0.677719	7.83173e-05	1	2	3	3	2	0	194	227	161	452	162	279	1	5	17	7	3	1				Prdx6	0.364968	-1.37257	0.0085507	14175	15107	13761	13712	13617	16398	10669	11923	9896	22430	23074	21881	23066	19241	14296	60741	69701	67119
Tmem25	-1.92759	0.384286	7.85294e-05	55	47	17	22	32	24	199	211	246	143	142	150	122	107	127	162	122	135				Tmem273	1.05288	-4.21977	0.00859192	1	0	0	0	0	0	0	2	0	0	0	0	0	0	2	3	28	30
Gm8989	-6.47838	0.840192	7.91901e-05	0	0	0	0	0	0	398	315	375	116	99	179	4	3	32	46	82	442				Slc35c2	0.364077	1.23811	0.00865463	1428	1333	1336	1402	1458	1389	1249	1361	1317	2809	2631	2883	1362	1279	1073	1371	1154	1093
Gkn3	5.05817	0.705162	7.93929e-05	36552	44273	37887	71288	75554	76939	1921	2388	3007	179	242	266	18	47	28	4	7	0				Cyp3a41a	0.763186	3.88484	0.00867028	0	2	0	5	2	0	31	55	43	57	63	53	2	0	9	3	0	2
Rasgef1a	3.68295	0.592907	7.95994e-05	127	123	128	108	173	203	15	4	9	1	7	0	35	19	15	88	45	31				Gm47171	0.805014	5.37162	0.00867028	0	6	0	0	0	0	133	117	74	70	50	72	0	0	0	1	0	1
Ebf4	3.75108	0.654122	7.96056e-05	45	51	22	11	10	17	3	3	10	2	0	4	2	3	7	0	0	1				Sncg	1.03657	2.02717	0.00867544	4	0	0	13	12	4	0	0	0	2	2	2	17	6	0	0	0	0
Sema7a	-1.76728	0.351402	7.99999e-05	750	671	421	460	842	685	5354	4835	5005	2665	2713	2979	2941	3643	4936	2228	1713	2310				Eif5a2	0.369771	-1.37306	0.00869613	66	41	43	49	61	40	38	40	71	69	49	52	133	92	76	142	228	184
Zfp174	1.44413	0.314665	8.04993e-05	176	213	194	137	227	180	122	143	140	78	79	78	75	71	101	118	104	84				Cxxc4	0.533955	2.16051	0.00875891	94	51	49	52	95	66	82	83	89	21	27	32	98	182	235	9	7	6
Arhgap27os2	-1.66344	0.335858	8.05945e-05	51	49	49	58	74	51	245	347	316	329	320	340	104	109	236	125	127	110				Rdh1	0.57427	-1.72119	0.00875891	18	10	11	7	5	13	22	29	27	8	12	15	47	58	231	4	60	25
Pkhd1	2.82991	0.481088	8.07288e-05	788	723	664	498	471	504	27	36	42	18	36	31	189	55	28	818	528	429				Anks6	0.463494	1.97702	0.00880551	387	438	298	242	244	254	126	146	131	41	40	50	29	26	68	6	15	10
Pycard	-2.40909	0.436659	8.13239e-05	579	664	191	364	188	340	4850	4778	4359	4357	5090	5689	1274	1705	3375	1946	2431	2029				Klf15	0.863062	4.027	0.00882301	161	140	120	66	42	49	50	97	59	16	8	25	2	5	27	0	0	0
Sox5	3.28567	0.547941	8.14648e-05	197	222	223	233	226	213	31	22	23	4	7	8	25	35	12	13	7	4				Ccdc92	0.296194	-1.06901	0.00884363	265	269	260	303	423	345	74	54	46	85	80	85	95	137	68	301	237	210
Tmie	1.72146	0.378906	8.18342e-05	1091	1025	639	374	482	616	398	507	431	525	427	489	110	127	267	282	248	227				Anxa3	0.361982	-1.39165	0.00895776	21185	19150	18106	19833	23934	24904	1080	1393	1009	2343	3293	2168	18065	12283	5962	14208	10802	8903
Ccdc129	3.2979	0.671132	8.2092e-05	204	230	250	157	121	239	96	95	118	6	12	6	10	8	62	0	0	5				4930455G09Rik	0.930019	3.4276	0.00899216	1	3	2	3	2	2	3	1	0	14	7	14	6	3	1	0	1	0
Tinagl1	1.949	0.368242	8.27654e-05	6966	5868	7284	7973	10060	8733	438	509	353	872	966	857	3152	2695	1035	3660	2575	2239				Ctsf	0.538476	-1.52987	0.00904126	1385	1000	662	291	393	586	181	246	273	63	75	36	76	54	154	250	275	218
Klhdc1	1.93991	0.411282	8.30215e-05	352	368	279	286	256	294	143	187	194	63	76	73	144	124	165	226	186	139				Dynap	0.652835	-3.38076	0.00907268	2	2	0	6	5	2	4	9	7	32	28	21	1977	370	464	220	290	572
Ifitm2	1.63529	0.361021	8.51146e-05	2014	1930	2988	1584	1779	1873	2108	1791	1361	823	827	1090	693	872	1269	338	362	373				Cited1	0.720796	-3.47075	0.00908625	14	12	24	25	4	14	12	22	4	13	3	5	18	0	6	71	198	244
Hopx	-2.48752	0.477582	8.55971e-05	498	536	1366	903	323	655	3585	4462	4731	4486	3987	4953	4140	4632	4072	5514	4141	3257				Prss22	0.509467	-2.2794	0.00910858	2489	1588	1866	1826	3424	3101	7	8	6	40	43	24	190	153	38	320	266	370
Scara5	7.85371	0.779664	8.57288e-05	224	168	100	31	147	260	0	0	0	0	0	0	0	0	0	0	0	0				Cacna1a	0.442777	1.93122	0.00911873	97	67	49	34	37	44	741	755	698	178	246	297	100	241	385	56	58	43
Cyp21a2-ps	7.06528	0.758167	8.71445e-05	86	68	78	31	95	84	0	0	0	0	0	0	0	0	0	1	0	0				Gpx3	0.788759	3.21655	0.00911873	120	77	88	116	261	288	136	156	208	18	11	20	42	10	9	4	18	1
Miat	-4.38881	0.731547	8.72172e-05	5	3	0	0	0	2	45	59	60	37	45	115	21	122	24	2	0	0				Rab26os	0.401356	1.37712	0.00911873	73	70	99	52	80	75	145	109	151	60	60	83	97	90	45	57	48	42
Gm49410	-5.10567	0.832493	8.74507e-05	0	0	0	0	0	0	14	7	18	18	17	16	5	2	4	1	0	0				Aim2	0.595339	-2.56638	0.00912823	34	387	67	48	132	75	283	320	290	400	561	395	2887	1793	1627	3410	3096	2547
Gm7269	4.78162	0.636928	8.94539e-05	104	65	46	24	31	47	2	3	3	0	1	2	1	2	0	0	8	2				Pla2g10os	0.674094	-2.27249	0.00914445	12	17	6	10	5	2	3	9	10	0	3	2	3	5	8	25	24	8
Il18rap	3.26947	0.522219	8.96829e-05	373	348	335	372	1063	731	7	5	6	20	23	13	289	242	68	273	123	110				Pla2g2d	0.72838	2.53851	0.00914445	65	31	123	49	52	30	50	67	78	11	8	14	108	121	18	13	6	2
Slc2a12	5.45328	0.691795	8.98228e-05	151	228	97	80	16	24	2	5	1	1	0	1	0	2	0	0	2	0				Nefh	0.414644	-1.33122	0.00917584	114	109	82	95	125	102	39	47	36	19	26	23	27	53	56	35	103	47
Aaed1	1.09531	0.244287	9.03045e-05	2490	2404	1491	1715	1883	1545	1453	1589	1734	1025	1049	1167	1076	1138	1342	1939	1572	1493				Ascl1	0.946941	-2.7898	0.0092038	30	17	24	1	1	11	0	0	0	0	0	1	0	0	1	3	6	3
Cdx2	-4.7703	0.680664	9.03659e-05	20	91	40	484	143	13	6607	7358	6401	6068	6992	7534	5231	5582	8282	6313	7482	9426				Fbln2	0.625622	1.91793	0.00920537	6317	3980	7880	7016	18385	18195	45	51	57	33	32	30	708	158	35	24	65	4
Slc23a2	-2.64767	0.519496	9.0821e-05	597	562	479	576	606	444	1096	1148	1136	3505	3252	3378	2500	1715	1319	4235	5360	6841				Elovl2	0.963482	3.19491	0.0092164	0	1	1	2	2	0	0	8	12	8	4	4	5	2	0	1	0	0
Ndufaf4	-1.22705	0.270242	9.209e-05	599	656	562	646	753	713	919	963	1116	1331	1234	1458	932	1217	808	1410	1241	1153				Vim	0.651754	2.75067	0.00922765	7	4	12	15	59	47	390	407	395	132	131	211	61	49	93	26	38	23
Palm	2.70881	0.503643	9.29982e-05	361	282	230	164	218	112	27	24	25	22	46	38	65	28	46	120	103	67				Rac2	0.781169	4.00431	0.00929187	28	15	13	12	27	22	100	93	117	24	8	31	6	3	25	2	1	0
Cers6	-1.61549	0.339409	9.32492e-05	1951	1990	3023	4076	2814	2537	8310	8910	9984	8689	8728	9412	5534	6507	6734	8639	8098	8183				Fyb2	0.652044	-3.12188	0.00932853	2	5	5	0	1	0	6	10	16	19	29	10	18	19	11	78	122	320
Stx2	1.58309	0.337451	9.37671e-05	273	260	188	128	195	176	86	91	87	48	71	82	87	79	75	145	117	97				Spin4	0.547204	-2.5091	0.0093605	56	71	47	75	37	55	14	15	12	3	2	5	2	0	1	89	58	26
Snhg3	-1.004	0.230305	9.46625e-05	263	266	321	349	338	256	282	283	311	250	251	289	566	598	213	400	274	264				Dok7	0.320331	-1.15123	0.00937776	466	417	720	703	870	783	189	222	164	168	206	210	686	983	513	934	709	426
4833417C18Rik	-2.36882	0.47984	9.52475e-05	9	6	13	8	9	9	49	50	67	33	30	32	44	36	25	27	15	21				Plekhb1	0.716749	3.6095	0.00952348	648	511	162	60	148	193	177	192	148	37	27	33	59	26	91	5	2	3
Eva1b	2.7006	0.492295	9.56218e-05	315	292	224	147	225	247	11	32	12	23	32	38	86	48	43	53	48	73				Sdr42e1	0.367768	-1.10928	0.00969431	719	826	593	253	254	363	890	937	1032	475	513	550	410	474	867	757	964	829
Atp2a3	1.43244	0.338215	9.70817e-05	3531	4469	3203	2746	2127	1977	5535	5075	4969	2403	2728	2730	2558	2642	8848	13071	9386	8258				Gm38250	0.413251	-1.25325	0.00972646	17	22	29	10	18	23	28	23	25	12	17	19	5	8	22	25	28	27
9430018G01Rik	6.64828	0.768316	9.71646e-05	67	55	49	10	33	30	0	0	0	0	0	0	0	0	0	0	0	0				Gm1600	0.583549	-2.86944	0.00974256	13	10	8	18	9	10	2	2	0	9	15	9	27	22	10	96	70	117
Ccdc157	1.83776	0.389253	9.71646e-05	775	815	501	336	401	444	235	224	260	145	136	159	215	250	188	237	198	194				Eid2	0.422615	-1.43207	0.0097523	152	116	90	51	120	130	42	61	38	24	28	29	58	54	55	62	95	123
Nasp	-1.34777	0.2985	9.71646e-05	1685	1756	2352	2761	2912	2522	4113	4750	5075	3532	3724	4227	4947	7119	3614	4055	4045	3750				4631405K08Rik	0.939489	-2.86061	0.00975987	57	37	12	1	3	4	0	1	1	0	0	0	0	1	0	5	8	6
Pdxdc1	1.01289	0.228701	9.71646e-05	16030	15948	12643	11009	9650	10006	11301	11979	12023	7871	8538	9138	7836	8242	10739	16600	14366	11306				B4galt2	0.425786	1.53056	0.00980295	407	325	163	197	260	247	73	57	56	40	26	51	177	139	134	28	12	14
Dusp23	1.45634	0.33365	9.76108e-05	266	214	197	186	147	155	276	245	219	125	118	141	58	48	125	169	138	160				Flt3l	0.299682	-1.02659	0.0098468	156	119	106	93	89	100	51	48	43	41	62	45	102	77	72	163	109	95
Slc7a8	-5.46534	0.654341	9.90704e-05	2	5	40	12	4	8	1102	935	862	1825	1581	2029	2	5	10	40	110	85				Gm5112	0.392827	-1.28698	0.00992563	32	16	19	14	17	21	24	23	24	13	23	23	17	13	32	44	46	26
Gal3st2b	-4.87971	0.79575	0.000100017	2	0	0	0	0	0	68	56	81	36	25	44	2	9	9	2	5	3				Il18rap	0.479143	-2.04985	0.00994161	373	348	335	372	1063	731	7	5	6	20	23	13	289	242	68	273	123	110
Mtch2	-1.25097	0.271308	0.000101337	2261	2300	2164	2465	2788	2464	5229	5548	5022	6588	6686	7426	3220	3963	4139	4444	4395	3775				2010016I18Rik	0.365017	-1.26599	0.00994328	653	690	681	360	275	298	444	405	362	406	458	480	697	705	574	1256	1068	1013
Mlh3	1.0421	0.235916	0.000104157	900	793	725	704	734	731	747	809	752	438	432	542	543	457	738	887	723	766				C1s1	0.875999	4.4428	0.00994328	18	12	25	14	38	22	104	98	126	9	4	10	10	16	47	0	1	0
Pla2g4a	1.20826	0.263141	0.000105532	4843	4231	5451	5651	5380	4946	2208	2483	2656	1460	1634	1719	3202	3778	2580	4878	4352	3989				Scube1	0.954726	3.58087	0.00994328	0	0	0	0	0	0	12	4	6	4	8	23	3	9	2	1	0	0
Wnt11	4.43371	0.664097	0.000106247	96	148	57	10	18	17	1	6	4	4	2	1	0	1	1	0	0	2				Kctd11	0.446139	-1.61434	0.00996585	1454	1302	2090	1815	2443	2044	296	322	240	529	601	496	1099	456	1138	1572	1596	1545
Tmprss3	4.27745	0.625955	0.000106308	33	72	20	16	13	19	5	4	3	0	0	0	0	0	0	0	0	0				Dner	0.799675	3.31059	0.00997853	0	1	0	0	2	1	27	25	16	12	18	26	3	20	19	3	0	0
Gm42793	7.74903	0.778294	0.000107057	269	269	133	114	134	139	0	0	0	0	0	0	0	0	0	10	0	0				Gm20684	0.480827	1.27016	0.0099815	34	30	32	69	49	27	12	21	17	17	27	13	28	15	0	22	19	29
Plgrkt	-1.58751	0.323487	0.000107339	949	908	597	809	715	716	4403	4504	3491	4749	4902	4755	2196	2065	5000	7686	6034	5202				A530013C23Rik	0.934641	3.35436	0.0100361	11	7	13	3	9	5	7	3	13	4	6	7	4	6	7	0	0	0
Sall2	3.0396	0.635495	0.000107428	341	314	260	27	98	82	98	112	56	24	23	27	17	15	51	1	13	8				Tcn2	0.330994	1.2191	0.0100361	4306	4199	3401	2394	3290	3146	4043	4342	3865	5584	5658	5798	1373	1053	3008	1443	1693	1284
Arap1	1.08473	0.244651	0.000107512	3799	3428	3521	1988	2651	3105	2525	2683	2337	1844	1945	2211	2165	1877	2867	3609	2974	2591				Gm5431	0.629526	-2.5226	0.0101066	7	9	2	16	12	6	6	7	13	13	19	4	24	13	39	45	41	109
Gm6245	-1.33363	0.294887	0.000107621	180	180	164	188	202	174	270	264	291	407	409	369	301	368	242	411	369	366				Tacstd2	0.614332	-3.12262	0.0101187	1572	1537	1939	2286	2907	2632	0	4	6	18	57	37	1406	770	163	729	728	478
Golim4	1.19226	0.26094	0.000107621	6714	6119	6643	6596	8149	7256	3729	3797	3977	2200	2409	2649	3215	2650	2632	2583	2394	2517				Map3k8	0.34376	-1.19812	0.0101405	68	55	55	74	41	70	44	49	59	28	31	36	77	44	51	129	109	92
Gm48510	3.93975	0.64397	0.000108086	42	41	22	27	47	64	4	2	4	4	3	0	7	2	10	0	0	0				Bmp1	0.517915	2.04774	0.0102345	968	817	856	404	1114	1062	507	580	697	196	138	190	238	247	148	74	85	107
Nkx2-2	-5.27972	0.73531	0.000108175	5	0	0	1	0	0	284	358	424	77	82	127	16	56	87	8	2	7				Trpm5	0.628759	3.78915	0.0102704	256	162	215	29	34	63	1490	1531	1702	281	222	293	97	191	1087	5	13	22
Cbx4	1.01809	0.226004	0.00010897	1268	1283	1259	1001	1145	1120	631	681	575	689	699	785	384	354	428	234	260	238				Acaa1b	0.638724	2.78696	0.0102866	366	390	245	174	196	216	401	502	306	2369	2545	2183	79	89	169	130	141	217
Dnaaf3	2.96836	0.528512	0.000110046	305	350	305	259	205	183	23	45	24	18	18	21	75	13	28	121	90	114				Gldc	0.682903	2.69382	0.0102866	613	961	343	1390	1499	914	4	14	7	22	21	12	7	15	12	3	1	3
Gm4737	-1.54948	0.333727	0.000110461	396	444	605	736	873	674	1788	1787	1602	1341	1585	1920	1250	1684	1359	2013	1941	1917				Junos	0.440946	-1.41862	0.0103457	80	55	83	33	50	38	35	42	58	15	17	27	29	22	37	62	59	71
Gm17197	-4.14282	0.729787	0.000110758	2	1	0	1	0	0	21	36	18	31	33	25	10	19	22	58	40	16				Ryr3	0.592087	-2.21553	0.0103614	4	2	4	2	0	0	17	16	24	25	4	9	6	11	11	34	69	71
Rab30	-3.04031	0.557933	0.000111002	43	40	47	75	73	56	224	238	227	617	809	567	67	69	92	75	54	37				Hrct1	0.597396	-2.15278	0.0104123	156	159	94	112	85	81	5	5	2	1	1	0	14	3	5	13	16	16
Dpep1	-7.16236	0.787899	0.000111371	0	0	0	2	0	6	432	640	431	2712	2751	2287	39	99	652	2101	2669	1882				Ifit1bl1	0.557515	-2.12736	0.0104274	28	25	24	38	30	20	97	205	279	609	532	365	458	350	1293	1660	1308	1040
Padi2	4.04944	0.655821	0.000111371	242	114	272	178	342	337	20	15	20	4	6	9	6	6	9	47	110	696				Iqcb1	0.331013	1.17138	0.0104274	269	210	273	206	166	210	198	245	278	116	127	134	208	238	209	70	66	77
Tdrd5	3.4648	0.50309	0.000112207	483	360	205	367	450	459	10	12	14	7	14	16	27	17	4	2	1	1				Kcnj2	0.56588	2.5716	0.0104436	58	54	75	56	22	34	174	193	209	134	93	95	39	8	143	4	18	8
Prkn	3.56977	0.60513	0.000113375	77	61	52	42	34	59	3	0	3	4	8	4	12	4	9	15	23	29				Insl5	0.799678	-4.5518	0.0104692	0	0	0	0	0	0	0	1	1	0	1	1	0	2	1	35	25	18
Dnajc28	1.65603	0.379077	0.000113577	445	350	375	165	291	357	312	353	358	161	155	175	120	119	239	314	333	358				Hoga1	0.376719	-1.26633	0.0105006	122	93	93	42	73	54	33	54	59	38	37	36	67	46	58	113	93	92
Slc7a15	-6.31378	0.846686	0.000113577	1	0	0	0	0	0	29	48	43	166	127	166	2	2	8	1	2	3				Anxa8	0.756608	-3.99433	0.0105054	16666	12232	13590	5497	13099	17339	23	46	13	376	530	290	6085	4204	1399	15908	9529	7332
Spock2	3.1761	0.592119	0.000114616	339	144	94	107	84	79	31	37	31	6	15	10	34	27	35	9	5	11				Erich4	0.62388	3.17067	0.0105659	0	0	0	0	0	0	189	260	186	423	399	391	4	6	62	6	14	16
Glp1r	4.26135	0.659451	0.000114657	68	40	59	4	15	21	3	1	6	1	2	0	0	0	1	0	1	0				Apobec1	0.452399	1.48154	0.0106011	190	185	131	280	321	325	328	385	398	930	972	834	563	447	359	385	368	325
Csrp1	1.64856	0.349248	0.000115642	3157	3345	3304	3944	5070	4180	1342	1420	1747	740	1008	1081	2108	2470	2147	1327	960	634				Cdk14	0.529861	-1.93754	0.0106565	693	781	455	840	546	586	74	121	118	27	54	40	145	59	91	625	338	121
Vsig2	5.77518	0.755084	0.000116217	13781	14362	10080	8350	9505	8634	218	313	137	3	5	5	3	2	2	4	14	9				Syne1	0.414878	-1.82256	0.0106699	35	29	47	94	63	41	20	27	21	58	72	61	748	432	113	595	480	428
Ceacam12	-4.29682	0.829511	0.000116286	0	0	0	0	0	0	6	6	10	5	6	11	6	4	3	30	36	32				Fam47e	0.957328	4.48666	0.0106889	0	0	0	0	0	0	5	8	5	13	16	11	0	0	0	0	0	0
Als2cr12	-4.01371	0.659591	0.000116591	2	3	1	11	8	3	60	45	45	162	171	139	88	56	125	40	51	48				Gm6665	0.410409	1.53529	0.0107076	2330	2759	1950	1497	1006	1074	873	972	677	1012	1293	1489	225	276	298	394	385	239
Paics	1.71413	0.365079	0.000116591	9030	8669	9231	7990	8923	8483	3642	4074	3970	1756	1821	2043	4572	4761	3802	5693	4058	3112				Slc6a19	0.837664	4.70564	0.0107462	5	8	5	0	0	0	352	459	414	1854	1469	1592	5	22	73	29	7	5
Cpeb2	-1.77448	0.389257	0.000117223	326	369	471	678	447	380	694	620	755	1094	1219	1142	1441	1197	874	728	516	579				Fads6	0.467051	1.85616	0.0109132	659	602	478	424	474	524	128	141	148	34	46	74	55	52	60	29	9	25
Sftpd	5.9271	0.644449	0.000118007	12471	12286	11741	6784	9014	11494	18	42	107	30	29	36	225	128	7	15	20	0				Svop	0.829386	3.53536	0.010991	7	2	2	4	10	11	12	6	7	40	51	29	6	3	9	0	2	2
Hmga2	1.44482	0.332344	0.000118567	953	958	1406	1203	1221	1276	1221	1195	1127	618	661	674	456	707	1118	1928	2246	1831				Eepd1	0.405976	1.54692	0.0109974	858	1020	515	361	359	418	930	965	961	1315	1468	1313	358	308	674	295	266	288
Epb41l1	1.93282	0.413314	0.000118671	2296	2519	1735	1441	1238	1131	720	871	746	423	478	364	1661	1028	1458	3018	2125	2269				Ccl9	0.588613	2.24865	0.0110151	13	25	72	154	125	115	1088	918	951	672	840	837	285	735	685	131	153	181
Mmp23	3.78128	0.6652	0.00012103	1860	1501	381	79	97	189	104	95	56	73	68	53	31	24	64	8	14	9				Nudt18	0.305001	-1.03707	0.0110151	605	557	611	529	583	578	183	250	165	254	343	342	414	288	352	739	647	601
Vopp1	1.55182	0.332473	0.000121238	4036	3725	3991	2469	2838	3387	808	1007	961	1185	1437	1253	2724	2185	2465	3376	2936	2783				Spag6l	0.621929	2.31515	0.0110151	58	51	54	20	48	52	21	12	21	13	5	23	17	12	10	2	3	4
Syde2	-1.57541	0.324528	0.000122228	277	315	398	376	279	279	2462	2424	2495	1229	1371	1633	544	821	1147	412	297	263				Gramd1c	0.402266	1.36055	0.0110977	392	334	295	276	298	287	250	245	298	584	641	477	286	361	252	227	209	203
Ifnar2	1.07938	0.240572	0.000122252	688	584	647	548	645	691	348	418	417	219	311	302	369	355	345	299	268	326				2510046G10Rik	0.439421	-1.30919	0.0111872	20	22	13	18	20	11	42	63	64	21	17	25	5	12	21	52	61	39
Cxadr	1.22535	0.27053	0.00012236	18390	18775	18156	15283	14068	14096	6439	7706	8250	8228	8611	7855	9139	6254	8927	7593	6574	5717				Onecut3	0.776286	3.49146	0.0112039	1706	1582	1609	993	1191	1122	31	32	25	6	5	10	2	6	5	1	0	0
Calcoco1	1.88863	0.416331	0.000122376	2617	2457	2284	1056	1264	1470	1225	1329	1208	524	633	700	918	626	1198	1357	1151	996				Rassf2	0.473759	1.93252	0.0113501	15	7	11	4	4	4	161	193	112	192	162	174	48	70	246	8	22	27
Fam241a	1.18322	0.262095	0.000122975	802	990	597	633	624	651	267	394	407	306	299	336	410	416	354	590	513	567				Apba2	0.840928	-3.52166	0.0114411	0	0	1	1	0	0	2	0	3	0	4	0	0	1	4	21	33	12
Gm17322	-2.77434	0.521442	0.000123286	17	16	4	12	27	22	191	190	182	102	77	104	119	144	124	490	368	177				Bhlhb9	0.837486	4.55865	0.0114411	336	255	104	31	28	13	130	155	140	22	30	31	17	11	26	0	1	1
Ppm1m	1.04474	0.230444	0.000123454	533	517	480	417	524	456	197	196	163	167	207	275	245	294	207	363	315	298				Tmem263	0.350565	1.21399	0.0114411	831	738	924	1064	731	786	621	614	563	985	997	1009	476	408	599	422	352	331
Tspan2	3.85054	0.604234	0.000123749	1595	1485	718	347	460	603	19	22	20	70	69	51	54	49	37	19	14	15				Snhg4	0.360386	1.10436	0.0114666	297	278	301	252	216	230	421	343	478	268	233	309	608	826	196	308	252	229
Stard4	-1.63745	0.345118	0.000124255	3039	3873	4628	5233	4199	3805	14158	15110	11215	17962	16543	17354	10018	12892	15358	15059	13782	12085				Gm11437	0.834522	5.12622	0.0114968	0	0	1	1	2	0	525	460	291	1989	1771	1724	2	13	259	3	8	12
Tent5a	-1.19064	0.26733	0.000124355	745	797	1153	913	820	813	1273	1214	1541	1456	1485	1399	2752	1898	1550	4336	3601	3363				Cyp4f37	0.553784	2.03201	0.0115794	52	68	32	68	68	66	174	110	137	506	491	461	58	77	77	90	110	59
Alpl	4.17806	0.65463	0.000124494	288	262	283	97	105	322	28	12	39	5	3	5	2	1	3	0	2	15				Eif4ebp3	0.565527	-2.32135	0.0115794	11	18	8	0	6	8	13	9	12	4	7	9	10	14	5	55	53	53
Ankrd42	1.74891	0.376859	0.000127508	248	219	173	111	147	139	62	89	62	57	70	52	96	60	89	105	114	92				Ccrl2	0.473991	-1.40212	0.0116822	165	167	149	61	87	123	21	37	33	18	6	12	30	16	48	40	39	32
Mtbp	-1.23732	0.282891	0.000127921	554	543	640	737	757	616	1120	1045	1122	666	750	917	1291	1583	655	838	712	714				Rhob	0.429598	-1.51582	0.0117557	2066	1810	1607	1222	1866	1714	699	851	559	1520	1660	1423	1212	815	1363	3812	4046	3247
Dixdc1	2.77879	0.582001	0.000129432	717	674	549	346	266	318	176	246	285	36	48	48	55	60	85	36	47	37				Fam198b	0.538796	1.63095	0.0117902	367	298	723	453	1031	1212	12	8	5	7	18	15	89	40	12	14	11	7
Zcchc3	2.80496	0.625489	0.000130135	172	140	57	60	136	13	45	58	51	20	14	24	0	6	21	94	77	26				Ak4	0.468894	-1.5715	0.0118181	1937	1696	3221	2472	2014	1935	2105	2447	1355	3752	3478	3598	1128	776	2648	5180	7632	7758
Fam117a	1.71449	0.380652	0.000130538	615	529	445	367	578	698	493	422	397	196	212	252	83	105	158	23	32	19				Zfp287	0.520543	-1.58681	0.0118327	88	85	25	29	71	58	60	64	62	13	20	18	22	21	44	84	69	81
Gm17753	-6.72748	0.781251	0.00013095	0	0	0	0	0	0	94	67	60	93	74	94	0	0	2	0	0	0				Sat2	0.487062	-2.50772	0.0120416	160	146	106	97	100	106	5	7	1	2	11	9	0	0	0	58	45	38
Tmem9	1.97001	0.42188	0.00013095	2272	2014	1987	1403	1857	1833	997	1031	831	341	359	432	824	846	804	708	718	492				4930513N10Rik	0.440846	1.41475	0.0120624	14	20	13	20	24	31	35	23	31	16	26	20	36	26	14	22	11	13
Ppp1r2-ps4	-1.26744	0.287965	0.000131208	83	84	90	90	103	83	103	115	97	145	146	168	209	236	126	233	223	185				Hspb1	0.870604	-3.12161	0.0121284	101	77	30	20	31	34	0	0	0	0	1	0	12	10	3	8	12	3
Adam22	3.1952	0.65261	0.000132342	91	56	46	3	9	7	12	7	18	4	1	6	1	0	4	2	1	1				Slc22a3	0.970382	4.08821	0.0121302	0	0	0	0	0	0	19	13	6	29	14	24	3	12	40	0	0	0
Kif9	2.18096	0.43401	0.000132342	367	394	252	169	219	193	36	43	48	44	65	41	119	84	69	133	91	75				Tut4	0.34535	-1.17341	0.0121415	3046	2813	3000	2444	2798	2416	603	458	379	772	873	942	2435	2207	2240	1919	1774	2007
Mrgpre	1.87651	0.403439	0.00013458	140	120	189	104	124	149	53	59	63	64	48	54	81	65	132	29	17	6				Ildr1	0.468332	-1.90396	0.0122277	557	556	1080	2330	1975	1479	807	892	800	1214	1665	1396	6270	3994	3323	8102	7300	8003
Ak5	4.20894	0.701832	0.000134751	47	28	22	8	11	16	0	2	0	2	3	1	2	3	6	1	1	1				Evx1os	0.839464	-5.37401	0.0122352	1	4	0	4	0	0	2	2	0	0	0	0	1	1	0	108	78	35
[truncated: 2,359 more rows]

## Sheet: mouse non-DEG
MOUSE
[truncated: 17,960 more rows]

## Sheet: genes not expressed
Gene	Corp_org_1	Corp_org_2	Corp_org_3	Pyl_org_1	Pyl_org_2	Pyl_org_3	Duod_org_1	Duod_org_2	Duod_org_3	Jej_org_1	Jej_org_2	Jej_org_3	Ileum_org_1	Ileum_org_2	Ileum_org_3	Colon_org_1	Colon_org_2	Colon_org_3
[truncated: 34,219 more rows]
